# Supplementary material for: Comparison of dorsal root ganglion gene expression in rat models of traumatic and HIV-associated neuropathic pain
Source: PubMed Central journal article supplement (PMC2706986; doi:10.1016/j.ejpain.2008.05.011), 2009-04
Supplement: mmc1.pdf [file mmc1.pdf]

supplementary table 1

Supplementary table 1: Probe sets identified as up-regulated 10% FDR ( $p < 0.004$ ) and  $> 1.2$  fold in the L4+L5 DRGs of gp120+ddC animals

| Probe set ID | Gene Title                                                                                                | Gene Symbol                           | Fold increase | p value     | FDR value   |
|--------------|-----------------------------------------------------------------------------------------------------------|---------------------------------------|---------------|-------------|-------------|
| 1397246_at   | Neurotrophic tyrosine kinase, receptor, type 2                                                            | TrkB.T1                               | 1.6           | 1.03E-05    | 0.035179964 |
| 1385556_at   | similar to KIAA0467 protein (predicted)                                                                   | RGD1308616_predicted                  | 1.4           | 2.59E-05    | 0.051799469 |
| 1371491_at   | Notch gene homolog 1 (Drosophila)                                                                         | Notch1                                | 1.4           | 3.59E-05    | 0.051799469 |
| 1378672_at   | Transcribed locus                                                                                         | ---                                   | 1.4           | 4.80E-05    | 0.051799469 |
| 1373189_at   | megakaryoblastic leukemia (translocation) 1 (predicted)                                                   | Mkl1_predicted                        | 1.4           | 6.65E-05    | 0.051799469 |
| 1378876_at   | Transcribed locus                                                                                         | ---                                   | 1.7           | 6.67E-05    | 0.051799469 |
| 1372515_at   | Transcribed locus                                                                                         | ---                                   | 1.4           | 7.99E-05    | 0.054591631 |
| 1393477_at   | ---                                                                                                       | ---                                   | 1.5           | 9.34E-05    | 0.056951495 |
| 1377458_at   | sortilin-related receptor, LDLR class A repeats-containing                                                | Sort1                                 | 1.3           | 0.000109667 | 0.060429896 |
| 1387934_at   | brevican                                                                                                  | Bcan                                  | 1.5           | 0.000138977 | 0.060484027 |
| 1379918_at   | ---                                                                                                       | ---                                   | 1.4           | 0.000145916 | 0.060484027 |
| 1375946_at   | Transcribed locus                                                                                         | ---                                   | 1.3           | 0.000151334 | 0.060484027 |
| 1399063_at   | ZUBR1                                                                                                     | Rbaf600                               | 1.4           | 0.000165181 | 0.060484027 |
| 1386941_at   | plectin 1                                                                                                 | Plec1                                 | 1.3           | 0.000172174 | 0.060484027 |
| 1367707_at   | fatty acid synthase                                                                                       | Fasn                                  | 1.4           | 0.000184671 | 0.060484027 |
| 1398791_at   | thioredoxin reductase 1                                                                                   | Txnrd1                                | 1.4           | 0.000189395 | 0.060484027 |
| 1371023_at   | EGF-like-domain, multiple 4                                                                               | Egfl4                                 | 1.4           | 0.000200363 | 0.060484027 |
| 1388808_at   | polymerase (RNA) II (DNA directed) polypeptide A                                                          | Polr2a                                | 1.4           | 0.000206835 | 0.060484027 |
| 1377061_at   | RhoGAP involved in beta-catenin-N-cadherin and NMDA receptor signaling (predicted)                        | RICS_predicted                        | 1.4           | 0.000221395 | 0.060484027 |
| 1387154_at   | neuropeptide Y                                                                                            | Npy                                   | 1.9           | 0.000240474 | 0.060484027 |
| 1368036_at   | protein tyrosine phosphatase, receptor type, F                                                            | Ptprf                                 | 1.3           | 0.000244316 | 0.060484027 |
| 1381063_at   | adenylate cyclase 9 (predicted)                                                                           | Adcy9_predicted                       | 1.3           | 0.000271716 | 0.061369734 |
| 1387367_at   | golgi apparatus protein 1                                                                                 | Glg1                                  | 1.3           | 0.000273333 | 0.061369734 |
| 1374910_at   | cadherin EGF LAG seven-pass G-type receptor 2                                                             | Celsr2                                | 1.5           | 0.000278571 | 0.061369734 |
| 1387924_at   | neuronal guanine nucleotide exchange factor                                                               | Ngef                                  | 1.4           | 0.000287989 | 0.061369734 |
| 1374191_at   | rhomboid family 1 (Drosophila)                                                                            | Rhbdf1                                | 1.4           | 0.000306245 | 0.061438374 |
| 1368005_at   | inositol 1,4,5-triphosphate receptor 3                                                                    | Itpr3                                 | 1.4           | 0.000316108 | 0.061438374 |
| 1387109_at   | P450 (cytochrome) oxidoreductase                                                                          | Por                                   | 1.3           | 0.00033466  | 0.062137848 |
| 1368347_at   | procollagen, type V, alpha 3                                                                              | Col5a3                                | 1.4           | 0.000351122 | 0.062681954 |
| 1385525_at   | similar to C-type lectin-like receptor 2 (predicted)                                                      | RGD1563517_predicted                  | 1.8           | 0.000363911 | 0.062681954 |
| 1379324_at   | Transcribed locus                                                                                         | ---                                   | 1.4           | 0.000372034 | 0.062681954 |
| 1386929_at   | hexokinase 1                                                                                              | Hk1                                   | 1.5           | 0.000372364 | 0.062681954 |
| 1390710_x_at | sortilin-related receptor, LDLR class A repeats-containing                                                | Sort1                                 | 1.3           | 0.00039997  | 0.063382433 |
| 1383620_at   | ---                                                                                                       | ---                                   | 1.3           | 0.000409741 | 0.063629048 |
| 1373751_at   | Transcribed locus                                                                                         | ---                                   | 1.3           | 0.000414477 | 0.063711755 |
| 1398445_at   | Transcribed locus                                                                                         | ---                                   | 1.4           | 0.0004445   | 0.064896995 |
| 1391032_at   | seizure related 6 homolog (mouse)                                                                         | Sez6                                  | 1.3           | 0.000455109 | 0.064970017 |
| 1376768_at   | Transcribed locus                                                                                         | ---                                   | 1.3           | 0.000470121 | 0.065894944 |
| 1388464_at   | similar to cullin 7                                                                                       | LOC680835 ///<br>LOC682940            | 1.4           | 0.000499194 | 0.067677153 |
| 1367963_at   | G protein beta subunit-like                                                                               | Gbl                                   | 1.3           | 0.000507123 | 0.067677153 |
| 1371429_at   | dystroglycan 1                                                                                            | Dag1                                  | 1.4           | 0.000529007 | 0.068488178 |
| 1392534_at   | transmembrane, prostate androgen induced RNA (predicted)                                                  | Tmpai_predicted                       | 1.4           | 0.000529237 | 0.068488178 |
| 1390815_at   | cyclin M1 (predicted)                                                                                     | Cnm1_predicted                        | 1.3           | 0.000529238 | 0.068488178 |
| 1382203_at   | longevity assurance homolog 1 (S. cerevisiae) (predicted) /// growth differentiation factor 1 (predicted) | Gdf1_predicted ///<br>Lass1_predicted | 1.3           | 0.00055587  | 0.069012738 |
| 1371910_at   | Transcribed locus                                                                                         | ---                                   | 1.4           | 0.000558215 | 0.069012738 |
| 1386957_at   | nuclear pore membrane glycoprotein 121                                                                    | Pom121                                | 1.3           | 0.000565297 | 0.069012738 |
| 1391856_at   | sema domain, immunoglobulin domain (Ig), short basic domain, secreted, (semaphorin) 3G                    | Sema3g                                | 1.5           | 0.000573304 | 0.069012738 |
| 1389809_at   | Transcribed locus                                                                                         | ---                                   | 1.3           | 0.000620774 | 0.069012738 |
| 1392593_a_at | similar to KIAA1205 protein (predicted)                                                                   | RGD1309896_predicted                  | 1.3           | 0.000658534 | 0.069012738 |

|              |                                                                                                                                                                    |                               |     |             |             |
|--------------|--------------------------------------------------------------------------------------------------------------------------------------------------------------------|-------------------------------|-----|-------------|-------------|
| 1372441_at   | chromodomain helicase DNA binding protein 4                                                                                                                        | Chd4                          | 1.3 | 0.00068437  | 0.069198114 |
| 1372196_at   | nuclear receptor co-repressor 2 (predicted)                                                                                                                        | Ncor2_predicted               | 1.3 | 0.000684608 | 0.069198114 |
| 1392786_at   | dysferlin (predicted)                                                                                                                                              | Dysf_predicted                | 1.3 | 0.000692004 | 0.069376603 |
| 1389522_at   | pleckstrin homology domain containing, family A member 6 (predicted)                                                                                               | Plekha6_predicted             | 1.4 | 0.000701967 | 0.069439606 |
| 1382123_at   | ---                                                                                                                                                                | ---                           | 1.4 | 0.000729405 | 0.069459846 |
| 1367801_at   | endothelin converting enzyme 1                                                                                                                                     | Ece1                          | 1.3 | 0.000740059 | 0.069459846 |
| 1394982_at   | Similar to 1200003M09Rik protein (predicted)                                                                                                                       | RGD1305553_predicted          | 1.3 | 0.000745101 | 0.069550925 |
| 1375793_at   | myeloid/lymphoid or mixed-lineage leukemia                                                                                                                         | Mll                           | 1.3 | 0.00076797  | 0.069652105 |
| 1378148_at   | Transcribed locus                                                                                                                                                  | ---                           | 1.4 | 0.000774929 | 0.069652105 |
| 1374030_at   | similar to KIAA0999 protein                                                                                                                                        | LOC684112                     | 1.3 | 0.000847756 | 0.0739693   |
| 1392187_at   | Transcribed locus                                                                                                                                                  | ---                           | 1.3 | 0.000854135 | 0.0739693   |
| 1397685_at   | Transcribed locus                                                                                                                                                  | ---                           | 1.3 | 0.000855003 | 0.0739693   |
| 1368914_at   | runt related transcription factor 1                                                                                                                                | Runx1                         | 1.3 | 0.000868673 | 0.074076268 |
| 1373551_at   | similar to KIAA0614 protein (predicted)                                                                                                                            | RGD1309762_predicted          | 1.3 | 0.000878007 | 0.074076268 |
| 1383215_at   | similar to TPR repeat-containing protein KIAA1043                                                                                                                  | LOC304558                     | 1.3 | 0.000880686 | 0.074076268 |
| 1368710_at   | MAP/microtubule affinity-regulating kinase 2                                                                                                                       | Mark2                         | 1.3 | 0.000881363 | 0.074076268 |
| 1370199_at   | nucleobindin 1                                                                                                                                                     | Nucb1                         | 1.4 | 0.000901324 | 0.074182573 |
| 1367882_at   | microtubule-associated protein 1 A                                                                                                                                 | Mtap1a                        | 1.3 | 0.000921305 | 0.075075244 |
| 1379389_at   | Neural cell adhesion molecule 1                                                                                                                                    | Ncam1                         | 1.3 | 0.000924187 | 0.075075244 |
| 1377926_at   | Centaurin, gamma 2 (predicted)                                                                                                                                     | Centg2_predicted              | 1.3 | 0.000951153 | 0.075265191 |
| 1389787_at   | PTK7 protein tyrosine kinase 7 (predicted)                                                                                                                         | Ptk7_predicted                | 1.4 | 0.000968033 | 0.075265191 |
| 1368137_at   | microtubule-associated protein tau                                                                                                                                 | Mapt                          | 1.4 | 0.000969344 | 0.075265191 |
| 1398299_at   | Rho guanine nucleotide exchange factor (GEF) 11                                                                                                                    | Arhgef11                      | 1.3 | 0.000986027 | 0.075530525 |
| 1379847_at   | dysferlin (predicted)                                                                                                                                              | Dysf_predicted                | 1.4 | 0.001015693 | 0.076331462 |
| 1372055_at   | similar to P-Rex1 (predicted)                                                                                                                                      | RGD1306534_predicted          | 1.3 | 0.001027832 | 0.076489501 |
| 1372728_at   | Sortilin 1                                                                                                                                                         | Sort1                         | 1.2 | 0.001031771 | 0.076489501 |
| 1367636_at   | insulin-like growth factor 2 receptor                                                                                                                              | Igf2r                         | 1.2 | 0.001052247 | 0.076489501 |
| 1376303_a_at | membralin                                                                                                                                                          | RGD1311136                    | 1.3 | 0.001069337 | 0.076489501 |
| 1390214_a_at | CDKN1A interacting zinc finger protein 1 (predicted)                                                                                                               | Ciz1_predicted                | 1.3 | 0.001078116 | 0.076489501 |
| 1373541_at   | Rho guanine nucleotide exchange factor (GEF) 17 (predicted)                                                                                                        | Arhgef17_predicted            | 1.3 | 0.001095607 | 0.076489501 |
| 1383092_a_at | similar to mKIAA0023 protein (predicted)                                                                                                                           | RGD1304977_predicted          | 1.3 | 0.001097057 | 0.076489501 |
| 1383418_at   | a disintegrin and metallopeptidase domain 11 (predicted)                                                                                                           | Adam11_predicted              | 1.3 | 0.001128081 | 0.076887011 |
| 1392746_x_at | La ribonucleoprotein domain family, member 1 (predicted)                                                                                                           | Larp1_predicted               | 1.4 | 0.001147467 | 0.076887011 |
| 1385967_at   | forkhead box K2 (predicted) /// similar to forkhead box K2 isoform 1                                                                                               | Foxk2_predicted /// LOC688330 | 1.3 | 0.001155932 | 0.076887011 |
| 1377103_at   | midnolin (predicted)                                                                                                                                               | Midn_predicted                | 1.3 | 0.001165415 | 0.076887011 |
| 1387175_a_at | HLA-B-associated transcript 3                                                                                                                                      | Bat3                          | 1.3 | 0.001180668 | 0.076887011 |
| 1370648_a_at | SH3 domain binding protein CR16                                                                                                                                    | Cr16                          | 1.3 | 0.001183777 | 0.076887011 |
| 1369562_at   | hippocalcin-like 1                                                                                                                                                 | Hpcal1                        | 1.8 | 0.001202064 | 0.077473761 |
| 1387913_at   | cytochrome P450, family 2, subfamily d, polypeptide 22                                                                                                             | Cyp2d22                       | 1.3 | 0.001206417 | 0.077473761 |
| 1368438_at   | phosphodiesterase 10A                                                                                                                                              | Pde10a                        | 1.5 | 0.001235867 | 0.077760255 |
| 1369777_a_at | SH3/ankyrin domain gene 2                                                                                                                                          | Shank2                        | 1.2 | 0.001255962 | 0.077760255 |
| 1369158_at   | calcium-sensing receptor                                                                                                                                           | Casr                          | 1.4 | 0.001271148 | 0.077760255 |
| 1390179_at   | ankyrin repeat domain 52 (predicted)                                                                                                                               | Ankrd52_predicted             | 1.3 | 0.001275086 | 0.077760255 |
| 1378610_at   | polyhomeotic like 3 (Drosophila) (predicted)                                                                                                                       | Phc3_predicted                | 1.3 | 0.001305742 | 0.077760255 |
| 1389400_at   | SPEN homolog, transcriptional regulator (Drosophila) (predicted) /// similar to Msx2-interacting protein (SPEN homolog) (SMART/HDAC1-associated repressor protein) | LOC690911 /// Spen_predicted  | 1.3 | 0.001309416 | 0.077760255 |
| 1368267_at   | protein-O-mannosyltransferase 1                                                                                                                                    | Pomt1                         | 1.3 | 0.001317724 | 0.077760255 |
| 1390563_at   | ATP-binding cassette, sub-family A (ABC1), member 3                                                                                                                | Abca3                         | 1.3 | 0.001336944 | 0.077760255 |
| 1388240_a_at | integrin alpha 7                                                                                                                                                   | Iitga7                        | 1.4 | 0.001364084 | 0.077760255 |
| 1384959_at   | Transcribed locus                                                                                                                                                  | ---                           | 1.2 | 0.001364612 | 0.077760255 |
| 1382995_at   | Neuropilin 2                                                                                                                                                       | Nrp2                          | 1.2 | 0.001372309 | 0.077760255 |

|              |                                                                                                                     |                      |     |             |             |
|--------------|---------------------------------------------------------------------------------------------------------------------|----------------------|-----|-------------|-------------|
| 1390083_at   | Retinitis pigmentosa 9 homolog (human) (predicted)                                                                  | Rp9h_predicted       | 1.3 | 0.001377725 | 0.077760255 |
| 1368472_at   | cadherin EGF LAG seven-pass G-type receptor 3                                                                       | Celsr3               | 1.3 | 0.001380476 | 0.077760255 |
| 1375451_at   | pecanex-like 3 (Drosophila)                                                                                         | Pcnx13               | 1.3 | 0.001394837 | 0.077760255 |
| 1368303_at   | period homolog 2 (Drosophila)                                                                                       | Per2                 | 1.3 | 0.001397518 | 0.077760255 |
| 1386956_at   | scavenger receptor class B, member 1                                                                                | Scarb1               | 1.3 | 0.001413359 | 0.078056888 |
| 1394605_at   | similar to cDNA sequence BC017647 (predicted)                                                                       | RGD1566149_predicted | 1.2 | 0.001426363 | 0.078093392 |
| 1376928_at   | Similar to A disintegrin-like and metalloprotease (reprolysin type) with thrombospondin type 1 motif, 2 (predicted) | RGD1565950_predicted | 1.3 | 0.001431577 | 0.078128436 |
| 1375983_at   | MAM domain containing 2                                                                                             | Mamdc2               | 1.3 | 0.001469184 | 0.079661954 |
| 1388452_at   | Transcribed locus, strongly similar to XP_579967.1 hypothetical protein XP_579967 [Rattus norvegicus]               | ---                  | 1.3 | 0.001473667 | 0.079661954 |
| 1388193_at   | huntingtin interacting protein 1                                                                                    | Hip1                 | 1.3 | 0.001490663 | 0.079890524 |
| 1374246_at   | Transcribed locus                                                                                                   | ---                  | 1.2 | 0.001497287 | 0.079890524 |
| 1372943_at   | similar to Ubiquitin-associated protein 2-like                                                                      | LOC497952            | 1.3 | 0.001497991 | 0.079890524 |
| 1371018_at   | cadherin EGF LAG seven-pass G-type receptor 2                                                                       | Celsr2               | 1.3 | 0.00150128  | 0.079890524 |
| 1375212_at   | ankyrin repeat domain 52 (predicted)                                                                                | Ankrd52_predicted    | 1.3 | 0.001523059 | 0.080458803 |
| 1381685_a_at | similar to CG12753-PA (predicted)                                                                                   | RGD1305773_predicted | 1.2 | 0.001544419 | 0.080458803 |
| 1376911_at   | Transcribed locus                                                                                                   | ---                  | 1.3 | 0.001550022 | 0.080458803 |
| 1368292_at   | dynamin 1                                                                                                           | Dnm1                 | 1.3 | 0.001557029 | 0.080458803 |
| 1387729_at   | gamma-glutamyltransferase-like activity 1                                                                           | Ggtla1               | 1.3 | 0.001576014 | 0.080458803 |
| 1389376_at   | Transcribed locus                                                                                                   | ---                  | 1.3 | 0.001576906 | 0.080458803 |
| 1368352_at   | syntaxin 1B2                                                                                                        | Stx1b2               | 1.3 | 0.001586271 | 0.080458803 |
| 1370355_at   | stearoyl-Coenzyme A desaturase 1                                                                                    | Scd1                 | 1.4 | 0.001588115 | 0.080458803 |
| 1370231_at   | general transcription factor III C 1                                                                                | Gtf3c1               | 1.3 | 0.00160368  | 0.080458803 |
| 1389844_at   | FK506 binding protein 4                                                                                             | Fkbp4                | 1.4 | 0.001644734 | 0.081884988 |
| 1379591_at   | ---                                                                                                                 | ---                  | 1.2 | 0.001678694 | 0.082142371 |
| 1369249_at   | progressive ankylosis homolog (mouse)                                                                               | Ank                  | 1.3 | 0.001687857 | 0.082142371 |
| 1390113_a_at | La ribonucleoprotein domain family, member 1 (predicted)                                                            | Larp1_predicted      | 1.3 | 0.001737155 | 0.08335993  |
| 1368359_a_at | VGF nerve growth factor inducible                                                                                   | Vgf                  | 1.3 | 0.001737275 | 0.08335993  |
| 1383318_at   | Transcribed locus                                                                                                   | ---                  | 1.3 | 0.001758944 | 0.083561954 |
| 1383331_at   | Transcribed locus                                                                                                   | ---                  | 1.9 | 0.001765747 | 0.083561954 |
| 1368047_at   | solute carrier family 13 (sodium-dependent dicarboxylate transporter), member 3                                     | Slc13a3              | 1.3 | 0.001765945 | 0.083561954 |
| 1374089_at   | Transcribed locus                                                                                                   | ---                  | 1.4 | 0.001787442 | 0.083605912 |
| 1388426_at   | sterol regulatory element binding factor 1                                                                          | Srebf1               | 1.2 | 0.001804221 | 0.083605912 |
| 1368183_at   | phospholipase C, gamma 1                                                                                            | Plcg1                | 1.2 | 0.001820189 | 0.083605912 |
| 1379536_at   | pleckstrin homology domain containing, family A member 6 (predicted)                                                | Plekha6_predicted    | 1.2 | 0.001853098 | 0.083605912 |
| 1373900_at   | keratin complex 2, basic, gene 7                                                                                    | Krt2-7               | 1.4 | 0.001853478 | 0.083605912 |
| 1370264_at   | CPG2 protein                                                                                                        | CPG2                 | 1.3 | 0.001860414 | 0.083605912 |
| 1370362_at   | protein tyrosine phosphatase, receptor type, N                                                                      | Ptprn                | 1.3 | 0.001872453 | 0.083605912 |
| 1398458_at   | similar to protein kinase, lysine deficient 1; kinase deficient protein (predicted)                                 | RGD1307284_predicted | 1.3 | 0.001874067 | 0.083605912 |
| 1371781_at   | signal transducer and activator of transcription 3                                                                  | Stat3                | 1.5 | 0.001879329 | 0.083605912 |
| 1367708_a_at | fatty acid synthase                                                                                                 | Fasn                 | 1.3 | 0.001883092 | 0.083605912 |
| 1385716_at   | Hypothetical protein LOC679624                                                                                      | LOC679624            | 1.3 | 0.001891543 | 0.083605912 |
| 1389769_at   | ---                                                                                                                 | ---                  | 1.2 | 0.001902118 | 0.08362479  |
| 1388478_at   | transducin (beta)-like 1 X-linked (predicted)                                                                       | Tbl1x_predicted      | 1.3 | 0.001907869 | 0.08362479  |
| 1372048_at   | podocalyxin-like 2 (predicted)                                                                                      | Podxl2_predicted     | 1.3 | 0.001945617 | 0.084352863 |
| 1384264_at   | myosin, heavy polypeptide 14                                                                                        | Myh14                | 1.3 | 0.001958792 | 0.084516929 |
| 1398862_at   | ATPase, Ca++ transporting, cardiac muscle, slow twitch 2                                                            | Atp2a2               | 1.3 | 0.001979164 | 0.084533769 |
| 1371569_at   | Transcribed locus                                                                                                   | ---                  | 1.3 | 0.001980877 | 0.084533769 |
| 1376205_at   | Transcribed locus                                                                                                   | ---                  | 1.2 | 0.001996086 | 0.0846852   |
| 1391863_at   | Transcribed locus                                                                                                   | ---                  | 1.5 | 0.002056214 | 0.085882478 |
| 1392238_at   | Transcribed locus                                                                                                   | ---                  | 1.3 | 0.002073471 | 0.085968527 |
| 1372063_at   | Similar to novel protein of unknown function (DUF423) family member (predicted)                                     | RGD1563438_predicted | 1.3 | 0.00213855  | 0.087394051 |
| 1367949_at   | proenkephalin 1                                                                                                     | Penk1                | 1.3 | 0.002156044 | 0.087898676 |

|              |                                                                                                   |                      |     |             |             |
|--------------|---------------------------------------------------------------------------------------------------|----------------------|-----|-------------|-------------|
| 1395642_at   | nucleolar protein 9                                                                               | Nol9                 | 1.2 | 0.002166618 | 0.08796992  |
| 1378628_at   | Transcribed locus                                                                                 | ---                  | 1.4 | 0.002168091 | 0.08796992  |
| 1373855_at   | Transcribed locus                                                                                 | ---                  | 1.3 | 0.002173514 | 0.087980946 |
| 1375049_at   | ---                                                                                               | ---                  | 1.3 | 0.002196743 | 0.088340206 |
| 1381346_at   | Transcribed locus                                                                                 | ---                  | 1.3 | 0.002216856 | 0.088892787 |
| 1373245_at   | procollagen, type IV, alpha 1                                                                     | Col4a1               | 1.4 | 0.002236789 | 0.089149533 |
| 1375433_at   | Dispatched homolog 2 (Drosophila) (predicted)                                                     | Disp2_predicted      | 1.3 | 0.00227302  | 0.089464804 |
| 1386958_at   | thioredoxin reductase 1                                                                           | Txnrd1               | 1.2 | 0.002307385 | 0.089988014 |
| 1376584_at   | Transcribed locus                                                                                 | ---                  | 1.3 | 0.002355904 | 0.090683187 |
| 1387874_at   | D site albumin promoter binding protein                                                           | Dbp                  | 1.4 | 0.002395687 | 0.091144684 |
| 1379743_at   | Nucleotide binding protein 2                                                                      | Nubp2                | 1.8 | 0.002398294 | 0.091144684 |
| 1392215_at   | Eph receptor B1                                                                                   | Ephb1                | 1.2 | 0.002427504 | 0.091740327 |
| 1388932_at   | laminin, alpha 5                                                                                  | Lama5                | 1.3 | 0.002442582 | 0.091899558 |
| 1387009_at   | calpain 1                                                                                         | Capn1                | 1.3 | 0.002488514 | 0.09261177  |
| 1368641_at   | wingless-related MMTV integration site 4                                                          | Wnt4                 | 1.4 | 0.002498766 | 0.092791124 |
| 1374655_at   | Transcribed locus                                                                                 | ---                  | 1.3 | 0.002513866 | 0.092947745 |
| 1368483_a_at | slit homolog 1 (Drosophila)                                                                       | Slit1                | 1.3 | 0.002519918 | 0.092970268 |
| 1381460_at   | ---                                                                                               | ---                  | 1.3 | 0.002555734 | 0.093602564 |
| 1383337_at   | Similar to genetic suppressor element 1 (predicted)                                               | RGD1562686_predicted | 1.3 | 0.002558974 | 0.093602564 |
| 1377618_at   | Kruppel-like factor 7 (ubiquitous) (predicted)                                                    | Klf7_predicted       | 1.4 | 0.002606679 | 0.094904798 |
| 1390409_at   | LOC361774 (predicted)                                                                             | RGD1306116_predicted | 1.2 | 0.002611243 | 0.094904798 |
| 1371558_at   | nischarin                                                                                         | Nisch                | 1.3 | 0.002645093 | 0.095391055 |
| 1376095_at   | Transcribed locus                                                                                 | ---                  | 1.2 | 0.002667436 | 0.095499738 |
| 1371874_at   | ubiquitin specific protease 19                                                                    | Usp19                | 1.3 | 0.002672338 | 0.095499738 |
| 1396920_at   | G protein-coupled receptor 176                                                                    | Gpr176               | 1.3 | 0.002695947 | 0.095518141 |
| 1372222_at   | Similar to hypothetical protein F730001J03 (predicted)                                            | RGD1311757_predicted | 1.2 | 0.002706203 | 0.095518141 |
| 1375417_at   | protein kinase C binding protein 1                                                                | Prkcbp1              | 1.2 | 0.00270633  | 0.095518141 |
| 1373190_at   | CCR4-NOT transcription complex, subunit 4                                                         | Cnot4                | 1.2 | 0.002734781 | 0.095833195 |
| 1394179_s_at | Transcribed locus                                                                                 | ---                  | 1.3 | 0.002737724 | 0.095833195 |
| 1389637_at   | Similar to WW domain binding protein 2                                                            | LOC688642            | 1.4 | 0.002740052 | 0.095833195 |
| 1383963_at   | Transcribed locus                                                                                 | ---                  | 1.2 | 0.002751518 | 0.095833195 |
| 1384316_at   | Transcribed locus                                                                                 | ---                  | 1.2 | 0.002760211 | 0.095833195 |
| 1371923_at   | acyltransferase like 2 (predicted)                                                                | Aylt2_predicted      | 1.2 | 0.002775193 | 0.096048203 |
| 1373422_at   | La ribonucleoprotein domain family, member 1 (predicted)                                          | Larp1_predicted      | 1.2 | 0.002810554 | 0.096058869 |
| 1370599_a_at | protein tyrosine phosphatase, receptor type, D                                                    | Ptprd                | 1.3 | 0.002816419 | 0.096058869 |
| 1372966_at   | hypothetical LOC298504 (predicted)                                                                | RGD1310174_predicted | 1.3 | 0.002820812 | 0.096058869 |
| 1377693_at   | FERM and PDZ domain containing 1 (predicted)                                                      | Frmppd1_predicted    | 1.2 | 0.002825639 | 0.096058869 |
| 1371797_at   | carbaryl phosphatate synthetase 2                                                                 | Cad                  | 1.2 | 0.002832024 | 0.096058869 |
| 1374262_at   | Transcribed locus                                                                                 | ---                  | 1.2 | 0.002842527 | 0.096058869 |
| 1373565_at   | SWI/SNF related, matrix associated, actin dependent regulator of chromatin, subfamily a, member 4 | Smarca4              | 1.2 | 0.002867983 | 0.096058869 |
| 1374641_at   | Transcribed locus                                                                                 | ---                  | 1.2 | 0.002871559 | 0.096058869 |
| 1389679_at   | similar to testhymin (predicted)                                                                  | RGD1563612_predicted | 1.4 | 0.002879179 | 0.096058869 |
| 1384302_at   | solute carrier family 6 (neurotransmitter transporter), member 17                                 | Slc6a17              | 1.7 | 0.002896553 | 0.09627783  |
| 1394705_at   | Transcribed locus                                                                                 | ---                  | 1.3 | 0.002900753 | 0.09627783  |
| 1372937_at   | Transcribed locus                                                                                 | ---                  | 1.2 | 0.002906757 | 0.09627783  |
| 1373315_at   | Aryl hydrocarbon receptor nuclear translocator 2                                                  | Arnt2                | 1.3 | 0.002938292 | 0.09627783  |
| 1374496_at   | similar to RIKEN cDNA 1200009O22; EST AI316813                                                    | RGD1310827           | 1.3 | 0.002945702 | 0.09627783  |
| 1394078_at   | ---                                                                                               | ---                  | 1.3 | 0.002962938 | 0.09627783  |
| 1388951_at   | similar to Trithorax homolog 2 (Mixed lineage leukemia gene homolog 2 protein) (predicted)        | RGD1308331_predicted | 1.3 | 0.002978719 | 0.09627783  |
| 1383135_at   | Neurotrophic tyrosine kinase, receptor, type 2                                                    | Ntrk2                | 1.3 | 0.002991103 | 0.09627783  |
| 1384771_at   | ---                                                                                               | ---                  | 1.2 | 0.002995933 | 0.09627783  |
| 1369722_a_at | xylosyltransferase II                                                                             | Xylt2                | 1.2 | 0.003001512 | 0.09627783  |
| 1376233_at   | Discs, large (Drosophila) homolog-associated protein 3                                            | Dlgap3               | 1.2 | 0.003009739 | 0.09627783  |

|              |                                                                                                                  |                      |     |             |             |
|--------------|------------------------------------------------------------------------------------------------------------------|----------------------|-----|-------------|-------------|
| 1385442_at   | Transcribed locus                                                                                                | ---                  | 1.3 | 0.003039757 | 0.096962183 |
| 1373793_at   | immunoglobulin superfamily, member 8                                                                             | Igsf8                | 1.2 | 0.003102831 | 0.097459196 |
| 1367511_at   | nicastrin                                                                                                        | Ncstn                | 1.3 | 0.003134056 | 0.097459196 |
| 1374419_at   | adenylate cyclase 9 (predicted)                                                                                  | Adcy9_predicted      | 1.3 | 0.003152172 | 0.097459196 |
| 1372095_at   | similar to KIAA1161 protein (predicted)                                                                          | RGD1309821_predicted | 1.3 | 0.003198632 | 0.097873471 |
| 1377121_at   | discs, large homolog 5 (Drosophila) (predicted)                                                                  | Dlg5_predicted       | 1.2 | 0.003216822 | 0.098124556 |
| 1389341_at   | plexin D1 (predicted)                                                                                            | Plxnd1_predicted     | 1.2 | 0.003282282 | 0.098971977 |
| 1368238_at   | pancreatitis-associated protein                                                                                  | Pap                  | 1.2 | 0.003409729 | 0.10043969  |
| 1377821_at   | Transcribed locus                                                                                                | ---                  | 1.3 | 0.003410873 | 0.10043969  |
| 1375994_at   | Neurofibromatosis 1                                                                                              | Nf1                  | 1.2 | 0.003464795 | 0.10043969  |
| 1375096_at   | stratifin (predicted)                                                                                            | Sfn_predicted        | 1.2 | 0.003469567 | 0.10043969  |
| 1388609_at   | Similar to RIKEN cDNA 1700027M01                                                                                 | RGD1311815           | 1.2 | 0.00347154  | 0.10043969  |
| 1394957_at   | nischarin                                                                                                        | Nisch                | 1.4 | 0.003520337 | 0.101066225 |
| 1391672_at   | Transcribed locus                                                                                                | ---                  | 1.2 | 0.003534263 | 0.101277209 |
| 1372875_at   | Transcribed locus                                                                                                | ---                  | 1.3 | 0.003565843 | 0.101391987 |
| 1376733_at   | immunoglobulin superfamily, member 11                                                                            | Igsf11               | 1.3 | 0.003573432 | 0.101391987 |
| 1379906_at   | ATPase, Na+/K+ transporting, beta 2 polypeptide                                                                  | Atp1b2               | 1.3 | 0.003617825 | 0.101907022 |
| 1378414_at   | Transcribed locus, strongly similar to XP_230530.3 similar to hypothetical protein [Rattus norvegicus]           | ---                  | 1.2 | 0.003619822 | 0.101907022 |
| 1374135_at   | importin 4 (predicted)                                                                                           | Ipo4_predicted       | 1.3 | 0.003624553 | 0.101907022 |
| 1387061_at   | junction plakoglobin                                                                                             | Jup                  | 1.3 | 0.003633145 | 0.101907022 |
| 1398415_at   | Transcribed locus                                                                                                | ---                  | 1.2 | 0.003677214 | 0.102267664 |
| 1369678_a_at | nuclear factor I/A                                                                                               | Nfia                 | 1.3 | 0.003685127 | 0.102267664 |
| 1376182_at   | Transcribed locus, weakly similar to NP_066564.1 general control of amino-acid synthesis 5-like 2 [Homo sapiens] | ---                  | 1.2 | 0.003692444 | 0.102267664 |
| 1371383_at   | Dr1 associated protein 1 (negative cofactor 2 alpha) (predicted)                                                 | Drap1_predicted      | 1.4 | 0.003709557 | 0.102267664 |
| 1371250_at   | chemokine (C-X-C motif) ligand 4                                                                                 | Cxcl4                | 1.8 | 0.003734276 | 0.102371868 |
| 1384138_at   | Transcribed locus                                                                                                | ---                  | 1.3 | 0.00374589  | 0.102371868 |
| 1373187_at   | Transcribed locus                                                                                                | ---                  | 1.3 | 0.003747407 | 0.102371868 |
| 1390026_at   | Bcl2-associated athanogene 3                                                                                     | Bag3                 | 1.2 | 0.003767569 | 0.102371868 |
| 1383564_at   | interferon regulatory factor 7                                                                                   | Irf7                 | 1.2 | 0.003773645 | 0.102371868 |
| 1387813_at   | v-erb-b2 erythroblastic leukemia viral oncogene homolog 2, neuro/glioblastoma derived oncogene homolog (avian)   | ErbB2                | 1.3 | 0.003794216 | 0.102371868 |
| 1389002_at   | talin 1                                                                                                          | Tln1                 | 1.3 | 0.003812505 | 0.102371868 |
| 1371473_at   | cleft lip and palate associated transmembrane protein 1 (predicted)                                              | Ciptm1_predicted     | 1.3 | 0.003831387 | 0.102371868 |
| 1374593_at   | protein kinase C, epsilon                                                                                        | Prkce                | 1.2 | 0.003835499 | 0.102371868 |
| 1383229_at   | ATP-binding cassette, sub-family A (ABC1), member 7                                                              | Abca7                | 1.2 | 0.003847424 | 0.10243669  |
| 1376025_at   | HMT1 hnRNP methyltransferase-like 1 (S. cerevisiae)                                                              | Hrmt111              | 1.3 | 0.003873734 | 0.102461219 |
| 1391688_at   | Transcribed locus                                                                                                | ---                  | 1.2 | 0.003876702 | 0.102461219 |
| 1375699_at   | Transcribed locus                                                                                                | ---                  | 1.2 | 0.003880339 | 0.102461219 |
| 1367852_s_at | glycoprotein Ib, beta polypeptide /// septin 5                                                                   | Gp1bb /// Sept5      | 1.3 | 0.003914541 | 0.102525381 |
| 1372351_at   | bromodomain containing 4                                                                                         | Brd4                 | 1.2 | 0.003993916 | 0.103684001 |

supplementary table 2

Supplementary table 2: Probe sets identified as down-regulated 10% FDR ( $p < 0.004$ ) and  $> 1.2$  fold in the L4+L5 DRGs of gp120+ddC animals

| Probe set ID | Gene Title                                                                                                  | Gene Symbol                                                       | Fold increase | p value     | FDR value   |
|--------------|-------------------------------------------------------------------------------------------------------------|-------------------------------------------------------------------|---------------|-------------|-------------|
| 1390706_at   | spectrin beta 2                                                                                             | Spnb2                                                             | 0.4           | 2.05E-06    | 0.021095388 |
| 1380447_a_at | mitochondrial ribosomal protein S18C (predicted)                                                            | Mrps18c_predicted                                                 | 0.6           | 2.47E-06    | 0.021095388 |
| 1374974_at   | Transcribed locus                                                                                           | ---                                                               | 0.5           | 5.50E-06    | 0.031340167 |
| 1373347_at   | acyl-Coenzyme A binding domain containing 3                                                                 | Acbd3                                                             | 0.6           | 9.72E-06    | 0.035179964 |
| 1394600_at   | Transcribed locus                                                                                           | ---                                                               | 0.5           | 2.01E-05    | 0.051799469 |
| 1379715_at   | similar to CG9346-PA (predicted)                                                                            | RGD1307882_predicted                                              | 0.5           | 2.45E-05    | 0.051799469 |
| 1377694_at   | Similar to cisplatin resistance-associated overexpressed protein (predicted)                                | RGD1307981_predicted                                              | 0.6           | 2.85E-05    | 0.051799469 |
| 1382466_at   | similar to RIKEN cDNA 6530403A03                                                                            | RGD1309020                                                        | 0.6           | 3.87E-05    | 0.051799469 |
| 1391170_at   | similar to mKIAA1757 protein (predicted)                                                                    | RGD1310433_predicted                                              | 0.4           | 4.91E-05    | 0.051799469 |
| 1377728_at   | RGD1565641 (predicted)                                                                                      | RGD1565641_predicted                                              | 0.7           | 4.99E-05    | 0.051799469 |
| 1375442_at   | M-phase phosphoprotein 10 (U3 small nucleolar ribonucleoprotein) (predicted)                                | Mphosph10_predicted                                               | 0.5           | 5.03E-05    | 0.051799469 |
| 1372543_at   | similar to RIKEN cDNA 2610029G23 (predicted)                                                                | RGD1562502_predicted                                              | 0.7           | 5.72E-05    | 0.051799469 |
| 1389444_at   | Similar to RIKEN cDNA 5033406L14                                                                            | RGD1305755                                                        | 0.6           | 5.94E-05    | 0.051799469 |
| 1382632_at   | roundabout homolog 2 (Drosophila)                                                                           | Robo2                                                             | 0.6           | 6.36E-05    | 0.051799469 |
| 1383343_at   | similar to reduced expression 2                                                                             | LOC690559                                                         | 0.7           | 6.37E-05    | 0.051799469 |
| 1376096_a_at | Transcribed locus                                                                                           | ---                                                               | 0.7           | 6.41E-05    | 0.051799469 |
| 1385250_at   | chromodomain helicase DNA binding protein 6 (predicted)                                                     | Chd6_predicted                                                    | 0.7           | 7.20E-05    | 0.053477666 |
| 1377262_at   | similar to KIAA2010 protein (predicted)                                                                     | RGD1309450_predicted                                              | 0.5           | 7.72E-05    | 0.054591631 |
| 1384339_s_at | casein kinase II, alpha 1 polypeptide                                                                       | Csnk2a1                                                           | 0.5           | 8.75E-05    | 0.056951495 |
| 1375894_at   | leucine zipper transcription factor-like 1                                                                  | Lztf1                                                             | 0.7           | 9.26E-05    | 0.056951495 |
| 1382362_at   | Transcribed locus                                                                                           | ---                                                               | 0.7           | 0.000105921 | 0.06040267  |
| 1379469_at   | transducin (beta)-like 1 X-linked (predicted)                                                               | Tbl1x_predicted                                                   | 0.6           | 0.000106081 | 0.06040267  |
| 1395595_at   | Mki67 (FHA domain) interacting nucleolar phosphoprotein                                                     | Mki67ip                                                           | 0.6           | 0.000116185 | 0.060484027 |
| 1377501_at   | similar to zinc finger protein 75 (predicted)                                                               | RGD1565419_predicted                                              | 0.6           | 0.000121873 | 0.060484027 |
| 1392207_at   | LUC7-like (S. cerevisiae)                                                                                   | Luc7l                                                             | 0.6           | 0.000125541 | 0.060484027 |
| 1369627_at   | synaptic vesicle glycoprotein 2b                                                                            | Sv2b                                                              | 0.4           | 0.000130204 | 0.060484027 |
| 1384792_at   | pre-mRNA processing factor 40 homolog A (yeast) (predicted)                                                 | Prpf40a_predicted                                                 | 0.5           | 0.000135794 | 0.060484027 |
| 1393764_at   | Opioid growth factor receptor-like 1                                                                        | Ogfrl1                                                            | 0.7           | 0.000150369 | 0.060484027 |
| 1392838_at   | similar to CG13957-PA (predicted)                                                                           | RGD1309995_predicted                                              | 0.5           | 0.00015941  | 0.060484027 |
| 1394837_at   | ---                                                                                                         | ---                                                               | 0.4           | 0.000161803 | 0.060484027 |
| 1391075_at   | regulator of G-protein signaling 17 (predicted)                                                             | Rgs17_predicted                                                   | 0.7           | 0.000165817 | 0.060484027 |
| 1375644_at   | Transthyretin                                                                                               | Ttr                                                               | 0.5           | 0.000173943 | 0.060484027 |
| 1394243_at   | spermine synthase /// similar to spermine synthase (predicted) /// similar to spermine synthase             | LOC683008 ///<br>LOC690027 ///<br>RGD1559938_predicted<br>/// Sms | 0.6           | 0.000177339 | 0.060484027 |
| 1394891_at   | Transcribed locus                                                                                           | ---                                                               | 0.7           | 0.000188321 | 0.060484027 |
| 1393909_at   | similar to KIAA1841 protein (predicted)                                                                     | RGD1305110_predicted                                              | 0.6           | 0.000190074 | 0.060484027 |
| 1376641_at   | THO complex 1                                                                                               | Thoc1                                                             | 0.7           | 0.000195323 | 0.060484027 |
| 1372793_at   | single-stranded DNA binding protein 1                                                                       | Ssbp1                                                             | 0.7           | 0.000201979 | 0.060484027 |
| 1390893_at   | transmembrane protein 69                                                                                    | Tmem69                                                            | 0.7           | 0.000204216 | 0.060484027 |
| 1373538_at   | ubiquitin specific peptidase 1                                                                              | Usp1                                                              | 0.5           | 0.000208087 | 0.060484027 |
| 1389989_at   | alpha thalassemia/mental retardation syndrome X-linked homolog (human)                                      | Atrx                                                              | 0.5           | 0.000211189 | 0.060484027 |
| 1368083_at   | cyclin H                                                                                                    | Ccnh                                                              | 0.7           | 0.000213804 | 0.060484027 |
| 1384181_at   | Transcribed locus                                                                                           | ---                                                               | 0.6           | 0.000215546 | 0.060484027 |
| 1383549_at   | similar to RIKEN cDNA C030048B08                                                                            | RGD1310794                                                        | 0.7           | 0.000220745 | 0.060484027 |
| 1374232_at   | phosphatidylinositol 3-kinase, catalytic, alpha polypeptide                                                 | Pik3ca                                                            | 0.6           | 0.000228094 | 0.060484027 |
| 1398617_at   | Transcribed locus, strongly similar to XP_001060577.1 similar to ribosomal protein S27a [Rattus norvegicus] | ---                                                               | 0.7           | 0.000231796 | 0.060484027 |

|              |                                                                                                                                                                                                                                                                              |                                |     |             |             |
|--------------|------------------------------------------------------------------------------------------------------------------------------------------------------------------------------------------------------------------------------------------------------------------------------|--------------------------------|-----|-------------|-------------|
| 1385349_at   | similar to centrin 4                                                                                                                                                                                                                                                         | LOC684095                      | 0.7 | 0.00024025  | 0.060484027 |
| 1384154_at   | WW domain binding protein 4                                                                                                                                                                                                                                                  | Wbp4                           | 0.6 | 0.000241051 | 0.060484027 |
| 1399164_a_at | similar to RIKEN cDNA 1810030N24 (predicted)                                                                                                                                                                                                                                 | RGD1305158_predicted           | 0.7 | 0.00024276  | 0.060484027 |
| 1376175_at   | similar to NipSnap2 protein (Glioblastoma amplified sequence)                                                                                                                                                                                                                | LOC498174                      | 0.6 | 0.000251365 | 0.061340155 |
| 1390168_a_at | zinc finger, CSL-type containing 3 (predicted)                                                                                                                                                                                                                               | Zcsi3_predicted                | 0.7 | 0.00026214  | 0.061369734 |
| 1372928_at   | Transcribed locus, strongly similar to XP_580054.1 hypothetical protein XP_580054 [Rattus norvegicus]                                                                                                                                                                        | ---                            | 0.7 | 0.000262363 | 0.061369734 |
| 1398716_at   | Non-coding RNA expressed in the brain, repeat sequence, clone 3 /// Non-coding RNA expressed in the brain, repeat sequence, clone 2 /// Non-coding RNA expressed in the brain, repeat sequence, clone 12 /// Non-coding RNA expressed in the brain, repeat sequence, clone 7 | ---                            | 0.5 | 0.000276284 | 0.061369734 |
| 1380523_at   | F-box protein 15 (predicted)                                                                                                                                                                                                                                                 | Fbxo15_predicted               | 0.6 | 0.000291515 | 0.061369734 |
| 1395199_at   | eukaryotic translation initiation factor 3, subunit 1 alpha (predicted) /// similar to Eukaryotic translation initiation factor 3 subunit 1 (eIF-3 alpha)                                                                                                                    | Eif3s1_predicted /// LOC691947 | 0.7 | 0.000291872 | 0.061369734 |
| 1370122_at   | RAB27B, member RAS oncogene family                                                                                                                                                                                                                                           | Rab27b                         | 0.6 | 0.000294263 | 0.061369734 |
| 1392166_at   | Non-coding RNA expressed in the brain, repeat sequence, clone 12                                                                                                                                                                                                             | ---                            | 0.5 | 0.000297011 | 0.061369734 |
| 1390549_at   | adiponectin receptor 2                                                                                                                                                                                                                                                       | Adipor2                        | 0.6 | 0.000297692 | 0.061369734 |
| 1391466_at   | ---                                                                                                                                                                                                                                                                          | ---                            | 0.7 | 0.00029819  | 0.061369734 |
| 1381542_at   | UBX domain containing 2                                                                                                                                                                                                                                                      | Ubx2                           | 0.5 | 0.000314647 | 0.061438374 |
| 1390454_at   | 4-nitrophenylphosphatase domain and non-neuronal SNAP25-like protein homolog 1 (C. elegans)                                                                                                                                                                                  | Nipsnap1                       | 0.7 | 0.000316522 | 0.061438374 |
| 1385871_at   | DEAH (Asp-Glu-Ala-His) box polypeptide 36 (predicted)                                                                                                                                                                                                                        | Dhx36_predicted                | 0.7 | 0.000318832 | 0.061438374 |
| 1381445_at   | Estrogen-related receptor gamma                                                                                                                                                                                                                                              | Esrrg                          | 0.7 | 0.000320104 | 0.061438374 |
| 1378741_at   | similar to putative phosphatase subunit                                                                                                                                                                                                                                      | RGD1309207                     | 0.8 | 0.000328852 | 0.062137848 |
| 1384519_at   | SEC63-like (S. cerevisiae) (predicted)                                                                                                                                                                                                                                       | Sec63_predicted                | 0.7 | 0.000337994 | 0.062137848 |
| 1394566_at   | similar to hypothetical protein FLJ13188 (predicted)                                                                                                                                                                                                                         | RGD1305500_predicted           | 0.6 | 0.000338299 | 0.062137848 |
| 1391212_at   | transcription elongation factor A (SII)-like 1                                                                                                                                                                                                                               | Tceal1                         | 0.7 | 0.000345436 | 0.062681954 |
| 1375676_at   | Transcribed locus                                                                                                                                                                                                                                                            | ---                            | 0.6 | 0.000359406 | 0.062681954 |
| 1389202_at   | similar to Ribulose-5-phosphate-3-epimerase                                                                                                                                                                                                                                  | MGC124653                      | 0.7 | 0.000365922 | 0.062681954 |
| 1377105_at   | zinc finger protein 91                                                                                                                                                                                                                                                       | Zfp91                          | 0.6 | 0.00037363  | 0.062681954 |
| 1382419_at   | SoxLZ/Sox6 leucine zipper binding protein in testis (predicted)                                                                                                                                                                                                              | Solt_predicted                 | 0.8 | 0.000376444 | 0.062681954 |
| 1374959_at   | NAD(P)H dehydrogenase, quinone 2                                                                                                                                                                                                                                             | Nqo2                           | 0.7 | 0.000377956 | 0.062681954 |
| 1397469_at   | dystonin (predicted)                                                                                                                                                                                                                                                         | Dst_predicted                  | 0.7 | 0.000381963 | 0.062737351 |
| 1392449_at   | RAD18 homolog (S. cerevisiae) (predicted)                                                                                                                                                                                                                                    | Rad18_predicted                | 0.7 | 0.000399022 | 0.063382433 |
| 1376523_at   | AT rich interactive domain 4A (Rbp1 like) (predicted)                                                                                                                                                                                                                        | Arid4a_predicted               | 0.6 | 0.000400405 | 0.063382433 |
| 1368158_at   | sec1 family domain containing 1                                                                                                                                                                                                                                              | Scfd1                          | 0.7 | 0.000400732 | 0.063382433 |
| 1390435_at   | LOC361111 (predicted)                                                                                                                                                                                                                                                        | RGD1307583_predicted           | 0.8 | 0.000408792 | 0.063629048 |
| 1373177_x_at | ---                                                                                                                                                                                                                                                                          | ---                            | 0.7 | 0.000417733 | 0.063711755 |
| 1393248_at   | NMD3 homolog (S. cerevisiae) (predicted)                                                                                                                                                                                                                                     | Nmd3_predicted                 | 0.7 | 0.000425164 | 0.064271321 |
| 1381847_at   | Similar to BC021442 protein (predicted)                                                                                                                                                                                                                                      | RGD1561413_predicted           | 0.7 | 0.000433101 | 0.064896738 |
| 1384795_at   | zinc finger, matrin-like (predicted)                                                                                                                                                                                                                                         | Zfml_predicted                 | 0.5 | 0.000438435 | 0.064896995 |
| 1396403_at   | similar to KIAA2026 protein                                                                                                                                                                                                                                                  | RGD1311595                     | 0.7 | 0.000442699 | 0.064896995 |
| 1376208_at   | ---                                                                                                                                                                                                                                                                          | ---                            | 0.6 | 0.000449658 | 0.064970017 |
| 1370442_at   | thymosin beta-like protein 1                                                                                                                                                                                                                                                 | Tmsb1                          | 0.7 | 0.00045641  | 0.064970017 |
| 1390655_at   | ---                                                                                                                                                                                                                                                                          | ---                            | 0.5 | 0.000470623 | 0.065894944 |
| 1391968_at   | Transcribed locus                                                                                                                                                                                                                                                            | ---                            | 0.6 | 0.000477815 | 0.066357972 |
| 1376853_at   | similar to RIKEN cDNA 2310042P20                                                                                                                                                                                                                                             | MGC94954                       | 0.6 | 0.000495496 | 0.067677153 |
| 1381826_at   | ---                                                                                                                                                                                                                                                                          | ---                            | 0.7 | 0.000504681 | 0.067677153 |
| 1393166_at   | ---                                                                                                                                                                                                                                                                          | ---                            | 0.7 | 0.000506946 | 0.067677153 |
| 1387706_at   | gamma-aminobutyric acid A receptor, gamma 1                                                                                                                                                                                                                                  | Gabrg1                         | 0.7 | 0.00052721  | 0.068488178 |
| 1392818_at   | growth arrest specific 5                                                                                                                                                                                                                                                     | Gas5                           | 0.7 | 0.000539693 | 0.069012738 |
| 1394059_s_at | YME1-like 1 (S. cerevisiae)                                                                                                                                                                                                                                                  | Yme11                          | 0.7 | 0.000546984 | 0.069012738 |

|              |                                                                                                                                                                                                                                                                                              |                                                                  |     |             |             |
|--------------|----------------------------------------------------------------------------------------------------------------------------------------------------------------------------------------------------------------------------------------------------------------------------------------------|------------------------------------------------------------------|-----|-------------|-------------|
| 1397468_at   | similar to RIKEN cDNA 2610207116                                                                                                                                                                                                                                                             | RGD1305387                                                       | 0.6 | 0.000549781 | 0.069012738 |
| 1383007_at   | Bardet-Biedl syndrome 4 homolog (human) (predicted)                                                                                                                                                                                                                                          | Bbs4_predicted                                                   | 0.6 | 0.000560415 | 0.069012738 |
| 1377182_at   | integrin beta 3 binding protein (beta3-endonexin)                                                                                                                                                                                                                                            | Itgb3bp                                                          | 0.8 | 0.000573546 | 0.069012738 |
| 1396480_at   | Hyaluronoglucosaminidase 3                                                                                                                                                                                                                                                                   | Hyal3                                                            | 0.7 | 0.00057678  | 0.069012738 |
| 1373387_at   | similar to CG33714-PB, isoform B                                                                                                                                                                                                                                                             | LOC681987 ///<br>LOC688717                                       | 0.8 | 0.000590882 | 0.069012738 |
| 1381098_at   | similar to RIKEN cDNA 1810048J11 (predicted) ///<br>similar to B0511.12                                                                                                                                                                                                                      | LOC690217 ///<br>RGD1305147_predict<br>ed                        | 0.5 | 0.00059305  | 0.069012738 |
| 1388101_at   | dihydropyrimidinase-like 3                                                                                                                                                                                                                                                                   | Dpysl3                                                           | 0.4 | 0.000596405 | 0.069012738 |
| 1382477_at   | SUMO/sentrin specific protease 5 (predicted) ///<br>similar to SUMO/sentrin specific protease 5<br>(predicted) /// similar to SUMO/sentrin specific<br>protease 5                                                                                                                            | LOC686286 ///<br>RGD1564247_predict<br>ed ///<br>Senp5_predicted | 0.7 | 0.00059664  | 0.069012738 |
| 1380503_at   | hypothetical LOC305452 (predicted)                                                                                                                                                                                                                                                           | RGD1309634_predict<br>ed                                         | 0.7 | 0.000603396 | 0.069012738 |
| 1398308_at   | replication protein A3 (predicted)                                                                                                                                                                                                                                                           | Rpa3_predicted                                                   | 0.7 | 0.000603978 | 0.069012738 |
| 1388911_at   | DNA primase, p58 subunit                                                                                                                                                                                                                                                                     | Prim2                                                            | 0.7 | 0.000619172 | 0.069012738 |
| 1398983_at   | mitochondrial ribosomal protein L30 (predicted)                                                                                                                                                                                                                                              | Mrp130_predicted                                                 | 0.8 | 0.000622792 | 0.069012738 |
| 1373982_at   | similar to hypothetical protein                                                                                                                                                                                                                                                              | RGD1306595                                                       | 0.8 | 0.000629178 | 0.069012738 |
| 1398384_at   | exosome component 9                                                                                                                                                                                                                                                                          | Exosc9                                                           | 0.7 | 0.000630345 | 0.069012738 |
| 1371623_at   | similar to CG7224-PA, isoform A /// hypothetical<br>protein LOC685888                                                                                                                                                                                                                        | LOC684207 ///<br>LOC685888                                       | 0.8 | 0.000632198 | 0.069012738 |
| 1385972_at   | kelch repeat and BTB (POZ) domain containing 3<br>(predicted)                                                                                                                                                                                                                                | Kbtbd3_predicted                                                 | 0.7 | 0.00063455  | 0.069012738 |
| 1384759_at   | PHD finger protein 17 (predicted)                                                                                                                                                                                                                                                            | Phf17_predicted                                                  | 0.8 | 0.000641591 | 0.069012738 |
| 1391280_at   | similar to malignant T cell amplified sequence 1                                                                                                                                                                                                                                             | LOC682340 ///<br>LOC689500                                       | 0.8 | 0.000649588 | 0.069012738 |
| 1397700_x_at | Non-coding RNA expressed in the brain, repeat<br>sequence, clone 3 /// Non-coding RNA expressed<br>in the brain, repeat sequence, clone 2 /// Non-<br>coding RNA expressed in the brain, repeat<br>sequence, clone 12 /// Non-coding RNA<br>expressed in the brain, repeat sequence, clone 7 | ---                                                              | 0.6 | 0.000652561 | 0.069012738 |
| 1373499_at   | growth arrest specific 5                                                                                                                                                                                                                                                                     | Gas5                                                             | 0.7 | 0.000652598 | 0.069012738 |
| 1393088_at   | RNA (guanine-9-) methyltransferase domain<br>containing 1                                                                                                                                                                                                                                    | Rg9mtd1                                                          | 0.7 | 0.00065277  | 0.069012738 |
| 1381850_at   | protein phosphatase 1, regulatory (inhibitor)<br>subunit 12A                                                                                                                                                                                                                                 | Ppp1r12a                                                         | 0.6 | 0.000656651 | 0.069012738 |
| 1372626_at   | similar to Tumor protein D53 (mD53) (Tumor<br>protein D52-like 1)                                                                                                                                                                                                                            | LOC689256                                                        | 0.8 | 0.000657804 | 0.069012738 |
| 1392902_at   | similar to chromosome 20 open reading frame 6                                                                                                                                                                                                                                                | RGD1306067                                                       | 0.8 | 0.000666301 | 0.069198114 |
| 1390808_at   | similar to microfibrillar-associated protein 1<br>(predicted)                                                                                                                                                                                                                                | RGD1562232_predict<br>ed ///<br>RGD1564148_predict<br>ed         | 0.8 | 0.000672749 | 0.069198114 |
| 1392514_at   | brix domain containing 1 (predicted)                                                                                                                                                                                                                                                         | Bxdc1_predicted                                                  | 0.8 | 0.000676997 | 0.069198114 |
| 1381193_at   | similar to lysophosphatidylglycerol acyltransferase<br>1                                                                                                                                                                                                                                     | LOC679692 ///<br>LOC683760                                       | 0.7 | 0.000680469 | 0.069198114 |
| 1385999_at   | YME1-like 1 (S. cerevisiae)                                                                                                                                                                                                                                                                  | Yme11                                                            | 0.7 | 0.000694497 | 0.069376603 |
| 1392995_at   | similar to zinc finger protein 322a                                                                                                                                                                                                                                                          | LOC680201 ///<br>LOC684943                                       | 0.7 | 0.000703258 | 0.069439606 |
| 1374061_at   | CD302 antigen                                                                                                                                                                                                                                                                                | Cd302                                                            | 0.7 | 0.000718095 | 0.069459846 |
| 1374953_at   | similar to CG12279-PA                                                                                                                                                                                                                                                                        | LOC500420                                                        | 0.7 | 0.000722467 | 0.069459846 |
| 1382957_at   | similar to cisplatin resistance-associated<br>overexpressed protein (predicted)                                                                                                                                                                                                              | RGD1307981_predict<br>ed                                         | 0.6 | 0.000722671 | 0.069459846 |
| 1376917_at   | zinc finger protein 292                                                                                                                                                                                                                                                                      | Znf292                                                           | 0.6 | 0.000725877 | 0.069459846 |
| 1391566_at   | Transcribed locus                                                                                                                                                                                                                                                                            | ---                                                              | 0.8 | 0.00072711  | 0.069459846 |
| 1390806_at   | similar to RIKEN cDNA B230118H07 (predicted)                                                                                                                                                                                                                                                 | RGD1309730_predict<br>ed                                         | 0.8 | 0.000735115 | 0.069459846 |
| 1383827_at   | tousled-like kinase 1 (predicted)                                                                                                                                                                                                                                                            | Tlk1_predicted                                                   | 0.4 | 0.000738443 | 0.069459846 |
| 1379101_at   | DEAH (Asp-Glu-Ala-His) box polypeptide 36<br>(predicted)                                                                                                                                                                                                                                     | Dhx36_predicted                                                  | 0.7 | 0.000752265 | 0.069652105 |
| 1389912_at   | endosulfine alpha                                                                                                                                                                                                                                                                            | Ensa                                                             | 0.7 | 0.000759333 | 0.069652105 |



|              |                                                                                                                       |                                                  |     |             |             |
|--------------|-----------------------------------------------------------------------------------------------------------------------|--------------------------------------------------|-----|-------------|-------------|
| 1380121_at   | NIMA (never in mitosis gene a)-related expressed kinase 7 (predicted)                                                 | Nek7_predicted                                   | 0.7 | 0.0007622   | 0.069652105 |
| 1393842_at   | similar to RIKEN cDNA 2700091N06 (predicted)                                                                          | RGD1310710_predicted                             | 0.7 | 0.000767618 | 0.069652105 |
| 1396676_at   | Transcribed locus                                                                                                     | ---                                              | 0.7 | 0.000778707 | 0.069652105 |
| 1394706_at   | Transcribed locus                                                                                                     | ---                                              | 0.5 | 0.000778805 | 0.069652105 |
| 1382478_at   | BTB (POZ) domain containing 3 (predicted)                                                                             | Btd3_predicted                                   | 0.7 | 0.000845762 | 0.0739693   |
| 1392936_at   | RNA binding motif protein 25 (predicted) /// similar to RNA binding motif protein 25 (predicted)                      | Rbm25_predicted /// RGD1565486_predicted         | 0.7 | 0.000847793 | 0.0739693   |
| 1373868_at   | ---                                                                                                                   | ---                                              | 0.7 | 0.00085236  | 0.0739693   |
| 1393142_at   | ---                                                                                                                   | ---                                              | 0.8 | 0.000857389 | 0.0739693   |
| 1393813_at   | tetratricopeptide repeat domain 3 (predicted)                                                                         | Ttc3_predicted                                   | 0.5 | 0.000881143 | 0.074076268 |
| 1379810_at   | small inducible cytokine subfamily E, member 1                                                                        | Scye1                                            | 0.8 | 0.000885297 | 0.074076268 |
| 1392738_at   | similar to KIAA1096 protein (predicted) /// similar to HBxAg transactivated protein 2                                 | LOC367520 /// LOC684194 /// RGD1566064_predicted | 0.6 | 0.000888985 | 0.074076268 |
| 1393158_at   | similar to 2610528M18Rik protein                                                                                      | LOC363198                                        | 0.8 | 0.000902566 | 0.074182573 |
| 1376690_at   | SRB7 (suppressor of RNA polymerase B) homolog (S. cerevisiae) (predicted)                                             | Surb7_predicted                                  | 0.8 | 0.000903289 | 0.074182573 |
| 1385101_a_at | similar to RIKEN cDNA 0610011N22 gene                                                                                 | RGD735106                                        | 0.5 | 0.000927343 | 0.075075244 |
| 1372847_at   | ACN9 homolog (S. cerevisiae)                                                                                          | Acn9                                             | 0.8 | 0.0009318   | 0.075080197 |
| 1384314_at   | mitochondrial translational initiation factor 2                                                                       | Mtif2                                            | 0.8 | 0.000939492 | 0.075265191 |
| 1382206_a_at | A kinase (PRKA) anchor protein 2                                                                                      | Akap2                                            | 0.6 | 0.000944191 | 0.075265191 |
| 1382040_at   | glutamyl-prolyl-tRNA synthetase                                                                                       | Eprs                                             | 0.6 | 0.000955423 | 0.075265191 |
| 1382787_at   | kinesin family member 5A                                                                                              | Kif5a                                            | 0.6 | 0.000958591 | 0.075265191 |
| 1394095_at   | similar to RIKEN cDNA 4930429M06Rik                                                                                   | RGD1307449                                       | 0.7 | 0.000967437 | 0.075265191 |
| 1375542_at   | Radixin                                                                                                               | Rdx                                              | 0.8 | 0.000973829 | 0.075271253 |
| 1392460_at   | ---                                                                                                                   | ---                                              | 0.8 | 0.000979516 | 0.075369813 |
| 1381677_at   | ELAV (embryonic lethal, abnormal vision, Drosophila)-like 2 (Hu antigen B)                                            | Elavl2                                           | 0.6 | 0.00099089  | 0.07556419  |
| 1376554_at   | ---                                                                                                                   | ---                                              | 0.7 | 0.00100354  | 0.076188778 |
| 1369981_at   | immunoglobulin (CD79A) binding protein 1                                                                              | Igbbp1                                           | 0.8 | 0.001013569 | 0.076331462 |
| 1378391_at   | Transcribed locus                                                                                                     | ---                                              | 0.7 | 0.001018825 | 0.076331462 |
| 1370169_at   | upstream of NRAS                                                                                                      | Unr                                              | 0.6 | 0.001053317 | 0.076489501 |
| 1389640_at   | Transcribed locus                                                                                                     | ---                                              | 0.7 | 0.001056181 | 0.076489501 |
| 1367541_at   | similar to 2810410A08Rik protein (predicted)                                                                          | RGD1566062_predicted                             | 0.7 | 0.001062292 | 0.076489501 |
| 1391549_at   | DCN1, defective in cullin neddylation 1, domain containing 4 (S. cerevisiae) (predicted)                              | Dcn1d4_predicted                                 | 0.7 | 0.001064636 | 0.076489501 |
| 1386120_at   | hypothetical protein LOC679389 /// hypothetical protein LOC689147                                                     | LOC679389 /// LOC689147                          | 0.7 | 0.001072913 | 0.076489501 |
| 1393276_at   | mediator of RNA polymerase II transcription, subunit 31 homolog (yeast) (predicted)                                   | Med31_predicted                                  | 0.8 | 0.001074955 | 0.076489501 |
| 1379555_at   | Transcribed locus                                                                                                     | ---                                              | 0.6 | 0.001077762 | 0.076489501 |
| 1373355_at   | ---                                                                                                                   | ---                                              | 0.8 | 0.001086496 | 0.076489501 |
| 1385496_at   | similar to RIKEN cDNA 0610011N22 gene                                                                                 | RGD735106                                        | 0.6 | 0.001086878 | 0.076489501 |
| 1385168_at   | similar to receptor-interacting factor 1                                                                              | RGD1306520                                       | 0.7 | 0.001095474 | 0.076489501 |
| 1392702_at   | Transcribed locus, weakly similar to NP_055333.2 finger protein 229 [Homo sapiens]                                    | ---                                              | 0.8 | 0.001102516 | 0.076557639 |
| 1393922_at   | similar to CDNA sequence BC020077 (predicted)                                                                         | RGD1561825_predicted                             | 0.6 | 0.00111739  | 0.076887011 |
| 1398756_at   | nucleophosmin 1 /// similar to Nucleophosmin (NPM) (Nucleolar phosphoprotein B23) (Numatrin) (Nucleolar protein NO38) | LOC300303 /// Npm1                               | 0.8 | 0.001125617 | 0.076887011 |
| 1392897_at   | ---                                                                                                                   | ---                                              | 0.8 | 0.001127885 | 0.076887011 |
| 1381476_at   | Transcribed locus                                                                                                     | ---                                              | 0.8 | 0.001139377 | 0.076887011 |
| 1397508_at   | DEAD (Asp-Glu-Ala-Asp) box polypeptide 18                                                                             | Ddx18                                            | 0.7 | 0.001144103 | 0.076887011 |
| 1388060_at   | synaptotagmin XII                                                                                                     | Syt12                                            | 0.7 | 0.001154932 | 0.076887011 |
| 1373885_at   | chromobox homolog 5 (Drosophila HP1a) (predicted)                                                                     | Cbx5_predicted                                   | 0.7 | 0.001169019 | 0.076887011 |
| 1392170_at   | RWD domain containing 3                                                                                               | Rwdd3                                            | 0.7 | 0.001170984 | 0.076887011 |
| 1386266_at   | Similar to male sterility domain containing 1 (predicted)                                                             | RGD1565966_predicted                             | 0.8 | 0.001177272 | 0.076887011 |

|              |                                                                                                                                                      |                                    |     |             |             |
|--------------|------------------------------------------------------------------------------------------------------------------------------------------------------|------------------------------------|-----|-------------|-------------|
| 1392541_at   | similar to RIKEN cDNA A030007L17; EST AA673177 (predicted) /// similar to C44B7.7                                                                    | LOC685702 /// RGD1304876_predicted | 0.8 | 0.001177877 | 0.076887011 |
| 1392045_at   | transmembrane protein 22                                                                                                                             | Tmem22                             | 0.8 | 0.001179803 | 0.076887011 |
| 1392399_at   | WD repeats and SOF domain containing 1 (predicted)                                                                                                   | Wdsof1_predicted                   | 0.8 | 0.00119782  | 0.077473761 |
| 1376681_at   | similar to RIKEN cDNA 1500003O22                                                                                                                     | RGD1308302                         | 0.8 | 0.001226655 | 0.077760255 |
| 1368775_at   | gonadotropin inducible ovarian transcription factor 1                                                                                                | Giot1                              | 0.8 | 0.001230689 | 0.077760255 |
| 1379689_at   | Transcribed locus                                                                                                                                    | ---                                | 0.6 | 0.001252908 | 0.077760255 |
| 1384352_at   | PAP associated domain containing 4                                                                                                                   | Papd4                              | 0.7 | 0.001254999 | 0.077760255 |
| 1373472_at   | ARP6 actin-related protein 6 homolog (yeast) (predicted)                                                                                             | Actr6_predicted                    | 0.8 | 0.001271022 | 0.077760255 |
| 1380489_at   | Similar to RIKEN cDNA G430041M01 (predicted)                                                                                                         | RGD1562563_predicted               | 0.7 | 0.001276711 | 0.077760255 |
| 1393847_at   | NFKB inhibitor interacting Ras-like protein 1 (predicted)                                                                                            | Nkiras1_predicted                  | 0.8 | 0.001285295 | 0.077760255 |
| 1393683_at   | similar to KIAA0368 (predicted)                                                                                                                      | RGD1306148_predicted               | 0.5 | 0.001286894 | 0.077760255 |
| 1380546_at   | similar to hypothetical protein FLJ10986                                                                                                             | LOC298250                          | 0.8 | 0.001287622 | 0.077760255 |
| 1388850_at   | heat shock protein 1, alpha                                                                                                                          | Hspca                              | 0.7 | 0.001304855 | 0.077760255 |
| 1382161_at   | M-phase phosphoprotein 10 (U3 small nucleolar ribonucleoprotein) (predicted)                                                                         | Mphosph10_predicted                | 0.7 | 0.001307206 | 0.077760255 |
| 1368588_at   | DEAD (Asp-Glu-Ala-Asp) box polypeptide 52                                                                                                            | Ddx52                              | 0.7 | 0.001315151 | 0.077760255 |
| 1367500_at   | similar to 26 proteasome complex subunit DSS1 (Deleted in split hand/split foot protein 1) (Split hand/foot deleted protein 1 homolog)               | LOC679014 /// LOC680532            | 0.8 | 0.001317269 | 0.077760255 |
| 1384029_at   | xeroderma pigmentosum, complementation group A (predicted)                                                                                           | Xpa_predicted                      | 0.8 | 0.001332683 | 0.077760255 |
| 1391830_at   | copine VIII (predicted)                                                                                                                              | Cpne8_predicted                    | 0.7 | 0.001342538 | 0.077760255 |
| 1395587_at   | similar to Alkaline phosphatase (aPHC) (Alkaline phosphatase) (predicted)                                                                            | RGD1561254_predicted               | 0.8 | 0.001349247 | 0.077760255 |
| 1382948_at   | similar to hypothetical protein E130310N06 (predicted)                                                                                               | RGD1559882_predicted               | 0.8 | 0.001349659 | 0.077760255 |
| 1398588_at   | similar to step II splicing factor SLU7; DNA segment, Chr 11, ERATO Doi 730, expressed; DNA segment, Chr 3, Brigham & Womens Genetics 0878 expressed | LOC303057                          | 0.7 | 0.00135763  | 0.077760255 |
| 1397335_at   | sema domain, immunoglobulin domain (Ig), short basic domain, secreted, (semaphorin) 3D                                                               | Sema3d                             | 0.6 | 0.001360788 | 0.077760255 |
| 1393615_at   | similar to DEP domain containing 6 (predicted)                                                                                                       | RGD1561030_predicted               | 0.5 | 0.001362291 | 0.077760255 |
| 1391649_a_at | Transcribed locus                                                                                                                                    | ---                                | 0.8 | 0.001365823 | 0.077760255 |
| 1387077_at   | cAMP-regulated phosphoprotein 19                                                                                                                     | Arpp19                             | 0.8 | 0.001368654 | 0.077760255 |
| 1391078_at   | replication factor C 1                                                                                                                               | Recc1                              | 0.8 | 0.001376547 | 0.077760255 |
| 1389980_at   | similar to Protein HSPC163 (predicted)                                                                                                               | RGD1559740_predicted               | 0.7 | 0.001388147 | 0.077760255 |
| 1383643_at   | similar to UPF0197 protein C11orf10 homolog (predicted)                                                                                              | RGD1560328_predicted               | 0.8 | 0.001388784 | 0.077760255 |
| 1375634_at   | coiled-coil domain containing 53 (predicted)                                                                                                         | Ccdc53_predicted                   | 0.8 | 0.001394114 | 0.077760255 |
| 1385050_at   | zinc finger protein 292                                                                                                                              | Znf292                             | 0.7 | 0.001403051 | 0.07781467  |
| 1373273_at   | PRP38 pre-mRNA processing factor 38 (yeast) domain containing A (predicted)                                                                          | Prpf38a_predicted                  | 0.7 | 0.001416558 | 0.078056888 |
| 1376753_at   | Fucose-1-phosphate guanylyltransferase                                                                                                               | Fpgt                               | 0.8 | 0.001421402 | 0.078072015 |
| 1379737_a_at | RNA-binding region (RNP1, RRM) containing 2                                                                                                          | Rnpc2                              | 0.6 | 0.001442707 | 0.078485104 |
| 1377684_at   | arginyl-tRNA synthetase-like (predicted)                                                                                                             | Rarsl_predicted                    | 0.8 | 0.001498879 | 0.079890524 |
| 1372697_at   | mitochondrial ribosomal protein S15                                                                                                                  | Mrps15                             | 0.7 | 0.001523039 | 0.080458803 |
| 1392154_at   | zinc finger, MYND domain containing 11                                                                                                               | Zmynd11                            | 0.7 | 0.001535013 | 0.080458803 |
| 1383579_at   | Transcribed locus, moderately similar to XP_577744.1 similar to IKEN cDNA 6720480D16 [Rattus norvegicus]                                             | ---                                | 0.7 | 0.001539542 | 0.080458803 |
| 1389384_at   | hormone-regulated proliferation associated protein 20                                                                                                | Hrpap20                            | 0.8 | 0.001545004 | 0.080458803 |
| 1380695_at   | Transcribed locus                                                                                                                                    | ---                                | 0.5 | 0.001550012 | 0.080458803 |
| 1383161_a_at | ---                                                                                                                                                  | ---                                | 0.8 | 0.001575556 | 0.080458803 |
| 1382415_at   | LOC360807                                                                                                                                            | LOC360807                          | 0.7 | 0.001597517 | 0.080458803 |
| 1388353_at   | proliferation-associated 2G4                                                                                                                         | Pa2g4                              | 0.6 | 0.001601052 | 0.080458803 |
| 1398905_at   | ATPase, H transporting, lysosomal V1 subunit G1 (predicted)                                                                                          | Atp6v1g1_predicted                 | 0.7 | 0.001602231 | 0.080458803 |

|              |                                                                                                                                                              |                                                           |     |             |             |
|--------------|--------------------------------------------------------------------------------------------------------------------------------------------------------------|-----------------------------------------------------------|-----|-------------|-------------|
| 1372927_at   | ---                                                                                                                                                          | ---                                                       | 0.8 | 0.00160248  | 0.080458803 |
| 1385006_at   | alpha thalassemia/mental retardation syndrome X-linked homolog (human)                                                                                       | Atrx                                                      | 0.6 | 0.001606162 | 0.080458803 |
| 1391050_at   | metal response element binding transcription factor 2                                                                                                        | Mtf2                                                      | 0.8 | 0.001634078 | 0.081617875 |
| 1378656_at   | Bardet-Biedl syndrome 5 homolog (human) (predicted)                                                                                                          | Bbs5_predicted                                            | 0.8 | 0.001650242 | 0.081884988 |
| 1368712_at   | zinc finger protein 386 (Kruppel-like)                                                                                                                       | Znf386                                                    | 0.8 | 0.001661803 | 0.081884988 |
| 1377720_x_at | ---                                                                                                                                                          | ---                                                       | 0.8 | 0.001662292 | 0.081884988 |
| 1397200_at   | chromodomain helicase DNA binding protein 4                                                                                                                  | Chd4                                                      | 0.7 | 0.001663394 | 0.081884988 |
| 1373875_at   | similar to RIKEN cDNA 1190005P17 (predicted) /// hypothetical protein LOC690089                                                                              | LOC690089 /// RGD1308261_predicted                        | 0.8 | 0.001670353 | 0.081991316 |
| 1383162_at   | ---                                                                                                                                                          | ---                                                       | 0.7 | 0.001684867 | 0.082142371 |
| 1395318_at   | similar to chromodomain helicase DNA binding protein 9                                                                                                       | LOC680231 /// LOC682690                                   | 0.8 | 0.001697083 | 0.082356726 |
| 1384887_at   | ---                                                                                                                                                          | ---                                                       | 0.8 | 0.001717013 | 0.082920185 |
| 1375335_at   | heat shock 90kDa protein 1, beta                                                                                                                             | Hspcb                                                     | 0.7 | 0.001718402 | 0.082920185 |
| 1378474_at   | Transcribed locus                                                                                                                                            | ---                                                       | 0.8 | 0.001742668 | 0.083384476 |
| 1394814_at   | translocated promoter region                                                                                                                                 | Tpr                                                       | 0.4 | 0.001765124 | 0.083561954 |
| 1388809_at   | sphingomyelin phosphodiesterase, acid-like 3A                                                                                                                | Smpdl3a                                                   | 0.7 | 0.00177273  | 0.083605912 |
| 1390604_s_at | integrin beta 3 binding protein (beta3-endonexin)                                                                                                            | Itgb3bp                                                   | 0.8 | 0.00178076  | 0.083605912 |
| 1397555_at   | ---                                                                                                                                                          | ---                                                       | 0.5 | 0.001788648 | 0.083605912 |
| 1389874_at   | similar to U2 small nuclear ribonucleoprotein auxiliary factor 35 kDa subunit related-protein 1 (U2(RNU2) small nuclear RNA auxillary factor 1-like 1) (SP2) | LOC498425                                                 | 0.5 | 0.001805584 | 0.083605912 |
| 1383730_at   | Tetratricopeptide repeat domain 9C                                                                                                                           | Ttc9c                                                     | 0.8 | 0.001809057 | 0.083605912 |
| 1378404_at   | Transcribed locus                                                                                                                                            | ---                                                       | 0.8 | 0.001811176 | 0.083605912 |
| 1372815_at   | mago-nashi homolog, proliferation-associated (Drosophila) (predicted)                                                                                        | Magoh_predicted                                           | 0.8 | 0.001811801 | 0.083605912 |
| 1382705_at   | Transcribed locus                                                                                                                                            | ---                                                       | 0.8 | 0.001839853 | 0.083605912 |
| 1390237_at   | translocase of inner mitochondrial membrane 8 homolog a (yeast)                                                                                              | Timm8a                                                    | 0.8 | 0.001839978 | 0.083605912 |
| 1384791_at   | UDP-GlcNAc:betaGal beta-1,3-N-acetylglucosaminyltransferase 1 (predicted)                                                                                    | B3gnt1_predicted                                          | 0.6 | 0.001847123 | 0.083605912 |
| 1378245_at   | similar to 6430514L14Rik protein (predicted)                                                                                                                 | RGD1311958_predicted                                      | 0.8 | 0.001875265 | 0.083605912 |
| 1373433_at   | nucleosome binding protein 1 (predicted) /// similar to Nucleosome binding protein 1 (Nucleosome binding protein 45) (NBP-45) (GARP45 protein)               | LOC680182 /// LOC681284 /// LOC682212 /// Nsbp1_predicted | 0.7 | 0.001875798 | 0.083605912 |
| 1384956_at   | Transcribed locus                                                                                                                                            | ---                                                       | 0.7 | 0.001893078 | 0.083605912 |
| 1385594_at   | Transcribed locus                                                                                                                                            | ---                                                       | 0.8 | 0.00189309  | 0.083605912 |
| 1385020_at   | similar to DNA segment, Chr 19, Brigham & Womens Genetics 1357 expressed (predicted) /// hypothetical protein LOC499339 /// similar to D19Bwg1357e protein   | LOC499339 /// LOC683670 /// RGD1308750_predicted          | 0.8 | 0.001894128 | 0.083605912 |
| 1379307_at   | sodium channel associated protein 1                                                                                                                          | Sap1                                                      | 0.7 | 0.001909242 | 0.08362479  |
| 1391689_at   | similar to Retinoblastoma-binding protein 2 (RBBP2)                                                                                                          | LOC312678                                                 | 0.8 | 0.001921269 | 0.083936369 |
| 1394985_at   | early endosome antigen 1 (predicted)                                                                                                                         | Eea1_predicted                                            | 0.5 | 0.001939906 | 0.084352863 |
| 1396612_at   | ankyrin 2, neuronal                                                                                                                                          | Ank2                                                      | 0.6 | 0.001941622 | 0.084352863 |
| 1383628_at   | Transcribed locus                                                                                                                                            | ---                                                       | 0.8 | 0.001960287 | 0.084516929 |
| 1396392_at   | Dynactin 6 (predicted)                                                                                                                                       | Dctn6_predicted                                           | 0.7 | 0.001964244 | 0.084516929 |
| 1379862_at   | similar to CG33331-PA                                                                                                                                        | LOC362419                                                 | 0.8 | 0.001978552 | 0.084533769 |
| 1393161_at   | small nuclear RNA activating complex, polypeptide 3                                                                                                          | Snapc3                                                    | 0.7 | 0.00198443  | 0.084533769 |
| 1377917_at   | Transcribed locus, weakly similar to XP_001074405.1 similar to zinc finger protein 709 [Rattus norvegicus]                                                   | ---                                                       | 0.7 | 0.0019979   | 0.0846852   |
| 1385347_at   | Transcribed locus                                                                                                                                            | ---                                                       | 0.6 | 0.002020348 | 0.085265264 |
| 1383256_at   | deoxynucleotidyltransferase, terminal, interacting protein 2 (predicted)                                                                                     | Dntip2_predicted                                          | 0.8 | 0.002021568 | 0.085265264 |
| 1391070_at   | similar to hypothetical MGC48595 (predicted)                                                                                                                 | RGD1566220_predicted                                      | 0.8 | 0.002028738 | 0.085356891 |
| 1368843_at   | YME1-like 1 (S. cerevisiae)                                                                                                                                  | Yme1l1                                                    | 0.7 | 0.002037595 | 0.085518905 |

|              |                                                                                                                                                                                                                                                                              |                                                        |     |             |             |
|--------------|------------------------------------------------------------------------------------------------------------------------------------------------------------------------------------------------------------------------------------------------------------------------------|--------------------------------------------------------|-----|-------------|-------------|
| 1374323_at   | BRCA2 and CDKN1A interacting protein (predicted)                                                                                                                                                                                                                             | Bccip_predicted                                        | 0.8 | 0.002056313 | 0.085882478 |
| 1383326_a_at | ---                                                                                                                                                                                                                                                                          | ---                                                    | 0.8 | 0.002063275 | 0.085963073 |
| 1376483_at   | LSM5 homolog, U6 small nuclear RNA associated (S. cerevisiae) (predicted)                                                                                                                                                                                                    | Lsm5_predicted                                         | 0.7 | 0.002069618 | 0.085968527 |
| 1381205_at   | similar to small nuclear RNA activating complex, polypeptide 5                                                                                                                                                                                                               | LOC686858 ///<br>LOC691501                             | 0.8 | 0.002090885 | 0.086480636 |
| 1383876_at   | intraflagellar transport 74 homolog (Chlamydomonas)                                                                                                                                                                                                                          | ift74                                                  | 0.8 | 0.0021055   | 0.08683526  |
| 1371523_at   | ---                                                                                                                                                                                                                                                                          | ---                                                    | 0.8 | 0.002109626 | 0.08683526  |
| 1391618_at   | kinesin-associated protein 3 (predicted)                                                                                                                                                                                                                                     | Kifap3_predicted                                       | 0.7 | 0.00213284  | 0.087394051 |
| 1386566_at   | Transcribed locus, strongly similar to XP_509904.2 chromosome 14 open reading frame 10 isoform 6 [Pan troglodytes]                                                                                                                                                           | ---                                                    | 0.7 | 0.002134676 | 0.087394051 |
| 1370807_at   | transmembrane protein 49                                                                                                                                                                                                                                                     | Tmem49                                                 | 0.8 | 0.00219644  | 0.088340206 |
| 1373403_at   | similar to Protein C8orf4 (Thyroid cancer protein 1) (TC-1)                                                                                                                                                                                                                  | LOC684871                                              | 0.7 | 0.002197903 | 0.088340206 |
| 1378743_at   | similar to Peptidyl-prolyl cis-trans isomerase NIMA interacting 4 (Rotamase Pin4) (PPLase Pin4)                                                                                                                                                                              | LOC684441                                              | 0.8 | 0.00223674  | 0.089149533 |
| 1385273_at   | Nuclear pore associated protein                                                                                                                                                                                                                                              | Npap60                                                 | 0.8 | 0.002240542 | 0.089149533 |
| 1384147_at   | eukaryotic translation initiation factor 1A                                                                                                                                                                                                                                  | Eif1a                                                  | 0.7 | 0.002244134 | 0.089149533 |
| 1385491_at   | similar to KIAA1183 protein (predicted)                                                                                                                                                                                                                                      | RGD1560435_predicted                                   | 0.4 | 0.002253894 | 0.08928109  |
| 1385859_at   | Glutaredoxin 2 (thioltransferase)                                                                                                                                                                                                                                            | Glrx2                                                  | 0.4 | 0.002257899 | 0.08928109  |
| 1372642_at   | Transcribed locus                                                                                                                                                                                                                                                            | ---                                                    | 0.8 | 0.002268513 | 0.089464804 |
| 1382290_at   | similar to CG9643-PA (predicted)                                                                                                                                                                                                                                             | RGD1306300_predicted                                   | 0.7 | 0.002280935 | 0.089569968 |
| 1374780_at   | Transcribed locus                                                                                                                                                                                                                                                            | ---                                                    | 0.8 | 0.002298971 | 0.089988014 |
| 1399130_at   | similar to RIKEN cDNA 2610022G08                                                                                                                                                                                                                                             | LOC502782                                              | 0.7 | 0.002305854 | 0.089988014 |
| 1386016_at   | similar to Placental protein 25 homolog (PP25)                                                                                                                                                                                                                               | LOC683481 ///<br>LOC685284                             | 0.8 | 0.002324245 | 0.090439072 |
| 1377719_a_at | ---                                                                                                                                                                                                                                                                          | ---                                                    | 0.8 | 0.002345144 | 0.090683187 |
| 1375622_at   | zinc finger, FYVE domain containing 20 (predicted)                                                                                                                                                                                                                           | Zfyve20_predicted                                      | 0.5 | 0.00234648  | 0.090683187 |
| 1390312_at   | similar to mKIAA2005 protein (predicted) /// similar to sterile alpha motif domain containing 9-like /// similar to mKIAA2005 protein                                                                                                                                        | LOC500013 ///<br>LOC500015 ///<br>RGD1561472_predicted | 0.8 | 0.00235784  | 0.090683187 |
| 1382882_x_at | Non-coding RNA expressed in the brain, repeat sequence, clone 3 /// Non-coding RNA expressed in the brain, repeat sequence, clone 2 /// Non-coding RNA expressed in the brain, repeat sequence, clone 12 /// Non-coding RNA expressed in the brain, repeat sequence, clone 7 | ---                                                    | 0.7 | 0.002364059 | 0.090683187 |
| 1384761_at   | Transcribed locus, strongly similar to XP_001063039.1 similar to nuclear NF-kappaB activating protein [Rattus norvegicus]                                                                                                                                                    | ---                                                    | 0.7 | 0.002365716 | 0.090683187 |
| 1394884_s_at | single-stranded DNA binding protein 1                                                                                                                                                                                                                                        | Ssbp1                                                  | 0.8 | 0.00236768  | 0.090683187 |
| 1380696_at   | Transcribed locus                                                                                                                                                                                                                                                            | ---                                                    | 0.7 | 0.002394183 | 0.091144684 |
| 1368060_at   | heat-responsive protein 12                                                                                                                                                                                                                                                   | Hrsp12                                                 | 0.8 | 0.002401748 | 0.091144684 |
| 1372143_at   | ubiquitin-conjugating enzyme E2 variant 2                                                                                                                                                                                                                                    | Ube2v2                                                 | 0.8 | 0.002406407 | 0.091144684 |
| 1383819_at   | Transcribed locus                                                                                                                                                                                                                                                            | ---                                                    | 0.7 | 0.002439207 | 0.091899558 |
| 1397917_at   | ---                                                                                                                                                                                                                                                                          | ---                                                    | 0.7 | 0.002447857 | 0.091899558 |
| 1399018_at   | similar to cisplatin resistance-associated overexpressed protein (predicted)                                                                                                                                                                                                 | RGD1307981_predicted                                   | 0.8 | 0.002475468 | 0.09261177  |
| 1379200_at   | similar to Ubiquitin ligase protein DZIP3 (DAZ-interacting protein 3 homolog) (predicted)                                                                                                                                                                                    | RGD1563278_predicted                                   | 0.5 | 0.002477687 | 0.09261177  |
| 1391193_at   | similar to AD24 (predicted)                                                                                                                                                                                                                                                  | RGD1560656_predicted                                   | 0.8 | 0.00248762  | 0.09261177  |
| 1393369_at   | Similar to RIKEN cDNA 492151116                                                                                                                                                                                                                                              | RGD1305302                                             | 0.7 | 0.002507777 | 0.092923756 |
| 1381905_at   | ---                                                                                                                                                                                                                                                                          | ---                                                    | 0.8 | 0.002540266 | 0.093518999 |
| 1383341_at   | calcium binding protein 39-like                                                                                                                                                                                                                                              | Cab39l                                                 | 0.8 | 0.002547884 | 0.093597748 |
| 1390892_at   | DEP domain containing 1B (predicted)                                                                                                                                                                                                                                         | Depdc1b_predicted                                      | 0.8 | 0.002597337 | 0.094802787 |
| 1377503_at   | RIO kinase 2 (yeast)                                                                                                                                                                                                                                                         | RioK2                                                  | 0.8 | 0.002618574 | 0.09496919  |
| 1397708_at   | hypothetical LOC288978                                                                                                                                                                                                                                                       | LOC288978                                              | 0.8 | 0.002626512 | 0.095055243 |

|            |                                                                                                                                                                |                                                                         |     |             |             |
|------------|----------------------------------------------------------------------------------------------------------------------------------------------------------------|-------------------------------------------------------------------------|-----|-------------|-------------|
| 1382067_at | similar to UBX domain containing 4                                                                                                                             | LOC363500 ///<br>LOC679377 ///<br>LOC683882 ///<br>LOC685859            | 0.7 | 0.002646959 | 0.095391055 |
| 1385077_at | similar to golgi-specific brefeldin A-resistance guanine nucleotide exchange factor 1 (predicted)                                                              | RGD1307160_predicted                                                    | 0.7 | 0.002659073 | 0.095499738 |
| 1373866_at | similar to hypothetical protein FLJ13448                                                                                                                       | RGD1359509                                                              | 0.8 | 0.00266347  | 0.095499738 |
| 1379378_at | mitochondrial ribosomal protein S18C (predicted)                                                                                                               | Mrps18c_predicted                                                       | 0.8 | 0.002678365 | 0.095515288 |
| 1396215_at | Similar to RIKEN cDNA 2610022G08                                                                                                                               | LOC502782                                                               | 0.8 | 0.002702675 | 0.095518141 |
| 1392856_at | similar to small EDRK-rich factor 1 (predicted)                                                                                                                | RGD1565105_predicted                                                    | 0.8 | 0.002706403 | 0.095518141 |
| 1399062_at | CDNA clone IMAGE:7317308                                                                                                                                       | ---                                                                     | 0.8 | 0.00274678  | 0.095833195 |
| 1396063_at | DEK oncogene (DNA binding)                                                                                                                                     | Dek                                                                     | 0.6 | 0.002756314 | 0.095833195 |
| 1394362_at | similar to intracellular protein transport like (XM453) (predicted)                                                                                            | RGD1307525_predicted                                                    | 0.4 | 0.002757876 | 0.095833195 |
| 1385595_at | similar to antigenic determinant of rec-A protein                                                                                                              | LOC683353 ///<br>LOC689197                                              | 0.7 | 0.00277765  | 0.096048203 |
| 1393008_at | CAMP-regulated phosphoprotein 19                                                                                                                               | Arpp19                                                                  | 0.8 | 0.002784538 | 0.096058869 |
| 1382385_at | proteasome (prosome, macropain) 26S subunit, ATPase, 6                                                                                                         | Psmc6                                                                   | 0.8 | 0.002820313 | 0.096058869 |
| 1384153_at | similar to Hypothetical protein KIAA0555 (predicted)                                                                                                           | RGD1559742_predicted                                                    | 0.7 | 0.00282541  | 0.096058869 |
| 1370165_at | small muscle protein, X-linked                                                                                                                                 | Smpx                                                                    | 0.8 | 0.002826487 | 0.096058869 |
| 1389907_at | zinc finger and BTB domain containing 8 opposite strand (predicted)                                                                                            | Zbtb8os_predicted                                                       | 0.8 | 0.002847667 | 0.096058869 |
| 1393242_at | similar to chromosome 16 open reading frame 33; minus -99 protein (predicted)                                                                                  | RGD1310922_predicted                                                    | 0.8 | 0.002863195 | 0.096058869 |
| 1382014_at | ---                                                                                                                                                            | ---                                                                     | 0.8 | 0.002864585 | 0.096058869 |
| 1385163_at | ring finger protein 20 (predicted)                                                                                                                             | Rnf20_predicted                                                         | 0.7 | 0.002868392 | 0.096058869 |
| 1377685_at | similar to establishment of cohesion 1 homolog 1 (predicted) /// similar to N-acetyltransferase ESCO1 (Establishment of cohesion 1 homolog 1) (ECO1 homolog 1) | LOC680014 ///<br>LOC682499 ///<br>LOC683403 ///<br>RGD1562794_predicted | 0.8 | 0.002878249 | 0.096058869 |
| 1393030_at | ---                                                                                                                                                            | ---                                                                     | 0.8 | 0.002935912 | 0.09627783  |
| 1391025_at | Transcribed locus                                                                                                                                              | ---                                                                     | 0.7 | 0.002944049 | 0.09627783  |
| 1397614_at | similar to Gamma-aminobutyric-acid receptor alpha-2 subunit precursor (GABA(A) receptor)                                                                       | LOC289606                                                               | 0.6 | 0.002959614 | 0.09627783  |
| 1382904_at | similar to hypothetical protein DKFZp434K1421                                                                                                                  | RGD1309863                                                              | 0.7 | 0.002967716 | 0.09627783  |
| 1382413_at | Nucleoporin 155                                                                                                                                                | Nup155                                                                  | 0.8 | 0.002972548 | 0.09627783  |
| 1382812_at | similar to Protein Njmu-R1 (predicted)                                                                                                                         | RGD1310429_predicted                                                    | 0.7 | 0.002974116 | 0.09627783  |
| 1390836_at | ---                                                                                                                                                            | ---                                                                     | 0.8 | 0.002982836 | 0.09627783  |
| 1395399_at | similar to PS1D protein (predicted)                                                                                                                            | RGD1565267_predicted                                                    | 0.8 | 0.002989622 | 0.09627783  |
| 1378530_at | Transcribed locus, strongly similar to XP_580104.1 hypothetical protein XP_580104 [Rattus norvegicus]                                                          | ---                                                                     | 0.8 | 0.002995969 | 0.09627783  |
| 1387435_at | ST8 alpha-N-acetyl-neuraminide alpha-2,8-sialyltransferase 3                                                                                                   | St8sia3                                                                 | 0.8 | 0.003002487 | 0.09627783  |
| 1371634_at | similar to RIKEN cDNA 1810020E01                                                                                                                               | RGD1305677                                                              | 0.8 | 0.003006062 | 0.09627783  |
| 1383236_at | fragile X mental retardation gene 1, autosomal homolog                                                                                                         | Fxr1h                                                                   | 0.8 | 0.003042504 | 0.096962183 |
| 1389126_at | coiled-coil-helix-coiled-coil-helix domain containing 1 (predicted)                                                                                            | Chchd1_predicted                                                        | 0.8 | 0.003048161 | 0.096962183 |
| 1379829_at | ---                                                                                                                                                            | ---                                                                     | 0.8 | 0.003057755 | 0.097086559 |
| 1394626_at | similar to hypothetical protein FLJ21616 (predicted)                                                                                                           | RGD1306787_predicted                                                    | 0.5 | 0.003085464 | 0.097459196 |
| 1385487_at | LSM1 homolog, U6 small nuclear RNA associated (S. cerevisiae) (predicted)                                                                                      | Lsm1_predicted                                                          | 0.8 | 0.003093189 | 0.097459196 |
| 1388689_at | similar to Acylphosphatase, muscle type isozyme (Acylphosphate phosphohydrolase)                                                                               | LOC682245                                                               | 0.7 | 0.003094799 | 0.097459196 |
| 1393144_at | N-myc (and STAT) interactor                                                                                                                                    | Nmi                                                                     | 0.8 | 0.003099506 | 0.097459196 |
| 1394412_at | transmembrane protein 16C (predicted)                                                                                                                          | Tmem16c_predicted                                                       | 0.7 | 0.003111997 | 0.097459196 |
| 1394710_at | 5-azacytidine induced gene 2                                                                                                                                   | Azi2                                                                    | 0.8 | 0.003112099 | 0.097459196 |
| 1369984_at | cytochrome c oxidase, subunit XVII assembly protein homolog (yeast)                                                                                            | Cox17                                                                   | 0.8 | 0.003140361 | 0.097459196 |

|              |                                                                                                            |                            |     |             |             |
|--------------|------------------------------------------------------------------------------------------------------------|----------------------------|-----|-------------|-------------|
| 1372338_at   | similar to CG9240-PA                                                                                       | LOC687395                  | 0.7 | 0.003140884 | 0.097459196 |
| 1388977_at   | choline/ethanolamine phosphotransferase 1                                                                  | Cept1                      | 0.8 | 0.003147141 | 0.097459196 |
| 1395232_at   | similar to IQ motif and WD repeats 1 (predicted)                                                           | RGD1561961_predicted       | 0.7 | 0.00314911  | 0.097459196 |
| 1370024_at   | Fatty acid binding protein 7, brain                                                                        | Fabp7                      | 0.7 | 0.003154951 | 0.097459196 |
| 1382735_at   | autophagy-related 12 (yeast)                                                                               | Atg12                      | 0.7 | 0.003155072 | 0.097459196 |
| 1371089_at   | glutathione S-transferase Yc2 subunit                                                                      | Yc2                        | 0.8 | 0.003181452 | 0.097873471 |
| 1368877_at   | zinc finger protein 354A                                                                                   | Zfp354a                    | 0.8 | 0.003196199 | 0.097873471 |
| 1393647_at   | histone aminotransferase 1                                                                                 | Hat1                       | 0.8 | 0.003200141 | 0.097873471 |
| 1392506_at   | crystallin, zeta (quinone reductase)-like 1                                                                | Cryz1                      | 0.8 | 0.003201373 | 0.097873471 |
| 1391264_at   | Transcribed locus                                                                                          | ---                        | 0.8 | 0.003202861 | 0.097873471 |
| 1384118_at   | zinc finger protein 329 (predicted)                                                                        | Zfp329_predicted           | 0.7 | 0.003223849 | 0.098163604 |
| 1391985_at   | Nuclear receptor interacting protein 3 (predicted)                                                         | Nrip3_predicted            | 0.6 | 0.003231903 | 0.098233738 |
| 1368405_at   | v-ral simian leukemia viral oncogene homolog A (ras related)                                               | Rala                       | 0.7 | 0.003252302 | 0.098509925 |
| 1380310_at   | similar to hypothetical protein FLJ14007 (predicted)                                                       | RGD1309519_predicted       | 0.8 | 0.003252523 | 0.098509925 |
| 1379826_at   | similar to hypothetical protein MGC31967 (predicted)                                                       | RGD1560252_predicted       | 0.8 | 0.003267751 | 0.098795964 |
| 1390881_at   | actin-binding Rho activating protein                                                                       | Abra                       | 0.6 | 0.00328545  | 0.098971977 |
| 1392599_at   | synapse associated protein 1                                                                               | Syp1                       | 0.8 | 0.003290954 | 0.098971977 |
| 1376606_a_at | similar to e(y)2 protein                                                                                   | LOC682575 ///<br>LOC685258 | 0.8 | 0.003308756 | 0.099332467 |
| 1383577_at   | Transcribed locus                                                                                          | ---                        | 0.8 | 0.003323164 | 0.099589989 |
| 1368164_at   | biliverdin reductase A                                                                                     | Blvra                      | 0.8 | 0.00333888  | 0.099885731 |
| 1382551_at   | similar to Intersectin-2 (SH3 domain-containing protein 1B) (SH3P18) (SH3P18-like WASP-associated protein) | LOC313934                  | 0.6 | 0.003351334 | 0.10000794  |
| 1388171_at   | cyclin-dependent kinase 7 (homolog of Xenopus MO15 cdk-activating kinase)                                  | Cdk7                       | 0.8 | 0.003354675 | 0.10000794  |
| 1382063_at   | galactosidase, alpha                                                                                       | Gla                        | 0.8 | 0.003364004 | 0.100111344 |
| 1391695_at   | ---                                                                                                        | ---                        | 0.8 | 0.003370494 | 0.100130035 |
| 1385282_at   | zinc finger protein 628 (predicted)                                                                        | Zfp628_predicted           | 0.7 | 0.003382101 | 0.100300427 |
| 1385787_at   | ring finger protein 141                                                                                    | rnf141                     | 0.8 | 0.00340284  | 0.10043969  |
| 1396117_at   | similar to leucine zipper protein 2 (predicted)                                                            | RGD1563838_predicted       | 0.6 | 0.003405577 | 0.10043969  |
| 1383912_at   | similar to Protein C6orf115                                                                                | LOC684848 ///<br>LOC685045 | 0.7 | 0.003426626 | 0.10043969  |
| 1389011_at   | similar to RIKEN cDNA 1110014D18                                                                           | RGD1305156                 | 0.8 | 0.003435723 | 0.10043969  |
| 1379275_at   | sorting nexin 10                                                                                           | Snx10                      | 0.7 | 0.003460795 | 0.10043969  |
| 1381958_at   | similar to mKIAA0259 protein (predicted)                                                                   | RGD1562949_predicted       | 0.5 | 0.003463891 | 0.10043969  |
| 1398884_at   | prefoldin 5 (predicted)                                                                                    | Pfdn5_predicted            | 0.8 | 0.003463912 | 0.10043969  |
| 1376704_a_at | neccin-like 2                                                                                              | Ndn12                      | 0.8 | 0.003470057 | 0.10043969  |
| 1376324_at   | Transcribed locus, weakly similar to NP_055333.2 finger protein 229 [Homo sapiens]                         | ---                        | 0.7 | 0.003474703 | 0.10043969  |
| 1368584_a_at | complexin 2                                                                                                | Cplx2                      | 0.7 | 0.003474995 | 0.10043969  |
| 1373913_at   | polyribonucleotide nucleotidyltransferase 1                                                                | Pnpt1                      | 0.8 | 0.003488752 | 0.100666988 |
| 1374515_at   | similar to RIKEN cDNA 6330409N04                                                                           | RGD1306437                 | 0.8 | 0.003511477 | 0.101066225 |
| 1375612_at   | Transcribed locus                                                                                          | ---                        | 0.7 | 0.003517909 | 0.101066225 |
| 1393118_at   | armadillo repeat containing 1 (predicted)                                                                  | Armc1_predicted            | 0.8 | 0.003539544 | 0.101277209 |
| 1377624_at   | claudin 12 (predicted)                                                                                     | Cldn12_predicted           | 0.8 | 0.003549703 | 0.101391987 |
| 1372461_at   | SET translocation (predicted)                                                                              | Set_predicted              | 0.8 | 0.003569589 | 0.101391987 |
| 1373899_at   | similar to dJ842G6.1.1 (novel protein) (predicted)                                                         | RGD1309829_predicted       | 0.8 | 0.003569726 | 0.101391987 |
| 1372827_at   | peptidylprolyl isomerase D (cyclophilin D)                                                                 | Ppid                       | 0.8 | 0.003579169 | 0.101391987 |
| 1381878_at   | ubiquitin 1 (predicted)                                                                                    | Ubn1_predicted             | 0.7 | 0.003619423 | 0.101907022 |
| 1382193_at   | similar to RIKEN cDNA 1500009M05 (predicted)                                                               | RGD1566242_predicted       | 0.6 | 0.003630279 | 0.101907022 |
| 1392663_at   | Transcribed locus, strongly similar to XP_001065986.1 hypothetical protein [Rattus norvegicus]             | ---                        | 0.8 | 0.00364784  | 0.102151478 |
| 1386078_at   | solute carrier family 35 (CMP-sialic acid transporter), member 1 (predicted)                               | Slc35a1_predicted          | 0.8 | 0.003677168 | 0.102267664 |
| 1395053_at   | androgen-induced proliferation inhibitor (predicted)                                                       | Aprin_predicted            | 0.7 | 0.003687743 | 0.102267664 |
| 1395998_at   | nucleolar protein 5A                                                                                       | Nol5a                      | 0.7 | 0.003690958 | 0.102267664 |

|              |                                                        |                      |     |             |             |
|--------------|--------------------------------------------------------|----------------------|-----|-------------|-------------|
| 1384323_at   | proteasome (prosome, macropain) 26S subunit, ATPase, 6 | Psmc6                | 0.7 | 0.003700573 | 0.102267664 |
| 1392551_at   | zinc finger protein ZFP                                | LOC503192            | 0.8 | 0.003702528 | 0.102267664 |
| 1370088_at   | sperm autoantigenic protein 17                         | Spa17                | 0.8 | 0.003711858 | 0.102267664 |
| 1393550_at   | CAMP responsive element modulator                      | Crem                 | 0.8 | 0.003758338 | 0.102371868 |
| 1390851_at   | Lactamase, beta 2                                      | Lactb2               | 0.8 | 0.003773214 | 0.102371868 |
| 1382452_at   | serum deprivation response protein                     | Sdpr                 | 0.6 | 0.003785381 | 0.102371868 |
| 1394318_at   | ---                                                    | ---                  | 0.8 | 0.003794051 | 0.102371868 |
| 1384166_a_at | ---                                                    | ---                  | 0.8 | 0.003802495 | 0.102371868 |
| 1379850_at   | proteasome (prosome, macropain) 26S subunit, ATPase, 6 | Psmc6                | 0.7 | 0.003807203 | 0.102371868 |
| 1367818_at   | coenzyme Q3 homolog, methyltransferase (yeast)         | Coq3                 | 0.8 | 0.003810446 | 0.102371868 |
| 1377111_at   | Similar to TAK1-binding protein 3 isoform 1            | LOC317546            | 0.6 | 0.003816892 | 0.102371868 |
| 1395058_at   | WD repeat domain 75                                    | Wdr75                | 0.6 | 0.003820882 | 0.102371868 |
| 1390933_a_at | RNA (guanine-9-) methyltransferase domain containing 3 | Rg9mtd3              | 0.8 | 0.003821123 | 0.102371868 |
| 1382371_at   | transmembrane protein 77                               | Tmem77               | 0.7 | 0.003835012 | 0.102371868 |
| 1376659_at   | nucleotide binding protein-like (predicted)            | Nubpl_predicted      | 0.8 | 0.003853362 | 0.10243669  |
| 1391342_at   | Transcribed locus                                      | ---                  | 0.8 | 0.003881117 | 0.102461219 |
| 1391578_at   | similar to modulator of estrogen induced transcription | RGD1307526           | 0.7 | 0.003886832 | 0.102461219 |
| 1385334_at   | Transcribed locus                                      | ---                  | 0.8 | 0.003893305 | 0.102473707 |
| 1373074_at   | similar to RIKEN cDNA 2700002I20                       | RGD1307279           | 0.8 | 0.003915895 | 0.102525381 |
| 1375215_x_at | pyroglutamyl-peptidase I                               | Pgpep1               | 0.8 | 0.003919721 | 0.102525381 |
| 1373592_at   | similar to SPI6                                        | MGC94010             | 0.8 | 0.003920853 | 0.102525381 |
| 1393167_at   | ---                                                    | ---                  | 0.5 | 0.003925278 | 0.102525381 |
| 1375425_at   | hypothetical LOC287541 (predicted)                     | RGD1309400_predicted | 0.8 | 0.003954967 | 0.103143121 |
| 1388313_at   | ribosomal protein s25                                  | Rps25                | 0.8 | 0.003979065 | 0.103613408 |

**Supplementary table 3:** Probe sets identified as up-regulated 10% FDR ( $p < 0.03$ ) and  $> 1.2$  fold in the L5 DRGs of SNT animals

| Probe set ID | Gene Title                                                                                                                                              | Gene Symbol                                                                      | Fold increase | p value  | FDR value |
|--------------|---------------------------------------------------------------------------------------------------------------------------------------------------------|----------------------------------------------------------------------------------|---------------|----------|-----------|
| 1368266_at   | arginase 1                                                                                                                                              | Arg1                                                                             | 18.0          | 2.08E-09 | 1.68E-05  |
| 1368892_at   | Adenylate cyclase activating polypeptide 1 (Adcyap1) mRNA, 3' UTR                                                                                       | ---                                                                              | 3.9           | 3.42E-09 | 1.68E-05  |
| 1384803_at   | late cornified envelope 1F (predicted) /// RGD1561089 (predicted) /// late cornified envelope 1S (predicted) /// late cornified envelope 1L (predicted) | Lce1f_predicted /// Lce1l_predicted /// Lce1s_predicted /// RGD1561089_predicted | 22.6          | 3.88E-09 | 1.68E-05  |
| 1394908_at   | Adenylate cyclase activating polypeptide 1 (Adcyap1) mRNA, 3' UTR                                                                                       | ---                                                                              | 5.8           | 4.31E-09 | 1.68E-05  |
| 1376390_at   | membrane-spanning 4-domains, subfamily A, member 11 (predicted)                                                                                         | Ms4a11_predicted                                                                 | 11.2          | 8.14E-09 | 2.23E-05  |
| 1396451_at   | Transcribed locus                                                                                                                                       | ---                                                                              | 6.8           | 1.06E-08 | 2.29E-05  |
| 1368238_at   | pancreatitis-associated protein                                                                                                                         | Pap                                                                              | 22.3          | 1.11E-08 | 2.29E-05  |
| 1379573_at   | ---                                                                                                                                                     | ---                                                                              | 7.2           | 1.54E-08 | 2.62E-05  |
| 1370249_at   | benzodiazepine receptor, peripheral                                                                                                                     | Bzrp                                                                             | 5.3           | 1.59E-08 | 2.62E-05  |
| 1378925_at   | ---                                                                                                                                                     | ---                                                                              | 2.9           | 2.21E-08 | 3.31E-05  |
| 1373032_at   | musculoskeletal, embryonic nuclear protein 1                                                                                                            | Mustn1                                                                           | 4.7           | 2.76E-08 | 3.79E-05  |
| 1393573_at   | phosphodiesterase 6B, cGMP, rod receptor, beta polypeptide (predicted)                                                                                  | Pde6b_predicted                                                                  | 8.7           | 4.22E-08 | 5.24E-05  |
| 1397823_at   | Calcium channel, voltage-dependent, alpha2/delta subunit 1                                                                                              | Cacna2d1                                                                         | 5.6           | 4.71E-08 | 5.24E-05  |
| 1380100_at   | similar to Traf2 and NCK interacting kinase, splice variant 4 (predicted)                                                                               | RGD1561817_predicted                                                             | 3.4           | 4.78E-08 | 5.24E-05  |
| 1388385_at   | crystallin, beta A2                                                                                                                                     | Cryba2                                                                           | 5.1           | 5.87E-08 | 5.44E-05  |
| 1370628_at   | granzyme B                                                                                                                                              | Gzmb                                                                             | 15.5          | 6.12E-08 | 5.44E-05  |
| 1378057_at   | fibronectin leucine rich transmembrane protein 3 (predicted)                                                                                            | Flrt3_predicted                                                                  | 6.0           | 6.44E-08 | 5.44E-05  |
| 1368000_at   | complement component 3                                                                                                                                  | C3                                                                               | 6.4           | 6.89E-08 | 5.44E-05  |
| 1371248_at   | similar to Cornifin A (Small proline-rich protein 1A) (SPR1A) (SPRR1)                                                                                   | LOC499660                                                                        | 19.5          | 7.06E-08 | 5.44E-05  |
| 1373911_at   | periostin, osteoblast specific factor (predicted)                                                                                                       | Postn_predicted                                                                  | 12.6          | 7.59E-08 | 5.44E-05  |
| 1387908_at   | RAS, dexamethasone-induced 1                                                                                                                            | Rasd1                                                                            | 8.5           | 7.76E-08 | 5.44E-05  |
| 1382017_at   | ---                                                                                                                                                     | ---                                                                              | 7.4           | 8.15E-08 | 5.44E-05  |
| 1369224_at   | cadherin 17                                                                                                                                             | Cdh17                                                                            | 3.2           | 8.39E-08 | 5.44E-05  |
| 1392722_at   | Transcribed locus                                                                                                                                       | ---                                                                              | 2.6           | 8.60E-08 | 5.44E-05  |
| 1387088_at   | galanin                                                                                                                                                 | Gal                                                                              | 6.8           | 8.96E-08 | 5.46E-05  |
| 1383805_at   | similar to Traf2 and NCK interacting kinase, splice variant 4 (predicted)                                                                               | RGD1561817_predicted                                                             | 3.7           | 9.43E-08 | 5.54E-05  |
| 1386967_at   | ras homolog gene family, member Q                                                                                                                       | Rhoq                                                                             | 3.0           | 9.93E-08 | 5.63E-05  |
| 1383536_at   | Dihydrofolate reductase                                                                                                                                 | Dhfr                                                                             | 3.9           | 1.20E-07 | 5.82E-05  |
| 1392794_at   | Transcribed locus                                                                                                                                       | ---                                                                              | 3.2           | 1.21E-07 | 5.82E-05  |
| 1379766_at   | Src-like adaptor                                                                                                                                        | Sla                                                                              | 7.1           | 1.28E-07 | 5.82E-05  |
| 1376601_at   | sema domain, transmembrane domain (TM), and cytoplasmic domain, (semaphorin) 6A (predicted)                                                             | Sema6a_predicted                                                                 | 7.2           | 1.32E-07 | 5.82E-05  |
| 1384035_at   | similar to liver-specific bHLH-Zip transcription factor                                                                                                 | LOC685277 /// LOC686794                                                          | 12.9          | 1.33E-07 | 5.82E-05  |
| 1392863_at   | fibronectin leucine rich transmembrane protein 3 (predicted)                                                                                            | Flrt3_predicted                                                                  | 11.8          | 1.35E-07 | 5.82E-05  |
| 1387444_at   | protein tyrosine phosphatase, receptor type, H                                                                                                          | Ptprh                                                                            | 3.6           | 1.36E-07 | 5.82E-05  |
| 1367974_at   | annexin A3                                                                                                                                              | Anxa3                                                                            | 4.7           | 1.40E-07 | 5.82E-05  |
| 1370391_at   | cellular retinoic acid binding protein 2                                                                                                                | Crabp2                                                                           | 4.4           | 1.41E-07 | 5.82E-05  |
| 1383391_a_at | complement component 2                                                                                                                                  | C2                                                                               | 6.5           | 1.42E-07 | 5.82E-05  |
| 1379794_at   | granzyme B                                                                                                                                              | Gzmb                                                                             | 18.8          | 1.49E-07 | 5.99E-05  |
| 1390713_at   | Transcribed locus                                                                                                                                       | ---                                                                              | 4.5           | 1.75E-07 | 6.70E-05  |
| 1373781_a_at | similar to suprabasal-specific protein suprabasin (predicted)                                                                                           | RGD1562305_predicted                                                             | 5.1           | 2.13E-07 | 7.95E-05  |
| 1368010_at   | protein tyrosine phosphatase, non-receptor type 6                                                                                                       | Ptpn6                                                                            | 2.6           | 2.29E-07 | 8.25E-05  |
| 1386552_at   | Transcribed locus                                                                                                                                       | ---                                                                              | 4.2           | 2.31E-07 | 8.25E-05  |
| 1369904_at   | gamma-aminobutyric acid (GABA-A) receptor, subunit beta 1                                                                                               | Gabrb1                                                                           | 2.6           | 2.52E-07 | 8.81E-05  |



|              |                                                                                                |                      |      |          |             |
|--------------|------------------------------------------------------------------------------------------------|----------------------|------|----------|-------------|
| 1388337_at   | nucleoside phosphorylase                                                                       | Np                   | 2.2  | 2.69E-07 | 9.22E-05    |
| 1389696_at   | Transcribed locus                                                                              | ---                  | 6.3  | 2.80E-07 | 9.39E-05    |
| 1368558_s_at | allograft inflammatory factor 1                                                                | Aif1                 | 8.9  | 2.94E-07 | 9.66E-05    |
| 1368657_at   | matrix metalloproteinase 3                                                                     | Mmp3                 | 7.9  | 3.60E-07 | 0.000115986 |
| 1370154_at   | lysozyme                                                                                       | Lyz                  | 5.5  | 4.13E-07 | 0.000130696 |
| 1389123_at   | chemokine (C-C motif) ligand 6                                                                 | Ccl6                 | 5.2  | 4.35E-07 | 0.000133136 |
| 1370315_a_at | stathmin-like 4                                                                                | Stmn4                | 4.0  | 4.43E-07 | 0.000133136 |
| 1382692_at   | similar to Clecsf12 protein (predicted)                                                        | RGD1565140_predicted | 11.8 | 4.47E-07 | 0.000133136 |
| 1367664_at   | ankyrin repeat domain 1 (cardiac muscle)                                                       | Ankrd1               | 11.0 | 4.53E-07 | 0.000133136 |
| 1384036_s_at | ---                                                                                            | ---                  | 6.8  | 4.65E-07 | 0.000133136 |
| 1373544_at   | chemokine (C-X-C motif) ligand 9                                                               | Cxcl9                | 11.6 | 4.70E-07 | 0.000133136 |
| 1388496_at   | filamin C, gamma (actin binding protein 280) (predicted)                                       | Finc_predicted       | 6.3  | 4.78E-07 | 0.000133136 |
| 1390226_at   | similar to hypothetical protein LOC340061 (predicted)                                          | RGD1562552_predicted | 2.2  | 5.04E-07 | 0.000138183 |
| 1370177_at   | poliovirus receptor                                                                            | PVR                  | 5.4  | 5.47E-07 | 0.000142833 |
| 1389553_at   | dendritic cell inhibitory receptor 3                                                           | Dcir3                | 8.8  | 5.50E-07 | 0.000142833 |
| 1394077_at   | Rho family GTPase 3                                                                            | Rnd3                 | 2.9  | 5.55E-07 | 0.000142833 |
| 1377994_at   | Transcribed locus                                                                              | ---                  | 3.5  | 5.56E-07 | 0.000142833 |
| 1369843_at   | cholinergic receptor, nicotinic, alpha polypeptide 1 (muscle)                                  | Chrna1               | 3.5  | 5.87E-07 | 0.00014858  |
| 1368420_at   | ceruloplasmin                                                                                  | Cp                   | 4.9  | 6.65E-07 | 0.000165794 |
| 1387029_at   | complement component factor H                                                                  | Cfh                  | 5.9  | 7.11E-07 | 0.000173276 |
| 1371079_at   | Fc receptor, IgG, low affinity IIb                                                             | Fcgr2b               | 6.6  | 7.16E-07 | 0.000173276 |
| 1373161_at   | transmembrane protein 98                                                                       | Tmem98               | 2.6  | 7.66E-07 | 0.000179505 |
| 1374276_at   | Similar to liver-specific bHLH-Zip transcription factor                                        | LOC685277            | 7.4  | 7.75E-07 | 0.000179505 |
| 1393280_at   | lymphocyte antigen 86 (predicted)                                                              | Ly86_predicted       | 3.1  | 8.59E-07 | 0.000190087 |
| 1379381_at   | Transcribed locus                                                                              | ---                  | 5.3  | 8.66E-07 | 0.000190087 |
| 1394451_at   | annexin A1                                                                                     | Anxa1                | 3.4  | 8.82E-07 | 0.000190087 |
| 1395389_at   | ST3 beta-galactoside alpha-2,3-sialyltransferase 6                                             | St3gal6              | 3.4  | 8.83E-07 | 0.000190087 |
| 1383241_at   | complement component 1, r subcomponent                                                         | C1r                  | 3.5  | 9.01E-07 | 0.000190087 |
| 1395313_s_at | Annexin A3                                                                                     | Anxa3                | 3.7  | 9.01E-07 | 0.000190087 |
| 1370382_at   | RT1 class II, locus Bb                                                                         | RT1-Bb               | 3.6  | 9.45E-07 | 0.00019684  |
| 1397958_at   | Transcribed locus                                                                              | ---                  | 3.8  | 1.02E-06 | 0.000207881 |
| 1391605_at   | Transcribed locus                                                                              | ---                  | 2.7  | 1.04E-06 | 0.000207881 |
| 1390649_at   | solute carrier family 30 (zinc transporter), member 3                                          | Slc30a3              | 3.3  | 1.05E-06 | 0.000207881 |
| 1378700_at   | Transcribed locus                                                                              | ---                  | 3.5  | 1.06E-06 | 0.000207881 |
| 1393038_at   | Fc receptor, IgG, high affinity I                                                              | Fcgr1                | 3.7  | 1.06E-06 | 0.000207881 |
| 1381089_at   | Transcribed locus                                                                              | ---                  | 7.6  | 1.14E-06 | 0.000211994 |
| 1383210_at   | Transcribed locus                                                                              | ---                  | 7.6  | 1.15E-06 | 0.000211994 |
| 1372599_at   | microsomal glutathione S-transferase 2 (predicted)                                             | Mgst2_predicted      | 3.1  | 1.16E-06 | 0.000211994 |
| 1375633_at   | chloride intracellular channel 1                                                               | Clic1                | 2.6  | 1.16E-06 | 0.000211994 |
| 1393550_at   | CAMP responsive element modulator                                                              | Crem                 | 2.5  | 1.19E-06 | 0.000211994 |
| 1377916_at   | schlafen 2 (predicted)                                                                         | Sfn2_predicted       | 4.3  | 1.20E-06 | 0.000211994 |
| 1368223_at   | a disintegrin-like and metalloproteinase (reprolysin type) with thrombospondin type 1 motif, 1 | Adams1               | 3.2  | 1.21E-06 | 0.000211994 |
| 1382868_at   | sema domain, transmembrane domain (TM), and cytoplasmic domain, (semaphorin) 6A (predicted)    | Sema6a_predicted     | 10.7 | 1.21E-06 | 0.000211994 |
| 1368188_at   | 4-hydroxyphenylpyruvic acid dioxygenase                                                        | Hpd                  | 5.5  | 1.40E-06 | 0.000236121 |
| 1391582_at   | Transcribed locus                                                                              | ---                  | 2.4  | 1.41E-06 | 0.000236121 |
| 1389350_at   | apolipoprotein H                                                                               | Apoh                 | 2.5  | 1.54E-06 | 0.000251478 |
| 1368590_at   | matrix metalloproteinase 16                                                                    | Mmp16                | 4.7  | 1.55E-06 | 0.000251478 |
| 1391637_at   | similar to RIKEN cDNA 5830480G12                                                               | LOC295635            | 2.9  | 1.56E-06 | 0.000251478 |
| 1381070_at   | ---                                                                                            | ---                  | 12.7 | 1.61E-06 | 0.000257469 |
| 1388451_at   | Transcribed locus                                                                              | ---                  | 3.2  | 1.74E-06 | 0.0002692   |
| 1374529_at   | Thrombospondin 1                                                                               | Thbs1                | 5.0  | 1.75E-06 | 0.0002692   |
| 1368406_at   | steroidogenic acute regulatory protein                                                         | Star                 | 2.4  | 1.86E-06 | 0.000281113 |
| 1398202_at   | Transcribed locus                                                                              | ---                  | 6.3  | 1.90E-06 | 0.000281227 |

|            |                                                                                                     |                      |     |          |             |
|------------|-----------------------------------------------------------------------------------------------------|----------------------|-----|----------|-------------|
| 1390937_at | similar to chromosome 14 open reading frame 50                                                      | RGD1309051           | 2.1 | 1.92E-06 | 0.000282603 |
| 1376562_at | similar to Traf2 and NCK interacting kinase, splice variant 4 (predicted)                           | RGD1561817_predicted | 6.6 | 1.97E-06 | 0.000286822 |
| 1369979_at | src family associated phosphoprotein 2                                                              | Scap2                | 3.6 | 2.13E-06 | 0.000292875 |
| 1376055_at | minichromosome maintenance deficient 5, cell division cycle 46 ( <i>S. cerevisiae</i> ) (predicted) | Mcm5_predicted       | 4.6 | 2.14E-06 | 0.000292875 |
| 1394568_at | similar to DNA segment, Chr 10, Wayne State University 102, expressed (predicted)                   | RGD1563365_predicted | 2.1 | 2.14E-06 | 0.000292875 |
| 1390510_at | membrane-spanning 4-domains, subfamily A, member 6B                                                 | Ms4a6b               | 7.7 | 2.15E-06 | 0.000292875 |
| 1371785_at | tumor necrosis factor receptor superfamily, member 12a                                              | Tnfrsf12a            | 3.5 | 2.17E-06 | 0.000292875 |
| 1376693_at | similar to OEF2 (predicted)                                                                         | RGD1563091_predicted | 2.6 | 2.17E-06 | 0.000292875 |
| 1372516_at | kinesin family member 22                                                                            | Kif22                | 4.0 | 2.19E-06 | 0.000292875 |
| 1370118_at | chemokine (C-C motif) ligand 17                                                                     | Ccl17                | 2.5 | 2.25E-06 | 0.000297935 |
| 1375043_at | FBJ murine osteosarcoma viral oncogene homolog                                                      | Fos                  | 6.5 | 2.30E-06 | 0.000300604 |
| 1393477_at | ---                                                                                                 | ---                  | 5.0 | 2.33E-06 | 0.000301977 |
| 1393641_at | B-cell linker                                                                                       | Blnk                 | 4.0 | 2.45E-06 | 0.000314033 |
| 1383786_at | Transcribed locus                                                                                   | ---                  | 3.8 | 2.46E-06 | 0.000314033 |
| 1393722_at | fem-1 homolog c ( <i>C.elegans</i> ) (predicted)                                                    | Fem1c_predicted      | 2.1 | 2.53E-06 | 0.000320146 |
| 1398656_at | ---                                                                                                 | ---                  | 2.2 | 2.62E-06 | 0.0003285   |
| 1375951_at | thrombomodulin                                                                                      | Thbd                 | 4.5 | 2.70E-06 | 0.000333693 |
| 1387005_at | cathepsin S                                                                                         | Ctss                 | 6.9 | 2.74E-06 | 0.000334824 |
| 1388742_at | ---                                                                                                 | ---                  | 3.8 | 2.75E-06 | 0.000334824 |
| 1371913_at | transforming growth factor, beta induced                                                            | Tgfb1                | 3.6 | 2.78E-06 | 0.000335206 |
| 1369725_at | centaurin, alpha 2                                                                                  | Centa2               | 2.2 | 2.79E-06 | 0.000335206 |
| 1376636_at | transforming growth factor, beta receptor 1                                                         | Tgfb1                | 2.6 | 2.90E-06 | 0.000341135 |
| 1387154_at | neuropeptide Y                                                                                      | Npy                  | 8.6 | 2.90E-06 | 0.000341135 |
| 1373513_at | Transcribed locus                                                                                   | ---                  | 4.3 | 2.96E-06 | 0.000345832 |
| 1383372_at | platelet-activating factor receptor                                                                 | Ptafr                | 2.2 | 3.19E-06 | 0.000361299 |
| 1367849_at | syndecan 1                                                                                          | Sdc1                 | 4.7 | 3.23E-06 | 0.000361299 |
| 1369691_at | sodium channel, voltage-gated, type III, alpha polypeptide                                          | Scn3a                | 5.5 | 3.33E-06 | 0.000370614 |
| 1373490_at | glia maturation factor, gamma                                                                       | Gmfg                 | 4.3 | 3.45E-06 | 0.000375797 |
| 1371377_at | ribosomal protein S19                                                                               | Rps19                | 2.0 | 3.47E-06 | 0.000375797 |
| 1393679_at | Transcribed locus                                                                                   | ---                  | 2.0 | 3.50E-06 | 0.000375879 |
| 1373373_at | Transcribed locus                                                                                   | ---                  | 2.7 | 3.52E-06 | 0.000376367 |
| 1392946_at | Transcribed locus                                                                                   | ---                  | 2.8 | 3.58E-06 | 0.000377436 |
| 1382960_at | Transcribed locus                                                                                   | ---                  | 6.0 | 3.66E-06 | 0.000378299 |
| 1388419_at | ---                                                                                                 | ---                  | 2.5 | 3.84E-06 | 0.00038745  |
| 1373403_at | similar to Protein C8orf4 (Thyroid cancer protein 1) (TC-1)                                         | LOC684871            | 4.5 | 3.97E-06 | 0.000396667 |
| 1383556_at | Transcribed locus                                                                                   | ---                  | 2.2 | 3.98E-06 | 0.000396667 |
| 1384013_at | cell adhesion molecule with homology to L1CAM                                                       | Chl1                 | 3.2 | 4.03E-06 | 0.000396667 |
| 1383688_at | Transcribed locus                                                                                   | ---                  | 2.8 | 4.04E-06 | 0.000396667 |
| 1372777_at | Transcribed locus                                                                                   | ---                  | 2.0 | 4.10E-06 | 0.000396667 |
| 1380180_at | Transcribed locus                                                                                   | ---                  | 3.9 | 4.10E-06 | 0.000396667 |
| 1374273_at | Coxsackie virus and adenovirus receptor                                                             | Cxadr                | 3.4 | 4.15E-06 | 0.000396667 |
| 1371450_at | Transcribed locus                                                                                   | ---                  | 4.4 | 4.16E-06 | 0.000396667 |
| 1389659_at | similar to ctla-2-beta protein (141 AA) (predicted)                                                 | RGD1565540_predicted | 3.1 | 4.17E-06 | 0.000396667 |
| 1379957_at | schlafen 8                                                                                          | Slnf8                | 4.2 | 4.40E-06 | 0.000411097 |
| 1377663_at | Rho family GTPase 3                                                                                 | Rnd3                 | 2.6 | 4.44E-06 | 0.000411097 |
| 1369029_at | phospholipid scramblase 1                                                                           | Plscr1               | 2.8 | 4.45E-06 | 0.000411097 |
| 1373769_at | phosphoglucomutase 1 (predicted)                                                                    | Pgm1_predicted       | 1.8 | 4.55E-06 | 0.000411097 |
| 1389423_at | Discoidin domain receptor family, member 2                                                          | Ddr2                 | 2.3 | 4.69E-06 | 0.000418841 |
| 1376911_at | Transcribed locus                                                                                   | ---                  | 2.9 | 4.80E-06 | 0.000427129 |
| 1383574_at | mannosidase 1, alpha (predicted)                                                                    | Man1a_predicted      | 3.1 | 4.89E-06 | 0.000432603 |
| 1398871_at | ribosomal protein L17                                                                               | Rpl17                | 2.0 | 4.99E-06 | 0.000438741 |
| 1368321_at | early growth response 1                                                                             | Egr1                 | 2.4 | 5.18E-06 | 0.000450902 |

|              |                                                                                                                                                        |                                                                                                                               |      |          |             |
|--------------|--------------------------------------------------------------------------------------------------------------------------------------------------------|-------------------------------------------------------------------------------------------------------------------------------|------|----------|-------------|
| 1368421_at   | protein tyrosine phosphatase, non-receptor type 5                                                                                                      | Ptpn5                                                                                                                         | 4.6  | 5.22E-06 | 0.000451797 |
| 1367939_at   | retinol binding protein 1, cellular                                                                                                                    | Rbp1                                                                                                                          | 4.7  | 5.30E-06 | 0.000456509 |
| 1373680_at   | Transcribed locus                                                                                                                                      | ---                                                                                                                           | 3.3  | 5.44E-06 | 0.000457863 |
| 1373679_at   | Transcribed locus                                                                                                                                      | ---                                                                                                                           | 1.8  | 5.47E-06 | 0.000457863 |
| 1369713_at   | cholecystokinin B receptor                                                                                                                             | Cckbr                                                                                                                         | 3.0  | 5.48E-06 | 0.000457863 |
| 1371988_at   | mannosidase 1, alpha (predicted)                                                                                                                       | Man1a_predicted                                                                                                               | 2.4  | 5.48E-06 | 0.000457863 |
| 1374539_at   | similar to Probable phospholipid-transporting ATPase VD (ATPVD)                                                                                        | LOC360932                                                                                                                     | 3.4  | 5.52E-06 | 0.000458149 |
| 1384343_at   | ---                                                                                                                                                    | ---                                                                                                                           | 2.0  | 5.69E-06 | 0.000468032 |
| 1376100_at   | tubulin, beta 6                                                                                                                                        | Tubb6                                                                                                                         | 3.2  | 5.73E-06 | 0.000468594 |
| 1374778_at   | ---                                                                                                                                                    | ---                                                                                                                           | 2.5  | 5.77E-06 | 0.000469937 |
| 1383232_at   | ---                                                                                                                                                    | ---                                                                                                                           | 2.0  | 5.80E-06 | 0.000470293 |
| 1371336_at   | hematological and neurological expressed sequence 1                                                                                                    | Hn1                                                                                                                           | 2.2  | 5.85E-06 | 0.000471627 |
| 1373290_at   | similar to Enhancer of zeste homolog 2 (ENX-1)                                                                                                         | LOC312299                                                                                                                     | 3.9  | 5.93E-06 | 0.000475179 |
| 1373035_at   | ---                                                                                                                                                    | ---                                                                                                                           | 2.3  | 5.95E-06 | 0.000475179 |
| 1368207_at   | FXYD domain-containing ion transport regulator 5                                                                                                       | Fxyd5                                                                                                                         | 2.8  | 6.01E-06 | 0.000477276 |
| 1379967_at   | zinc finger protein 367                                                                                                                                | Zfp367                                                                                                                        | 2.6  | 6.04E-06 | 0.000477395 |
| 1369182_at   | coagulation factor III                                                                                                                                 | F3                                                                                                                            | 3.4  | 6.10E-06 | 0.000479668 |
| 1382931_at   | Transcribed locus                                                                                                                                      | ---                                                                                                                           | 3.7  | 6.26E-06 | 0.000487648 |
| 1391464_at   | Transcribed locus                                                                                                                                      | ---                                                                                                                           | 4.7  | 6.44E-06 | 0.000497832 |
| 1372686_at   | hypothetical protein LOC682709 /// hypothetical protein LOC689623                                                                                      | LOC682709 /// LOC689623                                                                                                       | 1.9  | 6.45E-06 | 0.000497832 |
| 1381311_at   | EGF-like module containing, mucin-like, hormone receptor-like sequence 1                                                                               | Emr1                                                                                                                          | 4.8  | 6.59E-06 | 0.000505576 |
| 1373025_at   | complement component 1, q subcomponent, gamma polypeptide                                                                                              | C1qg                                                                                                                          | 6.0  | 6.62E-06 | 0.000505576 |
| 1371573_at   | ribosomal protein L36a (predicted) /// similar to large subunit ribosomal protein L36a (predicted) /// similar to large subunit ribosomal protein L36a | LOC680395 /// LOC682278 /// LOC682326 /// LOC685642 /// LOC687717 /// LOC691991 /// RGD1566235_predicted /// Rpl36a_predicted | 1.9  | 6.73E-06 | 0.000505576 |
| 1389873_at   | PYD and CARD domain containing                                                                                                                         | Pycard                                                                                                                        | 2.2  | 6.73E-06 | 0.000505576 |
| 1369131_at   | solute carrier family 18 (vesicular monoamine), member 2                                                                                               | Slc18a2                                                                                                                       | 2.7  | 6.96E-06 | 0.000519935 |
| 1376662_at   | Transcribed locus                                                                                                                                      | ---                                                                                                                           | 2.0  | 7.01E-06 | 0.000519935 |
| 1390050_at   | similar to Golgi phosphoprotein 2 (Golgi membrane protein GP73)                                                                                        | LOC680692 /// LOC682869                                                                                                       | 2.3  | 7.02E-06 | 0.000519935 |
| 1392440_at   | Transcribed locus                                                                                                                                      | ---                                                                                                                           | 2.9  | 7.13E-06 | 0.00052578  |
| 1374137_at   | Transcribed locus                                                                                                                                      | ---                                                                                                                           | 2.6  | 7.21E-06 | 0.00052578  |
| 1397676_at   | ---                                                                                                                                                    | ---                                                                                                                           | 2.9  | 7.24E-06 | 0.00052578  |
| 1386529_at   | Transcribed locus                                                                                                                                      | ---                                                                                                                           | 3.9  | 7.47E-06 | 0.000536604 |
| 1371295_at   | ribosomal protein S20                                                                                                                                  | Rps20                                                                                                                         | 1.8  | 7.70E-06 | 0.000550312 |
| 1370051_at   | transglutaminase 1                                                                                                                                     | Tgm1                                                                                                                          | 3.0  | 7.85E-06 | 0.000554362 |
| 1383355_at   | ATP-binding cassette, sub-family A (ABC1), member 1                                                                                                    | Abca1                                                                                                                         | 2.7  | 8.00E-06 | 0.000556387 |
| 1378128_at   | Grainyhead-like 1 (Drosophila) (predicted)                                                                                                             | Grhl1_predicted                                                                                                               | 2.9  | 8.01E-06 | 0.000556387 |
| 1367960_at   | ADP-ribosylation factor-like 4A                                                                                                                        | Arl4a                                                                                                                         | 2.9  | 8.02E-06 | 0.000556387 |
| 1367847_at   | nuclear protein 1                                                                                                                                      | Nupr1                                                                                                                         | 4.6  | 8.08E-06 | 0.00055806  |
| 1393469_at   | ---                                                                                                                                                    | ---                                                                                                                           | 2.3  | 8.15E-06 | 0.000561043 |
| 1382206_a_at | A kinase (PRKA) anchor protein 2                                                                                                                       | Akap2                                                                                                                         | 2.5  | 8.28E-06 | 0.000567144 |
| 1376652_at   | complement component 1, q subcomponent, alpha polypeptide                                                                                              | C1qa                                                                                                                          | 6.6  | 8.31E-06 | 0.000567144 |
| 1398243_at   | cysteine and glycine-rich protein 3                                                                                                                    | Csrp3                                                                                                                         | 16.7 | 8.93E-06 | 0.000601954 |
| 1367640_at   | ribosomal protein S12                                                                                                                                  | Rps12                                                                                                                         | 1.9  | 9.17E-06 | 0.000613307 |
| 1398407_at   | tumor necrosis factor, alpha-induced protein 8 (predicted)                                                                                             | Tnfaip8_predicted                                                                                                             | 3.2  | 9.42E-06 | 0.000627436 |
| 1389581_at   | similar to RIKEN cDNA 9230117N10                                                                                                                       | RGD1311155                                                                                                                    | 2.8  | 9.62E-06 | 0.000634742 |
| 1376319_at   | Transcribed locus                                                                                                                                      | ---                                                                                                                           | 3.6  | 9.70E-06 | 0.000635949 |
| 1375661_at   | Transcribed locus                                                                                                                                      | ---                                                                                                                           | 4.9  | 9.77E-06 | 0.0006374   |

|              |                                                                                                                                                                                                                                                                                                                                                                                                                                   |                                                                                      |      |          |             |
|--------------|-----------------------------------------------------------------------------------------------------------------------------------------------------------------------------------------------------------------------------------------------------------------------------------------------------------------------------------------------------------------------------------------------------------------------------------|--------------------------------------------------------------------------------------|------|----------|-------------|
| 1368295_at   | solute carrier organic anion transporter family, member 2b1                                                                                                                                                                                                                                                                                                                                                                       | Slco2b1                                                                              | 2.4  | 1.00E-05 | 0.000644131 |
| 1385557_at   | ---                                                                                                                                                                                                                                                                                                                                                                                                                               | ---                                                                                  | 2.3  | 1.01E-05 | 0.000645885 |
| 1385672_at   | Calcium/calmodulin-dependent protein kinase II, delta                                                                                                                                                                                                                                                                                                                                                                             | Camk2d                                                                               | 2.7  | 1.02E-05 | 0.000648767 |
| 1372187_at   | protein kinase C, nu                                                                                                                                                                                                                                                                                                                                                                                                              | Prkcn                                                                                | 2.0  | 1.03E-05 | 0.000650391 |
| 1389373_at   | MAD homolog 1 (Drosophila)                                                                                                                                                                                                                                                                                                                                                                                                        | Smad1                                                                                | 2.2  | 1.03E-05 | 0.000650391 |
| 1368356_a_at | type 1 tumor necrosis factor receptor shedding aminopeptidase regulator                                                                                                                                                                                                                                                                                                                                                           | Arts1                                                                                | 1.9  | 1.05E-05 | 0.000659603 |
| 1382950_at   | Transcribed locus                                                                                                                                                                                                                                                                                                                                                                                                                 | ---                                                                                  | 5.2  | 1.05E-05 | 0.000659603 |
| 1367568_a_at | matrix Gla protein                                                                                                                                                                                                                                                                                                                                                                                                                | Mgp                                                                                  | 3.8  | 1.07E-05 | 0.000666305 |
| 1388784_at   | colony stimulating factor 1 receptor                                                                                                                                                                                                                                                                                                                                                                                              | Csf1r                                                                                | 2.4  | 1.10E-05 | 0.000683052 |
| 1372031_at   | Transcribed locus                                                                                                                                                                                                                                                                                                                                                                                                                 | ---                                                                                  | 3.7  | 1.12E-05 | 0.000687355 |
| 1398727_at   | CDNA clone IMAGE:7374368                                                                                                                                                                                                                                                                                                                                                                                                          | ---                                                                                  | 2.7  | 1.12E-05 | 0.000688063 |
| 1397304_at   | interferon gamma induced GTPase                                                                                                                                                                                                                                                                                                                                                                                                   | Igtp                                                                                 | 4.2  | 1.13E-05 | 0.000688063 |
| 1388944_at   | Transcribed locus                                                                                                                                                                                                                                                                                                                                                                                                                 | ---                                                                                  | 3.8  | 1.18E-05 | 0.000708701 |
| 1370941_at   | platelet derived growth factor receptor, alpha polypeptide                                                                                                                                                                                                                                                                                                                                                                        | Pdgfra                                                                               | 2.6  | 1.20E-05 | 0.000713201 |
| 1371883_at   | monocyte to macrophage differentiation-associated                                                                                                                                                                                                                                                                                                                                                                                 | Mmd                                                                                  | 2.5  | 1.20E-05 | 0.000712515 |
| 1388674_at   | cyclin-dependent kinase inhibitor 1A                                                                                                                                                                                                                                                                                                                                                                                              | Cdkn1a                                                                               | 3.6  | 1.21E-05 | 0.000715998 |
| 1370234_at   | fibronectin 1                                                                                                                                                                                                                                                                                                                                                                                                                     | <td>3.4</td> <td>1.23E-05</td> <td>0.000722225</td>                                  | 3.4  | 1.23E-05 | 0.000722225 |
| 1373164_at   | Transcribed locus                                                                                                                                                                                                                                                                                                                                                                                                                 | ---                                                                                  | 2.3  | 1.24E-05 | 0.000722225 |
| 1372610_at   | procollagen-proline, 2-oxoglutarate 4-dioxygenase (proline 4-hydroxylase), alpha II polypeptide (predicted)                                                                                                                                                                                                                                                                                                                       | P4ha2_predicted                                                                      | 1.8  | 1.28E-05 | 0.000742663 |
| 1377146_at   | vasoactive intestinal polypeptide                                                                                                                                                                                                                                                                                                                                                                                                 | Vip                                                                                  | 19.3 | 1.29E-05 | 0.000742663 |
| 1370613_s_at | UDP glycosyltransferase 1 family, polypeptide A1 /// UDP glycosyltransferase 1 family, polypeptide A6 /// UDP glycosyltransferase 1 family, polypeptide A7 /// UDP glycosyltransferase 1 family, polypeptide A8 /// UDP glycosyltransferase 1 family polypeptide A2 /// UDP glycosyltransferase 1 family polypeptide A3 /// UDP glycosyltransferase 1 family polypeptide A10 /// UDP glycosyltransferase 1 family, polypeptide A5 | Ugt1a1 /// Ugt1a10 /// Ugt1a2 /// Ugt1a3 /// Ugt1a5 /// Ugt1a6 /// Ugt1a7 /// Ugt1a8 | 2.6  | 1.30E-05 | 0.000745703 |
| 1367791_at   | receptor (calcitonin) activity modifying protein 1                                                                                                                                                                                                                                                                                                                                                                                | Ramp1                                                                                | 3.2  | 1.31E-05 | 0.000745703 |
| 1388296_at   | ribosomal protein S18                                                                                                                                                                                                                                                                                                                                                                                                             | Rps18                                                                                | 1.9  | 1.33E-05 | 0.000756362 |
| 1385440_at   | hematopoietic cell signal transducer                                                                                                                                                                                                                                                                                                                                                                                              | Hcst                                                                                 | 2.9  | 1.35E-05 | 0.000761055 |
| 1374113_at   | bromodomain adjacent to zinc finger domain, 1A (predicted)                                                                                                                                                                                                                                                                                                                                                                        | Baz1a_predicted                                                                      | 3.9  | 1.39E-05 | 0.000775092 |
| 1367712_at   | tissue inhibitor of metalloproteinase 1                                                                                                                                                                                                                                                                                                                                                                                           | Timp1                                                                                | 3.2  | 1.41E-05 | 0.000776806 |
| 1383222_at   | FERM-domain-containing protein 163SCII                                                                                                                                                                                                                                                                                                                                                                                            | LOC257646                                                                            | 2.0  | 1.41E-05 | 0.000776806 |
| 1367874_at   | ras homolog gene family, member Q                                                                                                                                                                                                                                                                                                                                                                                                 | Rhoq                                                                                 | 2.6  | 1.48E-05 | 0.000802262 |
| 1373829_at   | fibroblast growth factor receptor 2                                                                                                                                                                                                                                                                                                                                                                                               | Fgfr2                                                                                | 2.9  | 1.51E-05 | 0.000810492 |
| 1398882_at   | ribosomal protein S5                                                                                                                                                                                                                                                                                                                                                                                                              | Rps5                                                                                 | 1.7  | 1.54E-05 | 0.000820925 |
| 1385832_s_at | similar to RIKEN cDNA 1200013B08 (predicted)                                                                                                                                                                                                                                                                                                                                                                                      | RGD1560293_predicted                                                                 | 2.5  | 1.58E-05 | 0.000837553 |
| 1372642_at   | Transcribed locus                                                                                                                                                                                                                                                                                                                                                                                                                 | ---                                                                                  | 1.7  | 1.62E-05 | 0.000853389 |
| 1383486_at   | Transcribed locus                                                                                                                                                                                                                                                                                                                                                                                                                 | ---                                                                                  | 3.1  | 1.62E-05 | 0.000853389 |
| 1380318_at   | Transcribed locus, strongly similar to XP_579933.1 hypothetical protein XP_579933 [Rattus norvegicus]                                                                                                                                                                                                                                                                                                                             | ---                                                                                  | 2.6  | 1.64E-05 | 0.000857179 |
| 1371015_at   | myxovirus (influenza virus) resistance 1                                                                                                                                                                                                                                                                                                                                                                                          | Mx1                                                                                  | 8.4  | 1.67E-05 | 0.000867383 |
| 1388884_at   | similar to RIKEN cDNA 1810022C23                                                                                                                                                                                                                                                                                                                                                                                                  | RGD1310224                                                                           | 1.9  | 1.68E-05 | 0.000867383 |
| 1390866_at   | Transcribed locus                                                                                                                                                                                                                                                                                                                                                                                                                 | ---                                                                                  | 3.7  | 1.68E-05 | 0.000867383 |
| 1393329_at   | Inducible T-cell co-stimulator                                                                                                                                                                                                                                                                                                                                                                                                    | Icos                                                                                 | 1.7  | 1.71E-05 | 0.000873114 |
| 1367597_at   | ribosomal protein S8                                                                                                                                                                                                                                                                                                                                                                                                              | Rps8                                                                                 | 1.8  | 1.72E-05 | 0.000873114 |
| 1373485_at   | Similar to ring finger protein 122 homolog (predicted)                                                                                                                                                                                                                                                                                                                                                                            | RGD1561238_predicted                                                                 | 2.1  | 1.72E-05 | 0.000873114 |

|              |                                                                                                |                      |     |          |             |
|--------------|------------------------------------------------------------------------------------------------|----------------------|-----|----------|-------------|
| 1378032_at   | nuclear factor of kappa light polypeptide gene enhancer in B-cells inhibitor, zeta (predicted) | Nfkbiz_predicted     | 2.2 | 1.74E-05 | 0.000878626 |
| 1384933_at   | Transcribed locus                                                                              | ---                  | 2.2 | 1.79E-05 | 0.00089819  |
| 1377702_at   | similar to purinergic receptor P2Y, G-protein coupled, 5                                       | LOC684663            | 2.1 | 1.82E-05 | 0.000905998 |
| 1369202_at   | myxovirus (influenza virus) resistance 2                                                       | Mx2                  | 7.5 | 1.83E-05 | 0.000907641 |
| 1389047_at   | Similar to Bcl2-associated athanogene 2                                                        | LOC690038            | 1.9 | 1.83E-05 | 0.000907641 |
| 1371344_at   | ribosomal protein L27a (predicted)                                                             | Rpl27a_predicted     | 1.9 | 1.84E-05 | 0.000907641 |
| 1383401_at   | similar to Testis derived transcript                                                           | LOC500040            | 2.0 | 1.87E-05 | 0.000918829 |
| 1394940_at   | similar to hypothetical protein FLJ20037 (predicted)                                           | RGD1311381_predicted | 5.3 | 1.97E-05 | 0.000951114 |
| 1376750_at   | Transcribed locus                                                                              | ---                  | 6.9 | 2.00E-05 | 0.000961769 |
| 1398347_at   | Axl receptor tyrosine kinase /// similar to AXL receptor tyrosine kinase                       | Axl /// LOC687188    | 2.2 | 2.02E-05 | 0.000968411 |
| 1389351_at   | leucine rich repeat (in FLII) interacting protein 1                                            | Lrrfip1              | 2.5 | 2.03E-05 | 0.000968411 |
| 1368482_at   | B-cell leukemia/lymphoma 2 related protein A1                                                  | Bcl2a1               | 4.2 | 2.05E-05 | 0.000972323 |
| 1376805_at   | Transcribed locus                                                                              | ---                  | 2.2 | 2.06E-05 | 0.000972323 |
| 1387074_at   | regulator of G-protein signaling 2                                                             | Rgs2                 | 1.8 | 2.12E-05 | 0.000988764 |
| 1396144_at   | similar to Traf2 and NCK interacting kinase, splice variant 4 (predicted)                      | RGD1561817_predicted | 3.3 | 2.15E-05 | 0.000997067 |
| 1376579_at   | leucine aminopeptidase 3                                                                       | Lap3                 | 1.6 | 2.17E-05 | 0.001002135 |
| 1390798_at   | protein tyrosine phosphatase, receptor type, C                                                 | Ptprc                | 4.3 | 2.17E-05 | 0.001002135 |
| 1390738_at   | bone marrow stromal cell antigen 2                                                             | Bst2                 | 3.6 | 2.19E-05 | 0.00101105  |
| 1383833_at   | hypothetical protein LOC500991                                                                 | LOC500991            | 2.0 | 2.21E-05 | 0.001015979 |
| 1389966_at   | procollagen, type VI, alpha 3 (predicted)                                                      | Col6a3_predicted     | 2.8 | 2.22E-05 | 0.001017827 |
| 1384548_at   | ribosomal protein L32                                                                          | Rpl32                | 1.9 | 2.23E-05 | 0.001019999 |
| 1367610_at   | ribosomal protein L19                                                                          | Rpl19                | 1.7 | 2.24E-05 | 0.00102046  |
| 1381985_at   | ---                                                                                            | ---                  | 1.9 | 2.25E-05 | 0.001023349 |
| 1371302_at   | similar to Small EDRK-rich factor 2 (4F5rel)                                                   | LOC502663            | 1.7 | 2.27E-05 | 0.001028334 |
| 1377766_at   | similar to erythroid differentiation-related factor 1 (predicted)                              | RGD1306820_predicted | 1.9 | 2.30E-05 | 0.001040935 |
| 1390096_at   | SH3-domain GRB2-like B1 (endophilin)                                                           | Sh3glb1              | 1.7 | 2.33E-05 | 0.001044751 |
| 1377713_at   | checkpoint suppressor 1 (predicted)                                                            | Ches1_predicted      | 1.7 | 2.35E-05 | 0.001044751 |
| 1378311_at   | ---                                                                                            | ---                  | 3.7 | 2.36E-05 | 0.001044751 |
| 1390687_at   | pleckstrin                                                                                     | Plek                 | 4.8 | 2.36E-05 | 0.001044751 |
| 1374734_at   | hypothetical protein LOC680254 ///                                                             | LOC680254 ///        | 2.0 | 2.37E-05 | 0.001044751 |
| 1377831_at   | monoamine oxidase A                                                                            | Maoa                 | 2.0 | 2.37E-05 | 0.001044751 |
| 1367717_at   | ribosomal protein S27                                                                          | Rps27                | 1.7 | 2.39E-05 | 0.001049726 |
| 1389496_at   | A kinase (PRKA) anchor protein 7                                                               | Akap7                | 2.5 | 2.44E-05 | 0.001060703 |
| 1392148_at   | Similar to H43E16.1                                                                            | LOC689994            | 1.7 | 2.46E-05 | 0.001064804 |
| 1370408_at   | putative small membrane protein NID67                                                          | Nid67                | 1.7 | 2.54E-05 | 0.001089032 |
| 1378009_at   | Transcribed locus                                                                              | ---                  | 2.3 | 2.57E-05 | 0.001093364 |
| 1389228_at   | similar to RIKEN cDNA 2010309E21 (predicted)                                                   | RGD1304825_predicted | 1.7 | 2.57E-05 | 0.001093364 |
| 1392578_at   | Matrix Gla protein                                                                             | Mgp                  | 3.6 | 2.58E-05 | 0.001094871 |
| 1380811_at   | Transcribed locus                                                                              | ---                  | 1.6 | 2.66E-05 | 0.001119838 |
| 1372256_at   | similar to Cysteine-rich protein 1 (Cysteine-rich intestinal protein) (CRIP)                   | LOC686293 ///        | 2.0 | 2.67E-05 | 0.001119838 |
| 1367850_at   | Fc receptor, IgG, low affinity III                                                             | Fcgr3                | 5.8 | 2.73E-05 | 0.001133504 |
| 1373052_at   | phosducin-like 3                                                                               | Pdcl3                | 1.9 | 2.75E-05 | 0.001133504 |
| 1382108_at   | Transcribed locus                                                                              | ---                  | 3.9 | 2.76E-05 | 0.001133504 |
| 1376151_a_at | ---                                                                                            | ---                  | 4.0 | 2.86E-05 | 0.001171025 |
| 1383946_at   | claudin 1                                                                                      | Cldn1                | 5.6 | 2.86E-05 | 0.001171025 |
| 1371057_at   | gamma-aminobutyric acid (GABA-A) receptor, subunit alpha 5                                     | Gabra5               | 2.8 | 2.88E-05 | 0.001171025 |
| 1389368_at   | Cnksr family member 3                                                                          | Cnksr3               | 2.0 | 2.92E-05 | 0.001176405 |
| 1368464_at   | macrophage galactose N-acetyl-galactosamine specific lectin 1                                  | Mgl1                 | 4.0 | 2.95E-05 | 0.001181019 |
| 1398775_at   | ribosomal protein S15a                                                                         | Rps15a               | 1.7 | 2.97E-05 | 0.001184622 |
| 1373575_at   | similar to NADH dehydrogenase (ubiquinone) Fe-S protein 2                                      | LOC498279            | 5.3 | 3.04E-05 | 0.001199774 |
| 1387891_at   | peroxiredoxin 4                                                                                | Prdx4                | 1.7 | 3.04E-05 | 0.001199774 |

|              |                                                                                                                                                                                                                                                                          |                                                                                                                                                                                                                                    |     |          |             |
|--------------|--------------------------------------------------------------------------------------------------------------------------------------------------------------------------------------------------------------------------------------------------------------------------|------------------------------------------------------------------------------------------------------------------------------------------------------------------------------------------------------------------------------------|-----|----------|-------------|
| 1392557_at   | Bicaudal C homolog 1 (Drosophila) (predicted)                                                                                                                                                                                                                            | Bicc1_predicted                                                                                                                                                                                                                    | 2.4 | 3.07E-05 | 0.001207012 |
| 1388138_at   | thrombospondin 4                                                                                                                                                                                                                                                         | Thbs4                                                                                                                                                                                                                              | 3.8 | 3.08E-05 | 0.001210702 |
| 1372064_at   | similar to chemokine (C-X-C motif) ligand 16                                                                                                                                                                                                                             | Cxcl16                                                                                                                                                                                                                             | 2.6 | 3.17E-05 | 0.001234846 |
| 1378413_at   | Transcribed locus                                                                                                                                                                                                                                                        | ---                                                                                                                                                                                                                                | 3.2 | 3.18E-05 | 0.001234846 |
| 1397808_at   | Cathepsin C                                                                                                                                                                                                                                                              | Ctsc                                                                                                                                                                                                                               | 3.0 | 3.23E-05 | 0.00124752  |
| 1387101_at   | acyl-CoA synthetase long-chain family member 4                                                                                                                                                                                                                           | Acsl4                                                                                                                                                                                                                              | 2.1 | 3.25E-05 | 0.00124936  |
| 1367938_at   | UDP-glucose dehydrogenase                                                                                                                                                                                                                                                | Ugdh                                                                                                                                                                                                                               | 1.9 | 3.26E-05 | 0.00124936  |
| 1372685_at   | cyclin-dependent kinase inhibitor 3 (predicted)                                                                                                                                                                                                                          | Cdkn3_predicted                                                                                                                                                                                                                    | 3.6 | 3.26E-05 | 0.00124936  |
| 1373657_at   | solute carrier family 31, member 2                                                                                                                                                                                                                                       | Slc31a2                                                                                                                                                                                                                            | 2.0 | 3.29E-05 | 0.001254225 |
| 1381341_at   | ---                                                                                                                                                                                                                                                                      | ---                                                                                                                                                                                                                                | 3.7 | 3.31E-05 | 0.001259286 |
| 1372930_at   | SP110 nuclear body protein                                                                                                                                                                                                                                               | Sp110                                                                                                                                                                                                                              | 3.7 | 3.38E-05 | 0.001284507 |
| 1398481_at   | Transcribed locus                                                                                                                                                                                                                                                        | ---                                                                                                                                                                                                                                | 2.0 | 3.39E-05 | 0.001284592 |
| 1387032_at   | cholecystokinin                                                                                                                                                                                                                                                          | Cck                                                                                                                                                                                                                                | 1.7 | 3.42E-05 | 0.001293545 |
| 1377779_at   | phosducin-like 3                                                                                                                                                                                                                                                         | Pdcl3                                                                                                                                                                                                                              | 1.9 | 3.44E-05 | 0.001297397 |
| 1377334_at   | RT1 class II, locus Ba                                                                                                                                                                                                                                                   | RT1-Ba                                                                                                                                                                                                                             | 3.9 | 3.46E-05 | 0.001302935 |
| 1367912_at   | latent transforming growth factor beta binding protein 1                                                                                                                                                                                                                 | Ltbp1                                                                                                                                                                                                                              | 3.0 | 3.48E-05 | 0.001302935 |
| 1376645_at   | Similar to RIKEN cDNA 633040615 (predicted)                                                                                                                                                                                                                              | RGD1307396_predicted                                                                                                                                                                                                               | 2.9 | 3.50E-05 | 0.001303798 |
| 1376708_at   | Hypothetical protein LOC680422                                                                                                                                                                                                                                           | LOC680422                                                                                                                                                                                                                          | 2.7 | 3.50E-05 | 0.001303798 |
| 1367946_at   | PDZ and LIM domain 1 (elfin)                                                                                                                                                                                                                                             | Pdlim1                                                                                                                                                                                                                             | 2.1 | 3.56E-05 | 0.001321305 |
| 1368742_at   | complement component 5, receptor 1                                                                                                                                                                                                                                       | C5r1                                                                                                                                                                                                                               | 2.0 | 3.58E-05 | 0.001325845 |
| 1388694_at   | ---                                                                                                                                                                                                                                                                      | ---                                                                                                                                                                                                                                | 4.0 | 3.59E-05 | 0.001325845 |
| 1380110_at   | ---                                                                                                                                                                                                                                                                      | ---                                                                                                                                                                                                                                | 2.0 | 3.64E-05 | 0.001336019 |
| 1387893_at   | complement component 1, s subcomponent /// similar to complement component 1, s subcomponent (predicted)                                                                                                                                                                 | C1s ///<br>RGD1561715_predicted                                                                                                                                                                                                    | 3.8 | 3.64E-05 | 0.001336019 |
| 1392515_at   | Ly49 inhibitory receptor 9 /// immunoreceptor Ly49si1 /// immunoreceptor Ly49si2 /// immunoreceptor Ly49si3 /// Ly49 inhibitory receptor 5 /// similar to immunoreceptor Ly49si3 (predicted) /// similar to immunoreceptor Ly49si1 /// similar to immunoreceptor Ly49si3 | LOC502907 ///<br>LOC684013 ///<br>LOC684059 ///<br>LOC684068 ///<br>LOC690045 ///<br>LOC690097 /// Ly49i5<br>/// Ly49i9 /// Ly49si1 ///<br>Ly49si2 /// Ly49si3 ///<br>RGD1561306_predicted<br>ed ///<br>RGD1563110_predicted<br>ed | 6.8 | 3.65E-05 | 0.001336019 |
| 1368834_at   | calcium/calmodulin-dependent protein kinase II, delta                                                                                                                                                                                                                    | Camk2d                                                                                                                                                                                                                             | 1.8 | 3.68E-05 | 0.001345088 |
| 1395184_at   | ---                                                                                                                                                                                                                                                                      | ---                                                                                                                                                                                                                                | 3.7 | 3.70E-05 | 0.001347652 |
| 1383659_a_at | ---                                                                                                                                                                                                                                                                      | ---                                                                                                                                                                                                                                | 2.5 | 3.77E-05 | 0.001364509 |
| 1392092_at   | RAB33A, member of RAS oncogene family (predicted)                                                                                                                                                                                                                        | Rab33a_predicted                                                                                                                                                                                                                   | 2.1 | 3.78E-05 | 0.001365013 |
| 1368488_at   | nuclear factor, interleukin 3 regulated                                                                                                                                                                                                                                  | Nfil3                                                                                                                                                                                                                              | 2.0 | 3.79E-05 | 0.001366103 |
| 1369973_at   | xanthine dehydrogenase                                                                                                                                                                                                                                                   | Xdh                                                                                                                                                                                                                                | 2.4 | 3.80E-05 | 0.00136867  |
| 1385029_at   | Transcribed locus                                                                                                                                                                                                                                                        | ---                                                                                                                                                                                                                                | 2.5 | 3.86E-05 | 0.001380567 |
| 1371951_at   | ---                                                                                                                                                                                                                                                                      | ---                                                                                                                                                                                                                                | 2.5 | 3.89E-05 | 0.001389675 |
| 1367930_at   | growth associated protein 43                                                                                                                                                                                                                                             | Gap43                                                                                                                                                                                                                              | 1.9 | 3.94E-05 | 0.001398645 |
| 1374422_at   | similar to ErbB2 interacting protein isoform 2 (predicted)                                                                                                                                                                                                               | RGD1562952_predicted                                                                                                                                                                                                               | 1.9 | 4.02E-05 | 0.001421549 |
| 1388372_at   | ribosomal protein L35                                                                                                                                                                                                                                                    | Rpl35                                                                                                                                                                                                                              | 1.8 | 4.03E-05 | 0.001422271 |
| 1367954_at   | glial cell line derived neurotrophic factor family receptor alpha 1                                                                                                                                                                                                      | Gfra1                                                                                                                                                                                                                              | 2.5 | 4.06E-05 | 0.001431682 |
| 1383269_at   | ring finger protein 2                                                                                                                                                                                                                                                    | Rnf2                                                                                                                                                                                                                               | 1.8 | 4.12E-05 | 0.001447847 |
| 1379477_at   | Similar to Programmed cell death 6 interacting protein (ALG-2 interacting protein X) (predicted)                                                                                                                                                                         | RGD1561176_predicted                                                                                                                                                                                                               | 2.6 | 4.20E-05 | 0.001474299 |
| 1374615_at   | ---                                                                                                                                                                                                                                                                      | ---                                                                                                                                                                                                                                | 2.0 | 4.29E-05 | 0.001502529 |
| 1397540_at   | Transcribed locus                                                                                                                                                                                                                                                        | ---                                                                                                                                                                                                                                | 3.1 | 4.36E-05 | 0.001516999 |
| 1387134_at   | schlafen 3                                                                                                                                                                                                                                                               | Slf3                                                                                                                                                                                                                               | 9.3 | 4.37E-05 | 0.001516999 |
| 1371037_at   | protein S (alpha)                                                                                                                                                                                                                                                        | Pros1                                                                                                                                                                                                                              | 1.9 | 4.42E-05 | 0.001526634 |

|              |                                                                                                                                                                          |                                                                                                           |     |          |             |
|--------------|--------------------------------------------------------------------------------------------------------------------------------------------------------------------------|-----------------------------------------------------------------------------------------------------------|-----|----------|-------------|
| 1379043_at   | Transcribed locus                                                                                                                                                        | ---                                                                                                       | 1.7 | 4.48E-05 | 0.001543115 |
| 1389006_at   | Transcribed locus                                                                                                                                                        | ---                                                                                                       | 8.5 | 4.50E-05 | 0.001543776 |
| 1389443_at   | ---                                                                                                                                                                      | ---                                                                                                       | 2.1 | 4.52E-05 | 0.001549915 |
| 1388303_at   | ribosomal protein L26                                                                                                                                                    | Rpl26                                                                                                     | 2.2 | 4.57E-05 | 0.001557006 |
| 1391660_at   | Transcribed locus                                                                                                                                                        | ---                                                                                                       | 2.8 | 4.71E-05 | 0.0015857   |
| 1374941_at   | Transcribed locus                                                                                                                                                        | ---                                                                                                       | 2.5 | 4.75E-05 | 0.001594456 |
| 1371002_at   | programmed cell death 2                                                                                                                                                  | Pdcd2                                                                                                     | 2.3 | 4.77E-05 | 0.001598008 |
| 1393213_at   | cyclin L2                                                                                                                                                                | Ccnl2                                                                                                     | 1.9 | 4.78E-05 | 0.001598008 |
| 1382739_at   | G protein-coupled receptor 19                                                                                                                                            | Gpr19                                                                                                     | 1.8 | 4.82E-05 | 0.001602731 |
| 1367614_at   | annexin A1                                                                                                                                                               | Anxa1                                                                                                     | 2.0 | 5.07E-05 | 0.001662315 |
| 1373504_at   | GLI pathogenesis-related 1 (glioma)                                                                                                                                      | Glipr1                                                                                                    | 2.6 | 5.07E-05 | 0.001662315 |
| 1397004_at   | Nuclear receptor subfamily 3, group C, member 1                                                                                                                          | Nr3c1                                                                                                     | 2.0 | 5.18E-05 | 0.001689257 |
| 1393111_at   | ---                                                                                                                                                                      | ---                                                                                                       | 3.1 | 5.29E-05 | 0.001715654 |
| 1376973_at   | syndecan binding protein (syntenin) 2                                                                                                                                    | Sdcbp2                                                                                                    | 2.3 | 5.33E-05 | 0.001724485 |
| 1376996_at   | Transcribed locus                                                                                                                                                        | ---                                                                                                       | 1.7 | 5.34E-05 | 0.001724485 |
| 1370418_s_at | brain and kidney protein                                                                                                                                                 | Bk                                                                                                        | 2.3 | 5.35E-05 | 0.001724485 |
| 1369268_at   | activating transcription factor 3                                                                                                                                        | Atf3                                                                                                      | 8.4 | 5.36E-05 | 0.001724485 |
| 1368224_at   | serine (or cysteine) peptidase inhibitor, clade A, member 3N                                                                                                             | Serpina3n                                                                                                 | 6.8 | 5.45E-05 | 0.001745623 |
| 1368106_at   | polo-like kinase 2 (Drosophila)                                                                                                                                          | Plk2                                                                                                      | 1.8 | 5.48E-05 | 0.001745623 |
| 1371308_at   | ribosomal protein S4, X-linked                                                                                                                                           | Rps4x                                                                                                     | 1.6 | 5.48E-05 | 0.001745623 |
| 1388879_at   | similar to ABI gene family, member 3 (NESH) binding protein (predicted)                                                                                                  | RGD1562717_predicted                                                                                      | 2.6 | 5.48E-05 | 0.001745623 |
| 1391719_at   | ---                                                                                                                                                                      | ---                                                                                                       | 1.8 | 5.48E-05 | 0.001745623 |
| 1383708_at   | similar to integrin, beta-like 1                                                                                                                                         | LOC498564                                                                                                 | 3.9 | 5.51E-05 | 0.001745623 |
| 1373838_at   | fucosyltransferase 4                                                                                                                                                     | Fut4                                                                                                      | 2.4 | 5.53E-05 | 0.001745623 |
| 1382442_at   | similar to Septin-6                                                                                                                                                      | LOC682750                                                                                                 | 1.9 | 5.56E-05 | 0.001748159 |
| 1377674_at   | similar to PHF21A protein (predicted)                                                                                                                                    | RGD1560612_predicted                                                                                      | 1.7 | 5.59E-05 | 0.001753636 |
| 1373424_at   | DiGeorge syndrome critical region gene 6 (predicted)                                                                                                                     | Dgcr6_predicted                                                                                           | 1.7 | 5.67E-05 | 0.001767498 |
| 1368211_at   | ribosomal protein S14                                                                                                                                                    | Rps14                                                                                                     | 1.8 | 5.72E-05 | 0.001769703 |
| 1388700_at   | CDNA clone IMAGE:7317367                                                                                                                                                 | ---                                                                                                       | 1.8 | 5.73E-05 | 0.001769703 |
| 1374643_at   | similar to FAT tumor suppressor homolog 4 (predicted)                                                                                                                    | RGD1564291_predicted                                                                                      | 1.9 | 5.85E-05 | 0.001795884 |
| 1376763_at   | Transcribed locus                                                                                                                                                        | ---                                                                                                       | 2.6 | 5.85E-05 | 0.001795884 |
| 1391812_at   | Similar to RIKEN cDNA E330026B02 (predicted)                                                                                                                             | RGD1309172_predicted                                                                                      | 4.1 | 5.92E-05 | 0.001809363 |
| 1388986_at   | Transcribed locus                                                                                                                                                        | ---                                                                                                       | 1.7 | 5.98E-05 | 0.00181593  |
| 1393639_at   | myosin X (predicted)                                                                                                                                                     | Myo10_predicted                                                                                           | 2.1 | 6.12E-05 | 0.001854453 |
| 1392655_at   | Transcribed locus                                                                                                                                                        | ---                                                                                                       | 3.3 | 6.18E-05 | 0.001860461 |
| 1373499_at   | growth arrest specific 5                                                                                                                                                 | Gas5                                                                                                      | 2.6 | 6.21E-05 | 0.001863871 |
| 1367516_at   | distrobrevin binding protein 1                                                                                                                                           | Dtnbp1                                                                                                    | 2.4 | 6.36E-05 | 0.001899804 |
| 1383986_at   | tropomyosin 3, gamma                                                                                                                                                     | Tpm3                                                                                                      | 1.6 | 6.45E-05 | 0.001921205 |
| 1373106_at   | zinc finger protein 36, C3H type-like 2                                                                                                                                  | Zfp36l2                                                                                                   | 2.5 | 6.46E-05 | 0.001921205 |
| 1379835_at   | Transcribed locus                                                                                                                                                        | ---                                                                                                       | 1.8 | 6.70E-05 | 0.001967953 |
| 1376664_at   | liver regeneration-related protein                                                                                                                                       | LOC246187                                                                                                 | 3.3 | 6.75E-05 | 0.001978936 |
| 1376649_at   | Transcribed locus                                                                                                                                                        | ---                                                                                                       | 2.2 | 6.81E-05 | 0.001988424 |
| 1373823_at   | similar to Cyclin-dependent kinases regulatory subunit 2 (CKS-2) (predicted)                                                                                             | RGD1562047_predicted                                                                                      | 3.3 | 6.82E-05 | 0.001988424 |
| 1382492_a_at | hydroxysteroid (17-beta) dehydrogenase 8                                                                                                                                 | Hsd17b8                                                                                                   | 2.7 | 6.82E-05 | 0.001988424 |
| 1367940_at   | chemokine orphan receptor 1                                                                                                                                              | Cmkor1                                                                                                    | 2.6 | 6.88E-05 | 0.002000394 |
| 1375181_at   | similar to 60S ribosomal protein L12 (predicted) /// similar to 60S ribosomal protein L12 /// hypothetical LOC500136 /// similar to similar to 60S ribosomal protein L12 | LOC499782 ///<br>LOC500136 ///<br>LOC679192 ///<br>LOC685320 ///<br>LOC688511 ///<br>RGD1564883_predicted | 1.5 | 6.94E-05 | 0.002010193 |
| 1367973_at   | chemokine (C-C motif) ligand 2                                                                                                                                           | Ccl2                                                                                                      | 2.4 | 6.95E-05 | 0.002010193 |
| 1371940_at   | similar to microfilament and actin filament cross-linker protein isoform b                                                                                               | LOC362587                                                                                                 | 1.6 | 6.97E-05 | 0.002010193 |
| 1370194_at   | synaptosomal-associated protein 23                                                                                                                                       | Snap23                                                                                                    | 1.8 | 6.99E-05 | 0.002010193 |
| 1368361_a_at | protein tyrosine phosphatase, non-receptor type 2                                                                                                                        | Ptpn2                                                                                                     | 2.9 | 7.00E-05 | 0.002010193 |
| 1383910_at   | Transcribed locus                                                                                                                                                        | ---                                                                                                       | 2.2 | 7.01E-05 | 0.002010193 |
| 1371307_at   | ribosomal protein, large, P1                                                                                                                                             | Rplp1                                                                                                     | 1.6 | 7.06E-05 | 0.002016211 |

|              |                                                                                                           |                               |     |             |             |
|--------------|-----------------------------------------------------------------------------------------------------------|-------------------------------|-----|-------------|-------------|
| 1377950_at   | similar to interferon-inducible GTPase                                                                    | RGD1309362                    | 9.3 | 7.10E-05    | 0.002025095 |
| 1388754_at   | ---                                                                                                       | ---                           | 2.6 | 7.20E-05    | 0.002046425 |
| 1380219_at   | ---                                                                                                       | ---                           | 1.6 | 7.30E-05    | 0.002069202 |
| 1370442_at   | thymosin beta-like protein 1                                                                              | Tmsbl1                        | 1.8 | 7.33E-05    | 0.002071863 |
| 1380297_at   | ---                                                                                                       | ---                           | 1.7 | 7.42E-05    | 0.002090952 |
| 1390024_at   | ---                                                                                                       | ---                           | 2.6 | 7.56E-05    | 0.002123916 |
| 1378753_at   | occludin                                                                                                  | Ocln                          | 3.4 | 7.71E-05    | 0.002157244 |
| 1388449_at   | eukaryotic translation elongation factor 1 beta 2 (predicted)                                             | Eef1b2_predicted              | 1.8 | 7.90E-05    | 0.00220097  |
| 1393499_at   | phosphatidylinositol 3-kinase, catalytic, alpha polypeptide                                               | Pik3ca                        | 2.5 | 7.97E-05    | 0.002213494 |
| 1399062_at   | CDNA clone IMAGE:7317308                                                                                  | ---                           | 2.0 | 8.01E-05    | 0.002215606 |
| 1393144_at   | N-myc (and STAT) interactor                                                                               | Nmi                           | 2.3 | 8.08E-05    | 0.002229334 |
| 1377198_at   | Transcribed locus                                                                                         | ---                           | 2.2 | 8.19E-05    | 0.002251458 |
| 1380665_at   | CGI-58-like protein                                                                                       | LOC316122                     | 1.6 | 8.32E-05    | 0.002267697 |
| 1367998_at   | secretory leukocyte peptidase inhibitor /// similar to secretory leukocyte protease inhibitor (predicted) | RGD1563818_predicted /// Slpi | 8.3 | 8.34E-05    | 0.002267697 |
| 1374029_at   | ---                                                                                                       | ---                           | 1.9 | 8.34E-05    | 0.002267697 |
| 1383294_at   | prodynorphin                                                                                              | Pdyn                          | 2.7 | 8.52E-05    | 0.002298812 |
| 1383658_at   | lysosomal-associated protein transmembrane 5                                                              | Laptm5                        | 2.2 | 8.52E-05    | 0.002298812 |
| 1373421_at   | TG interacting factor                                                                                     | Tgif                          | 2.1 | 8.56E-05    | 0.002298812 |
| 1382452_at   | serum deprivation response protein                                                                        | Sdpr                          | 2.2 | 8.57E-05    | 0.002298812 |
| 1377064_at   | dual specificity phosphatase 6                                                                            | Dusp6                         | 2.4 | 8.62E-05    | 0.002306719 |
| 1367679_at   | CD74 antigen (invariant polypeptide of major histocompatibility complex, class II antigen-associated)     | Cd74                          | 6.0 | 8.64E-05    | 0.002306719 |
| 1391341_at   | ADP-ribosylation factor-like 12 (predicted)                                                               | Arl12_predicted               | 1.8 | 8.64E-05    | 0.002306719 |
| 1374544_at   | hypothetical protein LOC679150 /// hypothetical protein LOC690899                                         | LOC679150 /// MGC112715       | 1.8 | 8.69E-05    | 0.002315223 |
| 1372204_at   | ---                                                                                                       | ---                           | 1.7 | 8.78E-05    | 0.002332378 |
| 1389295_at   | olfactomedin-like 2B (predicted)                                                                          | Olfml2b_predicted             | 1.9 | 8.84E-05    | 0.002342208 |
| 1398324_at   | similar to 60S ribosomal protein L18a                                                                     | MGC72957                      | 1.6 | 8.84E-05    | 0.002342208 |
| 1376700_at   | Clone ZX36 unknown mRNA                                                                                   | ---                           | 2.3 | 8.90E-05    | 0.002348947 |
| 1368754_at   | pyrimidinergic receptor P2Y, G-protein coupled, 6                                                         | P2ry6                         | 1.9 | 9.02E-05    | 0.002362838 |
| 1387887_at   | ribosomal protein L14                                                                                     | Rpl14                         | 1.6 | 9.04E-05    | 0.002362838 |
| 1375011_at   | Transcribed locus                                                                                         | ---                           | 1.8 | 9.15E-05    | 0.002377389 |
| 1373368_at   | similar to procollagen C-endopeptidase enhancer 2                                                         | LOC684050                     | 2.0 | 9.16E-05    | 0.002377389 |
| 1379631_at   | colony stimulating factor 1 (macrophage)                                                                  | Csf1                          | 2.3 | 9.16E-05    | 0.002377389 |
| 1381145_at   | Transcribed locus                                                                                         | ---                           | 3.9 | 9.20E-05    | 0.002378591 |
| 1387186_at   | RAB9, member RAS oncogene family                                                                          | Rab9                          | 1.9 | 9.29E-05    | 0.00239305  |
| 1372112_at   | similar to 9230105E10Rik protein                                                                          | RGD1304579                    | 2.3 | 9.30E-05    | 0.00239305  |
| 1373897_at   | ---                                                                                                       | ---                           | 3.7 | 9.32E-05    | 0.002394446 |
| 1368202_a_at | disabled homolog 2 (Drosophila)                                                                           | Dab2                          | 2.7 | 9.35E-05    | 0.002398608 |
| 1387221_at   | GTP cyclohydrolase 1                                                                                      | Gch                           | 5.4 | 9.54E-05    | 0.002436801 |
| 1390909_at   | Transcribed locus                                                                                         | ---                           | 2.5 | 9.57E-05    | 0.002439176 |
| 1392274_at   | Platelet-derived growth factor, C polypeptide                                                             | Pdgfc                         | 2.3 | 9.65E-05    | 0.002451996 |
| 1397173_at   | similar to Serine/threonine-protein kinase WNK3 (Protein kinase, lysine-deficient 3) (predicted)          | RGD1563131_predicted          | 1.9 | 9.66E-05    | 0.002451996 |
| 1398315_at   | ribosomal protein L15                                                                                     | Rpl15                         | 1.6 | 9.80E-05    | 0.002477476 |
| 1388673_at   | lymphocyte specific 1                                                                                     | Lsp1                          | 1.8 | 9.91E-05    | 0.002488416 |
| 1388662_at   | Transcribed locus                                                                                         | ---                           | 1.7 | 9.94E-05    | 0.002488416 |
| 1370678_s_at | monoamine oxidase A                                                                                       | Maoa                          | 2.1 | 0.000100263 | 0.002498677 |
| 1386879_at   | lectin, galactose binding, soluble 3                                                                      | Lgals3                        | 1.7 | 0.000100683 | 0.002505356 |
| 1382043_at   | unc-93 homolog B1 (C. elegans)                                                                            | Unc93b1                       | 1.8 | 0.000101854 | 0.002519242 |
| 1370281_at   | fatty acid binding protein 5, epidermal                                                                   | Fabp5                         | 1.6 | 0.00010355  | 0.002549682 |
| 1368728_at   | purinergic receptor P2Y, G-protein coupled 12                                                             | P2ry12                        | 1.8 | 0.000106623 | 0.002595861 |
| 1389408_at   | ribonucleotide reductase M2                                                                               | Rrm2                          | 4.4 | 0.000106688 | 0.002595861 |
| 1393492_at   | Transcribed locus                                                                                         | ---                           | 2.2 | 0.000107618 | 0.002613317 |
| 1367596_at   | ribosomal protein S26                                                                                     | Rps26                         | 1.7 | 0.000107723 | 0.002613317 |
| 1398854_at   | ribosomal protein L24                                                                                     | Rpl24                         | 1.9 | 0.000107896 | 0.002613647 |



|            |                                                                                                                                                |                                                                    |      |             |             |
|------------|------------------------------------------------------------------------------------------------------------------------------------------------|--------------------------------------------------------------------|------|-------------|-------------|
| 1378654_at | Transcribed locus                                                                                                                              | ---                                                                | 1.7  | 0.000108462 | 0.002623515 |
| 1389143_at | phosphatidylinositol 3-kinase, catalytic, alpha polypeptide                                                                                    | Pik3ca                                                             | 1.9  | 0.00010929  | 0.002633336 |
| 1370892_at | complement component 4a /// complement component 4, gene 2                                                                                     | C4-2 /// C4a                                                       | 4.3  | 0.000109509 | 0.002633336 |
| 1384093_at | similar to Complement C1q-like protein 3 precursor (Gliacolin)                                                                                 | LOC684921                                                          | 3.3  | 0.000110084 | 0.00263908  |
| 1374794_at | kinesin family member 15                                                                                                                       | Kif15                                                              | 3.3  | 0.00011055  | 0.00263908  |
| 1383146_at | similar to neurobeachin (predicted)                                                                                                            | RGD1562629_predicted                                               | 1.7  | 0.000110792 | 0.002641016 |
| 1369959_at | zinc finger protein 36, C3H type-like 1                                                                                                        | Zfp36l1                                                            | 2.4  | 0.000111825 | 0.002656412 |
| 1372564_at | v-ets erythroblastosis virus E26 oncogene homolog 2 (avian)                                                                                    | Ets2                                                               | 1.7  | 0.000112222 | 0.002656412 |
| 1388519_at | Sec61 beta subunit (predicted)                                                                                                                 | Sec61b_predicted                                                   | 1.7  | 0.000112345 | 0.002656412 |
| 1387169_at | transducin-like enhancer of split 3, E(spl) homolog (Drosophila)                                                                               | Tie3                                                               | 2.1  | 0.00011273  | 0.002656412 |
| 1382749_at | RNA binding motif protein 5                                                                                                                    | Rbm5                                                               | 1.7  | 0.000113838 | 0.00267869  |
| 1367645_at | ribosomal protein S17                                                                                                                          | Rps17                                                              | 1.6  | 0.000114446 | 0.002682757 |
| 1370882_at | major histocompatibility complex, class II, DM beta                                                                                            | Hla-dmb                                                            | 3.2  | 0.000115789 | 0.002709097 |
| 1384195_at | similar to transmembrane protein 45a                                                                                                           | LOC680866 ///<br>LOC682422                                         | 2.7  | 0.000116772 | 0.002718281 |
| 1393653_at | similar to putative protein product of HMFN2073 (predicted)                                                                                    | RGD1560766_predicted                                               | 1.9  | 0.000118195 | 0.002735019 |
| 1367916_at | phospholipase C, delta 1                                                                                                                       | Plcd1                                                              | 1.8  | 0.000118511 | 0.002737737 |
| 1384707_at | Transcribed locus                                                                                                                              | ---                                                                | 3.3  | 0.000119352 | 0.002745607 |
| 1379397_at | RAR-related orphan receptor alpha (predicted)                                                                                                  | Rora_predicted                                                     | 1.6  | 0.000123413 | 0.002823226 |
| 1396835_at | Transcribed locus                                                                                                                              | ---                                                                | 2.0  | 0.000124351 | 0.002829627 |
| 1373433_at | nucleosome binding protein 1 (predicted) /// similar to Nucleosome binding protein 1 (Nucleosome binding protein 45) (NBP-45) (GARP45 protein) | LOC680182 ///<br>LOC681284 ///<br>LOC682212 ///<br>Nsbp1_predicted | 2.4  | 0.000125096 | 0.002838054 |
| 1392238_at | Transcribed locus                                                                                                                              | ---                                                                | 2.2  | 0.000125167 | 0.002838054 |
| 1374650_at | neural precursor cell expressed, developmentally down-regulated gene 9                                                                         | Nedd9                                                              | 1.9  | 0.000125269 | 0.002838054 |
| 1390042_at | similar to 1110007F12Rik protein                                                                                                               | MGC109491                                                          | 3.1  | 0.000129218 | 0.002887736 |
| 1393460_at | leucine rich repeat containing 33                                                                                                              | Lrrc33                                                             | 2.0  | 0.000130594 | 0.002910576 |
| 1368073_at | interferon regulatory factor 1                                                                                                                 | Irf1                                                               | 2.2  | 0.000133201 | 0.002949341 |
| 1376575_at | Transcribed locus                                                                                                                              | ---                                                                | 2.0  | 0.00013323  | 0.002949341 |
| 1383238_at | queuine tRNA-ribosyltransferase 1                                                                                                              | Qtrt1                                                              | 1.8  | 0.000133823 | 0.002956634 |
| 1374065_at | Met proto-oncogene                                                                                                                             | Met                                                                | 2.5  | 0.000134497 | 0.002964903 |
| 1385572_at | Transcribed locus                                                                                                                              | ---                                                                | 2.2  | 0.000134654 | 0.002964903 |
| 1374691_at | sulfotransferase family 5A, member 1 (predicted)                                                                                               | Sult5a1_predicted                                                  | 2.1  | 0.000135358 | 0.002974878 |
| 1388900_at | RGD1566118 (predicted)                                                                                                                         | RGD1566118_predicted                                               | 1.9  | 0.000135468 | 0.002974878 |
| 1397692_at | cytotoxic granule-associated RNA binding protein 1                                                                                             | Tia1                                                               | 2.1  | 0.000136249 | 0.002984051 |
| 1387313_at | myocilin                                                                                                                                       | Myoc                                                               | 2.5  | 0.000136637 | 0.002988566 |
| 1386912_at | procollagen C-endopeptidase enhancer protein                                                                                                   | Pcolce                                                             | 1.8  | 0.000137678 | 0.003000657 |
| 1398809_at | nuclear distribution gene E homolog 1 (A nidulans)                                                                                             | Nde1                                                               | 1.5  | 0.000137737 | 0.003000657 |
| 1370075_at | dihydrofolate reductase                                                                                                                        | Dhfr                                                               | 2.1  | 0.000139177 | 0.003024029 |
| 1367671_at | proliferating cell nuclear antigen                                                                                                             | Pcna                                                               | 1.6  | 0.000140339 | 0.003041241 |
| 1372734_at | small cell adhesion glycoprotein                                                                                                               | Smagp                                                              | 3.7  | 0.000141507 | 0.00304339  |
| 1378440_at | Transcribed locus                                                                                                                              | ---                                                                | 2.2  | 0.000141625 | 0.00304339  |
| 1373992_at | similar to interferon-inducible GTPase /// similar to MGC108823 protein (predicted)                                                            | MGC108823 ///<br>RGD1559715_predicted                              | 10.2 | 0.000141777 | 0.00304339  |
| 1376673_at | transcription factor 8                                                                                                                         | Tcf8                                                               | 1.6  | 0.000141894 | 0.00304339  |
| 1373072_at | Transcribed locus                                                                                                                              | ---                                                                | 1.5  | 0.000141919 | 0.00304339  |
| 1372167_at | similar to small nuclear ribonucleoprotein polypeptide G                                                                                       | LOC681031 ///<br>LOC686174 ///<br>LOC687679                        | 2.0  | 0.000142106 | 0.003043441 |
| 1373754_at | Similar to Golgi phosphoprotein 2 (Golgi membrane protein GP73)                                                                                | LOC680692                                                          | 2.6  | 0.000144114 | 0.003078434 |

|              |                                                                     |                            |     |             |             |
|--------------|---------------------------------------------------------------------|----------------------------|-----|-------------|-------------|
| 1369649_at   | calcium channel, voltage-dependent, alpha2/delta subunit 1          | Cacna2d1                   | 2.7 | 0.000144569 | 0.003084136 |
| 1387276_at   | activity and neurotransmitter-induced early gene protein 4 (ania-4) | Ania4                      | 2.0 | 0.000145138 | 0.003092277 |
| 1379742_at   | ---                                                                 | ---                        | 2.6 | 0.000147111 | 0.003110839 |
| 1375010_at   | CD68 antigen                                                        | Cd68                       | 6.4 | 0.000147208 | 0.003110839 |
| 1375640_at   | FK506 binding protein 9                                             | Fkbp9                      | 1.7 | 0.000147473 | 0.003110839 |
| 1368947_at   | growth arrest and DNA-damage-inducible 45 alpha                     | Gadd45a                    | 2.8 | 0.000148056 | 0.003118079 |
| 1372282_at   | similar to RIKEN cDNA 2310016C16 (predicted)                        | RGD1307506_predicted       | 1.9 | 0.000149963 | 0.003142146 |
| 1379369_at   | prickle-like 1 (Drosophila)                                         | Prickle1                   | 2.0 | 0.000150363 | 0.0031449   |
| 1372404_at   | RAS-related C3 botulinum substrate 2                                | Rac2                       | 2.9 | 0.000150659 | 0.0031449   |
| 1383179_at   | Transcribed locus                                                   | ---                        | 2.2 | 0.000150668 | 0.0031449   |
| 1368829_at   | fibrillin 1                                                         | Fbn1                       | 2.9 | 0.000151764 | 0.003159775 |
| 1368323_at   | tissue factor pathway inhibitor                                     | Tfpi                       | 1.9 | 0.000153399 | 0.003185736 |
| 1373975_at   | similar to indolethylamine N-methyltransferase                      | LOC368066                  | 2.4 | 0.000156344 | 0.003226539 |
| 1373386_at   | gap junction membrane channel protein beta 2                        | Gjb2                       | 4.4 | 0.000159726 | 0.003272732 |
| 1372500_at   | tropomodulin 3                                                      | Tmod3                      | 2.2 | 0.000160073 | 0.003274722 |
| 1381850_at   | protein phosphatase 1, regulatory (inhibitor) subunit 12A           | Ppp1r12a                   | 5.6 | 0.000163329 | 0.00333305  |
| 1392579_at   | similar to 5830411E10Rik protein                                    | RGD1306658                 | 1.8 | 0.000165169 | 0.003366411 |
| 1388142_at   | chondroitin sulfate proteoglycan 2                                  | Cspg2                      | 3.7 | 0.000167016 | 0.003395647 |
| 1367606_at   | ribosomal protein S3a                                               | Rps3a                      | 1.7 | 0.000167236 | 0.00339593  |
| 1388711_at   | interleukin 13 receptor, alpha 1                                    | Il13ra1                    | 2.2 | 0.000167782 | 0.003398625 |
| 1398774_at   | ribosomal protein L30                                               | Rpl30                      | 1.6 | 0.000168799 | 0.003406638 |
| 1371475_at   | ribonuclease, RNase A family 4                                      | Rnase4                     | 2.6 | 0.000172093 | 0.003458009 |
| 1373065_at   | protein tyrosine phosphatase, non-receptor type 18                  | Ptpn18                     | 2.1 | 0.000172186 | 0.003458009 |
| 1393249_at   | Transcribed locus                                                   | ---                        | 2.5 | 0.000173496 | 0.003469941 |
| 1371349_at   | procollagen, type VI, alpha 1 (predicted)                           | Col6a1_predicted           | 2.6 | 0.000173624 | 0.003469941 |
| 1399158_a_at | nucleophosmin 1                                                     | Npm1                       | 1.6 | 0.000174658 | 0.003482143 |
| 1371998_at   | MOB1, Mps One Binder kinase activator-like 1B (yeast)               | Mobk1b                     | 1.6 | 0.000176237 | 0.003500911 |
| 1368474_at   | vascular cell adhesion molecule 1                                   | Vcam1                      | 2.1 | 0.00017895  | 0.003541958 |
| 1372725_at   | similar to phospholipid scramblase 2                                | LOC315883                  | 3.0 | 0.000179773 | 0.003553526 |
| 1367902_at   | guanine nucleotide binding protein (G protein), gamma 11            | Gng11                      | 2.5 | 0.000180471 | 0.003553526 |
| 1392842_at   | Transcribed locus                                                   | ---                        | 3.9 | 0.000180533 | 0.003553526 |
| 1388340_at   | NS5A (hepatitis C virus) transactivated protein 9                   | Ns5atp9                    | 3.7 | 0.000181832 | 0.003571466 |
| 1389170_at   | caspase 7                                                           | Casp7                      | 3.1 | 0.000182922 | 0.003581795 |
| 1372042_at   | CKLF-like MARVEL transmembrane domain containing 3 (predicted)      | Cmtm3_predicted            | 2.7 | 0.000183485 | 0.00358853  |
| 1376685_at   | Transcribed locus                                                   | ---                        | 1.8 | 0.000184682 | 0.003599975 |
| 1377092_at   | Transcribed locus                                                   | ---                        | 3.1 | 0.000185199 | 0.003599975 |
| 1375363_at   | Transcribed locus                                                   | ---                        | 1.5 | 0.000185724 | 0.003599975 |
| 1371447_at   | placenta-specific 8 (predicted)                                     | Plac8_predicted            | 4.0 | 0.000185821 | 0.003599975 |
| 1388114_at   | myosin light chain, regulatory B                                    | Mrlcb                      | 2.2 | 0.000186724 | 0.003604234 |
| 1370928_at   | LPS-induced TN factor                                               | Litaf                      | 2.2 | 0.000186933 | 0.003604234 |
| 1379285_at   | receptor transporter protein 4 (predicted)                          | Rtp4_predicted             | 6.3 | 0.000186994 | 0.003604234 |
| 1367634_at   | ribosomal protein L31                                               | Rpl31                      | 1.6 | 0.000189275 | 0.003625074 |
| 1371644_at   | protein tyrosine kinase 9                                           | Ptk9                       | 1.6 | 0.00018932  | 0.003625074 |
| 1387113_at   | C-terminal binding protein 2                                        | Ctbp2                      | 3.1 | 0.000190005 | 0.003633959 |
| 1392965_a_at | SPARC related modular calcium binding 2 (predicted)                 | Smoc2_predicted            | 2.7 | 0.000190244 | 0.003634299 |
| 1389796_at   | Transcribed locus                                                   | ---                        | 1.8 | 0.000192694 | 0.003662697 |
| 1372585_at   | RGD1566254 (predicted)                                              | RGD1566254_predicted       | 2.7 | 0.000197451 | 0.003711618 |
| 1395755_at   | ---                                                                 | ---                        | 2.0 | 0.000199402 | 0.003739752 |
| 1383169_at   | Transcribed locus                                                   | ---                        | 1.6 | 0.000201783 | 0.003775794 |
| 1393122_at   | ---                                                                 | ---                        | 1.7 | 0.000205147 | 0.003811252 |
| 1368171_at   | lysyl oxidase                                                       | Lox                        | 3.2 | 0.00020542  | 0.003811252 |
| 1376606_a_at | similar to e(y)2 protein                                            | LOC682575 ///<br>LOC685258 | 1.8 | 0.00020555  | 0.003811252 |
| 1384087_at   | ---                                                                 | ---                        | 1.8 | 0.000205693 | 0.003811252 |

|              |                                                                                                      |                                    |     |             |             |
|--------------|------------------------------------------------------------------------------------------------------|------------------------------------|-----|-------------|-------------|
| 1393956_at   | serine/threonine kinase 17b (apoptosis-inducing)                                                     | Stk17b                             | 1.5 | 0.000206115 | 0.003811252 |
| 1371691_at   | retinoic acid receptor responder (tazarotene induced) 2                                              | Rarres2                            | 1.7 | 0.000206227 | 0.003811252 |
| 1368144_at   | regulator of G-protein signaling 2                                                                   | Rgs2                               | 1.9 | 0.000206546 | 0.003812865 |
| 1382727_at   | ---                                                                                                  | ---                                | 1.7 | 0.000207035 | 0.003817618 |
| 1389554_at   | Transcribed locus                                                                                    | ---                                | 2.0 | 0.000207633 | 0.003819078 |
| 1377243_at   | ---                                                                                                  | ---                                | 2.1 | 0.000207756 | 0.003819078 |
| 1385638_at   | Transcribed locus                                                                                    | ---                                | 2.0 | 0.000207811 | 0.003819078 |
| 1377572_at   | ---                                                                                                  | ---                                | 1.9 | 0.00021153  | 0.003883083 |
| 1373846_at   | similar to RIKEN cDNA 5730434I03 gene (predicted) /// similar to basic transcription factor 3-like 4 | LOC683767 /// RGD1311774_predicted | 1.8 | 0.000213548 | 0.003915763 |
| 1379295_at   | similar to guanine nucleotide binding protein (G protein), gamma transducing activity polypeptide 2  | LOC688154 /// LOC690825            | 1.9 | 0.000214662 | 0.003931797 |
| 1379345_at   | procollagen, type XV                                                                                 | Col15a1                            | 2.4 | 0.000216915 | 0.003964248 |
| 1392452_at   | similar to PHD finger protein 14 isoform 1 (predicted)                                               | RGD1563764_predicted               | 2.5 | 0.000218213 | 0.003983538 |
| 1394490_at   | ATP-binding cassette, sub-family A (ABC1), member 1                                                  | Abca1                              | 3.3 | 0.000221753 | 0.004025815 |
| 1387144_at   | integrin alpha 1                                                                                     | Itga1                              | 1.9 | 0.000223388 | 0.004048591 |
| 1384254_at   | similar to OTU domain containing 1 (predicted)                                                       | RGD1563344_predicted               | 2.6 | 0.000224376 | 0.004056321 |
| 1387817_at   | neuron specific gene family member 1                                                                 | Nsg1                               | 2.3 | 0.00022442  | 0.004056321 |
| 1383912_at   | similar to Protein C6orf115                                                                          | LOC684848 /// LOC685045            | 1.8 | 0.000225629 | 0.004069235 |
| 1389832_at   | glutathione S-transferase omega 1                                                                    | Gsto1                              | 1.5 | 0.000226808 | 0.004084059 |
| 1372343_at   | exosome component 8 (predicted)                                                                      | Exosc8_predicted                   | 1.8 | 0.000226947 | 0.004084059 |
| 1374927_at   | Transcribed locus                                                                                    | ---                                | 2.2 | 0.000236328 | 0.004180784 |
| 1382778_at   | Dual specificity phosphatase 6                                                                       | Dusp6                              | 2.6 | 0.000236874 | 0.004180784 |
| 1393795_at   | zinc finger homeobox 1b                                                                              | Zfx1b                              | 3.4 | 0.000240519 | 0.004235611 |
| 1374854_at   | similar to Pin2-interacting protein X1 (predicted)                                                   | RGD1566025_predicted               | 1.9 | 0.000242703 | 0.004260391 |
| 1368419_at   | ceruloplasmin                                                                                        | Cp                                 | 3.0 | 0.000243773 | 0.004272382 |
| 1386882_at   | t-complex testis expressed 1                                                                         | Tctex1                             | 2.0 | 0.000244172 | 0.004272488 |
| 1393796_at   | centrosomal protein 152 (predicted)                                                                  | Cep152_predicted                   | 1.6 | 0.00024513  | 0.004283997 |
| 1377221_at   | Transcribed locus                                                                                    | ---                                | 1.6 | 0.000245351 | 0.004283997 |
| 1373439_at   | Transcribed locus                                                                                    | ---                                | 1.8 | 0.000245814 | 0.00428753  |
| 1373610_at   | SEC24 related gene family, member D (S. cerevisiae) (predicted)                                      | Sec24d_predicted                   | 2.0 | 0.00024643  | 0.004293734 |
| 1389732_at   | Similar to CG4025-PA                                                                                 | LOC679937                          | 3.1 | 0.00024695  | 0.004298236 |
| 1367786_at   | proteasome (prosome, macropain) subunit, beta type 8                                                 | Psmb8                              | 3.2 | 0.000248111 | 0.004309324 |
| 1388455_at   | guanine nucleotide binding protein (G protein), gamma 10                                             | Gng10                              | 1.5 | 0.000250256 | 0.004332845 |
| 1388431_at   | synovial sarcoma translocation, Chromosome 18                                                        | Ss18                               | 1.7 | 0.000251221 | 0.00434498  |
| 1383936_at   | Elastin microfibril interfacier 2 (predicted)                                                        | Emilin2_predicted                  | 2.1 | 0.000255821 | 0.004410634 |
| 1389857_at   | WW domain binding protein 5 (predicted)                                                              | Wbp5_predicted                     | 2.1 | 0.000256138 | 0.004411472 |
| 1383501_at   | Transcribed locus                                                                                    | ---                                | 2.4 | 0.000256768 | 0.004415913 |
| 1368990_at   | cytochrome P450, family 1, subfamily b, polypeptide 1                                                | Cyp1b1                             | 2.0 | 0.000256933 | 0.004415913 |
| 1369788_s_at | Jun oncogene                                                                                         | Jun                                | 2.7 | 0.000259589 | 0.004452263 |
| 1398907_at   | ORM1-like 2 (S. cerevisiae) (predicted)                                                              | Ormdl2_predicted                   | 1.8 | 0.000260118 | 0.004454917 |
| 1377114_at   | ---                                                                                                  | ---                                | 3.3 | 0.000261576 | 0.00446308  |
| 1367925_at   | major vault protein                                                                                  | Mvp                                | 1.7 | 0.000262467 | 0.004468034 |
| 1390373_at   | Transcribed locus                                                                                    | ---                                | 1.9 | 0.000263307 | 0.004473593 |
| 1379739_at   | Transcribed locus                                                                                    | ---                                | 1.9 | 0.000263553 | 0.004473593 |
| 1391094_at   | Transcribed locus                                                                                    | ---                                | 1.9 | 0.000264045 | 0.00447733  |
| 1378551_at   | cytochrome P450, family 20, subfamily A, polypeptide 1                                               | Cyp20a1                            | 1.7 | 0.000264455 | 0.004479667 |
| 1374718_at   | Transcribed locus                                                                                    | ---                                | 2.4 | 0.000268873 | 0.004540484 |
| 1367749_at   | lumican                                                                                              | Lum                                | 2.7 | 0.000269775 | 0.004541834 |
| 1369720_at   | myosin Ib                                                                                            | Myo1b                              | 2.0 | 0.000269782 | 0.004541834 |
| 1369947_at   | cathepsin K                                                                                          | Ctsk                               | 3.0 | 0.000270665 | 0.004549291 |
| 1372365_at   | Ras and Rab interactor 2 (predicted)                                                                 | Rin2_predicted                     | 1.7 | 0.000270778 | 0.004549291 |

|              |                                                                                                                  |                                                                                          |     |             |             |
|--------------|------------------------------------------------------------------------------------------------------------------|------------------------------------------------------------------------------------------|-----|-------------|-------------|
| 1373148_at   | carboxypeptidase X 2 (M14 family) (predicted)                                                                    | Cpxm2_predicted                                                                          | 2.8 | 0.000274711 | 0.004596585 |
| 1391489_at   | immunity-related GTPase family, M                                                                                | Irgm                                                                                     | 3.2 | 0.000275915 | 0.004600963 |
| 1388745_at   | sema domain, immunoglobulin domain (Ig), transmembrane domain (TM) and short cytoplasmic domain, (semaphorin) 4A | Sema4a                                                                                   | 1.7 | 0.000276371 | 0.004600963 |
| 1386881_at   | insulin-like growth factor binding protein 3                                                                     | Igfbp3                                                                                   | 3.0 | 0.000277548 | 0.004608172 |
| 1380079_at   | similar to mKIAA2005 protein                                                                                     | LOC500015                                                                                | 2.0 | 0.000277569 | 0.004608172 |
| 1388511_at   | centaurin, delta 2                                                                                               | Centd2                                                                                   | 1.6 | 0.000280001 | 0.004633263 |
| 1381190_at   | ---                                                                                                              | ---                                                                                      | 3.6 | 0.000281458 | 0.004643352 |
| 1371504_at   | RGD1561181 (predicted) /// similar to 60S ribosomal protein L37a                                                 | LOC679823 ///<br>LOC687187 ///<br>LOC688094 ///<br>LOC689401 ///<br>RGD1561181_predicted | 1.5 | 0.000285384 | 0.004693989 |
| 1375714_at   | similar to ErbB2 interacting protein isoform 2 (predicted)                                                       | RGD1562952_predicted                                                                     | 2.5 | 0.000285976 | 0.004695834 |
| 1372070_at   | interferon gamma inducible protein 30                                                                            | Ifi30                                                                                    | 3.0 | 0.000287001 | 0.004697113 |
| 1377974_at   | Integrin beta 8 (predicted)                                                                                      | Itgb8_predicted                                                                          | 1.9 | 0.000290944 | 0.004756898 |
| 1385426_at   | similar to hypothetical protein FLJ20647 (predicted)                                                             | RGD1305326_predicted                                                                     | 2.1 | 0.000292121 | 0.004770133 |
| 1367777_at   | 2,4-dienoyl CoA reductase 1, mitochondrial                                                                       | Decr1                                                                                    | 1.5 | 0.000293313 | 0.004781377 |
| 1377794_at   | Transcribed locus                                                                                                | ---                                                                                      | 1.6 | 0.000294054 | 0.00478871  |
| 1378453_at   | ---                                                                                                              | ---                                                                                      | 2.1 | 0.000294591 | 0.004792714 |
| 1377161_at   | Transcribed locus                                                                                                | ---                                                                                      | 3.0 | 0.000295256 | 0.00479878  |
| 1373923_at   | Transcribed locus                                                                                                | ---                                                                                      | 3.4 | 0.000298521 | 0.004836983 |
| 1389229_at   | acid phosphatase-like 2                                                                                          | Acpl2                                                                                    | 1.7 | 0.000298783 | 0.004836983 |
| 1383164_at   | Transcribed locus                                                                                                | ---                                                                                      | 2.4 | 0.0003017   | 0.0048665   |
| 1372234_at   | similar to Lix1 homolog (mouse) like                                                                             | LOC499677                                                                                | 2.0 | 0.000301723 | 0.0048665   |
| 1375877_at   | synaptotagmin IV                                                                                                 | Syt4                                                                                     | 1.7 | 0.000303617 | 0.004878719 |
| 1373959_at   | protein phosphatase 2 (formerly 2A), regulatory subunit A (PR 65), beta isoform                                  | Ppp2r1b                                                                                  | 1.9 | 0.000303733 | 0.004878719 |
| 1374468_at   | myeloid differentiation primary response gene 88                                                                 | Myd88                                                                                    | 2.1 | 0.000308703 | 0.004948877 |
| 1389568_at   | similar to RIKEN cDNA 2810048G17 gene                                                                            | RGD1308276                                                                               | 1.6 | 0.000310128 | 0.004966875 |
| 1376204_at   | Transcribed locus                                                                                                | ---                                                                                      | 2.7 | 0.000311608 | 0.004985605 |
| 1383947_at   | ---                                                                                                              | ---                                                                                      | 1.5 | 0.00031315  | 0.004995824 |
| 1382181_at   | similar to RIKEN cDNA A530088I07 gene                                                                            | LOC311984                                                                                | 1.9 | 0.00031416  | 0.005007076 |
| 1392180_at   | Sp1 transcription factor                                                                                         | Sp1                                                                                      | 2.0 | 0.000314495 | 0.005007571 |
| 1392648_at   | mannose receptor, C type 1 (predicted)                                                                           | Mrc1_predicted                                                                           | 3.1 | 0.000315326 | 0.005015945 |
| 1392234_at   | Transcribed locus                                                                                                | ---                                                                                      | 2.6 | 0.000316778 | 0.005029307 |
| 1388666_at   | ectodermal-neural cortex 1                                                                                       | Enc1                                                                                     | 2.0 | 0.000320983 | 0.005081353 |
| 1387195_at   | suppression of tumorigenicity 14 (colon carcinoma)                                                               | St14                                                                                     | 1.8 | 0.00032147  | 0.005084166 |
| 1391181_at   | Transcribed locus                                                                                                | ---                                                                                      | 1.6 | 0.000322026 | 0.005086271 |
| 1382366_at   | phosphatidylinositol 3-kinase, catalytic, alpha polypeptide /// hypothetical gene supported by AF395897          | LOC367779 /// Pik3ca                                                                     | 1.6 | 0.000322389 | 0.005086271 |
| 1367723_a_at | linker of T-cell receptor pathways                                                                               | Lnk                                                                                      | 2.6 | 0.00032286  | 0.005086271 |
| 1376891_at   | Transcribed locus                                                                                                | ---                                                                                      | 2.0 | 0.000322953 | 0.005086271 |
| 1393458_s_at | similar to PHD finger protein 14 isoform 1 (predicted)                                                           | RGD1563764_predicted                                                                     | 1.8 | 0.000323344 | 0.005086271 |
| 1398600_at   | Transcribed locus                                                                                                | ---                                                                                      | 1.9 | 0.000323458 | 0.005086271 |
| 1399096_at   | Transcribed locus                                                                                                | ---                                                                                      | 1.8 | 0.000326372 | 0.00511254  |
| 1398751_at   | ribosomal protein S7 /// similar to ribosomal protein S7                                                         | LOC497813 /// Rps7                                                                       | 2.0 | 0.00032713  | 0.005119537 |
| 1387675_at   | ---                                                                                                              | ---                                                                                      | 2.8 | 0.000328054 | 0.005129125 |
| 1398872_at   | ribosomal protein S13 /// similar to ribosomal protein S13                                                       | LOC683961 ///<br>LOC684988 /// Rps13                                                     | 1.9 | 0.000329901 | 0.005148206 |
| 1397917_at   | ---                                                                                                              | ---                                                                                      | 1.9 | 0.000331907 | 0.005163352 |
| 1382522_at   | matrin 3                                                                                                         | Matr3                                                                                    | 1.7 | 0.000333705 | 0.005173216 |

|              |                                                                                                                                                                                                                                                                     |                                    |     |             |             |
|--------------|---------------------------------------------------------------------------------------------------------------------------------------------------------------------------------------------------------------------------------------------------------------------|------------------------------------|-----|-------------|-------------|
| 1377826_at   | Transcribed locus                                                                                                                                                                                                                                                   | ---                                | 2.3 | 0.000337642 | 0.005196847 |
| 1398383_at   | cytochrome b-561 (predicted)                                                                                                                                                                                                                                        | Cyb561_predicted                   | 1.8 | 0.000337812 | 0.005196847 |
| 1369960_at   | FXYD domain-containing ion transport regulator 1                                                                                                                                                                                                                    | Fxyd1                              | 1.7 | 0.000338289 | 0.005196847 |
| 1373997_at   | Similar to Drctnnb1a (predicted)                                                                                                                                                                                                                                    | RGD1562906_predicted               | 1.6 | 0.000344001 | 0.005262579 |
| 1374535_at   | similar to expressed sequence AU041783 (predicted)                                                                                                                                                                                                                  | RGD1310668_predicted               | 2.0 | 0.000344269 | 0.005262579 |
| 1379425_at   | similar to RIKEN cDNA 3110037116 (predicted)                                                                                                                                                                                                                        | RGD1309802_predicted               | 2.4 | 0.000346231 | 0.005285857 |
| 1388199_at   | tumor-associated calcium signal transducer 1                                                                                                                                                                                                                        | Tacstd1                            | 2.8 | 0.000346434 | 0.005285857 |
| 1376599_at   | ATPase family, AAA domain containing 2 (predicted)                                                                                                                                                                                                                  | Atad2_predicted                    | 1.8 | 0.000349161 | 0.005302858 |
| 1392074_at   | similar to hypothetical protein FLJ21986                                                                                                                                                                                                                            | LOC500046                          | 2.2 | 0.000349888 | 0.005306176 |
| 1396411_at   | phosphatidylinositol 3-kinase, catalytic, alpha polypeptide /// hypothetical gene supported by AF395897 /// similar to Phosphatidylinositol-4,5-bisphosphate 3-kinase catalytic subunit alpha isoform (PI3-kinase p110 subunit alpha) (PtdIns-3-kinase p110) (PI3K) | LOC367779 /// LOC685590 /// Pik3ca | 2.0 | 0.000353748 | 0.00534292  |
| 1373866_at   | similar to hypothetical protein FLJ13448                                                                                                                                                                                                                            | RGD1359509                         | 1.5 | 0.000357063 | 0.005388042 |
| 1398789_at   | ribosomal protein L37                                                                                                                                                                                                                                               | Rpl37                              | 1.5 | 0.00035767  | 0.005392265 |
| 1389034_at   | ubiquitin specific peptidase 18                                                                                                                                                                                                                                     | Usp18                              | 8.2 | 0.000359748 | 0.005408714 |
| 1379495_at   | Plexin domain containing 2 (predicted)                                                                                                                                                                                                                              | Plxdc2_predicted                   | 1.9 | 0.000363183 | 0.005445433 |
| 1377705_at   | Transcribed locus, moderately similar to XP_574280.1 similar to Ab2-143 [Rattus norvegicus]                                                                                                                                                                         | ---                                | 1.7 | 0.000365179 | 0.005460426 |
| 1372027_at   | Transcribed locus                                                                                                                                                                                                                                                   | ---                                | 1.7 | 0.000374065 | 0.005552902 |
| 1387351_at   | fibrillin 1                                                                                                                                                                                                                                                         | Fbn1                               | 2.0 | 0.000375879 | 0.005568157 |
| 1390425_at   | Transcribed locus                                                                                                                                                                                                                                                   | ---                                | 1.6 | 0.000376108 | 0.005568157 |
| 1367901_at   | glucuronidase, beta                                                                                                                                                                                                                                                 | Gusb                               | 1.6 | 0.000378009 | 0.005586242 |
| 1393128_at   | similar to RIKEN cDNA 2610029K21                                                                                                                                                                                                                                    | RGD1311086                         | 1.9 | 0.000380633 | 0.005615439 |
| 1373210_at   | laminin, beta 1 (predicted)                                                                                                                                                                                                                                         | Lamb1_predicted                    | 1.9 | 0.00038135  | 0.005615439 |
| 1384068_at   | cytoskeleton associated protein 2 (predicted)                                                                                                                                                                                                                       | Ckap2_predicted                    | 3.5 | 0.000382473 | 0.005626932 |
| 1385155_at   | leucine rich repeat (in FLII) interacting protein 1                                                                                                                                                                                                                 | Lrrfip1                            | 1.9 | 0.000384075 | 0.005645462 |
| 1377117_at   | ---                                                                                                                                                                                                                                                                 | ---                                | 1.8 | 0.000386489 | 0.005670797 |
| 1368921_a_at | CD44 antigen                                                                                                                                                                                                                                                        | Cd44                               | 2.1 | 0.000390691 | 0.005715792 |
| 1392899_at   | protein regulator of cytokinesis 1 (predicted)                                                                                                                                                                                                                      | Prc1_predicted                     | 2.4 | 0.000390853 | 0.005715792 |
| 1378110_at   | Transcribed locus                                                                                                                                                                                                                                                   | ---                                | 2.0 | 0.000390945 | 0.005715792 |
| 1389477_at   | Transcribed locus                                                                                                                                                                                                                                                   | ---                                | 1.4 | 0.000395919 | 0.005769901 |
| 1390907_at   | similar to zinc finger protein 84 (HPF2)                                                                                                                                                                                                                            | LOC687219 /// LOC691170            | 1.6 | 0.000396049 | 0.005769901 |
| 1398852_at   | ribosomal protein S21                                                                                                                                                                                                                                               | Rps21                              | 1.5 | 0.000398023 | 0.005793531 |
| 1390443_at   | Transcribed locus                                                                                                                                                                                                                                                   | ---                                | 1.9 | 0.000399735 | 0.005813304 |
| 1371498_at   | JTV1                                                                                                                                                                                                                                                                | MGC125271                          | 1.5 | 0.000402264 | 0.005832432 |
| 1373646_at   | RAB15, member RAS oncogene family                                                                                                                                                                                                                                   | Rab15                              | 2.5 | 0.000403335 | 0.005833935 |
| 1388880_at   | Transcribed locus                                                                                                                                                                                                                                                   | ---                                | 3.8 | 0.000403992 | 0.005833935 |
| 1377706_x_at | Transcribed locus, moderately similar to XP_574280.1 similar to Ab2-143 [Rattus norvegicus]                                                                                                                                                                         | ---                                | 1.7 | 0.000404539 | 0.005836713 |
| 1388678_at   | ---                                                                                                                                                                                                                                                                 | ---                                | 1.7 | 0.000407531 | 0.005864456 |
| 1389618_at   | Transcribed locus                                                                                                                                                                                                                                                   | ---                                | 2.1 | 0.000408216 | 0.005869181 |
| 1383131_at   | integrin beta 2                                                                                                                                                                                                                                                     | Itgb2                              | 2.3 | 0.00040859  | 0.005869417 |
| 1381382_at   | similar to Vacuolar ATP synthase subunit S1 precursor (V-ATPase S1 subunit) (predicted)                                                                                                                                                                             | RGD1564936_predicted               | 1.8 | 0.00041382  | 0.005929016 |
| 1375523_at   | similar to Myristoylated alanine-rich C-kinase substrate (MARCKS) (ACAMP-81) /// similar to Myristoylated alanine-rich C-kinase substrate (MARCKS) (Protein kinase C substrate 80 kDa protein)                                                                      | LOC294446 /// LOC681252            | 1.8 | 0.00041473  | 0.005936882 |
| 1393347_at   | integrin alpha L                                                                                                                                                                                                                                                    | Itgal                              | 2.7 | 0.000416734 | 0.005944877 |
| 1367764_at   | cyclin G1                                                                                                                                                                                                                                                           | Ccng1                              | 1.7 | 0.000420241 | 0.005976639 |

|              |                                                                                                                                                      |                                                                                                              |     |             |             |
|--------------|------------------------------------------------------------------------------------------------------------------------------------------------------|--------------------------------------------------------------------------------------------------------------|-----|-------------|-------------|
| 1382094_at   | ---                                                                                                                                                  | ---                                                                                                          | 2.0 | 0.000421177 | 0.005982314 |
| 1385051_at   | Guanylate nucleotide binding protein 4 (predicted)                                                                                                   | Gbp4_predicted                                                                                               | 3.6 | 0.000423922 | 0.006005749 |
| 1390109_at   | ---                                                                                                                                                  | ---                                                                                                          | 1.7 | 0.000425135 | 0.006017745 |
| 1384032_at   | Transcribed locus                                                                                                                                    | ---                                                                                                          | 1.7 | 0.000426197 | 0.006027584 |
| 1398796_at   | transmembrane emp24-like trafficking protein 10 (yeast)                                                                                              | Tmed10                                                                                                       | 1.5 | 0.000429391 | 0.006062331 |
| 1393352_at   | similar to hypothetical protein MGC38960 (predicted)                                                                                                 | RGD1310552_predicted                                                                                         | 1.7 | 0.000431436 | 0.006076409 |
| 1371989_at   | high mobility group nucleosomal binding domain 3                                                                                                     | Hmgn3                                                                                                        | 1.8 | 0.000436718 | 0.006134195 |
| 1393853_at   | ---                                                                                                                                                  | ---                                                                                                          | 3.4 | 0.000439689 | 0.0061549   |
| 1382277_at   | ---                                                                                                                                                  | ---                                                                                                          | 2.6 | 0.000441443 | 0.006174191 |
| 1396803_at   | THO complex 2 (predicted)                                                                                                                            | Thoc2_predicted                                                                                              | 1.9 | 0.000444323 | 0.006203924 |
| 1377414_at   | similar to DNA segment, Chr 19, ERATO Doi 386, expressed (predicted)                                                                                 | RGD1307934_predicted                                                                                         | 1.7 | 0.000445811 | 0.006219418 |
| 1392386_at   | CASP8 and FADD-like apoptosis regulator                                                                                                              | Cflar                                                                                                        | 1.9 | 0.000451186 | 0.006278439 |
| 1386987_at   | interleukin 6 receptor, alpha                                                                                                                        | Il6ra                                                                                                        | 2.5 | 0.000456333 | 0.006339329 |
| 1370956_at   | decorin                                                                                                                                              | Dcn                                                                                                          | 2.2 | 0.000459781 | 0.006360372 |
| 1383075_at   | cyclin D1                                                                                                                                            | Ccnd1                                                                                                        | 2.9 | 0.000461178 | 0.006373485 |
| 1388930_at   | transmembrane protein 123                                                                                                                            | Tmem123                                                                                                      | 1.9 | 0.000462627 | 0.006383626 |
| 1368650_at   | Kruppel-like factor 10                                                                                                                               | Klf10                                                                                                        | 1.9 | 0.000467748 | 0.006438091 |
| 1368412_a_at | protein tyrosine phosphatase, receptor type, O                                                                                                       | Ptpro                                                                                                        | 2.5 | 0.000468433 | 0.006442127 |
| 1395042_at   | EH domain binding protein 1 (predicted)                                                                                                              | Ehbp1_predicted                                                                                              | 1.6 | 0.000471334 | 0.006469437 |
| 1367676_at   | high mobility group box 2 /// similar to High mobility group protein 2 (HMG-2) (predicted) /// similar to High mobility group protein 2 (HMG-2)      | Hmgb2 /// LOC680704 /// LOC682545 /// RGD1559962_predicted /// RGD1561694_predicted /// RGD1564519_predicted | 3.6 | 0.00047138  | 0.006469437 |
| 1376799_a_at | cytokine receptor-like factor 1 (predicted)                                                                                                          | Crif1_predicted                                                                                              | 4.8 | 0.000471599 | 0.006469437 |
| 1370531_a_at | phospholipase D1                                                                                                                                     | Pld1                                                                                                         | 1.9 | 0.000472361 | 0.006474489 |
| 1384380_at   | Zinc finger, CCHC domain containing 7 (predicted)                                                                                                    | Zcchc7_predicted                                                                                             | 1.6 | 0.000475958 | 0.006507527 |
| 1372815_at   | mago-nashi homolog, proliferation-associated (Drosophila) (predicted)                                                                                | Magoh_predicted                                                                                              | 1.8 | 0.00047786  | 0.00652811  |
| 1369670_at   | Cd200 antigen                                                                                                                                        | Cd200                                                                                                        | 1.5 | 0.000480091 | 0.006547713 |
| 1370810_at   | cyclin D2                                                                                                                                            | Ccnd2                                                                                                        | 2.7 | 0.000480576 | 0.006548889 |
| 1373843_at   | Transcribed locus                                                                                                                                    | ---                                                                                                          | 1.9 | 0.000481353 | 0.006554052 |
| 1379604_at   | apolipoprotein L, 3 /// similar to apolipoprotein L, 3 (predicted)                                                                                   | Apol3 /// LOC681351                                                                                          | 1.5 | 0.000482039 | 0.006557965 |
| 1384139_at   | gap junction membrane channel protein alpha 7                                                                                                        | Gja7                                                                                                         | 3.1 | 0.000483709 | 0.006569808 |
| 1383753_at   | ---                                                                                                                                                  | ---                                                                                                          | 1.7 | 0.000486808 | 0.006590133 |
| 1388816_at   | Discs, large homolog 1 (Drosophila)                                                                                                                  | Dlgh1                                                                                                        | 1.4 | 0.000489532 | 0.006615438 |
| 1382009_at   | chromodomain helicase DNA binding protein 1 (predicted)                                                                                              | Chd1_predicted                                                                                               | 1.6 | 0.000490193 | 0.006615438 |
| 1383392_at   | complement component 2                                                                                                                               | C2                                                                                                           | 2.0 | 0.000490909 | 0.006615438 |
| 1398886_at   | similar to Selenoprotein H (predicted)                                                                                                               | RGD1563348_predicted                                                                                         | 1.6 | 0.000493864 | 0.006647357 |
| 1367710_at   | proteasome (prosome, macropain) 28 subunit, beta                                                                                                     | Psme2                                                                                                        | 1.4 | 0.000499684 | 0.006709233 |
| 1393227_at   | ---                                                                                                                                                  | ---                                                                                                          | 2.9 | 0.000505543 | 0.006771508 |
| 1386874_at   | ribosomal protein S15                                                                                                                                | Rps15                                                                                                        | 1.5 | 0.000509827 | 0.006817585 |
| 1380063_at   | cholesterol 25-hydroxylase                                                                                                                           | Ch25h                                                                                                        | 2.0 | 0.000512372 | 0.00684606  |
| 1379982_at   | Transcribed locus                                                                                                                                    | ---                                                                                                          | 1.9 | 0.000516492 | 0.006873191 |
| 1385458_a_at | similar to C11orf17 protein (predicted)                                                                                                              | RGD1306959_predicted                                                                                         | 2.2 | 0.000516931 | 0.006873472 |
| 1384889_at   | Transcribed locus                                                                                                                                    | ---                                                                                                          | 2.1 | 0.000523575 | 0.006942942 |
| 1388947_at   | eukaryotic translation initiation factor 5B /// similar to Eukaryotic translation initiation factor 5B (eIF-5B) (Translation initiation factor IF-2) | Eif5b /// LOC686553 /// LOC689581                                                                            | 1.5 | 0.000524353 | 0.006942942 |

|              |                                                                                                                                                                  |                                                        |     |             |             |
|--------------|------------------------------------------------------------------------------------------------------------------------------------------------------------------|--------------------------------------------------------|-----|-------------|-------------|
| 1368533_at   | hephaestin                                                                                                                                                       | Heph                                                   | 1.9 | 0.000524808 | 0.006942942 |
| 1373463_at   | procollagen, type V, alpha 2                                                                                                                                     | Col5a2                                                 | 2.8 | 0.00052502  | 0.006942942 |
| 1389791_at   | ceroid-lipofuscinosis, neuronal 8                                                                                                                                | Cln8                                                   | 1.6 | 0.000531775 | 0.007000008 |
| 1379400_at   | Transcribed locus                                                                                                                                                | ---                                                    | 1.9 | 0.000532197 | 0.007000008 |
| 1368331_at   | chitinase, di-N-acetyl-                                                                                                                                          | Ctbs                                                   | 1.5 | 0.000532406 | 0.007000008 |
| 1388827_at   | H2A histone family, member V (predicted) /// similar to H2A histone family, member V isoform 1 (predicted) /// similar to H2A histone family, member V isoform 1 | H2afv_predicted /// LOC685909 /// RGD1560813_predicted | 1.9 | 0.000534068 | 0.007007317 |
| 1377761_at   | glutamine-fructose-6-phosphate transaminase 2                                                                                                                    | Gfpt2                                                  | 1.8 | 0.000534646 | 0.007007317 |
| 1371973_at   | eukaryotic translation initiation factor 3, subunit 6                                                                                                            | Eif3s6                                                 | 1.6 | 0.000535074 | 0.007007317 |
| 1375796_at   | interferon gamma induced GTPase                                                                                                                                  | Igtp                                                   | 5.2 | 0.000535092 | 0.007007317 |
| 1389226_at   | stromal antigen 1 (predicted)                                                                                                                                    | Stag1_predicted                                        | 1.5 | 0.000536052 | 0.007010127 |
| 1369342_at   | ATPase, Cu++ transporting, alpha polypeptide                                                                                                                     | Atp7a                                                  | 1.6 | 0.000536159 | 0.007010127 |
| 1381859_at   | similar to F33H2.2                                                                                                                                               | LOC684063 /// LOC689997                                | 1.8 | 0.000545478 | 0.007103739 |
| 1373644_at   | nuclear factor I/B                                                                                                                                               | Nfib                                                   | 1.6 | 0.000547093 | 0.007113503 |
| 1384163_at   | Transcribed locus                                                                                                                                                | ---                                                    | 1.6 | 0.000548679 | 0.007122869 |
| 1372029_at   | similar to mannose-6-phosphate receptor binding protein 1                                                                                                        | LOC316130                                              | 1.5 | 0.000549172 | 0.007123646 |
| 1371330_at   | ribosomal protein L11                                                                                                                                            | Rpl11                                                  | 1.7 | 0.000552062 | 0.007144225 |
| 1367623_at   | ribosomal protein L18                                                                                                                                            | Rpl18                                                  | 1.5 | 0.000553874 | 0.007153232 |
| 1372818_at   | collectin sub-family member 12                                                                                                                                   | Colec12                                                | 3.5 | 0.000553924 | 0.007153232 |
| 1393832_at   | similar to RIKEN cDNA 0610033105                                                                                                                                 | RGD1306676                                             | 2.2 | 0.000555245 | 0.007162885 |
| 1375215_x_at | pyroglutamyl-peptidase I                                                                                                                                         | Pgpep1                                                 | 1.6 | 0.000559626 | 0.007213733 |
| 1367767_at   | 3-hydroxy-3-methylglutaryl-Coenzyme A lyase                                                                                                                      | Hmgcl                                                  | 1.5 | 0.000562274 | 0.007242189 |
| 1387875_at   | PTK2 protein tyrosine kinase 2                                                                                                                                   | Ptk2                                                   | 1.6 | 0.000565413 | 0.007271242 |
| 1387932_at   | solute carrier family 1 (neuronal/epithelial high affinity glutamate transporter, system Xag), member 1                                                          | Slc1a1                                                 | 1.5 | 0.000566015 | 0.007273295 |
| 1388866_at   | Transcribed locus                                                                                                                                                | ---                                                    | 1.6 | 0.000567649 | 0.007288593 |
| 1374222_at   | solute carrier family 22 (organic cation transporter), member 18                                                                                                 | Slc22a18                                               | 1.8 | 0.000568357 | 0.00729108  |
| 1380416_at   | Transcribed locus                                                                                                                                                | ---                                                    | 1.8 | 0.000569436 | 0.007294461 |
| 1371527_at   | epithelial membrane protein 1                                                                                                                                    | Emp1                                                   | 2.6 | 0.000571376 | 0.007313614 |
| 1370253_at   | ribosomal protein L22                                                                                                                                            | Rpl22                                                  | 2.2 | 0.000578094 | 0.007362322 |
| 1389761_at   | Transcribed locus                                                                                                                                                | ---                                                    | 2.3 | 0.000578605 | 0.007362322 |
| 1367846_at   | S100 calcium-binding protein A4                                                                                                                                  | S100a4                                                 | 2.2 | 0.000581895 | 0.0073796   |
| 1375170_at   | S100 calcium binding protein A11 (calizzarin)                                                                                                                    | S100a11                                                | 1.6 | 0.000584978 | 0.007394963 |
| 1390312_at   | similar to mKIAA2005 protein (predicted) /// similar to sterile alpha motif domain containing 9-like /// similar to mKIAA2005 protein                            | LOC500013 /// LOC500015 /// RGD1561472_predicted       | 2.1 | 0.000585616 | 0.007394963 |
| 1367880_at   | laminin, beta 2                                                                                                                                                  | Lamb2                                                  | 1.9 | 0.000597288 | 0.007510856 |
| 1374298_at   | Transcribed locus                                                                                                                                                | ---                                                    | 1.9 | 0.000599343 | 0.007530935 |
| 1391630_at   | Transcribed locus                                                                                                                                                | ---                                                    | 4.0 | 0.000600004 | 0.007533482 |
| 1374292_at   | similar to RIKEN cDNA 1110031102                                                                                                                                 | RGD1305007                                             | 1.6 | 0.000600906 | 0.007539052 |
| 1378671_at   | CREB binding protein                                                                                                                                             | Crebbp                                                 | 1.5 | 0.00060919  | 0.007625543 |
| 1388622_at   | nucleolar protein 5A                                                                                                                                             | Nol5a                                                  | 1.7 | 0.000611912 | 0.007652108 |
| 1384875_at   | Transcribed locus                                                                                                                                                | ---                                                    | 1.7 | 0.000612349 | 0.007652108 |
| 1373186_at   | similar to RIKEN cDNA 5033405K12 (predicted)                                                                                                                     | RGD1311593_predicted                                   | 2.0 | 0.000613464 | 0.007655729 |
| 1378754_at   | Transcribed locus                                                                                                                                                | ---                                                    | 2.1 | 0.000616949 | 0.007681744 |
| 1372693_at   | heterogeneous nuclear ribonucleoprotein A1                                                                                                                       | Hnrpa1                                                 | 1.7 | 0.000623087 | 0.007736935 |
| 1379703_at   | hypothetical LOC315055 (predicted)                                                                                                                               | RGD1311559_predicted                                   | 1.7 | 0.000624951 | 0.007752033 |
| 1378172_at   | Phosphatase and actin regulator 2                                                                                                                                | Phactr2                                                | 1.6 | 0.000626928 | 0.007770698 |
| 1388408_at   | similar to RIKEN cDNA 1110020C13                                                                                                                                 | RGD1307129                                             | 1.6 | 0.000628987 | 0.007790346 |
| 1395204_at   | Transcribed locus                                                                                                                                                | ---                                                    | 2.7 | 0.000630956 | 0.007808467 |

|              |                                                                                                                    |                                   |     |             |             |
|--------------|--------------------------------------------------------------------------------------------------------------------|-----------------------------------|-----|-------------|-------------|
| 1374449_at   | cell division cycle associated 3 /// similar to cell division cycle associated 3 (predicted)                       | Cdca3 /// RGD1562067_predicted ed | 4.6 | 0.000634025 | 0.007823282 |
| 1377168_at   | copine family member IX                                                                                            | Cpne9                             | 2.5 | 0.000636173 | 0.00783217  |
| 1396494_at   | Patched homolog 1 (Drosophila)                                                                                     | Ptch1                             | 2.2 | 0.000638324 | 0.007852768 |
| 1374390_at   | similar to Protein UNQ655/PRO1286 homolog precursor                                                                | LOC686324 /// LOC690344           | 1.9 | 0.000639092 | 0.007856347 |
| 1387917_at   | torsin A interacting protein 1                                                                                     | Tor1aip1                          | 1.6 | 0.000640641 | 0.007859516 |
| 1398319_at   | Nclone10 mRNA                                                                                                      | ---                               | 2.1 | 0.000640784 | 0.007859516 |
| 1370866_at   | ribosomal protein L41                                                                                              | Rpl41                             | 1.5 | 0.00064506  | 0.007898088 |
| 1384948_at   | trichorhinophalangeal syndrome I (predicted)                                                                       | Trps1_predicted                   | 2.3 | 0.000645369 | 0.007898088 |
| 1377262_at   | similar to KIAA2010 protein (predicted)                                                                            | RGD1309450_predicted ed           | 1.8 | 0.000656648 | 0.008000403 |
| 1384507_at   | similar to hypothetical protein FLJ11127                                                                           | LOC310190                         | 2.1 | 0.000657594 | 0.008006005 |
| 1368835_at   | signal transducer and activator of transcription 1                                                                 | Stat1                             | 2.0 | 0.000658623 | 0.008012591 |
| 1390348_at   | folate receptor 2 (fetal) (predicted)                                                                              | Folr2_predicted                   | 2.9 | 0.000660538 | 0.008024028 |
| 1373699_at   | Transcribed locus                                                                                                  | ---                               | 2.7 | 0.000663272 | 0.008045758 |
| 1370605_s_at | leptin receptor                                                                                                    | Lepr                              | 2.0 | 0.000668895 | 0.00809021  |
| 1368901_at   | thrombomodulin                                                                                                     | Thbd                              | 3.0 | 0.00066999  | 0.008091041 |
| 1383576_at   | Transcribed locus                                                                                                  | ---                               | 1.9 | 0.000674911 | 0.008126605 |
| 1382493_at   | Transcribed locus, strongly similar to XP_223060.4 similar to centromere protein F (350/400kD) [Rattus norvegicus] | ---                               | 2.6 | 0.000678252 | 0.008160849 |
| 1391435_at   | phospholipid transfer protein (predicted)                                                                          | Pltp_predicted                    | 3.9 | 0.000687709 | 0.008238487 |
| 1382008_at   | similar to hypothetical protein FLJ11218                                                                           | RGD1309804                        | 2.5 | 0.0006917   | 0.008256224 |
| 1388555_at   | thioredoxin-like 5 (predicted)                                                                                     | Txn15_predicted                   | 1.4 | 0.000697215 | 0.00829197  |
| 1388169_at   | jumonji domain containing 1C                                                                                       | Jmjd1c                            | 2.1 | 0.000700206 | 0.008314928 |
| 1389422_at   | Transcribed locus                                                                                                  | ---                               | 1.6 | 0.000700662 | 0.008314928 |
| 1374518_at   | transmembrane protein 77                                                                                           | Tmem77                            | 1.4 | 0.000702183 | 0.008326963 |
| 1379598_at   | Transcribed locus                                                                                                  | ---                               | 1.7 | 0.000707541 | 0.008372402 |
| 1385430_at   | similar to LIM and senescent cell antigen-like domains 1 (predicted)                                               | RGD1560732_predicted ed           | 1.6 | 0.000709729 | 0.008386223 |
| 1385682_at   | similar to vitrin (predicted)                                                                                      | RGD1564128_predicted ed           | 2.9 | 0.000710865 | 0.008393615 |
| 1371695_at   | translocated promoter region                                                                                       | Tpr                               | 1.6 | 0.000711861 | 0.008399346 |
| 1398568_at   | Synaptosomal-associated protein, 91kDa homolog (mouse)                                                             | Snap91                            | 2.4 | 0.000713958 | 0.008418045 |
| 1392536_at   | Transcribed locus                                                                                                  | ---                               | 1.5 | 0.000715902 | 0.008428891 |
| 1374325_at   | Transcribed locus                                                                                                  | ---                               | 2.1 | 0.000717301 | 0.00843932  |
| 1372473_at   | tight junction protein 1 (predicted)                                                                               | Tjp1_predicted                    | 1.5 | 0.000722452 | 0.008475214 |
| 1382311_at   | TRAF2 binding protein                                                                                              | LOC310877                         | 1.9 | 0.000723184 | 0.008475214 |
| 1391412_at   | 5'-3' exoribonuclease 2 (predicted)                                                                                | Xrn2_predicted                    | 1.9 | 0.000723444 | 0.008475214 |
| 1388999_at   | Transcribed locus                                                                                                  | ---                               | 2.0 | 0.000735548 | 0.008586444 |
| 1389083_at   | similar to KIAA2010 protein (predicted)                                                                            | RGD1309450_predicted ed           | 1.6 | 0.000737732 | 0.00859581  |
| 1397844_at   | Rho GTPase activating protein 20                                                                                   | Arhgap20                          | 1.8 | 0.000738481 | 0.00859581  |
| 1382307_at   | protein phosphatase 1, regulatory (inhibitor) subunit 12A                                                          | Ppp1r12a                          | 2.3 | 0.000746259 | 0.008662292 |
| 1383519_at   | Hexokinase 2                                                                                                       | Hk2                               | 1.9 | 0.000749908 | 0.008698504 |
| 1388535_at   | similar to erythroid differentiation-related factor 1 (predicted)                                                  | RGD1306820_predicted ed           | 1.7 | 0.000752217 | 0.00871914  |
| 1377671_at   | Transcribed locus                                                                                                  | ---                               | 1.6 | 0.000757351 | 0.008760136 |
| 1371040_at   | solute carrier family 1 (neutral amino acid transporter), member 5                                                 | Slc1a5                            | 1.7 | 0.000762792 | 0.008812896 |
| 1383589_at   | ---                                                                                                                | ---                               | 2.2 | 0.000765061 | 0.008826747 |
| 1381980_at   | Torsin A interacting protein 2                                                                                     | Tor1aip2                          | 1.7 | 0.000765257 | 0.008826747 |
| 1374494_at   | Transcribed locus                                                                                                  | ---                               | 1.9 | 0.000770951 | 0.008873765 |
| 1383469_at   | Transcribed locus                                                                                                  | ---                               | 3.1 | 0.000772395 | 0.008884166 |
| 1375249_at   | eukaryotic translation initiation factor 2C, 1 (predicted)                                                         | Eif2c1_predicted                  | 2.1 | 0.000775497 | 0.008907387 |
| 1398761_at   | ribosomal protein L5                                                                                               | Rpl5                              | 1.6 | 0.00077933  | 0.008922897 |
| 1373092_at   | Transcribed locus                                                                                                  | ---                               | 1.6 | 0.000779691 | 0.008925406 |
| 1383226_at   | zinc finger protein X-linked (predicted)                                                                           | Zfx_predicted                     | 1.8 | 0.000784952 | 0.008972121 |
| 1395325_s_at | transmembrane protein 32 (predicted)                                                                               | Tmem32_predicted                  | 1.6 | 0.000785882 | 0.008976522 |
| 1379882_a_at | Transcribed locus                                                                                                  | ---                               | 2.6 | 0.000787731 | 0.00899139  |



|              |                                                                                                              |                                                        |     |             |             |
|--------------|--------------------------------------------------------------------------------------------------------------|--------------------------------------------------------|-----|-------------|-------------|
| 1382314_at   | interferon, alpha-inducible protein (clone IFI-15K) (predicted)                                              | G1p2_predicted                                         | 8.7 | 0.000792394 | 0.009025155 |
| 1372845_at   | ribonuclease P 21 subunit (human)                                                                            | Rpp21                                                  | 1.7 | 0.000796163 | 0.009039611 |
| 1375186_at   | similar to zinc finger, CSL domain containing 2                                                              | LOC680594 ///<br>LOC682119                             | 1.8 | 0.000796802 | 0.009039611 |
| 1368172_a_at | lysyl oxidase                                                                                                | Lox                                                    | 3.1 | 0.000796901 | 0.009039611 |
| 1385948_at   | Transcribed locus                                                                                            | ---                                                    | 1.6 | 0.000800293 | 0.00906034  |
| 1370186_at   | proteasome (prosome, macropain) subunit, beta type 9                                                         | Psmb9                                                  | 3.4 | 0.000804509 | 0.009094546 |
| 1377627_at   | similar to down-regulated in metastasis (predicted)                                                          | RGD1560606_predicted                                   | 1.9 | 0.000805873 | 0.009095741 |
| 1392717_at   | Kinesin family member 1B                                                                                     | Kif1b                                                  | 1.6 | 0.000806901 | 0.009096579 |
| 1383998_at   | similar to KIAA2010 protein (predicted)                                                                      | RGD1309450_predicted                                   | 1.6 | 0.000811328 | 0.009133964 |
| 1372604_at   | similar to apolipoprotein L2; apolipoprotein L-II (predicted) /// similar to apolipoprotein L, 3 (predicted) | LOC686810 ///<br>LOC688281 ///<br>RGD1309808_predicted | 2.5 | 0.000813534 | 0.009152539 |
| 1374108_at   | low density lipoprotein-related protein 12 (predicted)                                                       | Lrp12_predicted                                        | 1.5 | 0.0008144   | 0.009153576 |
| 1391551_at   | ---                                                                                                          | ---                                                    | 1.5 | 0.000814739 | 0.009153576 |
| 1383516_at   | fibrinogen-like 2                                                                                            | Fgl2                                                   | 2.2 | 0.000818064 | 0.009176249 |
| 1381228_at   | Transcribed locus                                                                                            | ---                                                    | 4.3 | 0.000818104 | 0.009176249 |
| 1367794_at   | alpha-2-macroglobulin                                                                                        | A2m                                                    | 2.6 | 0.000818954 | 0.009176249 |
| 1377353_a_at | tumor necrosis factor (ligand) superfamily, member 13                                                        | Tnfsf13                                                | 1.6 | 0.000820858 | 0.009184672 |
| 1398401_at   | tudor domain containing 3                                                                                    | Tdtd3                                                  | 1.8 | 0.000822875 | 0.009187546 |
| 1375559_at   | similar to thyroid receptor-interacting protein 6                                                            | LOC686323                                              | 1.5 | 0.000823395 | 0.009187546 |
| 1390051_at   | similar to mKIAA0774 protein (predicted)                                                                     | RGD1562533_predicted                                   | 1.9 | 0.000823753 | 0.009187546 |
| 1398448_at   | Transcribed locus                                                                                            | ---                                                    | 1.5 | 0.000831779 | 0.009237741 |
| 1367582_at   | ribosomal protein L29                                                                                        | Rpl29                                                  | 1.6 | 0.000837111 | 0.00928442  |
| 1368127_at   | neuraminidase 2                                                                                              | Neu2                                                   | 1.7 | 0.000838644 | 0.009295159 |
| 1393048_at   | Adrenergic receptor, alpha 2a                                                                                | Adra2a                                                 | 2.7 | 0.000841943 | 0.009312892 |
| 1382387_at   | Transmembrane protein 16A (predicted)                                                                        | Tmem16a_predicted                                      | 2.1 | 0.000842844 | 0.009316594 |
| 1383383_at   | Transcribed locus                                                                                            | ---                                                    | 2.1 | 0.000843473 | 0.009317287 |
| 1385804_x_at | WD repeat domain 36 (predicted)                                                                              | Wdr36_predicted                                        | 1.8 | 0.000844143 | 0.009318432 |
| 1367826_at   | nuclear factor, erythroid derived 2, like 2                                                                  | Nfe2l2                                                 | 1.5 | 0.000850419 | 0.009362576 |
| 1387294_at   | SH3-domain binding protein 5 (BTK-associated)                                                                | Sh3bp5                                                 | 1.8 | 0.000862822 | 0.009463654 |
| 1389091_at   | ubiquitin specific peptidase 3                                                                               | Usp3                                                   | 1.7 | 0.000863627 | 0.009463654 |
| 1377622_at   | hepatitis B virus x associated protein (predicted)                                                           | Hbxap_predicted                                        | 1.9 | 0.000865754 | 0.009480637 |
| 1374151_at   | Transmembrane 6 superfamily member 1 (predicted)                                                             | Tm6sf1_predicted                                       | 2.0 | 0.000866864 | 0.009486482 |
| 1387031_at   | endoplasmic reticulum protein 29                                                                             | Erp29                                                  | 1.5 | 0.000870861 | 0.009508976 |
| 1398432_at   | similar to Ankyrin repeat domain protein 28 (predicted)                                                      | RGD1559931_predicted                                   | 1.7 | 0.000870927 | 0.009508976 |
| 1384310_at   | Transcribed locus                                                                                            | ---                                                    | 2.1 | 0.000872211 | 0.009508976 |
| 1395413_at   | low density lipoprotein receptor-related protein 6 (predicted)                                               | Lrp6_predicted                                         | 1.6 | 0.000872388 | 0.009508976 |
| 1388762_at   | IQ motif containing GTPase activating protein 1 (predicted)                                                  | Iqgap1_predicted                                       | 2.1 | 0.000882657 | 0.009595865 |
| 1383176_at   | similar to C11orf17 protein (predicted)                                                                      | RGD1306959_predicted                                   | 1.9 | 0.000882694 | 0.009595865 |
| 1389254_at   | Glutamine and serine rich 1 (predicted)                                                                      | Qser1_predicted                                        | 1.8 | 0.000886088 | 0.009626406 |
| 1393322_at   | TAF15 RNA polymerase II, TATA box binding protein (TBP)-associated factor (predicted)                        | Taf15_predicted                                        | 1.7 | 0.00089038  | 0.009666648 |
| 1385006_at   | alpha thalassemia/mental retardation syndrome X-linked homolog (human)                                       | Atrx                                                   | 1.4 | 0.000895393 | 0.009708254 |
| 1382268_at   | A kinase (PRKA) anchor protein 13                                                                            | Akap13                                                 | 1.6 | 0.000898403 | 0.009728063 |
| 1367618_a_at | guanine nucleotide binding protein (G protein), beta polypeptide 2 like 1                                    | Gnb2l1                                                 | 1.5 | 0.000902335 | 0.009755149 |
| 1371412_a_at | Neuronal regeneration related protein                                                                        | Nrep                                                   | 1.5 | 0.000902683 | 0.009755149 |
| 1384124_at   | Transcribed locus                                                                                            | ---                                                    | 2.3 | 0.000903366 | 0.009756116 |
| 1390264_at   | similar to RIKEN cDNA 1200014J11 (predicted)                                                                 | RGD1308139_predicted                                   | 1.7 | 0.00090708  | 0.009777575 |

|              |                                                                                                                     |                                                                     |     |             |             |
|--------------|---------------------------------------------------------------------------------------------------------------------|---------------------------------------------------------------------|-----|-------------|-------------|
| 1390709_at   | triple functional domain (PTPRF interacting)                                                                        | Trio                                                                | 1.6 | 0.00091024  | 0.009804598 |
| 1378264_at   | Nuclear autoantigenic sperm protein (histone-binding)                                                               | Nasp                                                                | 1.7 | 0.000915264 | 0.009852268 |
| 1389293_at   | Transcribed locus                                                                                                   | ---                                                                 | 1.4 | 0.000920738 | 0.009904704 |
| 1368708_a_at | dopamine receptor 2                                                                                                 | Drd2                                                                | 1.9 | 0.000924024 | 0.009914126 |
| 1375362_at   | similar to RIKEN cDNA 2010106G01 (predicted)                                                                        | RGD1563001_predicted                                                | 1.5 | 0.000925603 | 0.009922602 |
| 1383051_at   | Synaptotagmin binding, cytoplasmic RNA interacting protein                                                          | Syncrip                                                             | 1.6 | 0.000926021 | 0.009922602 |
| 1396850_at   | ---                                                                                                                 | ---                                                                 | 2.3 | 0.000929226 | 0.009950458 |
| 1381014_at   | interferon-induced protein 44                                                                                       | Ifi44                                                               | 1.9 | 0.000930406 | 0.009956616 |
| 1372729_at   | protein C receptor, endothelial                                                                                     | Procr                                                               | 1.8 | 0.00093185  | 0.009965585 |
| 1372030_at   | zinc finger, FYVE domain containing 21 (predicted)                                                                  | Zfyve21_predicted                                                   | 1.5 | 0.00093718  | 0.01000634  |
| 1370201_at   | calbindin 1                                                                                                         | Calb1                                                               | 2.5 | 0.000938009 | 0.01000634  |
| 1382691_at   | ---                                                                                                                 | ---                                                                 | 2.0 | 0.000938094 | 0.01000634  |
| 1367685_at   | ribosomal protein S27a                                                                                              | Rps27a                                                              | 1.6 | 0.000939391 | 0.010013681 |
| 1370260_at   | adducin 3 (gamma)                                                                                                   | Add3                                                                | 1.5 | 0.000948318 | 0.010090655 |
| 1367776_at   | cell division cycle 2 homolog A (S. pombe)                                                                          | Cdc2a                                                               | 3.8 | 0.000953465 | 0.010130872 |
| 1388481_at   | ribosomal protein S28 /// similar to 40S ribosomal protein S28 (predicted) /// similar to 40S ribosomal protein S28 | LOC684733 ///<br>LOC691531 ///<br>RGD1564194_predicted ///<br>Rps28 | 1.7 | 0.000954269 | 0.010132871 |
| 1383603_at   | Transcribed locus                                                                                                   | ---                                                                 | 1.5 | 0.000963243 | 0.010205275 |
| 1371313_at   | ribosomal protein L23a                                                                                              | Rpl23a                                                              | 1.7 | 0.00096355  | 0.010205275 |
| 1370904_at   | major histocompatibility complex, class II, DM alpha                                                                | Hla-dma                                                             | 2.7 | 0.000964796 | 0.010210808 |
| 1398760_at   | ribosomal protein L35a                                                                                              | Rpl35a                                                              | 1.6 | 0.000965954 | 0.010210808 |
| 1368671_at   | sushi-repeat-containing protein                                                                                     | Srxp                                                                | 2.1 | 0.000968945 | 0.010229273 |
| 1383655_at   | TNFAIP3 interacting protein 2                                                                                       | Tnfp2                                                               | 2.0 | 0.000973011 | 0.010252455 |
| 1367934_at   | ribosomal protein L39                                                                                               | Rpl39                                                               | 1.7 | 0.000984398 | 0.010339318 |
| 1390460_at   | Transcribed locus                                                                                                   | ---                                                                 | 1.7 | 0.000989996 | 0.010384853 |
| 1391145_at   | Transcribed locus                                                                                                   | ---                                                                 | 1.5 | 0.000996164 | 0.010436248 |
| 1389836_a_at | Tissue inhibitor of metalloproteinase 3 (Sorsby fundus dystrophy, pseudo-inflammatory)                              | Timp3                                                               | 1.8 | 0.001003941 | 0.010499503 |
| 1367630_at   | ribosomal protein S11                                                                                               | Rps11                                                               | 1.5 | 0.001004117 | 0.010499503 |
| 1370195_at   | synaptosomal-associated protein 23                                                                                  | Snap23                                                              | 1.8 | 0.001005276 | 0.010504938 |
| 1370883_at   | RT1 class II, locus Da                                                                                              | RT1-Da                                                              | 4.8 | 0.00100697  | 0.010515968 |
| 1391613_at   | Similar to hypothetical protein DKFZp761N1114 (predicted)                                                           | RGD1566090_predicted                                                | 1.9 | 0.001015141 | 0.010587682 |
| 1373732_at   | acid phosphatase 6, lysophosphatidic                                                                                | Acp6                                                                | 1.5 | 0.001023737 | 0.010623617 |
| 1399018_at   | similar to cisplatin resistance-associated overexpressed protein (predicted)                                        | RGD1307981_predicted                                                | 1.5 | 0.001025999 | 0.010633664 |
| 1373250_at   | similar to Anillin (predicted)                                                                                      | RGD1566097_predicted                                                | 4.0 | 0.001028156 | 0.010633707 |
| 1370113_at   | baculoviral IAP repeat-containing 3                                                                                 | Birc3                                                               | 1.4 | 0.001028854 | 0.010633707 |
| 1381410_a_at | ---                                                                                                                 | ---                                                                 | 2.3 | 0.001029235 | 0.010633707 |
| 1397867_at   | ---                                                                                                                 | ---                                                                 | 1.7 | 0.001030857 | 0.01064378  |
| 1373357_at   | Transcribed locus                                                                                                   | ---                                                                 | 3.4 | 0.001034214 | 0.01067174  |
| 1372175_at   | Transcribed locus                                                                                                   | ---                                                                 | 1.6 | 0.001035724 | 0.010680618 |
| 1372417_at   | SERTA domain containing 1                                                                                           | Sertad1                                                             | 1.4 | 0.001038993 | 0.010701542 |
| 1371761_at   | ribosomal protein L34 (predicted) /// similar to ribosomal protein L34                                              | LOC680170 ///<br>LOC684829 ///<br>Rpl34_predicted                   | 1.5 | 0.001039054 | 0.010701542 |
| 1389611_at   | ---                                                                                                                 | ---                                                                 | 1.6 | 0.001039846 | 0.010702468 |
| 1372259_at   | DEK oncogene (DNA binding)                                                                                          | Dek                                                                 | 1.9 | 0.001040549 | 0.010702468 |
| 1383954_at   | Transcribed locus                                                                                                   | ---                                                                 | 1.8 | 0.001041336 | 0.010702468 |
| 1385380_at   | Transcribed locus                                                                                                   | ---                                                                 | 3.1 | 0.001044503 | 0.010704212 |
| 1389500_at   | similar to ras homolog gene family, member U                                                                        | LOC678766                                                           | 1.8 | 0.00104452  | 0.010704212 |
| 1372137_at   | biogenesis of lysosome-related organelles complex-1, subunit 1 (predicted)                                          | Bloc1s1_predicted                                                   | 1.4 | 0.001052286 | 0.010756992 |
| 1383520_at   | ---                                                                                                                 | ---                                                                 | 1.4 | 0.001057285 | 0.010789283 |

|              |                                                                                  |                      |     |             |             |
|--------------|----------------------------------------------------------------------------------|----------------------|-----|-------------|-------------|
| 1387343_at   | CCAAT/enhancer binding protein (C/EBP), delta                                    | Cebpd                | 2.2 | 0.00105894  | 0.010791478 |
| 1379694_at   | enhancer of polycomb homolog 2 (Drosophila) (predicted)                          | Epc2_predicted       | 2.0 | 0.001065705 | 0.010826474 |
| 1383062_at   | Glutaredoxin 2 (thioltransferase)                                                | Glrx2                | 1.5 | 0.001066361 | 0.010826474 |
| 1390177_at   | Transcribed locus                                                                | ---                  | 1.9 | 0.001066781 | 0.010826474 |
| 1372493_at   | coiled-coil domain containing 23                                                 | Ccdc23               | 1.6 | 0.001069115 | 0.010834755 |
| 1397767_at   | Transcribed locus                                                                | ---                  | 1.7 | 0.00107541  | 0.010871145 |
| 1383251_at   | poly (ADP-ribose) polymerase family, member 2 (predicted)                        | Parp2_predicted      | 1.6 | 0.001085923 | 0.010937702 |
| 1398888_at   | H3 histone, family 3B                                                            | H3f3b                | 1.5 | 0.001088344 | 0.010955379 |
| 1377999_at   | Transcribed locus                                                                | ---                  | 2.2 | 0.001092842 | 0.010993922 |
| 1376096_a_at | Transcribed locus                                                                | ---                  | 1.9 | 0.001095772 | 0.011003208 |
| 1379217_at   | Transcribed locus                                                                | ---                  | 1.5 | 0.001100578 | 0.011037375 |
| 1399025_at   | similar to mesoderm induction early response 1 (MI-ER1) (predicted)              | RGD1562337_predicted | 1.5 | 0.001104569 | 0.011057795 |
| 1388830_at   | protein kinase N2                                                                | Pkn2                 | 1.4 | 0.001106173 | 0.011067117 |
| 1370048_at   | endothelial differentiation, lysophosphatidic acid G-protein-coupled receptor, 2 | Edg2                 | 1.5 | 0.001110198 | 0.011100285 |
| 1373182_at   | ---                                                                              | ---                  | 1.6 | 0.001111513 | 0.011100285 |
| 1398353_at   | SAR1 gene homolog A (S. cerevisiae)                                              | Sar1a                | 1.5 | 0.001113111 | 0.011102756 |
| 1388557_at   | complement component 7 /// tubulin, beta 2c                                      | C7 /// Tubb2c        | 3.4 | 0.001117352 | 0.011138303 |
| 1385397_at   | Ab1-219                                                                          | LOC499991            | 3.1 | 0.001120018 | 0.011156156 |
| 1393596_at   | alpha thalassemia/mental retardation syndrome X-linked homolog (human)           | Atrx                 | 2.0 | 0.001125019 | 0.011194385 |
| 1395203_at   | Transcribed locus                                                                | ---                  | 1.9 | 0.001134432 | 0.01126759  |
| 1386984_at   | MAD homolog 4 (Drosophila)                                                       | Smad4                | 1.8 | 0.00114409  | 0.011356669 |
| 1368917_at   | nudix (nucleoside diphosphate linked moiety X)-type motif 1                      | Nudt1                | 1.4 | 0.001145256 | 0.011361381 |
| 1389528_s_at | Jun oncogene                                                                     | Jun                  | 2.8 | 0.001156075 | 0.011454889 |
| 1392502_at   | AT hook containing transcription factor 1 (predicted)                            | Ahctf1_predicted     | 1.7 | 0.001164056 | 0.011506249 |
| 1373776_at   | ---                                                                              | ---                  | 2.0 | 0.001167777 | 0.011529168 |
| 1381967_at   | RNA-binding region (RNP1, RRM) containing 2                                      | Rnpc2                | 1.4 | 0.00116895  | 0.011533823 |
| 1368841_at   | transcription factor 4                                                           | Tcf4                 | 1.4 | 0.001172119 | 0.011558163 |
| 1395060_at   | Inner membrane protein, mitochondrial                                            | Immt                 | 2.1 | 0.001176874 | 0.011578942 |
| 1383467_at   | enhancer of polycomb homolog 2 (Drosophila) (predicted)                          | Epc2_predicted       | 1.9 | 0.001177042 | 0.011578942 |
| 1393687_at   | Transcribed locus                                                                | ---                  | 1.7 | 0.001181012 | 0.011594924 |
| 1390019_at   | H3 histone, family 3B                                                            | H3f3b                | 1.7 | 0.001181487 | 0.011594924 |
| 1375637_at   | similar to RIKEN cDNA 1110003E01                                                 | RGD1311122           | 1.5 | 0.00119171  | 0.01167436  |
| 1392971_at   | Transcribed locus                                                                | ---                  | 1.9 | 0.00119691  | 0.01171135  |
| 1386945_a_at | protein kinase, AMP-activated, beta 1 non-catalytic subunit                      | Prkab1               | 1.6 | 0.001203131 | 0.011758231 |
| 1385751_at   | thrombospondin 2                                                                 | Thbs2                | 3.1 | 0.001206407 | 0.011769264 |
| 1371078_at   | RT1 class Ib, locus Aw2                                                          | RT1-Aw2              | 1.7 | 0.001208551 | 0.011778151 |
| 1369414_at   | syntaxin binding protein 3                                                       | Stxbp3               | 1.4 | 0.001210182 | 0.011778151 |
| 1367663_at   | proteasome (prosome, macropain) 28 subunit, alpha                                | Psme1                | 1.9 | 0.001211066 | 0.011779787 |
| 1395654_at   | Transcribed locus                                                                | ---                  | 2.0 | 0.001222606 | 0.011849986 |
| 1387890_at   | ribosomal protein S29                                                            | Rps29                | 1.4 | 0.001225384 | 0.011862932 |
| 1373937_at   | FYVE and coiled-coil domain containing 1 (predicted)                             | Fyco1_predicted      | 1.6 | 0.001226484 | 0.011866595 |
| 1392471_at   | Transcribed locus                                                                | ---                  | 1.5 | 0.001228589 | 0.011872927 |
| 1397673_at   | CUG triplet repeat, RNA binding protein 2                                        | Cugbp2               | 1.7 | 0.001229304 | 0.011872927 |
| 1379683_at   | Similar to hypothetical protein MGC17839 (predicted)                             | RGD1565079_predicted | 1.5 | 0.001235415 | 0.011898489 |
| 1381979_at   | sulfatase modifying factor 2                                                     | Sumf2                | 1.6 | 0.00124006  | 0.011932825 |
| 1372995_at   | protein kinase D2                                                                | Prkd2                | 1.5 | 0.001240584 | 0.011932825 |
| 1378645_at   | Transcribed locus                                                                | ---                  | 2.5 | 0.001249416 | 0.011996726 |
| 1388763_at   | similar to Calponin-2 (Calponin H2, smooth muscle) (Neutral calponin)            | LOC690976            | 1.5 | 0.001253493 | 0.012003577 |
| 1374134_at   | Transcribed locus                                                                | ---                  | 1.9 | 0.001253521 | 0.012003577 |
| 1371044_at   | phosphodiesterase 7A                                                             | Pde7a                | 1.6 | 0.001253778 | 0.012003577 |
| 1392888_at   | glypican 4                                                                       | Gpc4                 | 1.7 | 0.001261573 | 0.012056527 |

|              |                                                                                                                                     |                         |     |             |             |
|--------------|-------------------------------------------------------------------------------------------------------------------------------------|-------------------------|-----|-------------|-------------|
| 1381755_x_at | similar to RIKEN cDNA 4831426119 (predicted)                                                                                        | RGD1304563_predicted    | 2.0 | 0.001262241 | 0.012056527 |
| 1372097_at   | ---                                                                                                                                 | ---                     | 2.6 | 0.001266322 | 0.012081474 |
| 1374474_at   | copine VIII (predicted)                                                                                                             | Cpne8_predicted         | 1.5 | 0.001273134 | 0.012132396 |
| 1372811_at   | kinectin 1 (predicted)                                                                                                              | Ktn1_predicted          | 1.7 | 0.001275666 | 0.012149484 |
| 1374540_at   | cell division cycle associated 7                                                                                                    | Cdca7                   | 1.6 | 0.001284405 | 0.012218558 |
| 1389968_at   | eukaryotic translation initiation factor 3, subunit 10 (theta)                                                                      | Eif3s10                 | 1.6 | 0.00128756  | 0.012234423 |
| 1384792_at   | pre-mRNA processing factor 40 homolog A (yeast) (predicted)                                                                         | Prpf40a_predicted       | 1.6 | 0.001290319 | 0.012246487 |
| 1374463_at   | similar to quaking homolog, KH domain RNA binding isoform HQK-6 /// similar to quaking homolog, KH domain RNA binding isoform HQK-5 | LOC499022 /// LOC684079 | 1.6 | 0.001297999 | 0.012312273 |
| 1399046_at   | ---                                                                                                                                 | ---                     | 1.4 | 0.001304832 | 0.012362832 |
| 1373054_at   | CDW92 antigen                                                                                                                       | Cdw92                   | 1.8 | 0.001318551 | 0.012471266 |
| 1374232_at   | phosphatidylinositol 3-kinase, catalytic, alpha polypeptide                                                                         | Pik3ca                  | 1.9 | 0.001320747 | 0.012478539 |
| 1387342_at   | guanine nucleotide binding protein (G protein), gamma 5 subunit                                                                     | Gng5                    | 2.1 | 0.00132366  | 0.012478539 |
| 1371428_at   | similar to Protein transport protein SEC61 gamma subunit                                                                            | LOC681549 /// LOC689134 | 2.0 | 0.001326005 | 0.012491485 |
| 1380369_at   | Transcribed locus                                                                                                                   | ---                     | 1.5 | 0.001327827 | 0.012501488 |
| 1372466_at   | Transcribed locus                                                                                                                   | ---                     | 1.5 | 0.001333008 | 0.01253853  |
| 1367922_at   | a disintegrin and metalloproteinase domain 17 (tumor necrosis factor, alpha, converting enzyme)                                     | Adam17                  | 1.8 | 0.001333286 | 0.01253853  |
| 1379271_at   | similar to Suppressor of cytokine signaling 5 (predicted)                                                                           | RGD1564914_predicted    | 1.6 | 0.001339154 | 0.012579332 |
| 1389306_at   | ---                                                                                                                                 | ---                     | 1.8 | 0.001348758 | 0.012655093 |
| 1394419_at   | similar to RIKEN cDNA 6530401L14 gene                                                                                               | RGD1309107              | 1.8 | 0.001361154 | 0.012715638 |
| 1384795_at   | zinc finger, matrin-like (predicted)                                                                                                | Zfml_predicted          | 1.5 | 0.001361396 | 0.012715638 |
| 1396339_at   | Transcribed locus                                                                                                                   | ---                     | 1.5 | 0.001365151 | 0.012743471 |
| 1369174_at   | MAD homolog 1 (Drosophila)                                                                                                          | Smad1                   | 1.8 | 0.001367178 | 0.012748378 |
| 1376411_at   | similar to ADP-ribosylation factor-like 2-like 1                                                                                    | LOC304037               | 1.7 | 0.001368749 | 0.012748378 |
| 1397929_at   | Transcribed locus                                                                                                                   | ---                     | 2.7 | 0.001369863 | 0.012748378 |
| 1390386_at   | caspase 3, apoptosis related cysteine protease                                                                                      | Casp3                   | 2.4 | 0.001369944 | 0.012748378 |
| 1378586_at   | Cytokine inducible SH2-containing protein                                                                                           | Cish                    | 1.6 | 0.001372311 | 0.012748378 |
| 1384280_at   | Transcribed locus                                                                                                                   | ---                     | 2.7 | 0.001372652 | 0.012748378 |
| 1377130_at   | Transcribed locus                                                                                                                   | ---                     | 2.2 | 0.001374925 | 0.012762288 |
| 1382680_at   | ---                                                                                                                                 | ---                     | 1.5 | 0.001378533 | 0.012788558 |
| 1393252_at   | Transcribed locus                                                                                                                   | ---                     | 3.8 | 0.00138294  | 0.012821275 |
| 1376098_a_at | myosin IG                                                                                                                           | Myo1g                   | 1.9 | 0.001383619 | 0.012821275 |
| 1380449_at   | Transcribed locus                                                                                                                   | ---                     | 1.5 | 0.001387173 | 0.012826724 |
| 1383564_at   | interferon regulatory factor 7                                                                                                      | Irf7                    | 3.4 | 0.001387815 | 0.012826724 |
| 1367576_at   | glutathione peroxidase 1                                                                                                            | Gpx1                    | 1.4 | 0.001388106 | 0.012826724 |
| 1379344_at   | Cytochrome b-245, beta polypeptide                                                                                                  | Cybb                    | 5.4 | 0.001391455 | 0.012845219 |
| 1384200_at   | similar to RIKEN cDNA 4931400A14 (predicted)                                                                                        | RGD1307234_predicted    | 1.4 | 0.00139167  | 0.012845219 |
| 1399005_at   | protein phosphatase 2, regulatory subunit B (B56), alpha isoform (predicted)                                                        | Ppp2r5a_predicted       | 1.6 | 0.00139584  | 0.012876484 |
| 1372449_at   | Transcribed locus                                                                                                                   | ---                     | 1.4 | 0.001397802 | 0.012879943 |
| 1371033_at   | RT1 class II, locus Bb                                                                                                              | RT1-Bb                  | 6.9 | 0.001399155 | 0.012879943 |
| 1387131_at   | serine (or cysteine) peptidase inhibitor, clade I, member 1                                                                         | Serpini1                | 1.8 | 0.001399347 | 0.012879943 |
| 1369996_at   | polymerase (RNA) II (DNA directed) polypeptide F                                                                                    | Polr2f                  | 1.5 | 0.001407267 | 0.012923912 |
| 1374171_at   | Transcribed locus                                                                                                                   | ---                     | 2.6 | 0.001410665 | 0.012947889 |
| 1397719_at   | Transcribed locus                                                                                                                   | ---                     | 1.4 | 0.001417314 | 0.012975695 |
| 1375006_at   | CDNA clone IMAGE:7318427                                                                                                            | ---                     | 1.7 | 0.001419249 | 0.012975993 |
| 1394493_at   | Casein kinase 1, alpha 1                                                                                                            | Csnk1a1                 | 2.2 | 0.001423846 | 0.013003655 |
| 1388485_at   | chemokine (C-X-C motif) ligand 14                                                                                                   | Cxcl14                  | 5.1 | 0.001423856 | 0.013003655 |
| 1382923_at   | synaptotagmin binding, cytoplasmic RNA interacting protein                                                                          | Syncrip                 | 1.7 | 0.001426443 | 0.013020053 |

|              |                                                                                                                     |                                                  |      |             |             |
|--------------|---------------------------------------------------------------------------------------------------------------------|--------------------------------------------------|------|-------------|-------------|
| 1374404_at   | Jun oncogene                                                                                                        | Jun                                              | 2.4  | 0.00144241  | 0.013143911 |
| 1376629_at   | ---                                                                                                                 | ---                                              | 1.4  | 0.001445583 | 0.013158248 |
| 1373376_at   | Transcribed locus                                                                                                   | ---                                              | 1.4  | 0.001446572 | 0.013159961 |
| 1374337_at   | Transcribed locus                                                                                                   | ---                                              | 2.7  | 0.001449123 | 0.013168607 |
| 1371150_at   | cyclin D1                                                                                                           | Ccnd1                                            | 1.9  | 0.001455329 | 0.013186526 |
| 1398256_at   | interleukin 1 beta                                                                                                  | Il1b                                             | 1.9  | 0.001463576 | 0.013215173 |
| 1383240_at   | integrin, alpha 6                                                                                                   | Itga6                                            | 1.6  | 0.001463889 | 0.013215173 |
| 1377102_at   | transmembrane protein 63a (predicted)                                                                               | Tmem63a_predicted                                | 1.4  | 0.001466996 | 0.013235956 |
| 1390788_a_at | WD repeat domain 36 (predicted)                                                                                     | Wdr36_predicted                                  | 2.0  | 0.001470785 | 0.013255605 |
| 1383115_at   | Protein kinase, cGMP-dependent, type 1 (mapped)                                                                     | Prkg1                                            | 1.7  | 0.001472773 | 0.013266244 |
| 1387157_at   | polyamine modulated factor 1 binding protein 1                                                                      | Pmf1p1                                           | 1.5  | 0.001485127 | 0.013350227 |
| 1386899_at   | cathepsin H                                                                                                         | Ctsh                                             | 1.6  | 0.001485307 | 0.013350227 |
| 1368006_at   | lysosomal-associated protein transmembrane 5                                                                        | Laptm5                                           | 2.3  | 0.001486207 | 0.013350227 |
| 1392542_at   | similar to CDC42 small effector 2 (predicted) /// hypothetical protein LOC686503 /// hypothetical protein LOC691031 | LOC686503 /// LOC691031 /// RGD1563924_predicted | 1.5  | 0.001487812 | 0.013350227 |
| 1392489_at   | Transcribed locus                                                                                                   | ---                                              | 1.7  | 0.001489044 | 0.013350227 |
| 1376194_at   | Transcribed locus                                                                                                   | ---                                              | 1.6  | 0.001494806 | 0.013370578 |
| 1387995_a_at | interferon induced transmembrane protein 3                                                                          | Ifitm3                                           | 2.4  | 0.001494923 | 0.013370578 |
| 1367675_at   | calcium and integrin binding 1 (calmyrin)                                                                           | Cib1                                             | 1.4  | 0.001504151 | 0.013438502 |
| 1390189_at   | similar to zinc finger protein 277 isoform 1                                                                        | LOC298977                                        | 1.4  | 0.00150928  | 0.013476442 |
| 1387969_at   | chemokine (C-X-C motif) ligand 10                                                                                   | Cxcl10                                           | 7.5  | 0.001513096 | 0.013496422 |
| 1392660_at   | Transcribed locus                                                                                                   | ---                                              | 1.4  | 0.001522041 | 0.013561498 |
| 1388244_s_at | ribosomal protein SA                                                                                                | Rpsa                                             | 1.8  | 0.001523763 | 0.013562281 |
| 1376045_at   | Transcribed locus                                                                                                   | ---                                              | 1.6  | 0.001524602 | 0.013562281 |
| 1372463_at   | FCH domain only 2 (predicted)                                                                                       | Fcho2_predicted                                  | 1.9  | 0.001533724 | 0.013636053 |
| 1369160_a_at | solute carrier family 4, sodium bicarbonate cotransporter, member 7                                                 | Slc4a7                                           | 2.0  | 0.001545634 | 0.013727024 |
| 1368633_at   | cysteine-rich secretory protein 1                                                                                   | Crisp1                                           | 24.0 | 0.001547295 | 0.013727024 |
| 1397584_at   | Transcribed locus                                                                                                   | ---                                              | 1.8  | 0.001555081 | 0.013758992 |
| 1395010_at   | Transcribed locus                                                                                                   | ---                                              | 1.6  | 0.00156068  | 0.013793693 |
| 1376144_at   | poly (ADP-ribose) polymerase family, member 9 (predicted)                                                           | Parp9_predicted                                  | 2.4  | 0.001571657 | 0.0138758   |
| 1392838_at   | similar to CG13957-PA (predicted)                                                                                   | RGD1309995_predicted                             | 1.6  | 0.001573322 | 0.013883047 |
| 1393351_at   | Transcribed locus                                                                                                   | ---                                              | 2.6  | 0.001592687 | 0.013989624 |
| 1398917_at   | ribosomal protein L7                                                                                                | Rpl7                                             | 1.5  | 0.001593094 | 0.013989624 |
| 1384063_at   | collagen triple helix repeat containing 1                                                                           | Cthrc1                                           | 4.2  | 0.001593169 | 0.013989624 |
| 1398265_at   | ATP-binding cassette, sub-family C (CFTR/MRP), member 9                                                             | Abcc9                                            | 1.7  | 0.001593337 | 0.013989624 |
| 1383396_at   | fibronectin type III domain containing 3a (predicted)                                                               | Fndc3a_predicted                                 | 1.4  | 0.001594756 | 0.013989624 |
| 1370054_at   | cyclin-dependent kinase inhibitor 2C (p18, inhibits CDK4)                                                           | Cdkn2c                                           | 1.9  | 0.001600381 | 0.014024011 |
| 1382252_at   | Transcribed locus                                                                                                   | ---                                              | 1.9  | 0.001602937 | 0.014031712 |
| 1367588_a_at | ribosomal protein L13A                                                                                              | Rpl13a                                           | 1.5  | 0.001603819 | 0.014031712 |
| 1392669_at   | similar to CG10084-PA                                                                                               | RGD1308297                                       | 1.5  | 0.001623625 | 0.014162022 |
| 1368050_at   | cyclin L1                                                                                                           | Ccnl1                                            | 1.7  | 0.001637484 | 0.014257989 |
| 1373143_at   | similar to hypothetical protein FLJ10652                                                                            | RGD1309621                                       | 1.6  | 0.001639266 | 0.014265949 |
| 1375449_at   | Zinc finger homeobox 1b                                                                                             | Zfhx1b                                           | 2.0  | 0.001649276 | 0.014307647 |
| 1374063_at   | splicing factor, arginine/serine-rich 3 (SRp20) (predicted)                                                         | Sfrs3_predicted                                  | 1.4  | 0.001672163 | 0.014438933 |
| 1378831_at   | Similar to KIAA0456 protein (predicted)                                                                             | RGD1566016_predicted                             | 2.2  | 0.001676253 | 0.014465379 |
| 1368305_at   | caspase 6                                                                                                           | Casp6                                            | 1.7  | 0.001678012 | 0.01447296  |
| 1388710_at   | ras responsive element binding protein 1 (predicted)                                                                | Rreb1_predicted                                  | 2.1  | 0.001681419 | 0.014492598 |
| 1370907_at   | beta galactoside alpha 2,6 sialyltransferase 1                                                                      | St6gal1                                          | 1.5  | 0.001682506 | 0.014492598 |
| 1382568_at   | Transcribed locus                                                                                                   | ---                                              | 1.5  | 0.001684476 | 0.014492598 |
| 1368344_at   | glutamic acid decarboxylase 1                                                                                       | Gad1                                             | 2.1  | 0.00168498  | 0.014492598 |
| 1373847_at   | transmembrane 4 superfamily member 1 (predicted)                                                                    | Tm4sf1_predicted                                 | 1.8  | 0.001692553 | 0.014533875 |

|              |                                                                                                                               |                            |     |             |             |
|--------------|-------------------------------------------------------------------------------------------------------------------------------|----------------------------|-----|-------------|-------------|
| 1376848_at   | Transcribed locus                                                                                                             | ---                        | 2.5 | 0.001693027 | 0.014533875 |
| 1380690_at   | Transcribed locus, strongly similar to NP_075544.1 zipper- and sterile alpha motif-containing kinase isoform 1 [Mus musculus] | ---                        | 1.6 | 0.001695107 | 0.014544145 |
| 1399106_at   | similar to CG17059-PA                                                                                                         | LOC681389 ///<br>LOC684000 | 1.4 | 0.001696572 | 0.014549123 |
| 1374221_at   | Solute carrier family 29 (nucleoside transporters), member 3                                                                  | Slc29a3                    | 2.1 | 0.001699416 | 0.014558327 |
| 1376465_at   | Similar to glucocorticoid induced gene 1 (predicted)                                                                          | RGD1563869_predicted       | 2.0 | 0.00170314  | 0.014575053 |
| 1375857_at   | similar to Myoferlin (Fer-1 like protein 3) (predicted)                                                                       | RGD1564216_predicted       | 2.5 | 0.00170555  | 0.014588086 |
| 1397866_at   | serine (or cysteine) proteinase inhibitor, clade B, member 6b                                                                 | Serpnb6b                   | 1.6 | 0.001708922 | 0.014609332 |
| 1398764_at   | ribosomal protein L21                                                                                                         | Rpl21                      | 1.4 | 0.001711091 | 0.014614638 |
| 1385068_at   | Transcribed locus                                                                                                             | ---                        | 1.5 | 0.001714148 | 0.014631191 |
| 1387775_at   | general transcription factor IIa 2                                                                                            | Gtf2a2                     | 2.0 | 0.001716024 | 0.014639607 |
| 1391480_at   | Transcribed locus                                                                                                             | ---                        | 1.5 | 0.001717342 | 0.014643259 |
| 1371557_at   | THAP domain containing 4                                                                                                      | Thap4                      | 1.4 | 0.00172731  | 0.014713    |
| 1382489_at   | similar to WD repeat domain 11 protein (predicted)                                                                            | RGD1564964_predicted       | 2.6 | 0.001728704 | 0.014717252 |
| 1393585_at   | Transcribed locus                                                                                                             | ---                        | 1.5 | 0.001738342 | 0.014776356 |
| 1377299_at   | nuclear autoantigenic sperm protein (histone-binding)                                                                         | Nasp                       | 1.8 | 0.001741342 | 0.014780346 |
| 1389742_at   | Transcribed locus                                                                                                             | ---                        | 1.8 | 0.001741702 | 0.014780346 |
| 1396009_at   | ---                                                                                                                           | ---                        | 2.5 | 0.001743304 | 0.014780346 |
| 1383484_at   | male-specific lethal 2-like 1 (Drosophila) (predicted)                                                                        | Msl2l1_predicted           | 1.7 | 0.001744841 | 0.01478575  |
| 1368806_at   | selenoprotein P, plasma, 1                                                                                                    | Sepp1                      | 1.4 | 0.001748354 | 0.014807888 |
| 1384692_at   | ---                                                                                                                           | ---                        | 1.7 | 0.001758483 | 0.014878357 |
| 1379676_a_at | deoxyribonuclease 1-like 1                                                                                                    | Dnase1l1                   | 1.4 | 0.001764536 | 0.014921897 |
| 1398366_at   | Transcribed locus, moderately similar to XP_579763.1 hypothetical protein XP_579763 [Rattus norvegicus]                       | ---                        | 1.6 | 0.001770689 | 0.014958547 |
| 1377400_at   | HIV-1 Rev binding protein 2 (predicted)                                                                                       | Hrb2_predicted             | 1.4 | 0.001772575 | 0.014964264 |
| 1375538_at   | Vinculin (predicted)                                                                                                          | Vcl_predicted              | 2.3 | 0.001773185 | 0.014964264 |
| 1372668_at   | LIM domains containing 1 (predicted)                                                                                          | Limd1_predicted            | 1.8 | 0.001781494 | 0.015011275 |
| 1391830_at   | copine VIII (predicted)                                                                                                       | Cpne8_predicted            | 2.8 | 0.001790174 | 0.015058775 |
| 1373036_at   | similar to Ras GTPase-activating-like protein IQGAP2 (predicted)                                                              | RGD1561455_predicted       | 1.6 | 0.001790793 | 0.015058775 |
| 1393702_at   | 5'-3' exoribonuclease 2 (predicted)                                                                                           | Xrn2_predicted             | 1.4 | 0.001795881 | 0.015093841 |
| 1396053_at   | neural precursor cell expressed, developmentally down-regulated gene 9                                                        | Nedd9                      | 2.2 | 0.001801089 | 0.015120853 |
| 1387084_at   | dipeptidylpeptidase 4                                                                                                         | Dpp4                       | 2.0 | 0.001801657 | 0.015120853 |
| 1392484_at   | ---                                                                                                                           | ---                        | 1.5 | 0.001807764 | 0.015147273 |
| 1370449_at   | purinergic receptor P2Y, G-protein coupled, 14                                                                                | P2ry14                     | 2.0 | 0.001811296 | 0.015168972 |
| 1389840_at   | splicing factor 3b, subunit 1                                                                                                 | Sf3b1                      | 1.6 | 0.001812198 | 0.015168972 |
| 1389867_at   | Transcribed locus                                                                                                             | ---                        | 1.5 | 0.001818039 | 0.015210121 |
| 1383175_a_at | similar to C11orf17 protein (predicted)                                                                                       | RGD1306959_predicted       | 2.2 | 0.001824177 | 0.015245967 |
| 1395485_s_at | myosin Ib                                                                                                                     | Myo1b                      | 2.2 | 0.00182599  | 0.015250877 |
| 1385637_at   | Similar to sushi, von Willebrand factor type A, EGF and pentraxin domain containing 1                                         | LOC685899                  | 1.7 | 0.001827404 | 0.015250877 |
| 1393029_at   | CUG triplet repeat, RNA binding protein 1                                                                                     | Cugbp1                     | 1.7 | 0.00182764  | 0.015250877 |
| 1383889_at   | Transcribed locus                                                                                                             | ---                        | 1.6 | 0.001828957 | 0.015250877 |
| 1389397_at   | Transcribed locus                                                                                                             | ---                        | 1.7 | 0.001829401 | 0.015250877 |
| 1388212_a_at | RT1 class Ib, locus S3                                                                                                        | RT1-S3                     | 2.8 | 0.001845306 | 0.015360119 |
| 1380336_at   | Transcribed locus                                                                                                             | ---                        | 2.6 | 0.001856495 | 0.015429828 |
| 1375358_at   | Transcribed locus                                                                                                             | ---                        | 1.8 | 0.001859962 | 0.015443038 |
| 1393159_at   | Glutaredoxin 2 (thioltransferase)                                                                                             | Glrx2                      | 1.4 | 0.001867329 | 0.015496383 |
| 1399004_at   | similar to CG6878-PA                                                                                                          | LOC679572 ///<br>LOC683563 | 1.8 | 0.001872184 | 0.015513191 |
| 1374448_at   | reversion-inducing-cysteine-rich protein with kazal motifs (predicted)                                                        | Reck_predicted             | 1.4 | 0.001876819 | 0.015528128 |
| 1390945_at   | zinc finger protein 292                                                                                                       | Znf292                     | 1.7 | 0.001878162 | 0.015528563 |

|              |                                                                                                                                                                                                |                            |     |             |             |
|--------------|------------------------------------------------------------------------------------------------------------------------------------------------------------------------------------------------|----------------------------|-----|-------------|-------------|
| 1371824_at   | adenylate kinase 3-like 1                                                                                                                                                                      | Ak31                       | 1.6 | 0.00187876  | 0.015528563 |
| 1371924_at   | olfactomedin-like 3 (predicted)                                                                                                                                                                | Olfml3_predicted           | 1.9 | 0.001887598 | 0.015593777 |
| 1376578_at   | euchromatic histone methyltransferase 1 (predicted)                                                                                                                                            | Ehmt1_predicted            | 1.8 | 0.001895463 | 0.015643039 |
| 1396305_at   | Transcribed locus                                                                                                                                                                              | ---                        | 1.9 | 0.001913991 | 0.015772205 |
| 1385346_at   | WW domain binding protein 4                                                                                                                                                                    | Wbp4                       | 1.9 | 0.001916816 | 0.015787579 |
| 1389130_at   | E74-like factor 2                                                                                                                                                                              | Elf2                       | 1.8 | 0.001920473 | 0.015809779 |
| 1371659_at   | ras homolog gene family, member C (predicted)                                                                                                                                                  | Rhoc_predicted             | 2.3 | 0.001928346 | 0.015858716 |
| 1371544_at   | similar to Enhancer of rudimentary homolog                                                                                                                                                     | LOC678886 ///<br>LOC681415 | 1.4 | 0.001935673 | 0.015911017 |
| 1396529_at   | Transcribed locus                                                                                                                                                                              | ---                        | 2.1 | 0.001940072 | 0.015932299 |
| 1378543_at   | heterogeneous nuclear ribonucleoprotein A2/B1 (predicted)                                                                                                                                      | Hnrpa2b1_predicted         | 1.5 | 0.001943189 | 0.015932991 |
| 1393210_at   | ---                                                                                                                                                                                            | ---                        | 2.9 | 0.001949368 | 0.015967731 |
| 1380071_at   | poly (ADP-ribose) polymerase family, member 12 (predicted)                                                                                                                                     | Parp12_predicted           | 3.2 | 0.001951481 | 0.015970267 |
| 1388772_at   | LSM8 homolog, U6 small nuclear RNA associated (S. cerevisiae) (predicted)                                                                                                                      | Lsm8_predicted             | 1.8 | 0.001952761 | 0.015971392 |
| 1377833_at   | similar to Rap1-interacting factor 1 (predicted)                                                                                                                                               | RGD1562474_predicted       | 1.9 | 0.001953699 | 0.015971392 |
| 1383940_at   | cell division cycle associated 1                                                                                                                                                               | Cdca1                      | 2.3 | 0.001963441 | 0.016014877 |
| 1382482_at   | Transcribed locus                                                                                                                                                                              | ---                        | 1.9 | 0.001963887 | 0.016014877 |
| 1375957_at   | Transcribed locus                                                                                                                                                                              | ---                        | 1.7 | 0.001967287 | 0.016026718 |
| 1388143_at   | procollagen, type XVIII, alpha 1                                                                                                                                                               | Col18a1                    | 1.6 | 0.001986441 | 0.016142781 |
| 1385585_at   | Transcribed locus                                                                                                                                                                              | ---                        | 2.1 | 0.001988488 | 0.016143461 |
| 1368303_at   | period homolog 2 (Drosophila)                                                                                                                                                                  | Per2                       | 2.6 | 0.002000994 | 0.016220971 |
| 1384292_at   | docking protein 1                                                                                                                                                                              | Dok1                       | 2.1 | 0.002012471 | 0.016273904 |
| 1371928_at   | cell division cycle associated 8                                                                                                                                                               | Cdca8                      | 1.4 | 0.002019056 | 0.016303109 |
| 1398246_s_at | Fc receptor, IgG, low affinity III                                                                                                                                                             | Fcgr3                      | 2.9 | 0.002024905 | 0.016342318 |
| 1370422_at   | receptor-interacting serine-threonine kinase 3                                                                                                                                                 | Ripk3                      | 1.7 | 0.00202938  | 0.016354373 |
| 1388054_a_at | chondroitin sulfate proteoglycan 2                                                                                                                                                             | Cspg2                      | 2.1 | 0.002029382 | 0.016354373 |
| 1385533_at   | Transcribed locus                                                                                                                                                                              | ---                        | 1.4 | 0.002030772 | 0.016357563 |
| 1385227_at   | trichorhinophalangeal syndrome I (predicted)                                                                                                                                                   | Trps1_predicted            | 1.8 | 0.00204404  | 0.016443272 |
| 1392938_s_at | similar to C11orf17 protein (predicted)                                                                                                                                                        | RGD1306959_predicted       | 2.1 | 0.002045412 | 0.016443272 |
| 1377103_at   | midnolin (predicted)                                                                                                                                                                           | Midn_predicted             | 1.6 | 0.002048769 | 0.016458219 |
| 1390229_at   | Transcribed locus                                                                                                                                                                              | ---                        | 1.6 | 0.002052251 | 0.016466059 |
| 1373405_at   | CDNA clone IMAGE:7373898                                                                                                                                                                       | ---                        | 1.4 | 0.002075045 | 0.01663272  |
| 1390034_at   | Transcribed locus                                                                                                                                                                              | ---                        | 1.5 | 0.002079299 | 0.01665059  |
| 1383712_at   | ---                                                                                                                                                                                            | ---                        | 1.6 | 0.002094657 | 0.016753818 |
| 1379260_at   | Transcribed locus                                                                                                                                                                              | ---                        | 1.4 | 0.002105041 | 0.016802032 |
| 1388932_at   | laminin, alpha 5                                                                                                                                                                               | Lama5                      | 1.8 | 0.002105362 | 0.016802032 |
| 1373432_at   | similar to Myristoylated alanine-rich C-kinase substrate (MARCKS) (ACAMP-81) /// similar to Myristoylated alanine-rich C-kinase substrate (MARCKS) (Protein kinase C substrate 80 kDa protein) | LOC294446 ///<br>LOC681252 | 2.3 | 0.002116796 | 0.016876907 |
| 1373217_at   | EH domain binding protein 1 (predicted)                                                                                                                                                        | Ehbp1_predicted            | 1.4 | 0.002118376 | 0.016881321 |
| 1392249_at   | Similar to protein 4.1G (predicted)                                                                                                                                                            | RGD1563977_predicted       | 1.8 | 0.002120652 | 0.016883939 |
| 1392118_at   | Transcribed locus                                                                                                                                                                              | ---                        | 2.4 | 0.002126749 | 0.016915265 |
| 1397630_at   | similar to HECT, C2 and WW domain containing E3 ubiquitin protein ligase 2 isoform 1                                                                                                           | LOC316395                  | 1.8 | 0.002128951 | 0.016917156 |
| 1373534_at   | similar to SR rich protein                                                                                                                                                                     | RGD1307395                 | 1.7 | 0.002131071 | 0.016917156 |
| 1389287_at   | CDNA clone IMAGE:7193711                                                                                                                                                                       | ---                        | 2.1 | 0.002136173 | 0.016932901 |
| 1388488_at   | LSM3 homolog, U6 small nuclear RNA associated (S. cerevisiae) (predicted)                                                                                                                      | Lsm3_predicted             | 1.6 | 0.002143652 | 0.016984002 |
| 1370963_at   | growth arrest specific 7                                                                                                                                                                       | Gas7                       | 2.1 | 0.002150001 | 0.017017906 |
| 1383284_at   | Transcribed locus                                                                                                                                                                              | ---                        | 2.2 | 0.002153807 | 0.017039834 |
| 1374780_at   | Transcribed locus                                                                                                                                                                              | ---                        | 2.1 | 0.002165935 | 0.017111097 |
| 1370235_at   | diazepam binding inhibitor                                                                                                                                                                     | Dbi                        | 1.4 | 0.002176853 | 0.0171726   |
| 1372758_at   | Transcribed locus                                                                                                                                                                              | ---                        | 1.7 | 0.00217922  | 0.017183037 |
| 1380425_at   | Ribonuclease L (2',5'-oligoadenylate synthetase-dependent)                                                                                                                                     | Rnasel                     | 2.0 | 0.002186469 | 0.01722368  |

|              |                                                                                  |                            |     |             |             |
|--------------|----------------------------------------------------------------------------------|----------------------------|-----|-------------|-------------|
| 1370895_at   | procollagen, type V, alpha 2                                                     | Col5a2                     | 2.3 | 0.002211985 | 0.017341621 |
| 1382189_at   | syndecan 2                                                                       | Sdc2                       | 1.6 | 0.002214754 | 0.017355061 |
| 1392770_at   | neogenin                                                                         | Neo1                       | 1.4 | 0.002216905 | 0.01735549  |
| 1383661_at   | Heparan sulfate (glucosamine) 3-O-sulfotransferase 3B1 (predicted)               | Hs3st3b1_predicted         | 1.8 | 0.002227029 | 0.017393241 |
| 1392385_at   | nuclear receptor coactivator 3                                                   | Ncoa3                      | 1.8 | 0.002228677 | 0.017397503 |
| 1387024_at   | dual specificity phosphatase 6                                                   | Dusp6                      | 1.7 | 0.002231173 | 0.017397503 |
| 1373176_at   | Transcribed locus                                                                | ---                        | 1.4 | 0.00223173  | 0.017397503 |
| 1376057_at   | ---                                                                              | ---                        | 1.7 | 0.002233904 | 0.017397503 |
| 1368842_at   | transcription factor 4                                                           | Tcf4                       | 2.1 | 0.002242049 | 0.017434087 |
| 1375723_at   | Transcribed locus                                                                | ---                        | 1.9 | 0.002250546 | 0.017477325 |
| 1388943_at   | chromatin accessibility complex 1 (predicted)                                    | Chrac1_predicted           | 1.3 | 0.002251856 | 0.017479249 |
| 1374976_a_at | Sterol O-acyltransferase 1                                                       | Soat1                      | 2.2 | 0.00225919  | 0.017500096 |
| 1373447_at   | similar to HN1-like protein                                                      | RGD1305117                 | 1.5 | 0.002267504 | 0.017542697 |
| 1388459_at   | procollagen, type XVIII, alpha 1                                                 | Col18a1                    | 2.3 | 0.002268563 | 0.017542697 |
| 1380265_at   | small nuclear RNA activating complex, polypeptide 1 (predicted)                  | Snapc1_predicted           | 2.0 | 0.00227713  | 0.017600676 |
| 1376711_at   | claudin 11                                                                       | Cldn11                     | 3.4 | 0.002302227 | 0.01773631  |
| 1367969_at   | peroxiredoxin 6                                                                  | Prdx6                      | 1.6 | 0.002310789 | 0.017768985 |
| 1371944_at   | ubiquitin-conjugating enzyme E2L 3 (predicted)                                   | Ube2l3_predicted           | 1.8 | 0.002315147 | 0.017777589 |
| 1372352_at   | arginine-rich, mutated in early stage tumors (predicted)                         | Armet_predicted            | 1.5 | 0.002318434 | 0.017794498 |
| 1372004_at   | heme binding protein 1 (predicted)                                               | Hebp1_predicted            | 1.8 | 0.00232282  | 0.017796757 |
| 1391608_at   | similar to Parn protein (predicted)                                              | RGD1565449_predicted       | 1.4 | 0.002323057 | 0.017796757 |
| 1398464_at   | Transcribed locus                                                                | ---                        | 1.8 | 0.002324851 | 0.01780221  |
| 1376200_at   | hypothetical LOC316976                                                           | MGC72974                   | 1.5 | 0.002333135 | 0.017844708 |
| 1386868_at   | ribosomal protein S10                                                            | Rps10                      | 1.4 | 0.002335907 | 0.017845331 |
| 1375849_at   | RGM domain family, member A (predicted)                                          | Rgma_predicted             | 1.7 | 0.002338275 | 0.017855131 |
| 1383601_at   | Transcribed locus                                                                | ---                        | 1.8 | 0.002346752 | 0.017905352 |
| 1372333_at   | similar to small nuclear ribonucleoprotein E                                     | LOC685587 ///<br>LOC687315 | 1.4 | 0.002347793 | 0.017905352 |
| 1376621_at   | similar to myocardial ischemic preconditioning upregulated protein 2 (predicted) | RGD1565589_predicted       | 1.8 | 0.002350724 | 0.017916915 |
| 1378633_at   | leupaxin                                                                         | Lpxn                       | 1.6 | 0.00235297  | 0.017917431 |
| 1383578_at   | Transcribed locus                                                                | ---                        | 2.0 | 0.002360484 | 0.017957526 |
| 1376627_at   | Transcribed locus                                                                | ---                        | 1.8 | 0.002361511 | 0.017957526 |
| 1386102_at   | ---                                                                              | ---                        | 1.6 | 0.002379222 | 0.018067148 |
| 1380544_at   | Transcribed locus                                                                | ---                        | 2.5 | 0.002401566 | 0.018216879 |
| 1391067_at   | ---                                                                              | ---                        | 2.4 | 0.002405478 | 0.018232857 |
| 1390532_at   | Transcribed locus                                                                | ---                        | 1.9 | 0.002409748 | 0.01825681  |
| 1391003_at   | similar to chromosome 10 open reading frame 6 (predicted)                        | RGD1560300_predicted       | 1.7 | 0.002426583 | 0.018352467 |
| 1398919_at   | similar to Hypothetical protein CGI-99                                           | RGD1304704                 | 1.6 | 0.002426837 | 0.018352467 |
| 1374838_at   | SP140 nuclear body protein                                                       | Sp140                      | 1.5 | 0.002437269 | 0.018414426 |
| 1382630_at   | Similar to 4930506M07Rik protein (predicted)                                     | RGD1311558_predicted       | 2.2 | 0.002451416 | 0.018504306 |
| 1383476_at   | Inter-alpha trypsin inhibitor, heavy chain 3                                     | Itih3                      | 1.9 | 0.002459876 | 0.01855114  |
| 1382081_at   | Transcribed locus                                                                | ---                        | 1.7 | 0.002466976 | 0.018596158 |
| 1389474_at   | Myosin regulatory light chain interacting protein (predicted)                    | Myliip_predicted           | 2.0 | 0.00248603  | 0.018714059 |
| 1392569_at   | Insulin-like growth factor 1                                                     | Igf1                       | 1.9 | 0.00248999  | 0.018727628 |
| 1371515_at   | similar to elongation factor 1 homolog (ELF1, S. cerevisiae)                     | LOC686668 ///<br>LOC691193 | 1.3 | 0.00249011  | 0.018727628 |
| 1389756_at   | maternal embryonic leucine zipper kinase (predicted)                             | Melk_predicted             | 2.1 | 0.002501179 | 0.018782553 |
| 1379669_at   | ---                                                                              | ---                        | 1.4 | 0.002501217 | 0.018782553 |
| 1398885_at   | ribosomal protein L23                                                            | Rpl23                      | 1.4 | 0.002505675 | 0.018801709 |
| 1390846_at   | procollagen, type XVI, alpha 1                                                   | Col16a1                    | 1.9 | 0.00250993  | 0.018816466 |
| 1372254_at   | serine (or cysteine) peptidase inhibitor, clade G, member 1                      | Serping1                   | 2.9 | 0.002531925 | 0.018946813 |
| 1393730_at   | Transcribed locus                                                                | ---                        | 1.9 | 0.002540312 | 0.018979133 |
| 1373475_at   | coiled-coil domain containing 58 (predicted)                                     | Ccdc58_predicted           | 1.6 | 0.002540543 | 0.018979133 |



|              |                                                                                        |                      |     |             |             |
|--------------|----------------------------------------------------------------------------------------|----------------------|-----|-------------|-------------|
| 1382847_at   | ash1 (absent, small, or homeotic)-like (Drosophila) (predicted)                        | Ash1l_predicted      | 1.4 | 0.002541444 | 0.018979133 |
| 1368418_a_at | ceruloplasmin                                                                          | Cp                   | 2.3 | 0.002550556 | 0.019034277 |
| 1374247_at   | ---                                                                                    | ---                  | 2.2 | 0.002554499 | 0.019055059 |
| 1372843_at   | LOC363020 (predicted)                                                                  | RGD1309410_predicted | 1.6 | 0.002564439 | 0.019115667 |
| 1387930_at   | regenerating islet-derived 3 alpha                                                     | Reg3a                | 2.2 | 0.002564949 | 0.019115667 |
| 1384391_at   | retinol dehydrogenase 10 (all-trans)                                                   | Rdh10                | 3.3 | 0.002566738 | 0.019120337 |
| 1371969_at   | Transcribed locus                                                                      | ---                  | 1.4 | 0.002572196 | 0.01915232  |
| 1374487_at   | similar to RIKEN cDNA 5730536A07                                                       | RGD1307481           | 1.5 | 0.002581578 | 0.019198918 |
| 1376920_at   | similar to sterile alpha motif domain containing 9-like                                | LOC500013            | 1.9 | 0.002582356 | 0.019198918 |
| 1374016_at   | endothelial differentiation, lysophosphatidic acid G-protein-coupled receptor, 2       | Edg2                 | 1.6 | 0.002583091 | 0.019198918 |
| 1374751_at   | ---                                                                                    | ---                  | 1.4 | 0.00258429  | 0.019198918 |
| 1381099_at   | V-raf murine sarcoma 3611 viral oncogene homolog                                       | Araf                 | 1.9 | 0.002587469 | 0.019213857 |
| 1375056_at   | ---                                                                                    | ---                  | 1.5 | 0.002588638 | 0.01921386  |
| 1368681_at   | parathyroid hormone-like peptide                                                       | Pthlh                | 1.6 | 0.002590896 | 0.019221947 |
| 1392425_x_at | LUC7-like (S. cerevisiae)                                                              | Luc7l                | 1.4 | 0.002594811 | 0.019231443 |
| 1368221_at   | nuclear receptor subfamily 3, group C, member 1                                        | Nr3c1                | 1.5 | 0.002601521 | 0.019266017 |
| 1382255_at   | ---                                                                                    | ---                  | 1.3 | 0.002619217 | 0.019362192 |
| 1377029_at   | RAR-related orphan receptor alpha (predicted)                                          | Rora_predicted       | 1.5 | 0.002621591 | 0.019371041 |
| 1398387_at   | hypothetical LOC310540                                                                 | MGC72614             | 2.3 | 0.002646451 | 0.019519651 |
| 1379638_at   | Transcribed locus                                                                      | ---                  | 2.1 | 0.00265528  | 0.019544829 |
| 1379245_at   | Thioredoxin domain containing 9                                                        | Txndc9               | 1.7 | 0.002657097 | 0.019544829 |
| 1385252_at   | tripartite motif protein 34 (predicted)                                                | Trim34_predicted     | 2.1 | 0.002668582 | 0.019569344 |
| 1385849_at   | Transcribed locus                                                                      | ---                  | 1.6 | 0.002669912 | 0.019569836 |
| 1392894_at   | fibrinogen-like 2                                                                      | Fgl2                 | 1.5 | 0.002675727 | 0.019594998 |
| 1377345_at   | Bobby sox homolog (Drosophila) (predicted)                                             | Bbx_predicted        | 1.5 | 0.002680692 | 0.01962262  |
| 1390021_at   | histone cluster 1, H2bh                                                                | Hist1h2bh            | 1.5 | 0.002685969 | 0.019635032 |
| 1376947_at   | retinoblastoma binding protein 6                                                       | Rbbp6                | 1.9 | 0.002694952 | 0.019674463 |
| 1385291_a_at | ---                                                                                    | ---                  | 3.3 | 0.002699964 | 0.019702312 |
| 1388420_at   | similar to topoisomerase (DNA) II beta                                                 | LOC361100            | 1.6 | 0.002704554 | 0.019727056 |
| 1382633_at   | Transcribed locus                                                                      | ---                  | 2.2 | 0.002726531 | 0.019808298 |
| 1377212_at   | Similar to Serologically defined colon cancer antigen 13 (predicted)                   | RGD1564816_predicted | 2.1 | 0.002731299 | 0.019816675 |
| 1377380_at   | ---                                                                                    | ---                  | 1.4 | 0.00273391  | 0.019826877 |
| 1383001_at   | RGD1560812 (predicted)                                                                 | RGD1560812_predicted | 1.7 | 0.002738213 | 0.019849329 |
| 1371875_at   | mannosidase, beta A, lysosomal                                                         | Manba                | 1.5 | 0.002743991 | 0.019875482 |
| 1383129_at   | CG6210-like                                                                            | LOC362065            | 1.6 | 0.002745169 | 0.019875482 |
| 1372062_at   | similar to cyclin-dependent kinase 2-interacting protein (predicted)                   | RGD1563395_predicted | 1.5 | 0.002750704 | 0.019896035 |
| 1390382_at   | similar to RIKEN cDNA 2310003F16 (predicted)                                           | RGD1311457_predicted | 1.9 | 0.002754405 | 0.019914047 |
| 1384815_at   | Protein phosphatase 3, catalytic subunit, alpha isoform                                | Ppp3ca               | 2.0 | 0.002761835 | 0.019955885 |
| 1381838_at   | Transcribed locus                                                                      | ---                  | 1.5 | 0.002766488 | 0.019975062 |
| 1398553_at   | transmembrane emp24 protein transport domain containing 5                              | Tmed5                | 2.5 | 0.002772344 | 0.019980855 |
| 1371477_at   | Transcribed locus                                                                      | ---                  | 1.4 | 0.0027727   | 0.019980855 |
| 1397335_at   | sema domain, immunoglobulin domain (Ig), short basic domain, secreted, (semaphorin) 3D | Sema3d               | 2.1 | 0.002773283 | 0.019980855 |
| 1388805_at   | Protein phosphatase 2 (formerly 2A), catalytic subunit, alpha isoform                  | Ppp2ca               | 1.6 | 0.002776773 | 0.019996654 |
| 1384407_at   | similar to RIKEN cDNA 1110025F24 (predicted)                                           | RGD1311451_predicted | 1.3 | 0.002784708 | 0.020014078 |
| 1377597_at   | AT rich interactive domain 2 (Arid-rfx like) (predicted)                               | Arid2_predicted      | 1.5 | 0.002785276 | 0.020014078 |
| 1396532_at   | Transcribed locus                                                                      | ---                  | 1.6 | 0.002788404 | 0.020023475 |
| 1385660_at   | similar to KIAA2010 protein (predicted)                                                | RGD1309059_predicted | 1.6 | 0.002790188 | 0.020023475 |
| 1368105_at   | tetraspanin 2                                                                          | Tspan2               | 1.5 | 0.002790334 | 0.020023475 |

|              |                                                                                                                                                             |                            |     |             |             |
|--------------|-------------------------------------------------------------------------------------------------------------------------------------------------------------|----------------------------|-----|-------------|-------------|
| 1385472_at   | Transcribed locus                                                                                                                                           | ---                        | 1.8 | 0.002791969 | 0.020023475 |
| 1388709_at   | similar to WD-repeat protein 43                                                                                                                             | LOC362703                  | 1.3 | 0.002798516 | 0.02005664  |
| 1376839_at   | Transcribed locus                                                                                                                                           | ---                        | 1.5 | 0.002803497 | 0.020074842 |
| 1398258_at   | apolipoprotein D                                                                                                                                            | Apod                       | 3.2 | 0.002816038 | 0.02015587  |
| 1383632_at   | Transcribed locus                                                                                                                                           | ---                        | 2.1 | 0.002831269 | 0.020256073 |
| 1392504_at   | similar to RIKEN cDNA 1600012F09 (predicted)                                                                                                                | RGD1306613_predicted       | 1.5 | 0.002838922 | 0.020301997 |
| 1389510_at   | Ly1 antibody reactive clone                                                                                                                                 | Lyar                       | 1.6 | 0.002846791 | 0.02034655  |
| 1383953_at   | excision repair cross-complementing rodent repair deficiency, complementation group 5                                                                       | Ercc5                      | 2.0 | 0.002847626 | 0.02034655  |
| 1376201_at   | similar to Hypothetical UPF0049 protein ZK1128.2 in chromosome III                                                                                          | LOC360568                  | 1.4 | 0.002875744 | 0.020485162 |
| 1373408_at   | tubulin cofactor a                                                                                                                                          | Tbca                       | 1.6 | 0.002891525 | 0.020570847 |
| 1377653_at   | similar to mKIAA1011 protein                                                                                                                                | LOC366669                  | 2.2 | 0.002896643 | 0.020585101 |
| 1370340_x_at | tropomyosin 3, gamma                                                                                                                                        | Tpm3                       | 1.5 | 0.002896648 | 0.020585101 |
| 1379390_at   | ST6 (alpha-N-acetyl-neuraminy-2,3-beta-galactosyl-1,3)-N-acetylglucosaminidase alpha-2,6-sialyltransferase 2                                                | St6galnac2                 | 1.9 | 0.002897283 | 0.020585101 |
| 1376634_a_at | similar to Protein C12orf11 (Sarcoma antigen NY-SAR-95)                                                                                                     | LOC686480 ///<br>LOC690728 | 1.6 | 0.002900425 | 0.020598526 |
| 1379404_at   | Transcribed locus                                                                                                                                           | ---                        | 2.6 | 0.002915068 | 0.020666823 |
| 1378202_at   | Transcribed locus                                                                                                                                           | ---                        | 1.7 | 0.002951593 | 0.020880778 |
| 1382903_at   | similar to zinc finger, ZZ domain containing 3                                                                                                              | LOC310958                  | 1.4 | 0.002964356 | 0.020960609 |
| 1372314_at   | Transcribed locus                                                                                                                                           | ---                        | 1.4 | 0.002965427 | 0.020960609 |
| 1388353_at   | proliferation-associated 2G4                                                                                                                                | Pa2g4                      | 1.7 | 0.002969325 | 0.020979145 |
| 1373950_at   | zinc finger protein 496 (predicted)                                                                                                                         | Zfp496_predicted           | 1.7 | 0.002976223 | 0.021018858 |
| 1377827_at   | serum response factor binding protein 1                                                                                                                     | Srfbp1                     | 1.3 | 0.002993203 | 0.021129699 |
| 1398837_at   | transcription elongation factor B (SIII), polypeptide 2                                                                                                     | Tceb2                      | 1.4 | 0.002995941 | 0.021130037 |
| 1379914_at   | transcription factor CP2-like 2                                                                                                                             | Tcfcp2l2                   | 1.7 | 0.003000904 | 0.021130037 |
| 1372945_at   | inhibitor of growth family, member 3                                                                                                                        | Ing3                       | 1.5 | 0.003006669 | 0.021152135 |
| 1374261_at   | Transcribed locus                                                                                                                                           | ---                        | 1.7 | 0.003011679 | 0.021178321 |
| 1370063_at   | nuclear receptor subfamily 2, group F, member 2                                                                                                             | Nr2f2                      | 2.4 | 0.003014631 | 0.021190021 |
| 1398620_at   | Transcribed locus                                                                                                                                           | ---                        | 2.3 | 0.003016829 | 0.021196411 |
| 1374193_at   | Transcribed locus                                                                                                                                           | ---                        | 2.2 | 0.003023262 | 0.021232539 |
| 1393239_at   | Mitochondrial fission regulator 1 (predicted)                                                                                                               | Mtfr1_predicted            | 1.6 | 0.003028292 | 0.021234478 |
| 1389790_at   | Transcribed locus                                                                                                                                           | ---                        | 2.3 | 0.003030283 | 0.021236509 |
| 1391884_at   | coagulation factor XII (Hageman factor)                                                                                                                     | F12                        | 1.4 | 0.003047164 | 0.021312877 |
| 1373596_at   | similar to hypothetical protein FLJ31737                                                                                                                    | RGD1310423                 | 1.6 | 0.003050178 | 0.021321433 |
| 1392044_at   | Transcribed locus                                                                                                                                           | ---                        | 2.1 | 0.003059747 | 0.021369369 |
| 1368382_at   | S100 calcium binding protein A3                                                                                                                             | S100a3                     | 2.0 | 0.003060934 | 0.021369369 |
| 1389980_at   | similar to Protein HSPC163 (predicted)                                                                                                                      | RGD1559740_predicted       | 2.1 | 0.003070277 | 0.021415848 |
| 1398849_at   | H3 histone, family 3B                                                                                                                                       | H3f3b                      | 1.5 | 0.003088843 | 0.021502283 |
| 1376005_at   | Kinesin family member 1B                                                                                                                                    | Kif1b                      | 1.5 | 0.003089439 | 0.021502283 |
| 1375638_at   | serum deprivation response protein                                                                                                                          | Sdpr                       | 2.0 | 0.003089888 | 0.021502283 |
| 1382468_at   | similar to CG9752-PA                                                                                                                                        | RGD1311345                 | 1.4 | 0.003091642 | 0.021502283 |
| 1376260_at   | similar to KIAA1627 protein (predicted)                                                                                                                     | RGD1304822_predicted       | 1.7 | 0.00309267  | 0.021502283 |
| 1378389_at   | Transcribed locus, strongly similar to XP_225713.3 similar to nuclear factor of activated T-cells, cytoplasmic, calcineurin-dependent 1 [Rattus norvegicus] | ---                        | 2.4 | 0.003093045 | 0.021502283 |
| 1389617_at   | ELK3, member of ETS oncogene family (predicted)                                                                                                             | Elk3_predicted             | 2.1 | 0.003094555 | 0.02150369  |
| 1393608_at   | Transcribed locus                                                                                                                                           | ---                        | 1.3 | 0.003108689 | 0.021583672 |
| 1379376_at   | Transcribed locus                                                                                                                                           | ---                        | 2.1 | 0.003114119 | 0.021612251 |
| 1390480_at   | Transcribed locus                                                                                                                                           | ---                        | 1.4 | 0.003120845 | 0.021640669 |
| 1391218_at   | similar to RIKEN cDNA 2810485I05 (predicted)                                                                                                                | RGD1311077_predicted       | 1.5 | 0.003127134 | 0.021675139 |
| 1398441_at   | non-catalytic region of tyrosine kinase adaptor protein 2 (predicted)                                                                                       | Nck2_predicted             | 1.8 | 0.003155892 | 0.021837654 |
| 1382603_at   | Similar to PD-1-ligand precursor (predicted)                                                                                                                | RGD1566211_predicted       | 1.7 | 0.003163528 | 0.021881289 |

|              |                                                                                                                                                              |                                                                                                                                                                                                                                 |     |             |             |
|--------------|--------------------------------------------------------------------------------------------------------------------------------------------------------------|---------------------------------------------------------------------------------------------------------------------------------------------------------------------------------------------------------------------------------|-----|-------------|-------------|
| 1397341_at   | PDZ binding kinase (predicted)                                                                                                                               | Pbk_predicted                                                                                                                                                                                                                   | 2.7 | 0.00317821  | 0.021964371 |
| 1390450_a_at | osteoglycin (predicted)                                                                                                                                      | Ogn_predicted                                                                                                                                                                                                                   | 2.5 | 0.003198983 | 0.022080095 |
| 1373595_at   | transmembrane protein 43                                                                                                                                     | Tmem43                                                                                                                                                                                                                          | 1.7 | 0.003218239 | 0.022166498 |
|              |                                                                                                                                                              | LOC681221 ///<br>LOC681502 ///<br>LOC682065 ///<br>LOC682793 ///<br>LOC682969 ///<br>LOC685963 ///<br>LOC686435 ///<br>LOC688248 ///<br>LOC689671 ///<br>LOC690468 ///<br>LOC690833 ///<br>RGD1561636_predicted<br>ed /// Rpl38 |     |             |             |
| 1375632_at   | similar to 60S ribosomal protein L38 (predicted) /// similar to 60S ribosomal protein L38 /// ribosomal protein L38 /// 60S ribosomal protein L38 pseudogene |                                                                                                                                                                                                                                 | 1.3 | 0.003221628 | 0.022179565 |
| 1376906_at   | Transcribed locus                                                                                                                                            | ---                                                                                                                                                                                                                             | 1.6 | 0.00322493  | 0.022184716 |
| 1383408_at   | Transcribed locus                                                                                                                                            | ---                                                                                                                                                                                                                             | 1.6 | 0.003248143 | 0.022282817 |
| 1391550_at   | Transcribed locus                                                                                                                                            | ---                                                                                                                                                                                                                             | 1.6 | 0.003251845 | 0.022282817 |
| 1382865_at   | testis specific, 14                                                                                                                                          | Tsga14                                                                                                                                                                                                                          | 1.6 | 0.003259062 | 0.022307553 |
| 1371298_at   | CDNA clone IMAGE:7460165                                                                                                                                     | ---                                                                                                                                                                                                                             | 3.4 | 0.003262985 | 0.022325116 |
| 1383385_at   | Transcribed locus                                                                                                                                            | ---                                                                                                                                                                                                                             | 1.8 | 0.003272547 | 0.022371259 |
| 1371965_at   | similar to RIKEN cDNA 2010311D03                                                                                                                             | RGD1303272                                                                                                                                                                                                                      | 1.4 | 0.00327381  | 0.022371259 |
| 1368256_at   | serine (or cysteine) peptidase inhibitor, clade I, member 1                                                                                                  | Serpini1                                                                                                                                                                                                                        | 1.7 | 0.003275411 | 0.022371396 |
| 1393017_at   | rhophilin, Rho GTPase binding protein 1 (predicted)                                                                                                          | Rhpn1_predicted                                                                                                                                                                                                                 | 1.6 | 0.003300987 | 0.02248255  |
| 1373818_at   | Potassium channel tetramerisation domain containing 12 (predicted)                                                                                           | Kctd12_predicted                                                                                                                                                                                                                | 1.4 | 0.003311998 | 0.022519944 |
| 1388345_at   | ---                                                                                                                                                          | ---                                                                                                                                                                                                                             | 1.3 | 0.00331524  | 0.022532671 |
| 1378362_at   | similar to Complement C1q-like protein 3 precursor (Gliacolin)                                                                                               | LOC680404 ///<br>LOC684921                                                                                                                                                                                                      | 2.7 | 0.003324073 | 0.022574052 |
| 1398405_at   | similar to septin 6                                                                                                                                          | LOC691335                                                                                                                                                                                                                       | 1.5 | 0.003327837 | 0.02257564  |
| 1375853_at   | similar to CG13957-PA (predicted)                                                                                                                            | RGD1309995_predicted<br>ed                                                                                                                                                                                                      | 1.3 | 0.00333873  | 0.02260825  |
| 1388328_at   | similar to Eukaryotic translation initiation factor 3 subunit 2 (eIF-3 beta) (eIF3 p36) (eIF3i) (TGF-beta receptor-interacting protein 1) (TRIP-1)           | LOC682390                                                                                                                                                                                                                       | 1.3 | 0.003340216 | 0.022608999 |
| 1380148_at   | Transcribed locus                                                                                                                                            | ---                                                                                                                                                                                                                             | 1.5 | 0.003344018 | 0.022625428 |
| 1375912_a_at | UDP-N-acetyl-alpha-D-galactosamine:polypeptide N-acetylgalactosaminyltransferase 2 (predicted)                                                               | Galnt2_predicted                                                                                                                                                                                                                | 1.9 | 0.003363515 | 0.02271539  |
| 1390112_at   | epidermal growth factor-containing fibulin-like extracellular matrix protein 1                                                                               | Efemp1                                                                                                                                                                                                                          | 1.5 | 0.003368312 | 0.02271539  |
| 1391994_at   | Transcribed locus                                                                                                                                            | ---                                                                                                                                                                                                                             | 1.5 | 0.003369413 | 0.02271539  |
| 1377990_at   | Transcribed locus                                                                                                                                            | ---                                                                                                                                                                                                                             | 2.1 | 0.003369744 | 0.02271539  |
| 1373970_at   | similar to RIKEN cDNA 9230117N10                                                                                                                             | RGD1311155                                                                                                                                                                                                                      | 1.9 | 0.003371587 | 0.022718504 |
| 1384330_at   | similar to hypothetical protein FLJ20546                                                                                                                     | LOC303067                                                                                                                                                                                                                       | 1.5 | 0.003377077 | 0.022721768 |
| 1370526_at   | integrin, alpha E, epithelial-associated                                                                                                                     | Itgae                                                                                                                                                                                                                           | 1.8 | 0.003377451 | 0.022721768 |
| 1382109_at   | nuclear NF-kappaB activating protein                                                                                                                         | 2610020o08rik                                                                                                                                                                                                                   | 1.3 | 0.003379445 | 0.022721768 |
| 1372360_at   | ---                                                                                                                                                          | ---                                                                                                                                                                                                                             | 1.4 | 0.003379534 | 0.022721768 |
| 1399125_at   | inositol polyphosphate-1-phosphatase                                                                                                                         | Inpp1                                                                                                                                                                                                                           | 1.4 | 0.00338036  | 0.022721768 |
| 1382275_at   | similar to PAK/PLC-interacting protein 1                                                                                                                     | MGC125015                                                                                                                                                                                                                       | 1.6 | 0.003390396 | 0.022761318 |
| 1372543_at   | similar to RIKEN cDNA 2610029G23 (predicted)                                                                                                                 | RGD1562502_predicted<br>ed                                                                                                                                                                                                      | 2.4 | 0.003417887 | 0.022908475 |
| 1371119_at   | MHC class I RT1.O type 149 processed pseudogene                                                                                                              | LOC360231                                                                                                                                                                                                                       | 1.5 | 0.003437604 | 0.023016353 |
| 1382614_at   | similar to Zinc finger, FYVE domain containing 16 (predicted)                                                                                                | RGD1564784_predicted<br>ed                                                                                                                                                                                                      | 1.5 | 0.00343818  | 0.023016353 |
| 1386145_at   | ---                                                                                                                                                          | ---                                                                                                                                                                                                                             | 1.5 | 0.003443271 | 0.023041061 |
| 1378296_at   | similar to Condensin complex subunit 2 (Barren homolog protein 1) (Chromosome-associated protein H) (mCAP-H) (XCAP-H homolog)                                | LOC680089 ///<br>LOC688088                                                                                                                                                                                                      | 1.5 | 0.00346283  | 0.023162515 |
| 1372918_at   | ---                                                                                                                                                          | ---                                                                                                                                                                                                                             | 1.7 | 0.003464536 | 0.023164507 |
| 1376836_at   | ---                                                                                                                                                          | ---                                                                                                                                                                                                                             | 1.9 | 0.003468444 | 0.023181212 |

|              |                                                                                   |                                    |     |             |             |
|--------------|-----------------------------------------------------------------------------------|------------------------------------|-----|-------------|-------------|
| 1383250_at   | UTP14, U3 small nucleolar ribonucleoprotein, homolog A (yeast)                    | Utp14a                             | 1.5 | 0.00347102  | 0.02318901  |
| 1368195_at   | Hspb associated protein 1                                                         | Hspbap1                            | 1.4 | 0.00347537  | 0.023208644 |
| 1370916_at   | tec protein tyrosine kinase                                                       | Tec                                | 1.6 | 0.003489589 | 0.023275246 |
| 1393020_at   | ---                                                                               | ---                                | 1.6 | 0.003493835 | 0.02329412  |
| 1386477_at   | Transcribed locus                                                                 | ---                                | 1.6 | 0.003497677 | 0.023305989 |
| 1392541_at   | similar to RIKEN cDNA A030007L17; EST AA673177 (predicted) /// similar to C44B7.7 | LOC685702 /// RGD1304876_predicted | 1.8 | 0.003524132 | 0.023420174 |
| 1386979_at   | developmentally regulated protein TPO1                                            | Tpo1                               | 1.6 | 0.003526175 | 0.023424184 |
| 1389483_at   | Dpy-19-like 1 (C. elegans) (predicted)                                            | Dpy19l1_predicted                  | 1.6 | 0.003527584 | 0.023424184 |
| 1387644_at   | betacellulin                                                                      | Btc                                | 1.5 | 0.003559193 | 0.023586925 |
| 1377787_at   | similar to Rbm6 protein (predicted)                                               | RGD1560367_predicted               | 1.5 | 0.003560427 | 0.023586925 |
| 1367602_at   | Cbp/p300-interacting transactivator, with Glu/Asp-rich carboxy-terminal domain, 2 | Cited2                             | 2.8 | 0.003561077 | 0.023586925 |
| 1374942_at   | carboxypeptidase X 2 (M14 family) (predicted)                                     | Cpxm2_predicted                    | 1.7 | 0.003564998 | 0.023586925 |
| 1373670_at   | Signal transducer and activator of transcription 2                                | Stat2                              | 1.6 | 0.003575846 | 0.023620688 |
| 1382904_at   | similar to hypothetical protein DKFZp434K1421                                     | RGD1309863                         | 1.6 | 0.003594236 | 0.023705986 |
| 1387854_at   | procollagen, type I, alpha 2                                                      | Col1a2                             | 1.7 | 0.003598018 | 0.023719519 |
| 1377611_at   | Transcribed locus                                                                 | ---                                | 1.7 | 0.003613667 | 0.02377472  |
| 1367936_at   | serine/threonine kinase 10                                                        | Stk10                              | 1.6 | 0.003615442 | 0.02377472  |
| 1370219_at   | cytochrome b-245, alpha polypeptide                                               | Cyba                               | 1.7 | 0.003615548 | 0.02377472  |
| 1398549_at   | ---                                                                               | ---                                | 1.4 | 0.003615948 | 0.02377472  |
| 1387080_at   | chondroitin sulfate proteoglycan 6                                                | Cspg6                              | 1.4 | 0.00361651  | 0.02377472  |
| 1378536_at   | Transcribed locus                                                                 | ---                                | 1.4 | 0.003636033 | 0.023874438 |
| 1373159_at   | Transcribed locus                                                                 | ---                                | 1.7 | 0.003645664 | 0.023920789 |
| 1372297_at   | glutathione S-transferase, alpha 4                                                | Gsta4                              | 1.7 | 0.003650515 | 0.023920789 |
| 1372101_at   | phosphatidic acid phosphatase type 2B                                             | Ppap2b                             | 1.4 | 0.003650547 | 0.023920789 |
| 1373674_at   | microfibrillar associated protein 5 (predicted)                                   | Mfap5_predicted                    | 2.1 | 0.003660661 | 0.02395963  |
| 1385238_at   | Transcribed locus                                                                 | ---                                | 1.3 | 0.003674807 | 0.024033091 |
| 1383095_at   | Transcribed locus                                                                 | ---                                | 1.6 | 0.003682293 | 0.024072475 |
| 1372019_at   | similar to DNA segment, Chr 13, Wayne State University 50, expressed (predicted)  | RGD1310128_predicted               | 1.4 | 0.003715607 | 0.024190595 |
| 1369113_at   | gremlin 1 homolog, cysteine knot superfamily (Xenopus laevis)                     | Grem1                              | 1.5 | 0.003715792 | 0.024190595 |
| 1390933_a_at | RNA (guanine-9-) methyltransferase domain containing 3                            | Rg9mtd3                            | 1.8 | 0.003733484 | 0.02428167  |
| 1384451_at   | Transcribed locus                                                                 | ---                                | 1.6 | 0.003737561 | 0.02429858  |
| 1368824_at   | caldesmon 1                                                                       | Cald1                              | 1.8 | 0.003742481 | 0.024317716 |
| 1378395_at   | Transcribed locus                                                                 | ---                                | 1.3 | 0.003744494 | 0.024317716 |
| 1380206_at   | Kinesin family member 5C (predicted)                                              | Kif5c_predicted                    | 1.4 | 0.003758126 | 0.024391345 |
| 1390574_at   | Transcribed locus                                                                 | ---                                | 1.4 | 0.003759245 | 0.024391345 |
| 1389394_at   | Transcribed locus                                                                 | ---                                | 1.6 | 0.003762594 | 0.024403447 |
| 1390093_at   | Similar to Ribulose-5-phosphate-3-epimerase                                       | MGC124653                          | 1.6 | 0.003783366 | 0.024509178 |
| 1393972_at   | metal response element binding transcription factor 2                             | Mtf2                               | 1.4 | 0.003811491 | 0.024652538 |
| 1378740_at   | RAS protein activator like 2 (predicted)                                          | Rasal2_predicted                   | 2.1 | 0.003813382 | 0.024655073 |
| 1377516_at   | Odd Oz/ten-m homolog 2 (Drosophila)                                               | Odz2                               | 2.2 | 0.003818527 | 0.024668945 |
| 1367769_at   | polymerase (RNA) II (DNA directed) polypeptide G                                  | Polr2g                             | 1.4 | 0.003820469 | 0.024671797 |
| 1379450_at   | CTTNBP2 N-terminal like (predicted)                                               | Cttnbp2nl_predicted                | 1.5 | 0.003843565 | 0.024773335 |
| 1377595_at   | sperm specific antigen 2 (predicted)                                              | Ssfa2_predicted                    | 1.3 | 0.003845229 | 0.024773335 |
| 1373869_at   | sterol O-acyltransferase 1                                                        | Soat1                              | 1.6 | 0.003849835 | 0.024788306 |
| 1395316_at   | melanoma antigen, family H, 1                                                     | Mageh1                             | 1.6 | 0.003852175 | 0.024788306 |
| 1378843_at   | DnaJ (Hsp40) homolog, subfamily B, member 6                                       | Dnajb6                             | 2.1 | 0.003858101 | 0.024788306 |
| 1376483_at   | LSM5 homolog, U6 small nuclear RNA associated (S. cerevisiae) (predicted)         | Lsm5_predicted                     | 2.0 | 0.003859609 | 0.024788306 |
| 1371862_at   | ribonucleotide reductase M1                                                       | Rrm1                               | 1.5 | 0.003863838 | 0.02479751  |
| 1368589_at   | protein tyrosine phosphatase, receptor type, J                                    | Ptprj                              | 1.7 | 0.003876299 | 0.024817968 |
| 1382746_s_at | Alpha-kinase 1 (predicted)                                                        | Alpk1_predicted                    | 1.5 | 0.003881474 | 0.024835097 |

|            |                                                                                                               |                            |     |             |             |
|------------|---------------------------------------------------------------------------------------------------------------|----------------------------|-----|-------------|-------------|
| 1389188_at | G protein-coupled receptor 108                                                                                | Gpr108                     | 1.4 | 0.003881994 | 0.024835097 |
| 1372286_at | tetraspanin 6                                                                                                 | Tspan6                     | 1.4 | 0.003898334 | 0.024910565 |
| 1383531_at | ---                                                                                                           | ---                        | 1.4 | 0.003903714 | 0.024925577 |
| 1367509_at | similar to general transcription factor IIH, polypeptide 5 (predicted)                                        | RGD1560991_predicted       | 1.4 | 0.00391065  | 0.024960177 |
| 1388015_at | protein tyrosine phosphatase, receptor-type, Z polypeptide 1                                                  | Ptprz1                     | 1.4 | 0.003918169 | 0.024980262 |
| 1389204_at | ---                                                                                                           | ---                        | 1.7 | 0.003918353 | 0.024980262 |
| 1371130_at | solute carrier family 1 (glial high affinity glutamate transporter), member 3                                 | Slc1a3                     | 2.2 | 0.00393915  | 0.025073969 |
| 1383339_at | similar to NNX3 (predicted)                                                                                   | RGD1310358_predicted       | 1.6 | 0.003947158 | 0.025090615 |
| 1389918_at | ---                                                                                                           | ---                        | 2.3 | 0.003947867 | 0.025090615 |
| 1368422_at | mesenchyme homeobox 2                                                                                         | Meox2                      | 2.9 | 0.003959473 | 0.025144948 |
| 1397387_at | Transcribed locus                                                                                             | ---                        | 1.4 | 0.003984066 | 0.025271851 |
| 1396383_at | aldehyde dehydrogenase 3 family, member B1                                                                    | Aldh3b1                    | 1.4 | 0.003990293 | 0.025293855 |
| 1394925_at | similar to RIKEN cDNA 2310035C23 (predicted)                                                                  | RGD1307235_predicted       | 1.6 | 0.00399061  | 0.025293855 |
| 1398386_at | Similar to Zinc finger CCHC domain-containing protein 6                                                       | LOC501515                  | 1.3 | 0.004004535 | 0.025333308 |
| 1373905_at | heterogeneous nuclear ribonucleoprotein R                                                                     | Hnrpr                      | 1.4 | 0.004013791 | 0.025382095 |
| 1383644_at | Transcribed locus                                                                                             | ---                        | 2.2 | 0.004015389 | 0.025382442 |
| 1376101_at | low density lipoprotein receptor-related protein 6 (predicted)                                                | Lrp6_predicted             | 1.4 | 0.004021975 | 0.025406468 |
| 1389372_at | similar to hypothetical protein (predicted)                                                                   | RGD1308489_predicted       | 1.4 | 0.004022279 | 0.025406468 |
| 1393336_at | SWAP complex protein (predicted)                                                                              | Swap70_predicted           | 1.4 | 0.004024268 | 0.025409274 |
| 1388939_at | procollagen, type XV                                                                                          | Col15a1                    | 1.9 | 0.004029928 | 0.025426364 |
| 1377728_at | RGD1565641 (predicted)                                                                                        | RGD1565641_predicted       | 2.2 | 0.004031811 | 0.025427618 |
| 1372414_at | Transcribed locus                                                                                             | ---                        | 1.4 | 0.004037025 | 0.025450743 |
| 1377072_at | Transcribed locus, strongly similar to XP_001077488.1 similar to ankyrin repeat domain 25 [Rattus norvegicus] | ---                        | 1.8 | 0.004047246 | 0.025498764 |
| 1372877_at | procollagen-lysine, 2-oxoglutarate 5-dioxygenase 3                                                            | Plod3                      | 1.4 | 0.004075643 | 0.025654869 |
| 1369633_at | chemokine (C-X-C motif) ligand 12                                                                             | Cxcl12                     | 1.8 | 0.004086538 | 0.025713607 |
| 1375205_at | p300/CBP-associated factor                                                                                    | Pcaf                       | 1.6 | 0.004090636 | 0.02572955  |
| 1384392_at | cytochrome P450, family 26, subfamily b, polypeptide 1                                                        | Cyp26b1                    | 2.6 | 0.004113795 | 0.025855445 |
| 1392653_at | Transcribed locus                                                                                             | ---                        | 1.9 | 0.004151053 | 0.026029936 |
| 1380594_at | signal peptide, CUB domain, EGF-like 1                                                                        | Scube1                     | 1.4 | 0.00416521  | 0.026100051 |
| 1395130_at | ---                                                                                                           | ---                        | 2.1 | 0.00417207  | 0.026113384 |
| 1389636_at | similar to KIAA0833 protein /// similar to calmodulin-binding transcription activator 1                       | LOC362665 ///<br>LOC500591 | 1.7 | 0.004173887 | 0.026113384 |
| 1377992_at | Dual specificity phosphatase 7                                                                                | Dusp7                      | 2.8 | 0.004187415 | 0.026170965 |
| 1374689_at | phosphatidylinositol 4-kinase, catalytic, beta polypeptide                                                    | Pik4cb                     | 1.3 | 0.004189355 | 0.026170965 |
| 1387300_at | Crn, crooked neck-like 1 (Drosophila)                                                                         | Crnk1                      | 1.5 | 0.004189455 | 0.026170965 |
| 1396323_at | similar to Protein C10orf11 homolog                                                                           | LOC681383                  | 1.4 | 0.004198498 | 0.0262175   |
| 1369161_at | ATP-binding cassette, sub-family B (MDR/TAP), member 4                                                        | Abcb4                      | 1.4 | 0.004205732 | 0.026242748 |
| 1373310_at | Transcribed locus                                                                                             | ---                        | 1.4 | 0.004208877 | 0.02625241  |
| 1382509_at | similar to CCR4                                                                                               | RGD1310783                 | 1.6 | 0.004215747 | 0.02626538  |
| 1378291_at | FK506 binding protein 3 (predicted)                                                                           | Fkbp3_predicted            | 1.4 | 0.004261096 | 0.026507756 |
| 1378133_at | Transcribed locus                                                                                             | ---                        | 1.9 | 0.004268968 | 0.026536651 |
| 1373413_at | similar to RIKEN cDNA 2810021O14 (predicted)                                                                  | RGD1310481_predicted       | 1.4 | 0.004270806 | 0.026537094 |
| 1370959_at | procollagen, type III, alpha 1                                                                                | Col3a1                     | 1.8 | 0.004277392 | 0.026548885 |
| 1375553_at | similar to RIKEN cDNA 5133400G04                                                                              | RGD1311742                 | 1.4 | 0.004300551 | 0.0266725   |
| 1378038_at | Polypyrimidine tract binding protein 2                                                                        | Ptbp2                      | 2.9 | 0.0043119   | 0.026732806 |
| 1380926_at | Transcribed locus                                                                                             | ---                        | 1.8 | 0.004341647 | 0.026846393 |
| 1381259_at | stromal antigen 1 (predicted)                                                                                 | Stag1_predicted            | 1.5 | 0.004344886 | 0.026856329 |
| 1374208_at | zinc finger CCCH type containing 7 A (predicted)                                                              | Zc3h7a_predicted           | 1.5 | 0.004347651 | 0.026861534 |

|              |                                                                                                                           |                      |     |             |             |
|--------------|---------------------------------------------------------------------------------------------------------------------------|----------------------|-----|-------------|-------------|
| 1389358_at   | Similar to lysophosphatidylglycerol acyltransferase 1                                                                     | LOC679692            | 1.7 | 0.004352443 | 0.026869213 |
| 1370190_at   | H3 histone, family 3B                                                                                                     | H3f3b                | 1.5 | 0.004353505 | 0.026869213 |
| 1383705_at   | CDNA clone IMAGE:7317308                                                                                                  | ---                  | 1.5 | 0.004378221 | 0.027002346 |
| 1398756_at   | nucleophosmin 1 /// similar to Nucleophosmin (NPM) (Nucleolar phosphoprotein B23) (Numatrin) (Nucleolar protein NO38)     | LOC300303 /// Npm1   | 1.4 | 0.004381533 | 0.027002346 |
| 1390171_at   | similar to hypothetical protein BC008163 (predicted)                                                                      | RGD1305162_predicted | 1.4 | 0.004381571 | 0.027002346 |
| 1382370_at   | cyclin F                                                                                                                  | Ccnf                 | 1.3 | 0.004381643 | 0.027002346 |
| 1383902_at   | leucine-rich repeats and IQ motif containing 2 (predicted)                                                                | Lrriq2_predicted     | 1.4 | 0.004395541 | 0.02704502  |
| 1372647_at   | ---                                                                                                                       | ---                  | 1.9 | 0.004397329 | 0.02704502  |
| 1389208_at   | ---                                                                                                                       | ---                  | 1.7 | 0.004398433 | 0.02704502  |
| 1383334_at   | Transcribed locus                                                                                                         | ---                  | 1.4 | 0.004447283 | 0.027296144 |
| 1371316_at   | Finkel-Biskis-Reilly murine sarcoma virus (FBR-MuSV) ubiquitously expressed (fox derived) protein                         | Fau                  | 1.4 | 0.004451654 | 0.027300819 |
| 1394814_at   | translocated promoter region                                                                                              | Tpr                  | 2.3 | 0.004453927 | 0.027304582 |
| 1383894_at   | Rap guanine nucleotide exchange factor (GEF) 6 (predicted)                                                                | Rapgef6_predicted    | 1.8 | 0.004457355 | 0.027313439 |
| 1398356_at   | cleavage and polyadenylation specific factor 5                                                                            | Cpsf5                | 1.3 | 0.004458693 | 0.027313439 |
| 1393451_at   | similar to RIKEN cDNA 2610510J17                                                                                          | RGD1310953           | 1.4 | 0.004472672 | 0.027360564 |
| 1371512_at   | ---                                                                                                                       | ---                  | 1.4 | 0.00447304  | 0.027360564 |
| 1390931_at   | Transcribed locus                                                                                                         | ---                  | 1.4 | 0.004485026 | 0.027410884 |
| 1377939_at   | Similar to APG4 autophagy 4 homolog C                                                                                     | LOC313391            | 1.4 | 0.004491265 | 0.027410884 |
| 1378074_at   | Transcribed locus                                                                                                         | ---                  | 1.5 | 0.004498116 | 0.027425227 |
| 1398839_at   | thioredoxin 1                                                                                                             | Txn1                 | 1.3 | 0.004498618 | 0.027425227 |
| 1382154_at   | Transcribed locus, moderately similar to XP_519168.2 protein tyrosine phosphatase, non-receptor type 12 [Pan troglodytes] | ---                  | 1.5 | 0.004507842 | 0.027461108 |
| 1382058_at   | related RAS viral (r-ras) oncogene homolog 2                                                                              | Rras2                | 2.0 | 0.004517904 | 0.027502031 |
| 1372778_at   | Transcribed locus                                                                                                         | ---                  | 1.9 | 0.004521754 | 0.027515285 |
| 1393365_at   | chromodomain helicase DNA binding protein 1 (predicted)                                                                   | Chd1_predicted       | 1.7 | 0.004535327 | 0.027587668 |
| 1375841_at   | Transcribed locus                                                                                                         | ---                  | 1.5 | 0.004538074 | 0.027590404 |
| 1387018_at   | Arg/Abl-interacting protein ArgBP2                                                                                        | Argbp2               | 1.5 | 0.004541761 | 0.027596189 |
| 1369970_at   | vesicle-associated membrane protein 8                                                                                     | Vamp8                | 1.5 | 0.004548855 | 0.02761779  |
| 1376159_at   | similar to zinc finger protein 336 (predicted)                                                                            | RGD1562321_predicted | 1.5 | 0.004553936 | 0.027619152 |
| 1385088_at   | hypothetical LOC304650 (predicted)                                                                                        | RGD1310262_predicted | 1.8 | 0.004579477 | 0.027739051 |
| 1375504_at   | polymerase (DNA directed), gamma 2, accessory subunit (predicted)                                                         | Polg2_predicted      | 1.3 | 0.004580451 | 0.027739051 |
| 1389299_at   | ---                                                                                                                       | ---                  | 1.3 | 0.004604349 | 0.027839625 |
| 1367696_at   | interferon induced transmembrane protein 2 (1-8D)                                                                         | Ifitm2               | 1.5 | 0.004605282 | 0.027839625 |
| 1380908_at   | Cd200 antigen                                                                                                             | Cd200                | 1.6 | 0.004607181 | 0.027839625 |
| 1391759_at   | SH3-domain GRB2-like B1 (endophilin)                                                                                      | Sh3glb1              | 1.6 | 0.004607214 | 0.027839625 |
| 1390514_at   | similar to hypothetical protein from BCRA2 region                                                                         | MGC94223             | 1.3 | 0.004622874 | 0.027893263 |
| 1377806_at   | ---                                                                                                                       | ---                  | 1.6 | 0.004629889 | 0.027914124 |
| 1388650_at   | topoisomerase (DNA) 2 alpha                                                                                               | Top2a                | 2.3 | 0.004631423 | 0.027914124 |
| 1374428_at   | kinesin family member 3B (predicted)                                                                                      | Kif3b_predicted      | 1.4 | 0.00463555  | 0.027921888 |
| 1372481_at   | Transcribed locus, strongly similar to XP_223083.3 similar to CD34 antigen [Rattus norvegicus]                            | ---                  | 1.5 | 0.004636106 | 0.027921888 |
| 1377369_at   | cytochrome b reductase 1                                                                                                  | Cybrd1               | 1.3 | 0.004638019 | 0.027923182 |
| 1393779_x_at | ---                                                                                                                       | ---                  | 2.4 | 0.004644861 | 0.027954145 |
| 1373868_at   | ---                                                                                                                       | ---                  | 1.5 | 0.004666696 | 0.028023421 |
| 1381117_at   | Ribosomal protein S5                                                                                                      | Rps5                 | 1.4 | 0.004674479 | 0.028050287 |
| 1383949_at   | thyroid hormone receptor associated protein 2 (predicted)                                                                 | Thrap2_predicted     | 1.5 | 0.004685413 | 0.028085946 |

|              |                                                                                                                                                                            |                                                   |     |             |             |
|--------------|----------------------------------------------------------------------------------------------------------------------------------------------------------------------------|---------------------------------------------------|-----|-------------|-------------|
| 1388792_at   | growth arrest and DNA-damage-inducible 45 gamma                                                                                                                            | Gadd45g                                           | 2.2 | 0.004687994 | 0.028085946 |
| 1385595_at   | similar to antigenic determinant of rec-A protein                                                                                                                          | LOC683353 ///<br>LOC689197                        | 1.6 | 0.004689965 | 0.028085946 |
| 1384262_at   | protein phosphatase 1, regulatory (inhibitor) subunit 3B                                                                                                                   | Ppp1r3b                                           | 1.5 | 0.004719753 | 0.028229273 |
| 1375061_at   | Transcribed locus                                                                                                                                                          | ---                                               | 1.4 | 0.004723595 | 0.028231717 |
| 1380088_at   | Transcribed locus                                                                                                                                                          | ---                                               | 1.8 | 0.004729281 | 0.028247074 |
| 1372558_at   | NMDA receptor-regulated gene 1 (predicted)                                                                                                                                 | Narg1_predicted                                   | 1.3 | 0.004732669 | 0.028247074 |
| 1372081_at   | Transcribed locus                                                                                                                                                          | ---                                               | 1.3 | 0.004732779 | 0.028247074 |
| 1392915_at   | procollagen, type XI, alpha 1                                                                                                                                              | Col11a1                                           | 1.7 | 0.004733033 | 0.028247074 |
| 1392723_at   | Similar to ankyrin repeat domain protein 17 isoform b (predicted)                                                                                                          | RGD1562348_predicted                              | 1.3 | 0.004737747 | 0.028264946 |
| 1378574_at   | CDNA clone MGC:105770<br>IMAGE:7319366                                                                                                                                     | ---                                               | 1.8 | 0.004742132 | 0.028280852 |
| 1374411_at   | mitochondrial ribosomal protein L52 (predicted)                                                                                                                            | Mrpl52_predicted                                  | 1.8 | 0.004751495 | 0.028316154 |
| 1391023_at   | Transcribed locus                                                                                                                                                          | ---                                               | 1.4 | 0.0047626   | 0.028341259 |
| 1381525_at   | ---                                                                                                                                                                        | ---                                               | 1.3 | 0.004766195 | 0.028346613 |
| 1372750_at   | Transcribed locus                                                                                                                                                          | ---                                               | 2.7 | 0.004769899 | 0.028353921 |
| 1391871_at   | Transcribed locus                                                                                                                                                          | ---                                               | 1.8 | 0.004772695 | 0.028355541 |
| 1376324_at   | Transcribed locus, weakly similar to NP_055333.2 finger protein 229 [Homo sapiens]                                                                                         | ---                                               | 1.6 | 0.004773619 | 0.028355541 |
| 1383152_at   | similar to Cc1-9                                                                                                                                                           | RGD1308955                                        | 1.4 | 0.004783663 | 0.028388205 |
| 1389569_at   | brix domain containing 2                                                                                                                                                   | Bxdc2                                             | 1.5 | 0.004784296 | 0.028388205 |
| 1373600_at   | Similar to CG9996-PA                                                                                                                                                       | LOC300173                                         | 1.9 | 0.004794676 | 0.028439536 |
| 1374427_at   | Synaptotagmin XIII                                                                                                                                                         | Syt13                                             | 1.7 | 0.004798767 | 0.02844338  |
| 1385608_at   | Transcribed locus                                                                                                                                                          | ---                                               | 1.7 | 0.004798783 | 0.02844338  |
| 1368304_at   | flavin containing monooxygenase 3                                                                                                                                          | Fmo3                                              | 2.6 | 0.004813283 | 0.028498515 |
| 1382305_at   | ---                                                                                                                                                                        | ---                                               | 3.0 | 0.004834928 | 0.028595789 |
| 1389281_at   | Transcribed locus, weakly similar to XP_001055725.1 similar to ankyrin repeat domain 15 [Rattus norvegicus]                                                                | ---                                               | 1.6 | 0.004868467 | 0.028732164 |
| 1369712_at   | serine/threonine kinase 3 (STE20 homolog, yeast)                                                                                                                           | Stk3                                              | 1.5 | 0.004879789 | 0.02876802  |
| 1395561_at   | heterogeneous nuclear ribonucleoprotein A2/B1 (predicted)                                                                                                                  | Hnrpa2b1_predicted                                | 2.7 | 0.004882717 | 0.028774966 |
| 1371521_at   | similar to Paired amphipathic helix protein Sin3b (Transcriptional corepressor Sin3b) (Histone deacetylase complex subunit Sin3b)                                          | LOC683381                                         | 1.4 | 0.004886002 | 0.028775782 |
| 1382238_at   | similar to cell division cycle and apoptosis regulator 1 (predicted)                                                                                                       | RGD1560358_predicted                              | 1.6 | 0.004895644 | 0.028820171 |
| 1373777_at   | Transcribed locus                                                                                                                                                          | ---                                               | 1.6 | 0.004905445 | 0.028865082 |
| 1397610_at   | Transcribed locus                                                                                                                                                          | ---                                               | 1.6 | 0.004910945 | 0.028868912 |
| 1381175_at   | similar to modulator of estrogen induced transcription                                                                                                                     | RGD1307526                                        | 2.5 | 0.004917415 | 0.028896622 |
| 1391474_at   | similar to cofactor required for Sp1 transcriptional activation, subunit 2, 150kDa (predicted)                                                                             | RGD1560170_predicted                              | 1.5 | 0.004934523 | 0.028955775 |
| 1382072_at   | Similar to cis-Golgi matrix protein GM130                                                                                                                                  | LOC690485                                         | 1.8 | 0.004945408 | 0.028998958 |
| 1374579_at   | similar to RIKEN cDNA E230015L20 gene (predicted)                                                                                                                          | RGD1560873_predicted                              | 1.7 | 0.004975198 | 0.029163242 |
| 1390722_at   | ---                                                                                                                                                                        | ---                                               | 2.0 | 0.004982131 | 0.029163972 |
| 1383336_at   | similar to Pinin                                                                                                                                                           | LOC368070                                         | 1.7 | 0.004982415 | 0.029163972 |
| 1370383_s_at | RT1 class II, locus Db1                                                                                                                                                    | RT1-Db1                                           | 5.5 | 0.004987761 | 0.029174502 |
| 1383981_at   | ---                                                                                                                                                                        | ---                                               | 1.5 | 0.004991308 | 0.029184866 |
| 1375270_at   | Transcribed locus                                                                                                                                                          | ---                                               | 2.1 | 0.00499707  | 0.029208176 |
| 1388794_at   | RNA binding motif protein, X chromosome retrogene (predicted) /// similar to Heterogeneous nuclear ribonucleoprotein G (hnRNP G) (RNA-binding motif protein, X chromosome) | LOC679457 ///<br>LOC680944 ///<br>Rbmxt_predicted | 1.5 | 0.005009345 | 0.029269523 |
| 1381016_at   | Inositol 1,3,4,5,6-pentakisphosphate 2-kinase                                                                                                                              | Ippk                                              | 1.4 | 0.005014017 | 0.029286419 |
| 1385248_a_at | osteoglycin (predicted)                                                                                                                                                    | Ogn_predicted                                     | 2.5 | 0.005050114 | 0.029444975 |

|              |                                                                                                                               |                      |     |             |             |
|--------------|-------------------------------------------------------------------------------------------------------------------------------|----------------------|-----|-------------|-------------|
| 1386097_at   | ---                                                                                                                           | ---                  | 1.7 | 0.005055327 | 0.029464928 |
| 1384240_at   | angiotensin II receptor, type 1 (AT1A)                                                                                        | Agtr1a               | 1.4 | 0.005061369 | 0.029479248 |
| 1377321_at   | Myeloid/lymphoid or mixed-lineage leukemia 5 (trithorax homolog, Drosophila)                                                  | Mll5                 | 2.1 | 0.005069446 | 0.029496544 |
| 1379652_at   | AT hook containing transcription factor 1 (predicted)                                                                         | Ahctf1_predicted     | 1.4 | 0.005071741 | 0.029496544 |
| 1383829_at   | bobby sox homolog (Drosophila) (predicted)                                                                                    | Bbx_predicted        | 1.4 | 0.005072936 | 0.029496544 |
| 1388368_at   | mediator of RNA polymerase II transcription, subunit 28 homolog (yeast) (predicted)                                           | Med28_predicted      | 1.8 | 0.005076814 | 0.029496544 |
| 1395372_at   | Integrin beta 8 (predicted)                                                                                                   | Itgb8_predicted      | 1.8 | 0.005078685 | 0.029496544 |
| 1392840_at   | Transcribed locus                                                                                                             | ---                  | 2.3 | 0.005091671 | 0.029561528 |
| 1388704_at   | ---                                                                                                                           | ---                  | 1.7 | 0.005099207 | 0.029591365 |
| 1393109_at   | CDNA clone IMAGE:7302574                                                                                                      | ---                  | 2.2 | 0.005124813 | 0.02971199  |
| 1377194_a_at | similar to RIKEN cDNA 2310015N07                                                                                              | RGD1308637           | 1.4 | 0.005132485 | 0.029735513 |
| 1393431_at   | similar to Splicing factor U2AF 35 kDa subunit (U2 auxiliary factor 35 kDa subunit) (U2 snRNP auxiliary factor small subunit) | LOC687575            | 2.0 | 0.005142611 | 0.029783688 |
| 1374405_at   | heterogeneous nuclear ribonucleoprotein A3                                                                                    | Hnrpa3               | 1.3 | 0.005149477 | 0.029812953 |
| 1398450_at   | Transcribed locus                                                                                                             | ---                  | 1.4 | 0.005152086 | 0.029817559 |
| 1373497_at   | Transcribed locus                                                                                                             | ---                  | 1.6 | 0.005166591 | 0.029880447 |
| 1397096_at   | Similar to 4933407C03Rik protein (predicted)                                                                                  | RGD1306101_predicted | 1.5 | 0.005174727 | 0.029906503 |
| 1390165_at   | PR domain containing 15 (predicted)                                                                                           | Prdm15_predicted     | 1.7 | 0.005197574 | 0.030017449 |
| 1382521_at   | glutaminase                                                                                                                   | Gls                  | 1.8 | 0.005207924 | 0.030045576 |
| 1397508_at   | DEAD (Asp-Glu-Ala-Asp) box polypeptide 18                                                                                     | Ddx18                | 1.8 | 0.005211228 | 0.030054097 |
| 1383687_at   | Transcribed locus                                                                                                             | ---                  | 1.8 | 0.00521939  | 0.030073361 |
| 1387306_a_at | early growth response 2                                                                                                       | Egr2                 | 1.7 | 0.005219396 | 0.030073361 |
| 1372946_at   | similar to RIKEN cDNA 1110012L19 (predicted)                                                                                  | RGD1562747_predicted | 1.4 | 0.005222034 | 0.030073361 |
| 1372389_at   | immediate early response 2                                                                                                    | Ier2                 | 1.8 | 0.005223711 | 0.030073361 |
| 1372301_at   | AE binding protein 1 (predicted)                                                                                              | Aebp1_predicted      | 1.9 | 0.005227121 | 0.030082464 |
| 1368145_at   | Purkinje cell protein 4                                                                                                       | Pcp4                 | 1.5 | 0.005236576 | 0.030118075 |
| 1392465_at   | sin3-associated polypeptide, 18kDa                                                                                            | Sap18                | 1.6 | 0.005270659 | 0.030265409 |
| 1388876_at   | Transcribed locus                                                                                                             | ---                  | 1.5 | 0.00527363  | 0.030265409 |
| 1382745_at   | Alpha-kinase 1 (predicted)                                                                                                    | Alpk1_predicted      | 1.7 | 0.005286622 | 0.030326594 |
| 1373979_at   | Cadherin 23 (otocadherin)                                                                                                     | Cdh23                | 1.4 | 0.005287979 | 0.030326594 |
| 1383296_a_at | exportin 4 (predicted)                                                                                                        | Xpo4_predicted       | 1.7 | 0.005295509 | 0.030338045 |
| 1380445_at   | ---                                                                                                                           | ---                  | 1.8 | 0.005305764 | 0.03036636  |
| 1376594_at   | vascular endothelial zinc finger 1 (predicted)                                                                                | Vezf1_predicted      | 1.6 | 0.005308981 | 0.03036636  |
| 1378714_at   | similar to hypothetical protein BC010003 (predicted)                                                                          | RGD1309873_predicted | 2.0 | 0.005314549 | 0.030373074 |
| 1387039_at   | glypican 1                                                                                                                    | Gpc1                 | 1.7 | 0.005329721 | 0.030428063 |
| 1371251_at   | galactose-1-phosphate uridyl transferase                                                                                      | Galt                 | 1.4 | 0.005337908 | 0.030464229 |
| 1376419_at   | Similar to expressed sequence AI317237 (predicted)                                                                            | RGD1305671_predicted | 1.5 | 0.005343368 | 0.030484813 |
| 1389179_at   | cell death-inducing DNA fragmentation factor, alpha subunit-like effector A (predicted)                                       | Cidea_predicted      | 1.9 | 0.005355841 | 0.030534793 |
| 1370706_a_at | cytochrome P450, family 2, subfamily j, polypeptide 9                                                                         | Cyp2j9               | 1.5 | 0.005363862 | 0.030559333 |
| 1373908_at   | ---                                                                                                                           | ---                  | 1.5 | 0.005371361 | 0.030591463 |
| 1379594_at   | Abelson helper integration site 1                                                                                             | Ahi1                 | 1.8 | 0.005375651 | 0.030605298 |
| 1381798_at   | LIM domain only protein 7                                                                                                     | LMO7                 | 2.6 | 0.005400889 | 0.030727716 |
| 1379377_at   | ganglioside-induced differentiation-associated-protein 2                                                                      | Gdap2                | 1.4 | 0.005418699 | 0.030797084 |
| 1368518_at   | CD53 antigen                                                                                                                  | Cd53                 | 2.4 | 0.005425908 | 0.030816761 |
| 1377463_at   | Mannosidase 2, alpha 2 (predicted)                                                                                            | Man2a2_predicted     | 1.4 | 0.005439334 | 0.030865912 |
| 1379995_at   | Tubulin, beta 2b                                                                                                              | Tubb2b               | 2.6 | 0.005440192 | 0.030865912 |
| 1389459_at   | Similar to RIKEN cDNA 1600012F09 (predicted)                                                                                  | RGD1306613_predicted | 1.3 | 0.005479043 | 0.031054206 |
| 1373738_at   | similar to M phase phosphoprotein 6                                                                                           | LOC686999            | 1.4 | 0.005503394 | 0.031149284 |



|              |                                                                                                                                                                                   |                            |     |             |             |
|--------------|-----------------------------------------------------------------------------------------------------------------------------------------------------------------------------------|----------------------------|-----|-------------|-------------|
| 1373574_at   | similar to hypothetical protein MGC40499 (predicted)                                                                                                                              | RGD1307636_predicted       | 1.4 | 0.00550852  | 0.03116621  |
| 1398617_at   | Transcribed locus, strongly similar to XP_001060577.1 similar to ribosomal protein S27a [Rattus norvegicus]                                                                       | ---                        | 1.6 | 0.005521624 | 0.031188074 |
| 1373262_at   | similar to 2310014H01Rik protein (predicted)                                                                                                                                      | RGD1309543_predicted       | 1.7 | 0.005532344 | 0.031227175 |
| 1388149_at   | transporter 1, ATP-binding cassette, sub-family B (MDR/TAP)                                                                                                                       | Tap1                       | 1.6 | 0.00554369  | 0.031248323 |
| 1380824_at   | hook homolog 3 (Drosophila)                                                                                                                                                       | Hook3                      | 1.4 | 0.005546493 | 0.031253413 |
| 1376374_at   | Transcribed locus                                                                                                                                                                 | ---                        | 1.5 | 0.005555044 | 0.031290879 |
| 1370333_a_at | insulin-like growth factor 1                                                                                                                                                      | Igf1                       | 1.9 | 0.005567933 | 0.031320576 |
| 1377501_at   | similar to zinc finger protein 75 (predicted)                                                                                                                                     | RGD1565419_predicted       | 1.4 | 0.005574013 | 0.031337489 |
| 1399142_at   | Transcribed locus                                                                                                                                                                 | ---                        | 1.4 | 0.005576185 | 0.031337489 |
| 1386641_at   | Transcribed locus                                                                                                                                                                 | ---                        | 2.8 | 0.005576656 | 0.031337489 |
| 1387414_at   | dual oxidase 2                                                                                                                                                                    | Duox2                      | 1.7 | 0.005580397 | 0.031338792 |
| 1387002_at   | maternal G10 transcript                                                                                                                                                           | G10                        | 1.3 | 0.005582603 | 0.031338792 |
| 1383610_at   | ---                                                                                                                                                                               | ---                        | 1.8 | 0.00558569  | 0.03134216  |
| 1375019_at   | heterogeneous nuclear ribonucleoprotein H3 (2H9) (predicted)                                                                                                                      | Hnrph3_predicted           | 1.5 | 0.005587014 | 0.03134216  |
| 1389413_at   | similar to ecotropic viral integration site 2A ectonucleotide                                                                                                                     | LOC685433 ///<br>LOC688044 | 2.1 | 0.005600554 | 0.031398667 |
| 1367905_at   | pyrophosphatase/phosphodiesterase 3                                                                                                                                               | Enpp3                      | 1.5 | 0.005607832 | 0.031409251 |
| 1395968_at   | similar to Myosin-15 (Myosin XV) (Unconventional myosin-15)                                                                                                                       | LOC688264                  | 1.5 | 0.005623759 | 0.031462445 |
| 1391635_at   | CTD (carboxy-terminal domain, RNA polymerase II, polypeptide A) small phosphatase-like (predicted)                                                                                | Ctdspl_predicted           | 1.5 | 0.005632248 | 0.031487121 |
| 1382101_at   | heparan sulfate 2-O-sulfotransferase 1                                                                                                                                            | Hs2st1                     | 1.7 | 0.005633929 | 0.031487121 |
| 1376155_at   | similar to hypothetical protein 2BE2121 - Chinese hamster (fragment) (predicted)                                                                                                  | RGD1561110_predicted       | 1.3 | 0.005635827 | 0.031487121 |
| 1379282_at   | leucine rich repeat (in FLII) interacting protein 2                                                                                                                               | Lrrfp2                     | 1.5 | 0.005647458 | 0.031519981 |
| 1376864_at   | similar to cell division cycle and apoptosis regulator 1 (predicted)                                                                                                              | RGD1560358_predicted       | 2.2 | 0.00565171  | 0.031522324 |
| 1376687_at   | ubiquitin specific peptidase 1                                                                                                                                                    | Usp1                       | 2.3 | 0.00566697  | 0.031584079 |
| 1368205_at   | complement factor I                                                                                                                                                               | Cfi                        | 1.6 | 0.005678207 | 0.031595111 |
| 1389380_at   | similar to Folylpolyglutamate synthase, mitochondrial precursor (Folylpoly-gamma-glutamate synthetase) (FPGS) (Tetrahydrofolate synthase) (Tetrahydrofolylpolyglutamate synthase) | LOC687266                  | 1.5 | 0.005687821 | 0.031616517 |
| 1372938_at   | similar to RIKEN cDNA 6330509G02                                                                                                                                                  | RGD1304726                 | 1.4 | 0.00570946  | 0.031720729 |
| 1398434_at   | death associated transcription factor 1 (predicted)                                                                                                                               | Datf1_predicted            | 1.5 | 0.005727133 | 0.031792063 |
| 1381244_at   | Cut-like 1 (Drosophila)                                                                                                                                                           | Cutl1                      | 1.5 | 0.005731041 | 0.031803024 |
| 1372653_at   | FK506 binding protein 11                                                                                                                                                          | Fkbp11                     | 1.5 | 0.005754543 | 0.031884731 |
| 1398770_at   | large subunit ribosomal protein L36a                                                                                                                                              | Rpl36a                     | 1.5 | 0.005765089 | 0.031927332 |
| 1371438_at   | ---                                                                                                                                                                               | ---                        | 1.6 | 0.005774005 | 0.031955993 |
| 1382415_at   | LOC360807                                                                                                                                                                         | LOC360807                  | 1.6 | 0.005789486 | 0.032008559 |
| 1370972_x_at | RT1 class I, CE5                                                                                                                                                                  | RT1-CE5                    | 1.6 | 0.005792578 | 0.032014891 |
| 1393224_at   | Transcribed locus                                                                                                                                                                 | ---                        | 1.4 | 0.005815851 | 0.032121934 |
| 1384452_at   | zinc finger, CCHC domain containing 7 (predicted)                                                                                                                                 | Zcchc7_predicted           | 2.6 | 0.005821433 | 0.032141723 |
| 1389546_at   | ---                                                                                                                                                                               | ---                        | 1.6 | 0.005829124 | 0.032162844 |
| 1375526_at   | similar to novel protein of unknown function (DUF423) family member (predicted)                                                                                                   | RGD1563438_predicted       | 1.9 | 0.005893589 | 0.032464083 |
| 1389020_at   | similar to immunoglobulin superfamily containing leucine-rich repeat                                                                                                              | LOC686539                  | 1.7 | 0.005899024 | 0.032472269 |
| 1374694_at   | similar to Ankyrin repeat domain protein 28 (predicted)                                                                                                                           | RGD1559931_predicted       | 1.4 | 0.005906012 | 0.032498842 |
| 1383239_at   | zinc finger, CCHC domain containing 7 (predicted)                                                                                                                                 | Zcchc7_predicted           | 1.6 | 0.005908572 | 0.032498842 |
| 1397473_at   | distrobrein binding protein 1                                                                                                                                                     | Dtnbp1                     | 1.6 | 0.005911106 | 0.032498842 |
| 1382005_at   | Transcribed locus                                                                                                                                                                 | ---                        | 1.3 | 0.005919601 | 0.032531103 |
| 1381584_at   | Calsyntenin 2                                                                                                                                                                     | Clstn2                     | 1.8 | 0.005927608 | 0.032550322 |

|              |                                                                                                                                                                |                         |     |             |             |
|--------------|----------------------------------------------------------------------------------------------------------------------------------------------------------------|-------------------------|-----|-------------|-------------|
| 1373676_at   | Transcribed locus                                                                                                                                              | ---                     | 1.5 | 0.005980361 | 0.032777398 |
| 1382330_at   | development and differentiation enhancing factor 2 (predicted)                                                                                                 | Ddef2_predicted         | 2.0 | 0.005995144 | 0.03280805  |
| 1372748_at   | TBC1 domain family, member 2B                                                                                                                                  | Tbc1d2b                 | 1.3 | 0.005995926 | 0.03280805  |
| 1370822_at   | RT1 class II, locus Ba                                                                                                                                         | RT1-Ba                  | 2.8 | 0.006000791 | 0.032822259 |
| 1370965_at   | transcription factor 8                                                                                                                                         | Tcf8                    | 1.5 | 0.006002514 | 0.032822259 |
| 1379715_at   | similar to CG9346-PA (predicted)                                                                                                                               | RGD1307882_predicted    | 1.6 | 0.006028363 | 0.032926481 |
| 1388439_at   | similar to 65kDa FK506-binding protein                                                                                                                         | LOC360627               | 1.6 | 0.006029582 | 0.032926481 |
| 1394714_at   | ATPase, Ca <sup>++</sup> transporting, plasma membrane 1                                                                                                       | Atp2b1                  | 1.9 | 0.006038886 | 0.032961143 |
| 1378062_at   | Rho guanine nucleotide exchange factor (GEF) 12                                                                                                                | Arhgef12                | 1.7 | 0.006041385 | 0.032961143 |
| 1375378_at   | similar to quaking homolog, KH domain RNA binding isoform HQK-6 /// similar to quaking homolog, KH domain RNA binding isoform HQK-5                            | LOC499022 /// LOC684079 | 1.6 | 0.006047101 | 0.032967372 |
| 1373200_at   | eukaryotic translation elongation factor 1 epsilon 1 (predicted)                                                                                               | Eef1e1_predicted        | 1.4 | 0.006047398 | 0.032967372 |
| 1382695_at   | Hypothetical protein LOC690329                                                                                                                                 | LOC690329               | 1.7 | 0.006049096 | 0.032967372 |
| 1387666_at   | G protein-coupled receptor 85                                                                                                                                  | Gpr85                   | 2.0 | 0.006094306 | 0.033154016 |
| 1392905_at   | Guanine nucleotide binding protein, gamma 2                                                                                                                    | Gng2                    | 1.3 | 0.006095437 | 0.033154016 |
| 1374938_at   | ZW10 homolog, centromere/kinetochore protein (Drosophila)                                                                                                      | Zw10                    | 1.3 | 0.006128465 | 0.033278637 |
| 1397881_at   | similar to hypothetical protein (predicted)                                                                                                                    | RGD1306694_predicted    | 1.8 | 0.006147736 | 0.033360263 |
| 1375054_at   | Far upstream element (FUSE) binding protein 1                                                                                                                  | Fubp1                   | 1.7 | 0.006149581 | 0.033360263 |
| 1397203_at   | PRP4 pre-mRNA processing factor 4 homolog B (yeast)                                                                                                            | Prpf4b                  | 2.2 | 0.00615349  | 0.033363957 |
| 1371815_at   | microfibrillar-associated protein 2 (predicted)                                                                                                                | Mfap2_predicted         | 1.3 | 0.006154319 | 0.033363957 |
| 1393134_at   | Transcribed locus                                                                                                                                              | ---                     | 1.4 | 0.006172435 | 0.033440121 |
| 1377670_at   | cleavage and polyadenylation factor subunit homolog (S. cerevisiae) (predicted)                                                                                | Pcf11_predicted         | 1.6 | 0.006177056 | 0.033454136 |
| 1387348_at   | insulin-like growth factor binding protein 5                                                                                                                   | Igfbp5                  | 1.8 | 0.006210865 | 0.033626173 |
| 1388725_at   | leptin receptor overlapping transcript                                                                                                                         | Leprot                  | 1.4 | 0.006216844 | 0.033647465 |
| 1371301_at   | ribosomal protein L9                                                                                                                                           | Rpl9                    | 1.4 | 0.006229657 | 0.033705726 |
| 1373864_at   | mitogen-activated protein kinase kinase kinase kinase 4 (predicted)                                                                                            | Map4k4_predicted        | 1.7 | 0.006233462 | 0.033709733 |
| 1389064_at   | Transcribed locus                                                                                                                                              | ---                     | 1.6 | 0.006234497 | 0.033709733 |
| 1370875_at   | villin 2                                                                                                                                                       | Vil2                    | 1.5 | 0.006253388 | 0.033800764 |
| 1393091_at   | ---                                                                                                                                                            | ---                     | 1.4 | 0.006259463 | 0.033820643 |
| 1373998_at   | Transcribed locus                                                                                                                                              | ---                     | 1.4 | 0.006271142 | 0.033861157 |
| 1381847_at   | Similar to BC021442 protein (predicted)                                                                                                                        | RGD1561413_predicted    | 1.5 | 0.006302884 | 0.033978968 |
| 1370301_at   | matrix metalloproteinase 2                                                                                                                                     | Mmp2                    | 2.3 | 0.006307191 | 0.033980487 |
| 1379902_at   | Transcribed locus                                                                                                                                              | ---                     | 2.1 | 0.006308997 | 0.033980487 |
| 1371879_at   | leucine rich repeat containing 42                                                                                                                              | Lrrc42                  | 1.3 | 0.006327014 | 0.03405325  |
| 1392025_x_at | Transcribed locus                                                                                                                                              | ---                     | 1.4 | 0.006333071 | 0.034063557 |
| 1393231_at   | protein phosphatase 4, regulatory subunit 2 (predicted)                                                                                                        | Ppp4r2_predicted        | 1.4 | 0.006337136 | 0.034065854 |
| 1379748_at   | Similar to histocompatibility 28                                                                                                                               | LOC310968               | 3.6 | 0.006343413 | 0.034066009 |
| 1367515_at   | CCR4-NOT transcription complex, subunit 7 (predicted)                                                                                                          | Cnot7_predicted         | 1.7 | 0.006343883 | 0.034066009 |
| 1374458_at   | Transcribed locus, weakly similar to XP_342571.3 similar to Serine/threonine-protein kinase Sgk2 (Serum/glucocorticoid-regulated kinase 2) [Rattus norvegicus] | ---                     | 1.5 | 0.006353615 | 0.034107135 |
| 1371688_at   | translocation associated membrane protein 1                                                                                                                    | Tram1                   | 1.4 | 0.006377263 | 0.034210938 |
| 1370042_at   | stathmin-like 2                                                                                                                                                | Stmn2                   | 1.5 | 0.006394006 | 0.034262561 |
| 1391333_at   | ---                                                                                                                                                            | ---                     | 1.5 | 0.006395067 | 0.034262561 |
| 1384743_at   | Transcribed locus                                                                                                                                              | ---                     | 1.5 | 0.006450273 | 0.034493089 |
| 1389352_at   | Transcribed locus                                                                                                                                              | ---                     | 1.4 | 0.006450677 | 0.034493089 |

|              |                                                                                                                      |                                      |     |             |             |
|--------------|----------------------------------------------------------------------------------------------------------------------|--------------------------------------|-----|-------------|-------------|
| 1388684_at   | formin binding protein 4                                                                                             | Fnbp4                                | 1.4 | 0.006456182 | 0.034500089 |
| 1390406_at   | Rho GTPase activating protein 18 (predicted)                                                                         | Arhgap18_predicted                   | 1.4 | 0.006463079 | 0.034505269 |
| 1395376_at   | DEAD/H (Asp-Glu-Ala-Asp/His) box polypeptide 11 (CHL1-like helicase homolog, <i>S. cerevisiae</i> ) (predicted)      | Ddx11_predicted                      | 1.4 | 0.006463444 | 0.034505269 |
| 1398840_at   | vesicle-associated membrane protein 5                                                                                | Vamp5                                | 1.6 | 0.006473299 | 0.034511885 |
| 1381902_at   | Transcribed locus                                                                                                    | ---                                  | 1.7 | 0.006473077 | 0.034511885 |
| 1374548_at   | AF4/FMR2 family, member 4 (predicted)                                                                                | Aff4_predicted                       | 1.4 | 0.006476791 | 0.034515186 |
| 1372615_at   | amine oxidase, copper containing 3                                                                                   | Aoc3                                 | 1.9 | 0.006477893 | 0.034515186 |
| 1371926_at   | Interleukin 6 signal transducer                                                                                      | Il6st                                | 1.3 | 0.006493615 | 0.034576555 |
| 1373668_at   | polymerase (RNA) II (DNA directed) polypeptide I (predicted)                                                         | Polr2i_predicted                     | 1.3 | 0.006518392 | 0.034674809 |
| 1375269_at   | similar to Putative deoxyribose-phosphate aldolase (Phosphodeoxyriboaldolase) (Deoxyriboaldolase) (DERA)             | LOC686184                            | 1.4 | 0.006526407 | 0.034691842 |
| 1399114_at   | general transcription factor II E, polypeptide 2 (beta subunit) (predicted)                                          | Gtf2e2_predicted                     | 1.4 | 0.006528835 | 0.034691842 |
| 1387296_at   | cytochrome P450, family 2, subfamily J, polypeptide 4                                                                | Cyp2j4                               | 1.4 | 0.006530031 | 0.034691842 |
| 1389700_at   | ---                                                                                                                  | ---                                  | 1.9 | 0.006534931 | 0.03470388  |
| 1373085_at   | carbonyl reductase 3 (predicted)                                                                                     | Cbr3_predicted                       | 1.7 | 0.00653733  | 0.03470388  |
| 1386895_at   | melanoma antigen, family D, 1                                                                                        | Maged1                               | 1.4 | 0.006538626 | 0.03470388  |
| 1389405_at   | similar to chromodomain helicase DNA binding protein 9                                                               | LOC680231 ///<br>LOC682690           | 1.4 | 0.006542287 | 0.034712109 |
| 1390432_at   | transmembrane and coiled-coil domains 3 (predicted)                                                                  | Tmco3_predicted                      | 1.3 | 0.006547117 | 0.034726533 |
| 1398308_at   | replication protein A3 (predicted)                                                                                   | Rpa3_predicted                       | 1.6 | 0.006560251 | 0.034768473 |
| 1383127_at   | a disintegrin and metalloprotease domain 10                                                                          | Adam10                               | 1.5 | 0.006562492 | 0.034768473 |
| 1389634_at   | methionyl aminopeptidase 1 (predicted)                                                                               | Metap1_predicted                     | 1.3 | 0.006563479 | 0.034768473 |
| 1397349_at   | UBX domain containing 6 (predicted)                                                                                  | Ubx6_predicted                       | 1.4 | 0.00657678  | 0.034801664 |
| 1391862_at   | Transcribed locus                                                                                                    | ---                                  | 1.6 | 0.006581801 | 0.034809476 |
| 1380130_at   | ---                                                                                                                  | ---                                  | 1.7 | 0.006598558 | 0.034867387 |
| 1370357_at   | solute carrier family 30 (zinc transporter), member 4                                                                | Slc30a4                              | 1.4 | 0.006600237 | 0.034867387 |
| 1371880_at   | Sp1 transcription factor                                                                                             | Sp1                                  | 1.3 | 0.006601231 | 0.034867387 |
| 1385475_a_at | stimulated by retinoic acid gene 6 homolog (mouse)                                                                   | Stra6                                | 2.6 | 0.006605591 | 0.034879217 |
| 1396422_at   | Transcribed locus                                                                                                    | ---                                  | 2.4 | 0.006609512 | 0.034888721 |
| 1393162_at   | solute carrier family 39 (metal ion transporter), member 6                                                           | Slc39a6                              | 1.5 | 0.006654032 | 0.035078692 |
| 1393735_at   | Glutamine and serine rich 1 (predicted)                                                                              | Qser1_predicted                      | 1.8 | 0.006660433 | 0.035089007 |
| 1371340_at   | ribosomal protein, large P2 /// hypothetical gene supported by X15098 /// similar to 60S acidic ribosomal protein P2 | LOC363929 ///<br>LOC498555 /// Rplp2 | 1.3 | 0.006662389 | 0.035089007 |
| 1389989_at   | alpha thalassemia/mental retardation syndrome X-linked homolog (human)                                               | Atrx                                 | 2.0 | 0.006696867 | 0.0352417   |
| 1390147_at   | similar to mKIAA1429 protein (predicted)                                                                             | RGD1559904_predicted                 | 1.3 | 0.006697809 | 0.0352417   |
| 1373764_at   | zinc finger, matrin-like (predicted)                                                                                 | Zfml_predicted                       | 1.5 | 0.006737149 | 0.035403397 |
| 1377946_at   | Transcribed locus                                                                                                    | ---                                  | 2.1 | 0.006746843 | 0.035431694 |
| 1372510_at   | Sulfiredoxin 1 homolog ( <i>S. cerevisiae</i> )                                                                      | Srxn1                                | 1.4 | 0.006752641 | 0.03544132  |
| 1377322_at   | Transcribed locus                                                                                                    | ---                                  | 1.4 | 0.006752985 | 0.03544132  |
| 1392813_at   | SRY-box containing gene 9                                                                                            | Sox9                                 | 1.6 | 0.006769915 | 0.035507516 |
| 1367652_at   | insulin-like growth factor binding protein 3                                                                         | Igfbp3                               | 3.8 | 0.006779999 | 0.035549069 |
| 1373443_a_at | ankyrin repeat, family A (RFXANK-like), 2                                                                            | Ankra2                               | 1.4 | 0.006790541 | 0.035570324 |
| 1393236_at   | Transcribed locus                                                                                                    | ---                                  | 1.4 | 0.006799188 | 0.035581624 |
| 1382199_at   | Microtubule-associated protein 1 light chain 3 beta                                                                  | Map1lc3b                             | 1.9 | 0.006808458 | 0.035605435 |
| 1383452_at   | Transcribed locus                                                                                                    | ---                                  | 1.5 | 0.006810232 | 0.035605435 |
| 1378668_at   | Transcribed locus                                                                                                    | ---                                  | 1.6 | 0.006816029 | 0.035621401 |
| 1384699_at   | Transcribed locus                                                                                                    | ---                                  | 1.9 | 0.006817617 | 0.035621401 |
| 1371908_at   | NTF2-related export protein 1 (predicted)                                                                            | Nxt1_predicted                       | 1.3 | 0.006822659 | 0.035631654 |

|            |                                                                                                                                                      |                            |     |             |             |
|------------|------------------------------------------------------------------------------------------------------------------------------------------------------|----------------------------|-----|-------------|-------------|
| 1390028_at | dual-specificity tyrosine-(Y)-phosphorylation regulated kinase 2 (predicted)                                                                         | Dyrk2_predicted            | 1.4 | 0.006827982 | 0.035631654 |
| 1389202_at | similar to Ribulose-5-phosphate-3-epimerase                                                                                                          | MGC124653                  | 1.4 | 0.006832392 | 0.035631654 |
| 1376896_at | similar to RIKEN cDNA 1810074P20 (predicted)                                                                                                         | RGD1309308_predicted       | 1.8 | 0.006832578 | 0.035631654 |
| 1377619_at | WD repeat domain 36 (predicted)                                                                                                                      | Wdr36_predicted            | 1.9 | 0.006842871 | 0.035670832 |
| 1383112_at | trichorhinophalangeal syndrome I (predicted)                                                                                                         | Trps1_predicted            | 2.3 | 0.006850161 | 0.035678102 |
| 1388416_at | low density lipoprotein receptor-related protein 1                                                                                                   | Lrp1                       | 1.5 | 0.006859695 | 0.03571645  |
| 1384186_at | similar to mKIAA0212 protein (predicted)                                                                                                             | RGD1563633_predicted       | 1.4 | 0.006908293 | 0.035923995 |
| 1374812_at | similar to protein Tyr phosphatase                                                                                                                   | LOC498331                  | 1.7 | 0.006911417 | 0.035927296 |
| 1372757_at | signal transducer and activator of transcription 1                                                                                                   | Stat1                      | 1.6 | 0.00691548  | 0.035927296 |
| 1377042_at | similar to polycomb group ring finger 5                                                                                                              | LOC681178 ///<br>LOC687730 | 1.7 | 0.006918665 | 0.035932494 |
| 1371623_at | similar to CG7224-PA, isoform A /// hypothetical protein LOC685888                                                                                   | LOC684207 ///<br>LOC685888 | 1.6 | 0.006925883 | 0.035952069 |
| 1374225_at | similar to chromosome 14 open reading frame 145                                                                                                      | LOC500700                  | 1.5 | 0.006926806 | 0.035952069 |
| 1387247_at | proprotein convertase subtilisin/kexin type 1                                                                                                        | Pcsk1                      | 1.5 | 0.006939485 | 0.035983648 |
| 1398588_at | similar to step II splicing factor SLU7; DNA segment, Chr 11, ERATO Doi 730, expressed; DNA segment, Chr 3, Brigham & Womens Genetics 0878 expressed | LOC303057                  | 1.7 | 0.00694345  | 0.035983648 |
| 1387227_at | Wiskott-Aldrich syndrome protein interacting protein                                                                                                 | Waspip                     | 1.3 | 0.006981869 | 0.036157992 |
| 1382905_at | Collagen-binding factor Endo180                                                                                                                      | Endo180                    | 1.5 | 0.007000575 | 0.036230857 |
| 1392898_at | Transcribed locus                                                                                                                                    | ---                        | 1.5 | 0.007004556 | 0.036230857 |
| 1373206_at | fibronectin type III domain containing 3B (predicted)                                                                                                | Fndc3b_predicted           | 1.3 | 0.00700475  | 0.036230857 |
| 1373430_at | bromodomain adjacent to zinc finger domain, 2B (predicted)                                                                                           | Baz2b_predicted            | 1.5 | 0.00702912  | 0.036334057 |
| 1371518_at | Nidogen 1                                                                                                                                            | Nid1                       | 1.6 | 0.007052263 | 0.036394374 |
| 1371411_at | plexin B2                                                                                                                                            | Plexb2                     | 1.3 | 0.007052667 | 0.036394374 |
| 1370387_at | cytochrome P450, family 3, subfamily a, polypeptide 13                                                                                               | Cyp3a13                    | 1.8 | 0.007056278 | 0.036394374 |
| 1377726_at | tripartite motif protein 25                                                                                                                          | Trim25                     | 1.6 | 0.007061599 | 0.03639899  |
| 1375726_at | LIM domain only protein 7                                                                                                                            | LMO7                       | 1.5 | 0.00706847  | 0.036422993 |
| 1393240_at | EGF-containing fibulin-like extracellular matrix protein 2                                                                                           | Efemp2                     | 1.6 | 0.007090561 | 0.036513949 |
| 1378973_at | Transcribed locus                                                                                                                                    | ---                        | 1.4 | 0.007106642 | 0.036585303 |
| 1367682_at | midkine                                                                                                                                              | Mdk                        | 1.4 | 0.007110313 | 0.036592751 |
| 1389907_at | zinc finger and BTB domain containing 8 opposite strand (predicted)                                                                                  | Zbtb8os_predicted          | 1.4 | 0.00713388  | 0.036691077 |
| 1389527_at | promethin                                                                                                                                            | LOC378467                  | 1.8 | 0.007140092 | 0.036709105 |
| 1399034_at | pecanex homolog (Drosophila)                                                                                                                         | Pcnx                       | 1.6 | 0.007151553 | 0.036716103 |
| 1383110_at | kelch-like 24 (Drosophila)                                                                                                                           | Klhl24                     | 2.1 | 0.007177156 | 0.036798584 |
| 1378012_at | synaptonemal complex protein SC65                                                                                                                    | Sc65                       | 2.0 | 0.0071803   | 0.036803233 |
| 1397380_at | PX domain containing serine/threonine kinase                                                                                                         | Pxk                        | 1.7 | 0.007184628 | 0.036813944 |
| 1370000_at | nucleobindin 2                                                                                                                                       | Nucb2                      | 1.7 | 0.007206928 | 0.036882251 |
| 1386911_at | ATPase, Na <sup>+</sup> /K <sup>+</sup> transporting, alpha 2 polypeptide                                                                            | Atp1a2                     | 1.4 | 0.007231008 | 0.036993971 |
| 1388752_at | CDNA clone IMAGE:7370517                                                                                                                             | ---                        | 1.7 | 0.007239754 | 0.037023131 |
| 1383005_at | Transcribed locus                                                                                                                                    | ---                        | 1.5 | 0.007241209 | 0.037023131 |
| 1370189_at | splicing factor, arginine/serine-rich 10 (transformer 2 homolog, Drosophila)                                                                         | Sfrs10                     | 1.3 | 0.007251893 | 0.03706623  |
| 1376597_at | zinc finger, CCHC domain containing 10                                                                                                               | Zcchc10                    | 1.6 | 0.007273578 | 0.03715398  |
| 1372274_at | myeloid/lymphoid or mixed-lineage leukemia 5 (trithorax homolog, Drosophila)                                                                         | Mll5                       | 2.0 | 0.007279088 | 0.03717058  |

|              |                                                                                                          |                                    |     |             |             |
|--------------|----------------------------------------------------------------------------------------------------------|------------------------------------|-----|-------------|-------------|
| 1385118_at   | eukaryotic translation initiation factor 2, subunit 1 alpha /// hypothetical gene supported by NM_019356 | Eif2s1 /// LOC364604 /// LOC364984 | 1.4 | 0.007308514 | 0.037274554 |
| 1378040_at   | similar to Carbohydrate sulfotransferase D4ST1 (Dermatan 4-sulfotransferase 1) (D4ST-1)                  | LOC687718 /// LOC691394            | 1.5 | 0.00732885  | 0.037361399 |
| 1393891_at   | procollagen, type VIII, alpha 1 (predicted)                                                              | Col8a1_predicted                   | 2.7 | 0.007334501 | 0.037372329 |
| 1395966_at   | potassium channel tetramerisation domain containing 14 (predicted)                                       | Kctd14_predicted                   | 1.6 | 0.007373579 | 0.037524947 |
| 1376782_at   | CDC14 cell division cycle 14 homolog A ( <i>S. cerevisiae</i> ) (predicted)                              | Cdc14a_predicted                   | 1.4 | 0.007392815 | 0.037610968 |
| 1374738_at   | serologically defined colon cancer antigen 10                                                            | Sdccag10                           | 1.5 | 0.007395055 | 0.037610968 |
| 1382194_at   | Coagulation factor VIII                                                                                  | F8                                 | 2.3 | 0.007420449 | 0.037705144 |
| 1398695_at   | Amyloid beta (A4) precursor protein                                                                      | App                                | 2.2 | 0.007445836 | 0.03780489  |
| 1383625_a_at | similar to zinc finger protein (predicted)                                                               | RGD1562173_predicted               | 1.5 | 0.007446373 | 0.03780489  |
| 1372478_at   | similar to chemokine-like factor super family 7                                                          | LOC501065                          | 1.5 | 0.007451069 | 0.037814003 |
| 1393242_at   | similar to chromosome 16 open reading frame 33; minus -99 protein (predicted)                            | RGD1310922_predicted               | 1.5 | 0.007463096 | 0.037828355 |
| 1368817_at   | proteasome (prosome, macropain) activator subunit 4                                                      | Psme4                              | 1.4 | 0.007470742 | 0.037843783 |
| 1396775_at   | Transcribed locus                                                                                        | ---                                | 2.5 | 0.007499311 | 0.037950782 |
| 1370445_at   | phosphatidylserine-specific phospholipase A1                                                             | Pspla1                             | 1.8 | 0.00750197  | 0.037950782 |
| 1374362_at   | similar to 4930566A11Rik protein (predicted)                                                             | RGD1306674_predicted               | 1.4 | 0.007503608 | 0.037950782 |
| 1375898_at   | similar to RNA binding protein gene with multiple splicing (predicted)                                   | RGD1561067_predicted               | 1.8 | 0.007504725 | 0.037950782 |
| 1371529_at   | receptor (TNFRSF)-interacting serine-threonine kinase 1 (predicted)                                      | Ripk1_predicted                    | 1.6 | 0.007505709 | 0.037950782 |
| 1390723_at   | Catenin (cadherin-associated protein), alpha 1                                                           | Catna1                             | 1.6 | 0.007565248 | 0.038228328 |
| 1372109_at   | ---                                                                                                      | ---                                | 1.4 | 0.007569284 | 0.038230053 |
| 1388931_at   | mitochondrial ribosomal protein L13                                                                      | Mrpl13                             | 1.3 | 0.007570239 | 0.038230053 |
| 1384840_at   | Paired related homeobox 1                                                                                | Prrx1                              | 1.6 | 0.007606922 | 0.038379955 |
| 1374156_at   | membrane protein, palmitoylated 5 (MAGUK p55 subfamily member 5) (predicted)                             | Mpp5_predicted                     | 1.7 | 0.007615478 | 0.038411143 |
| 1376047_at   | 3'-phosphoadenosine 5'-phosphosulfate synthase 2 (predicted)                                             | Papss2_predicted                   | 1.7 | 0.007617774 | 0.038411143 |
| 1376339_at   | ---                                                                                                      | ---                                | 1.3 | 0.007620803 | 0.038414641 |
| 1371813_at   | HIRA interacting protein 3                                                                               | Hirip3                             | 1.6 | 0.007627544 | 0.038428111 |
| 1383853_at   | dual-specificity tyrosine-(Y)-phosphorylation regulated kinase 3                                         | Dyrk3                              | 1.6 | 0.007628148 | 0.038428111 |
| 1377846_a_at | ---                                                                                                      | ---                                | 1.4 | 0.007651122 | 0.038501439 |
| 1391463_at   | DEAD (Asp-Glu-Ala-Asp) box polypeptide 58 (predicted)                                                    | Ddx58_predicted                    | 4.1 | 0.007653158 | 0.038501439 |
| 1385408_at   | similar to mKIAA0518 protein (predicted)                                                                 | RGD1561597_predicted               | 1.5 | 0.007678549 | 0.038587466 |
| 1372013_at   | interferon induced transmembrane protein 1 (predicted)                                                   | Ifitm1_predicted                   | 2.0 | 0.007685538 | 0.038607162 |
| 1395351_at   | Dynein-like protein 2                                                                                    | DLP2                               | 1.7 | 0.007703138 | 0.038663782 |
| 1384327_at   | differentially expressed in FDCP 8                                                                       | Def8                               | 1.4 | 0.007764001 | 0.038921761 |
| 1390543_at   | Transcribed locus                                                                                        | ---                                | 1.6 | 0.007794104 | 0.039036975 |
| 1391643_at   | ---                                                                                                      | ---                                | 1.5 | 0.007799096 | 0.039044564 |
| 1378210_at   | myeloid/lymphoid or mixed-lineage leukemia                                                               | Mll                                | 1.4 | 0.007802741 | 0.039044564 |
| 1379485_at   | eukaryotic translation initiation factor 3, subunit 10 (theta)                                           | Eif3s10                            | 1.5 | 0.007821188 | 0.039124972 |
| 1384282_at   | zinc finger proliferation 1                                                                              | Zipro1                             | 1.4 | 0.007824498 | 0.039129626 |
| 1368186_a_at | spleen tyrosine kinase                                                                                   | Syk                                | 1.4 | 0.007830213 | 0.039142381 |
| 1381757_at   | hypothetical LOC305552 (predicted)                                                                       | RGD1309501_predicted               | 1.4 | 0.007835692 | 0.039142381 |
| 1388313_at   | ribosomal protein s25                                                                                    | Rps25                              | 2.2 | 0.007837362 | 0.039142381 |
| 1373540_at   | heterogeneous nuclear ribonucleoprotein A2/B1 (predicted)                                                | Hnrpa2b1_predicted                 | 1.5 | 0.007838947 | 0.039142381 |

|              |                                                                                                                                                  |                                                              |     |             |             |
|--------------|--------------------------------------------------------------------------------------------------------------------------------------------------|--------------------------------------------------------------|-----|-------------|-------------|
| 1393798_at   | alpha thalassemia/mental retardation syndrome X-linked homolog (human)                                                                           | Atrx                                                         | 2.9 | 0.007890653 | 0.039352776 |
| 1382077_at   | Transcribed locus                                                                                                                                | ---                                                          | 1.3 | 0.007909848 | 0.039424599 |
| 1381619_at   | A kinase (PRKA) anchor protein 5                                                                                                                 | Akap5                                                        | 2.2 | 0.007912814 | 0.039427435 |
| 1399028_at   | CDNA clone IMAGE:7367808                                                                                                                         | ---                                                          | 1.3 | 0.007918863 | 0.039445624 |
| 1390659_at   | Transcribed locus                                                                                                                                | ---                                                          | 1.6 | 0.007938827 | 0.039521134 |
| 1373372_at   | similar to lymphocyte antigen 6 complex, locus E ligand                                                                                          | LOC501282                                                    | 1.3 | 0.007980612 | 0.039657132 |
| 1392605_at   | Transcribed locus                                                                                                                                | ---                                                          | 2.0 | 0.008001009 | 0.039720606 |
| 1389005_at   | ---                                                                                                                                              | ---                                                          | 1.3 | 0.008004426 | 0.039720606 |
| 1381510_at   | Transcribed locus                                                                                                                                | ---                                                          | 1.5 | 0.008009884 | 0.039730572 |
| 1375246_at   | hypothetical protein LOC679388 ///<br>hypothetical protein LOC679747 ///<br>hypothetical protein LOC685117 ///<br>hypothetical protein LOC686398 | LOC679388 ///<br>LOC679747 ///<br>LOC685117 ///<br>LOC686398 | 1.3 | 0.008021276 | 0.039763092 |
| 1372293_at   | Transcribed locus                                                                                                                                | ---                                                          | 1.4 | 0.008032946 | 0.039806117 |
| 1398754_at   | ubiquitin A-52 residue ribosomal protein fusion product 1                                                                                        | Uba52                                                        | 1.3 | 0.008037077 | 0.039806117 |
| 1371871_at   | RAB12, member RAS oncogene family                                                                                                                | Rab12                                                        | 1.9 | 0.008037215 | 0.039806117 |
| 1370062_at   | hypoxia induced gene 1                                                                                                                           | Hig1                                                         | 1.3 | 0.008052502 | 0.039869822 |
| 1374519_at   | ---                                                                                                                                              | ---                                                          | 1.4 | 0.008085838 | 0.039974712 |
| 1373576_at   | ---                                                                                                                                              | ---                                                          | 1.4 | 0.008097486 | 0.040010982 |
| 1398595_at   | RNA binding motif protein 5                                                                                                                      | Rbm5                                                         | 1.7 | 0.008106689 | 0.040041687 |
| 1398884_at   | prefoldin 5 (predicted)                                                                                                                          | Pfdn5_predicted                                              | 1.7 | 0.008149913 | 0.040202018 |
| 1394784_at   | similar to chromosome 20 open reading frame 6                                                                                                    | RGD1306067                                                   | 1.8 | 0.00815137  | 0.040202018 |
| 1385177_at   | Similar to sorbin and SH3 domain containing 1 isoform 3                                                                                          | LOC686098                                                    | 1.7 | 0.008178444 | 0.040311007 |
| 1382135_at   | similar to CG9346-PA (predicted)                                                                                                                 | RGD1307882_predicted                                         | 1.5 | 0.008201725 | 0.040377359 |
| 1383137_at   | SRY-box containing gene 4 (predicted)                                                                                                            | Sox4_predicted                                               | 1.6 | 0.00821188  | 0.04040353  |
| 1370339_at   | ---                                                                                                                                              | ---                                                          | 1.4 | 0.008260769 | 0.040534945 |
| 1375308_at   | Transcribed locus                                                                                                                                | ---                                                          | 1.5 | 0.008297124 | 0.040664807 |
| 1376937_at   | similar to 4631422O05Rik protein (predicted)                                                                                                     | RGD1565927_predicted                                         | 1.5 | 0.008301508 | 0.040666938 |
| 1383311_at   | similar to cisplatin resistance associated                                                                                                       | LOC682257 ///<br>LOC689613                                   | 1.5 | 0.008307656 | 0.04068006  |
| 1395557_at   | Transcribed locus                                                                                                                                | ---                                                          | 1.7 | 0.008379701 | 0.04098806  |
| 1381489_at   | Transcribed locus                                                                                                                                | ---                                                          | 1.8 | 0.008387405 | 0.041009525 |
| 1372059_at   | similar to RIKEN cDNA 2610528E23                                                                                                                 | RGD1309437                                                   | 1.4 | 0.008395961 | 0.041039159 |
| 1393706_at   | six transmembrane epithelial antigen of the prostate 1 (predicted)                                                                               | Steap1_predicted                                             | 1.8 | 0.008415883 | 0.041075502 |
| 1388667_at   | mannosidase 2, alpha 1                                                                                                                           | Man2a1                                                       | 1.6 | 0.008435882 | 0.041132289 |
| 1389632_at   | Transcribed locus, strongly similar to XP_228131.4 similar to Rho-related BTB domain-containing protein 1 [Rattus norvegicus]                    | ---                                                          | 1.7 | 0.008440347 | 0.041133873 |
| 1384180_at   | interferon-induced protein with tetratricopeptide repeats 2                                                                                      | Ifit2                                                        | 4.0 | 0.008469098 | 0.041225133 |
| 1393214_at   | Similar to zinc finger protein 458                                                                                                               | LOC685865                                                    | 1.7 | 0.008477232 | 0.041252516 |
| 1385164_at   | Transcribed locus                                                                                                                                | ---                                                          | 1.7 | 0.008488187 | 0.041293612 |
| 1388615_at   | RAS-related protein 1a                                                                                                                           | Rap1a                                                        | 1.5 | 0.0085005   | 0.041330212 |
| 1388492_at   | TNFAIP3 interacting protein 1 (predicted)                                                                                                        | Tnip1_predicted                                              | 1.5 | 0.008501563 | 0.041330212 |
| 1380568_a_at | ---                                                                                                                                              | ---                                                          | 1.4 | 0.008520355 | 0.041401121 |
| 1395770_at   | Transcribed locus                                                                                                                                | ---                                                          | 1.7 | 0.008544056 | 0.041504028 |
| 1370968_at   | nuclear factor of kappa light chain gene enhancer in B-cells 1, p105                                                                             | Nfkb1                                                        | 1.5 | 0.008549385 | 0.041517652 |
| 1392330_at   | HemK methyltransferase family member 2 (predicted)                                                                                               | Hemk2_predicted                                              | 1.7 | 0.008560413 | 0.041554015 |
| 1391911_at   | ---                                                                                                                                              | ---                                                          | 1.7 | 0.008561926 | 0.041554015 |
| 1368593_at   | CD1d1 antigen                                                                                                                                    | Cd1d1                                                        | 1.3 | 0.008567906 | 0.041570772 |
| 1368358_a_at | protein tyrosine phosphatase, receptor type, R                                                                                                   | Ptpr                                                         | 1.5 | 0.008584267 | 0.041625594 |
| 1383237_at   | Transcribed locus                                                                                                                                | ---                                                          | 1.8 | 0.008598768 | 0.041643841 |
| 1377755_at   | activating signal cointegrator 1 complex subunit 3 (predicted)                                                                                   | Ascc3_predicted                                              | 1.4 | 0.00861586  | 0.041705023 |
| 1391431_at   | Transcribed locus                                                                                                                                | ---                                                          | 1.7 | 0.008629981 | 0.041761083 |
| 1373311_at   | PHD finger protein 3 (predicted)                                                                                                                 | Phf3_predicted                                               | 1.3 | 0.008641688 | 0.041793147 |

|                    |                                                                                                                              |                            |     |             |             |
|--------------------|------------------------------------------------------------------------------------------------------------------------------|----------------------------|-----|-------------|-------------|
| 1381065_at         | hypothetical protein LOC499120                                                                                               | LOC499120                  | 1.4 | 0.008658373 | 0.041860901 |
| 1398397_at         | Transcribed locus                                                                                                            | ---                        | 1.4 | 0.008677896 | 0.041920647 |
| 1388771_at         | CGG triplet repeat binding protein 1 (predicted)                                                                             | Cggbp1_predicted           | 1.4 | 0.008681796 | 0.041925478 |
| 1372273_at         | glycophorin C (Gerbich blood group)                                                                                          | Gypc                       | 2.0 | 0.008694299 | 0.041961216 |
| 1384562_at         | Transcribed locus                                                                                                            | ---                        | 2.5 | 0.008701688 | 0.041984558 |
| 1391876_at         | ---                                                                                                                          | ---                        | 1.7 | 0.008712918 | 0.042026416 |
| 1372829_at         | RNA binding motif protein 8 (predicted)                                                                                      | Rbm8_predicted             | 1.6 | 0.008728158 | 0.042075245 |
| 1390885_at         | Transcribed locus                                                                                                            | ---                        | 1.7 | 0.008752246 | 0.042129627 |
| 1374567_at         | proline/serine-rich coiled-coil 2                                                                                            | Psrc2                      | 1.3 | 0.008758806 | 0.042146595 |
| 1370282_at         | cysteine and glycine-rich protein 2                                                                                          | Csrp2                      | 3.0 | 0.008760895 | 0.042146595 |
| 1370167_at         | syndecan 2                                                                                                                   | Sdc2                       | 1.4 | 0.008765269 | 0.042155306 |
| 1373100_at         | similar to RIKEN cDNA 2900010J23                                                                                             | LOC499779                  | 1.4 | 0.00878855  | 0.042217895 |
| 1372250_at         | SCF apoptosis response protein 1                                                                                             | LOC499941                  | 1.2 | 0.008794067 | 0.04222337  |
| 1389258_at         | ring finger protein 138                                                                                                      | Rnf138                     | 1.4 | 0.008794824 | 0.04222337  |
| 1372372_at         | similar to Ab2-225                                                                                                           | RGD1306952                 | 1.3 | 0.008822423 | 0.042318814 |
| 1374876_at         | leptin receptor overlapping transcript-like 1                                                                                | Leprotl1                   | 1.3 | 0.008848246 | 0.042405526 |
| 1382512_at         | Transcribed locus                                                                                                            | ---                        | 1.4 | 0.008850813 | 0.042405526 |
| 1377657_at         | inhibitor of Bruton agammaglobulinemia tyrosine kinase (predicted)                                                           | Ibtk_predicted             | 1.4 | 0.008869024 | 0.042468038 |
| 1381447_at         | similar to RIKEN cDNA 9430015G10                                                                                             | RGD1311517                 | 1.5 | 0.008872697 | 0.042472133 |
| 1377883_at         | Transcribed locus                                                                                                            | ---                        | 1.7 | 0.008890361 | 0.042520692 |
| 1382913_at         | cortactin binding protein 2                                                                                                  | Cttnbp2                    | 1.6 | 0.008893338 | 0.042522566 |
| 1389468_at         | ribose 5-phosphate isomerase A (predicted)                                                                                   | Rpia_predicted             | 1.4 | 0.008899946 | 0.042541794 |
| AFFX_ratb1/X12957_ | ---                                                                                                                          | ---                        | 1.3 | 0.008905327 | 0.042555148 |
| 1379942_at         | similar to SOX2 protein (predicted)                                                                                          | RGD1565646_predict ed      | 1.8 | 0.008951679 | 0.042751807 |
| 1377118_at         | similar to KIAA1712 protein                                                                                                  | RGD1308517                 | 1.4 | 0.008963658 | 0.04278195  |
| 1380489_at         | Similar to RIKEN cDNA G430041M01 (predicted)                                                                                 | RGD1562563_predict ed      | 1.8 | 0.008965794 | 0.04278195  |
| 1374578_at         | Transcribed locus                                                                                                            | ---                        | 1.3 | 0.008978225 | 0.042812374 |
| 1373086_at         | similar to RIKEN cDNA F730014I05 (predicted)                                                                                 | RGD1310800_predict ed      | 1.6 | 0.00898114  | 0.042812374 |
| 1391150_at         | Wingless-related MMTV integration site 16                                                                                    | Wnt16                      | 2.0 | 0.008986369 | 0.042818018 |
| 1394654_at         | ---                                                                                                                          | ---                        | 1.6 | 0.009037297 | 0.043006154 |
| 1377778_at         | ischemia related factor vof-16                                                                                               | Vof16                      | 2.5 | 0.009038927 | 0.043006154 |
| 1392056_at         | PHD finger protein 3 (predicted)                                                                                             | Phf3_predicted             | 1.4 | 0.009071606 | 0.043099302 |
| 1378322_at         | Similar to APG4-D protein                                                                                                    | LOC686505                  | 1.5 | 0.009093067 | 0.043163855 |
| 1392049_at         | A kinase (PRKA) anchor protein 11                                                                                            | Akap11                     | 1.4 | 0.009117463 | 0.043208808 |
| 1372964_at         | AT rich interactive domain 5B (Mrf1 like) (predicted)                                                                        | Arid5b_predicted           | 1.8 | 0.009118298 | 0.043208808 |
| 1393987_s_at       | G protein-coupled receptor kinase 6                                                                                          | Gprk6                      | 1.5 | 0.009131619 | 0.043247011 |
| 1392729_at         | Transcribed locus                                                                                                            | ---                        | 1.3 | 0.00917186  | 0.043373062 |
| 1382939_at         | translocated promoter region                                                                                                 | Tpr                        | 1.8 | 0.009174057 | 0.043373062 |
| 1379542_at         | similar to Small nuclear ribonucleoprotein F (snRNP-F) (Sm protein F) (Sm-F) (SmF)                                           | LOC680737 ///<br>LOC687845 | 1.8 | 0.009185933 | 0.043394069 |
| 1386525_at         | THO complex 2 (predicted)                                                                                                    | Thoc2_predicted            | 1.9 | 0.009193168 | 0.043413504 |
| 1373878_at         | Rho-associated coiled-coil forming kinase 1                                                                                  | Rock1                      | 1.3 | 0.009219816 | 0.043514355 |
| 1382312_at         | AT rich interactive domain 5B (Mrf1 like) (predicted)                                                                        | Arid5b_predicted           | 2.2 | 0.009248392 | 0.043618941 |
| 1371186_at         | integrin, alpha 6                                                                                                            | Itga6                      | 1.7 | 0.009264019 | 0.043663038 |
| 1368173_at         | nucleolar protein 5                                                                                                          | Nol5                       | 2.3 | 0.009269193 | 0.043663038 |
| 1368012_at         | telomerase associated protein 1                                                                                              | Tep1                       | 1.4 | 0.009271969 | 0.043663038 |
| 1393191_at         | similar to RIKEN cDNA 2610200G18 (predicted)                                                                                 | RGD1561205_predict ed      | 1.9 | 0.009308301 | 0.043793746 |
| 1383228_at         | ---                                                                                                                          | ---                        | 2.1 | 0.009335044 | 0.043869372 |
| 1389379_at         | Transcribed locus                                                                                                            | ---                        | 1.4 | 0.009354962 | 0.04395042  |
| 1391415_at         | putative 28 kDa protein                                                                                                      | LOC289809                  | 1.4 | 0.009369522 | 0.04399369  |
| 1372168_s_at       | insulin-like growth factor binding protein 6                                                                                 | Igfbp6                     | 1.6 | 0.00937755  | 0.04401882  |
| 1379420_at         | similar to Dehydrogenase/reductase SDR family member 7 precursor (Retinal short-chain dehydrogenase/reductase 4) (predicted) | RGD1565002_predict ed      | 1.4 | 0.009397379 | 0.044086734 |

|              |                                                                                                                                               |                            |     |             |             |
|--------------|-----------------------------------------------------------------------------------------------------------------------------------------------|----------------------------|-----|-------------|-------------|
| 1399167_a_at | Transcribed locus, strongly similar to XP_341668.3 similar to growth factor receptor bound protein 2-associated protein 1 [Rattus norvegicus] | ---                        | 1.3 | 0.009432986 | 0.044193866 |
| 1395781_at   | v-myc myelocytomatosis viral oncogene homolog 1, lung carcinoma derived (avian)                                                               | Mycl1                      | 1.3 | 0.009435182 | 0.044193866 |
| 1380250_at   | insulin responsive sequence DNA binding protein-1                                                                                             | Sned1                      | 1.7 | 0.009502028 | 0.044422794 |
| 1391345_at   | BMP-binding endothelial regulator (predicted)                                                                                                 | Bmper_predicted            | 2.6 | 0.009531637 | 0.044500815 |
| 1389479_at   | Kruppel-like factor 3 (basic) (mapped)                                                                                                        | Klf3                       | 1.4 | 0.009538577 | 0.044520579 |
| 1373343_at   | Transcribed locus                                                                                                                             | ---                        | 1.6 | 0.009578262 | 0.044638549 |
| 1371910_at   | Transcribed locus                                                                                                                             | ---                        | 1.6 | 0.009580136 | 0.044638549 |
| 1371232_a_at | chondroitin sulfate proteoglycan 2                                                                                                            | Cspg2                      | 1.9 | 0.00958425  | 0.044645071 |
| 1379150_at   | Cytoplasmic FMR1 interacting protein 2 (predicted)                                                                                            | Cyfp12_predicted           | 2.6 | 0.009589039 | 0.044654734 |
| 1367485_at   | transcription elongation factor A (SII) 1                                                                                                     | Tcea1                      | 1.3 | 0.009606746 | 0.044705033 |
| 1372934_at   | similar to 1700019E19Rik protein (predicted)                                                                                                  | RGD1307392_predicted       | 1.4 | 0.009607994 | 0.044705033 |
| 1377333_at   | Transcribed locus                                                                                                                             | ---                        | 1.6 | 0.009636672 | 0.044825784 |
| 1383528_at   | similar to mKIAA0215 protein (predicted)                                                                                                      | RGD1563945_predicted       | 1.9 | 0.009648458 | 0.044867919 |
| 1391481_at   | Calpastatin                                                                                                                                   | Cast                       | 2.0 | 0.009686575 | 0.044998439 |
| 1381981_at   | Transcribed locus                                                                                                                             | ---                        | 1.7 | 0.009690164 | 0.044998439 |
| 1385275_at   | wingless-related MMTV integration site 16                                                                                                     | Wnt16                      | 1.6 | 0.009712599 | 0.045064269 |
| 1374966_at   | doublecortin                                                                                                                                  | Dcx                        | 1.5 | 0.009733259 | 0.045083819 |
| 1398947_at   | pumilio 2 (Drosophila)                                                                                                                        | Pum2                       | 1.3 | 0.009745841 | 0.045108804 |
| 1389126_at   | coiled-coil-helix-coiled-coil-helix domain containing 1 (predicted)                                                                           | Chchd1_predicted           | 1.4 | 0.00974688  | 0.045108804 |
| 1372835_at   | ras homolog gene family, member J                                                                                                             | Rhoj                       | 1.6 | 0.009762548 | 0.045155901 |
| 1372430_at   | similar to RIKEN cDNA 1700037H04                                                                                                              | RGD1311739                 | 1.4 | 0.009798606 | 0.045297211 |
| 1374531_at   | Transcribed locus                                                                                                                             | ---                        | 2.8 | 0.009801941 | 0.045299894 |
| 1388131_at   | tubulin, beta 2b                                                                                                                              | Tubb2b                     | 1.5 | 0.009827821 | 0.045388756 |
| 1379384_at   | Sp1 transcription factor                                                                                                                      | Sp1                        | 1.7 | 0.00985504  | 0.045481395 |
| 1384242_at   | Transcribed locus                                                                                                                             | ---                        | 1.4 | 0.009866902 | 0.045523368 |
| 1382023_at   | Transcribed locus                                                                                                                             | ---                        | 1.7 | 0.009872984 | 0.045531176 |
| 1388448_at   | Hypothetical protein LOC691031                                                                                                                | LOC691031                  | 1.7 | 0.009874131 | 0.045531176 |
| 1376206_at   | Transcribed locus                                                                                                                             | ---                        | 1.4 | 0.009883901 | 0.045551032 |
| 1383218_at   | ---                                                                                                                                           | ---                        | 1.5 | 0.009883976 | 0.045551032 |
| 1373059_at   | ankyrin repeat domain 13                                                                                                                      | Ankrd13                    | 1.5 | 0.009935465 | 0.045724265 |
| 1371977_at   | actin related protein 2/3 complex, subunit 3 (predicted)                                                                                      | Arpc3_predicted            | 1.4 | 0.009972372 | 0.045842812 |
| 1379583_at   | AFG3(ATPase family gene 3)-like 1 (yeast) (predicted)                                                                                         | Afg3l1_predicted           | 1.5 | 0.010013776 | 0.045981739 |
| 1387907_at   | inositol 1,4,5-triphosphate receptor 1                                                                                                        | Itpr1                      | 1.4 | 0.010029197 | 0.046037067 |
| 1390372_at   | Mitogen activated protein kinase kinase kinase 12                                                                                             | Map3k12                    | 1.4 | 0.010031423 | 0.046037067 |
| 1389913_at   | ---                                                                                                                                           | ---                        | 1.5 | 0.010039274 | 0.046060245 |
| 1395359_at   | Spectrin beta 2                                                                                                                               | Spnb2                      | 1.5 | 0.010059492 | 0.046140133 |
| 1374564_at   | deltex 2 homolog (Drosophila)                                                                                                                 | Dtx2                       | 1.4 | 0.010087751 | 0.046218199 |
| 1390914_at   | Friend leukemia integration 1                                                                                                                 | Fli1                       | 1.8 | 0.010091652 | 0.046223196 |
| 1381381_at   | Membrane associated DNA binding protein (predicted)                                                                                           | Mnab_predicted             | 1.7 | 0.010098906 | 0.04623828  |
| 1371720_at   | similar to mitochondrial ribosomal protein L20                                                                                                | LOC680747 ///<br>LOC687253 | 1.4 | 0.010135387 | 0.046358965 |
| 1373628_at   | Transcribed locus                                                                                                                             | ---                        | 3.1 | 0.010153252 | 0.046427768 |
| 1374432_at   | ---                                                                                                                                           | ---                        | 1.3 | 0.010167593 | 0.046477415 |
| 1391689_at   | similar to Retinoblastoma-binding protein 2 (RBBP-2)                                                                                          | LOC312678                  | 1.5 | 0.01016976  | 0.046477415 |
| 1395819_at   | Transcribed locus                                                                                                                             | ---                        | 3.0 | 0.01018666  | 0.046528792 |
| 1374709_at   | Transcribed locus                                                                                                                             | ---                        | 1.6 | 0.010226231 | 0.046657713 |
| 1373160_at   | similar to phosphatidic acid phosphatase type 2 domain containing 1A                                                                          | LOC680466 ///<br>LOC683534 | 1.4 | 0.010268697 | 0.046824736 |
| 1368712_at   | zinc finger protein 386 (Kruppel-like)                                                                                                        | Znf386                     | 1.7 | 0.010271379 | 0.046824736 |
| 1367978_at   | adenylate cyclase 2                                                                                                                           | Adcy2                      | 1.4 | 0.010276343 | 0.046826362 |
| 1369943_at   | transglutaminase 2, C polypeptide                                                                                                             | Tgm2                       | 1.7 | 0.01027743  | 0.046826362 |



|              |                                                                                                                                                      |                         |     |             |             |
|--------------|------------------------------------------------------------------------------------------------------------------------------------------------------|-------------------------|-----|-------------|-------------|
| 1388737_at   | similar to polybromo-1 (predicted)                                                                                                                   | RGD1565549_predicted    | 1.5 | 0.01028754  | 0.046859445 |
| 1372808_at   | similar to Bifunctional methylenetetrahydrofolate dehydrogenase/cyclohydrolase, mitochondrial precursor                                              | LOC680308 /// LOC684490 | 1.4 | 0.010324305 | 0.046964517 |
| 1383263_at   | osteoglycin (predicted)                                                                                                                              | Ogn_predicted           | 2.1 | 0.010324884 | 0.046964517 |
| 1384901_at   | Zinc finger protein 451                                                                                                                              | Zfp451                  | 1.3 | 0.010335441 | 0.046999541 |
| 1372549_at   | similar to RIKEN cDNA 2600017H02 (predicted)                                                                                                         | RGD1561781_predicted    | 1.6 | 0.010338643 | 0.047001107 |
| 1398131_at   | Glycoprotein m6b                                                                                                                                     | Gpm6b                   | 2.6 | 0.010348681 | 0.047033742 |
| 1395264_at   | similar to Rap1-interacting factor 1 (predicted)                                                                                                     | RGD1562474_predicted    | 2.1 | 0.010394668 | 0.047216652 |
| 1374036_at   | minichromosome maintenance deficient 2 mitotin (S. cerevisiae) (predicted)                                                                           | Mcm2_predicted          | 1.6 | 0.010429494 | 0.047328547 |
| 1396463_at   | similar to Pinin                                                                                                                                     | LOC368070               | 3.4 | 0.010433312 | 0.047328547 |
| 1374896_at   | Transcribed locus                                                                                                                                    | ---                     | 1.3 | 0.010433689 | 0.047328547 |
| 1371536_at   | calcium regulated heat stable protein 1                                                                                                              | Carhsp1                 | 1.4 | 0.01044765  | 0.047378811 |
| 1383602_at   | pumilio 1 (Drosophila) (predicted)                                                                                                                   | Pum1_predicted          | 1.7 | 0.010465701 | 0.047434511 |
| 1385199_a_at | RNA binding motif protein 34                                                                                                                         | Rbm34                   | 1.4 | 0.010506868 | 0.047594869 |
| 1372681_at   | ---                                                                                                                                                  | ---                     | 1.5 | 0.010515572 | 0.047621179 |
| 1370458_at   | hepatoma-derived growth factor, related protein 3                                                                                                    | Hdgrp3                  | 1.5 | 0.01052128  | 0.047633914 |
| 1378416_at   | Transcribed locus                                                                                                                                    | ---                     | 1.6 | 0.010542404 | 0.047716416 |
| 1390806_at   | similar to RIKEN cDNA B230118H07 (predicted)                                                                                                         | RGD1309730_predicted    | 1.6 | 0.010550075 | 0.047725196 |
| 1373632_at   | TAF9 RNA polymerase II, TATA box binding protein (TBP)-associated factor                                                                             | Taf9                    | 1.4 | 0.010550147 | 0.047725196 |
| 1374183_at   | similar to RIKEN cDNA 1810011O16 (predicted)                                                                                                         | RGD1309624_predicted    | 1.5 | 0.010594059 | 0.047835009 |
| 1395974_at   | similar to hypothetical protein (predicted)                                                                                                          | RGD1311334_predicted    | 1.4 | 0.010596014 | 0.047835009 |
| 1388843_at   | Transcribed locus                                                                                                                                    | ---                     | 1.4 | 0.010597417 | 0.047835009 |
| 1377237_at   | Transcribed locus                                                                                                                                    | ---                     | 1.3 | 0.010623084 | 0.0479244   |
| 1383455_at   | glutamyl-prolyl-tRNA synthetase                                                                                                                      | Eprs                    | 1.4 | 0.010628086 | 0.047925883 |
| 1395944_at   | Transcribed locus                                                                                                                                    | ---                     | 1.7 | 0.010658563 | 0.048035559 |
| 1374695_at   | chromobox homolog 1 (Drosophila HP1 beta) (predicted)                                                                                                | Cbx1_predicted          | 1.5 | 0.010672787 | 0.048068456 |
| 1383534_at   | Transcribed locus, weakly similar to XP_522567.1 similar to zinc finger protein 605 [Pan troglodytes]                                                | ---                     | 1.4 | 0.010679338 | 0.048084796 |
| 1375266_at   | ---                                                                                                                                                  | ---                     | 1.8 | 0.01069241  | 0.048130476 |
| 1391383_at   | cartilage acidic protein 1                                                                                                                           | Crtac1                  | 2.0 | 0.010699491 | 0.048149174 |
| 1384268_at   | similar to hypothetical protein FLJ40432 (predicted)                                                                                                 | RGD1310683_predicted    | 2.0 | 0.010710544 | 0.048159383 |
| 1378154_at   | Transcribed locus                                                                                                                                    | ---                     | 1.4 | 0.010729341 | 0.048217541 |
| 1397286_at   | Transcription factor 4                                                                                                                               | Tcf4                    | 1.7 | 0.010737185 | 0.048226438 |
| 1390698_at   | Transcribed locus                                                                                                                                    | ---                     | 1.3 | 0.010743836 | 0.048235169 |
| 1377310_at   | Transcribed locus                                                                                                                                    | ---                     | 2.1 | 0.010744994 | 0.048235169 |
| 1374007_at   | similar to step II splicing factor SLU7; DNA segment, Chr 11, ERATO Doi 730, expressed; DNA segment, Chr 3, Brigham & Womens Genetics 0878 expressed | LOC303057               | 1.6 | 0.010759017 | 0.048284943 |
| 1380101_at   | poly(A) polymerase gamma (predicted)                                                                                                                 | Papolg_predicted        | 1.4 | 0.010780796 | 0.048365525 |
| 1378347_at   | Transcribed locus                                                                                                                                    | ---                     | 1.7 | 0.010782854 | 0.048365525 |
| 1390414_at   | similar to hypothetical protein (predicted)                                                                                                          | RGD1308489_predicted    | 1.3 | 0.010787832 | 0.048374662 |
| 1398757_at   | nucleophosmin 1                                                                                                                                      | Npm1                    | 1.3 | 0.010804671 | 0.048436968 |
| 1394042_at   | ---                                                                                                                                                  | ---                     | 1.4 | 0.010823422 | 0.048494593 |
| 1371324_at   | similar to Splicing factor 3B subunit 5 (SF3b5) (Pre-mRNA splicing factor SF3b 10 kDa subunit)                                                       | LOC680891 /// LOC684491 | 1.5 | 0.010832363 | 0.048521436 |
| 1368885_at   | ectonucleoside triphosphate diphosphohydrolase 1                                                                                                     | Entpd1                  | 1.6 | 0.010850492 | 0.048589408 |
| 1382613_at   | Transcribed locus                                                                                                                                    | ---                     | 1.5 | 0.010859191 | 0.048615127 |
| 1373612_at   | Transcribed locus                                                                                                                                    | ---                     | 1.3 | 0.010879918 | 0.04865916  |
| 1383040_a_at | ---                                                                                                                                                  | ---                     | 2.4 | 0.010885854 | 0.048668261 |
| 1390234_at   | splicing factor 3b, subunit 1                                                                                                                        | Sf3b1                   | 1.3 | 0.01091001  | 0.048763    |

|              |                                                             |                      |     |             |             |
|--------------|-------------------------------------------------------------|----------------------|-----|-------------|-------------|
| 1377949_s_at | ---                                                         | ---                  | 1.6 | 0.010923792 | 0.048806649 |
| 1389485_at   | similar to transformed mouse 3T3 cell double minute 1       | LOC314859            | 1.4 | 0.010927417 | 0.048806649 |
| 1387264_at   | potassium channel, subfamily K, member 6                    | Kcnk6                | 2.1 | 0.010928678 | 0.048806649 |
| 1388616_at   | similar to RIKEN cDNA 2310042G06                            | MGC72955             | 1.4 | 0.010958197 | 0.048911922 |
| 1387543_at   | solute carrier family 5 (choline transporter), member 7     | Slc5a7               | 1.8 | 0.010976131 | 0.048937584 |
| 1392487_at   | Transcribed locus                                           | ---                  | 1.3 | 0.010976238 | 0.048937584 |
| 1388392_at   | Tax1 (human T-cell leukemia virus type I) binding protein 3 | Tax1bp3              | 1.5 | 0.010978823 | 0.048937584 |
| 1383409_at   | ---                                                         | ---                  | 1.6 | 0.010995152 | 0.048983817 |
| 1371352_at   | high mobility group nucleosomal binding domain 2            | Hmgn2                | 1.5 | 0.011004787 | 0.049000199 |
| 1374498_at   | Similar to CG13379-PA (predicted)                           | RGD1311493_predicted | 1.3 | 0.011047804 | 0.049138527 |
| 1374484_at   | transmembrane protein 39a                                   | Tmem39a              | 1.3 | 0.011071202 | 0.049229286 |
| 1373986_at   | Transcribed locus                                           | ---                  | 1.7 | 0.01111274  | 0.049360034 |
| 1393803_at   | caspase 8 associated protein 2 (predicted)                  | Casp8ap2_predicted   | 1.3 | 0.011113188 | 0.049360034 |
| 1373961_at   | similar to 4930453N24Rik protein                            | MGC95208             | 1.4 | 0.011129896 | 0.049396798 |
| 1371996_at   | AE binding protein 2 (predicted)                            | Aebp2_predicted      | 1.5 | 0.011150426 | 0.049445444 |
| 1392223_at   | epsin 2                                                     | Epn2                 | 1.4 | 0.011150728 | 0.049445444 |
| 1392446_at   | kelch-like 2, Mayven (Drosophila) (predicted)               | Klhl2_predicted      | 1.5 | 0.011179797 | 0.049538066 |
| 1389789_at   | Transcribed locus                                           | ---                  | 1.3 | 0.011211142 | 0.049663577 |
| 1380001_at   | similar to Pinin                                            | LOC368070            | 2.4 | 0.01121802  | 0.049680665 |
| 1382205_at   | Transcribed locus                                           | ---                  | 2.6 | 0.011235718 | 0.049745649 |
| 1390298_at   | sorting nexin associated golgi protein 1 (predicted)        | Snag1_predicted      | 1.3 | 0.011242804 | 0.04976363  |
| 1393107_at   | Transcribed locus                                           | ---                  | 1.4 | 0.011275153 | 0.049839752 |
| 1378373_at   | Transcribed locus                                           | ---                  | 1.5 | 0.011286751 | 0.049864217 |
| 1376729_at   | similar to DIP13 alpha (predicted)                          | RGD1309388_predicted | 1.3 | 0.011302106 | 0.049918648 |
| 1374803_at   | ---                                                         | ---                  | 1.5 | 0.011318153 | 0.049934837 |
| 1383470_at   | Transcribed locus                                           | ---                  | 1.5 | 0.011321345 | 0.049934837 |
| 1390941_at   | retinoblastoma binding protein 6                            | Rbbp6                | 1.5 | 0.011323987 | 0.049934837 |
| 1385261_s_at | Transcribed locus                                           | ---                  | 1.4 | 0.011330625 | 0.049942099 |
| 1379605_at   | Transcribed locus                                           | ---                  | 1.4 | 0.011336591 | 0.049950239 |
| 1397251_at   | Similar to hypothetical protein MGC32132 (predicted)        | RGD1307915_predicted | 1.3 | 0.011411773 | 0.050214245 |
| 1375634_at   | coiled-coil domain containing 53 (predicted)                | Ccdc53_predicted     | 1.7 | 0.011528333 | 0.050700006 |
| 1379164_at   | Zinc finger protein 142 (clone pHZ-49) (predicted)          | Znf142_predicted     | 1.5 | 0.011580312 | 0.050872282 |
| 1376701_a_at | similar to 5930416I19Rik protein                            | MGC94282             | 1.3 | 0.011592001 | 0.05087813  |
| 1374632_at   | phosphatidylserine receptor                                 | Ptdsr                | 1.4 | 0.011598153 | 0.05087813  |
| 1374943_at   | Transcribed locus                                           | ---                  | 1.5 | 0.011602861 | 0.05087813  |
| 1392961_at   | MOB1, Mps One Binder kinase activator-like 1B (yeast)       | Mobk1b               | 1.5 | 0.011612182 | 0.050891865 |
| 1385869_at   | Zinc finger protein 281                                     | Zfp281               | 1.8 | 0.011647786 | 0.051020716 |
| 1399020_at   | similar to family with sequence similarity 40, member A     | LOC362012            | 1.4 | 0.011715799 | 0.051237453 |
| 1388164_at   | RT1 class Ib, locus S3                                      | RT1-S3               | 2.0 | 0.011715957 | 0.051237453 |
| 1372356_at   | ubiquitin specific protease 54                              | Usp54                | 1.5 | 0.011730568 | 0.051260464 |
| 1394761_at   | Transcribed locus                                           | ---                  | 1.5 | 0.011740163 | 0.051288763 |
| 1371803_at   | GM2 ganglioside activator protein                           | Gm2a                 | 1.5 | 0.011748456 | 0.051289708 |
| 1373808_at   | CDNA clone IMAGE:7193711                                    | ---                  | 1.9 | 0.011775975 | 0.051376986 |
| 1390688_at   | DEAD (Asp-Glu-Ala-Asp) box polypeptide 50                   | Ddx50                | 1.3 | 0.011790148 | 0.051411546 |
| 1379352_at   | phosphatidylinositol-4-phosphate 5-kinase, type 1, beta     | Pip5k1b              | 1.8 | 0.011804158 | 0.051443188 |
| 1383637_at   | Transcribed locus                                           | ---                  | 1.6 | 0.011807173 | 0.051443188 |
| 1377723_at   | Transcribed locus                                           | ---                  | 1.9 | 0.011809915 | 0.051443188 |
| 1379435_at   | deoxyguanosine kinase (predicted)                           | Dguok_predicted      | 1.5 | 0.011831719 | 0.051497253 |
| 1383962_at   | Cd27 binding protein (Hindu God of destruction) (predicted) | Siva_predicted       | 1.4 | 0.011864709 | 0.051599877 |
| 1376595_at   | similar to peroxisome biogenesis factor 1 (predicted)       | RGD1559939_predicted | 1.5 | 0.01187655  | 0.051637719 |

|              |                                                                                                                                     |                         |     |             |             |
|--------------|-------------------------------------------------------------------------------------------------------------------------------------|-------------------------|-----|-------------|-------------|
| 1383945_at   | uridine-cytidine kinase 2 /// uridine monophosphate kinase (predicted)                                                              | Uck2 /// Umpk_predicted | 1.7 | 0.011881895 | 0.051647309 |
| 1368359_a_at | VGF nerve growth factor inducible                                                                                                   | Vgf                     | 3.5 | 0.011885523 | 0.051649428 |
| 1377080_at   | neurotrophin receptor associated death domain                                                                                       | Nradd                   | 1.7 | 0.011893701 | 0.051671313 |
| 1367935_at   | smu-1 suppressor of mec-8 and unc-52 homolog (C. elegans)                                                                           | Smu1                    | 1.3 | 0.01195471  | 0.05190894  |
| 1379098_at   | ---                                                                                                                                 | ---                     | 1.3 | 0.01197212  | 0.05197082  |
| 1388141_at   | centrin 3                                                                                                                           | Cetn3                   | 1.4 | 0.011990325 | 0.052036114 |
| 1382735_at   | autophagy-related 12 (yeast)                                                                                                        | Atg12                   | 1.6 | 0.012009867 | 0.052093432 |
| 1374549_at   | zinc responsive protein ZD7                                                                                                         | LOC474154               | 1.4 | 0.012023233 | 0.052137658 |
| 1386683_at   | Transcribed locus                                                                                                                   | ---                     | 1.6 | 0.012051336 | 0.052245748 |
| 1391026_at   | immediate early response 5-like                                                                                                     | Ier5l                   | 2.5 | 0.012077717 | 0.052332533 |
| 1388618_at   | nidogen 2                                                                                                                           | Nid2                    | 1.9 | 0.012098281 | 0.052407829 |
| 1394795_at   | Transcribed locus                                                                                                                   | ---                     | 1.9 | 0.012132795 | 0.052515847 |
| 1385761_s_at | Transcribed locus                                                                                                                   | ---                     | 1.4 | 0.01213966  | 0.052531736 |
| 1388330_at   | vitamin K epoxide reductase complex, subunit 1                                                                                      | Vkorc1                  | 1.4 | 0.012149674 | 0.052533607 |
| 1383253_at   | Transcribed locus                                                                                                                   | ---                     | 2.0 | 0.012171287 | 0.052602044 |
| 1379379_at   | Transcribed locus                                                                                                                   | ---                     | 1.5 | 0.012171898 | 0.052602044 |
| 1373087_at   | Membrane-associated ring finger (C3HC4) 7                                                                                           | Mar-07                  | 1.4 | 0.012177297 | 0.052611553 |
| 1394591_at   | zinc finger protein 207                                                                                                             | Zfp207                  | 1.3 | 0.012197837 | 0.052658235 |
| 1380293_at   | similar to chromosome 18 open reading frame 54                                                                                      | LOC361346               | 1.4 | 0.012199572 | 0.052658235 |
| 1374830_at   | Transcribed locus, strongly similar to XP_574081.1 similar to Coiled-coil domain containing protein 3 precursor [Rattus norvegicus] | ---                     | 1.8 | 0.012243913 | 0.052813739 |
| 1389780_at   | tissue factor pathway inhibitor                                                                                                     | Tfpi                    | 1.5 | 0.012246571 | 0.052813739 |
| 1370193_at   | protein tyrosine phosphatase 4a1                                                                                                    | Ptp4a1                  | 1.4 | 0.012284318 | 0.05294876  |
| 1372531_at   | protein tyrosine phosphatase, receptor-type, F interacting protein, binding protein 2                                               | Ppfbp2                  | 1.3 | 0.012319687 | 0.053087297 |
| 1379130_at   | CDW92 antigen                                                                                                                       | Cdw92                   | 1.5 | 0.012342413 | 0.053171298 |
| 1371322_at   | laminin, gamma 1                                                                                                                    | Lamc1                   | 1.6 | 0.012346302 | 0.053174121 |
| 1386611_at   | kelch-like 24 (Drosophila)                                                                                                          | Klhl24                  | 1.4 | 0.012366668 | 0.053233959 |
| 1377071_at   | Transcribed locus                                                                                                                   | ---                     | 1.4 | 0.012387228 | 0.053294568 |
| 1396356_at   | Transcribed locus                                                                                                                   | ---                     | 1.4 | 0.012396526 | 0.053319146 |
| 1398367_at   | speckle-type POZ protein                                                                                                            | Spop                    | 1.5 | 0.012433247 | 0.053436648 |
| 1376121_at   | PHD finger protein 10                                                                                                               | Phf10                   | 1.6 | 0.012456835 | 0.053523705 |
| 1392054_at   | similar to polybromo-1 (predicted)                                                                                                  | RGD1565549_predicted    | 1.4 | 0.01246239  | 0.053523705 |
| 1389442_at   | Transcribed locus                                                                                                                   | ---                     | 1.3 | 0.012466323 | 0.053523705 |
| 1383308_a_at | similar to hypothetical protein FLJ34389 (predicted)                                                                                | RGD1305243_predicted    | 1.4 | 0.012469774 | 0.053523705 |
| 1371715_at   | LOC500651                                                                                                                           | MGC112883               | 1.3 | 0.0124894   | 0.053593959 |
| 1371832_at   | Leo1, Paf1/RNA polymerase II complex component, homolog (S. cerevisiae)                                                             | Leo1                    | 1.5 | 0.012515054 | 0.053662045 |
| 1389576_at   | U2 small nuclear ribonucleoprotein B (predicted)                                                                                    | Snrpb2_predicted        | 1.5 | 0.012521827 | 0.053663107 |
| 1374061_at   | CD302 antigen                                                                                                                       | Cd302                   | 1.5 | 0.012616363 | 0.054026019 |
| 1394511_at   | myb-like, SWIRM and MPN domains 1 (predicted)                                                                                       | Mysm1_predicted         | 1.5 | 0.01264552  | 0.054114399 |
| 1385265_a_at | similar to Protein C12orf11 (Sarcoma antigen NY-SAR-95)                                                                             | LOC686480 /// LOC690728 | 1.5 | 0.012646872 | 0.054114399 |
| 1383332_at   | Transcribed locus                                                                                                                   | ---                     | 1.5 | 0.01265397  | 0.05412403  |
| 1367561_at   | ribosomal protein L27                                                                                                               | Rpl27                   | 1.5 | 0.012682969 | 0.054198358 |
| 1379370_at   | Transcribed locus                                                                                                                   | ---                     | 1.5 | 0.012693648 | 0.054229903 |
| 1374263_at   | Similar to sorbin and SH3 domain containing 1 isoform 3                                                                             | LOC686098               | 1.8 | 0.012702135 | 0.054242784 |
| 1385697_at   | cyclin T2 (predicted)                                                                                                               | Ccnt2_predicted         | 1.4 | 0.012748225 | 0.054389137 |
| 1371643_at   | cyclin D1                                                                                                                           | Ccnd1                   | 1.6 | 0.012749534 | 0.054389137 |
| 1388870_at   | similar to RNA-binding protein Musashi2-S (predicted)                                                                               | RGD1560397_predicted    | 1.4 | 0.012750761 | 0.054389137 |
| 1382283_at   | Transcribed locus                                                                                                                   | ---                     | 2.4 | 0.012767315 | 0.054417051 |
| 1396877_at   | Laminin, gamma 1                                                                                                                    | Lamc1                   | 1.8 | 0.01278336  | 0.054417051 |

|              |                                                                                                                                                                                                                                                                                                                                                                          |                                                                                     |     |             |             |
|--------------|--------------------------------------------------------------------------------------------------------------------------------------------------------------------------------------------------------------------------------------------------------------------------------------------------------------------------------------------------------------------------|-------------------------------------------------------------------------------------|-----|-------------|-------------|
| 1390154_at   | similar to Interferon-alpha/beta receptor beta chain precursor (IFN-alpha-REC) (Type I interferon receptor) (IFN-R) (Interferon alpha/beta receptor-2)                                                                                                                                                                                                                   | LOC686326                                                                           | 1.6 | 0.012788469 | 0.054417051 |
| 1373875_at   | similar to RIKEN cDNA 1190005P17 (predicted) /// hypothetical protein LOC690089                                                                                                                                                                                                                                                                                          | LOC690089 /// RGD1308261_predicted                                                  | 1.4 | 0.01278883  | 0.054417051 |
| 1390527_at   | RGD1562114 (predicted)                                                                                                                                                                                                                                                                                                                                                   | RGD1562114_predicted                                                                | 1.4 | 0.012790467 | 0.054417051 |
| 1376610_a_at | similar to TPR repeat-containing protein KIAA1043                                                                                                                                                                                                                                                                                                                        | LOC304558                                                                           | 1.8 | 0.012890541 | 0.054701657 |
| 1368770_at   | glucosaminyl (N-acetyl) transferase 1, core 2                                                                                                                                                                                                                                                                                                                            | Gcnt1                                                                               | 1.6 | 0.01294079  | 0.05488657  |
| 1382161_at   | M-phase phosphoprotein 10 (U3 small nucleolar ribonucleoprotein) (predicted)                                                                                                                                                                                                                                                                                             | Mphosph10_predicted                                                                 | 1.3 | 0.012957925 | 0.054930915 |
| 1389053_at   | similar to hypothetical protein FLJ20627 (predicted)                                                                                                                                                                                                                                                                                                                     | RGD1309546_predicted                                                                | 1.3 | 0.012987701 | 0.055028776 |
| 1390579_at   | similar to RIKEN cDNA 1810029B16 (predicted)                                                                                                                                                                                                                                                                                                                             | RGD1305222_predicted                                                                | 1.5 | 0.012991424 | 0.055030376 |
| 1383213_at   | epidermal growth factor receptor pathway substrate 8 (predicted)                                                                                                                                                                                                                                                                                                         | Eps8_predicted                                                                      | 1.3 | 0.013006577 | 0.055071668 |
| 1377138_at   | Ataxin 10                                                                                                                                                                                                                                                                                                                                                                | Atxn10                                                                              | 1.6 | 0.013007869 | 0.055071668 |
| 1380186_at   | Transcribed locus                                                                                                                                                                                                                                                                                                                                                        | ---                                                                                 | 1.3 | 0.013021882 | 0.055116807 |
| 1388167_at   | nuclear factor I/B                                                                                                                                                                                                                                                                                                                                                       | Nfib                                                                                | 1.9 | 0.013040179 | 0.055164743 |
| 1373066_at   | Transcribed locus                                                                                                                                                                                                                                                                                                                                                        | ---                                                                                 | 1.3 | 0.013042569 | 0.055164743 |
| 1370250_at   | ubiquitin-conjugating enzyme E2I /// similar to Chain A, Human Ubiquitin-Conjugating Enzyme Ubc9 (predicted) /// similar to RIKEN cDNA A930001M12 gene (predicted) /// similar to Ubiquitin-conjugating enzyme E2 I (Ubiquitin-protein ligase I) (Ubiquitin carrier protein I) (SUMO-1-protein ligase) (SUMO-1-conjugating enzyme) (Ubiquitin-conjugating enzyme UbcE2A) | LOC681942 /// LOC685390 /// RGD1562567_predicted /// RGD1566292_predicted /// Ube2i | 1.3 | 0.01312142  | 0.055363937 |
| 1370242_at   | ribosomal protein S23                                                                                                                                                                                                                                                                                                                                                    | Rps23                                                                               | 1.3 | 0.013148661 | 0.055425212 |
| 1371202_a_at | nuclear factor I/B                                                                                                                                                                                                                                                                                                                                                       | Nfib                                                                                | 1.3 | 0.013159313 | 0.05545559  |
| 1372207_at   | bromodomain containing 8                                                                                                                                                                                                                                                                                                                                                 | Brd8                                                                                | 1.3 | 0.013165998 | 0.055469859 |
| 1398830_at   | ribosomal protein L28                                                                                                                                                                                                                                                                                                                                                    | Rpl28                                                                               | 1.3 | 0.013198788 | 0.055578936 |
| 1379732_at   | syntaxin 11                                                                                                                                                                                                                                                                                                                                                              | Stx11                                                                               | 1.7 | 0.013208783 | 0.055578936 |
| 1384024_at   | bromodomain containing 1 (predicted)                                                                                                                                                                                                                                                                                                                                     | Brd1_predicted                                                                      | 1.4 | 0.013228071 | 0.05561741  |
| 1391773_at   | Transcribed locus                                                                                                                                                                                                                                                                                                                                                        | ---                                                                                 | 1.4 | 0.01323231  | 0.055621015 |
| 1376786_a_at | Transcribed locus                                                                                                                                                                                                                                                                                                                                                        | ---                                                                                 | 1.3 | 0.013250419 | 0.055668681 |
| 1391935_at   | similar to eukaryotic translation initiation factor 4E member 3                                                                                                                                                                                                                                                                                                          | LOC297481                                                                           | 1.8 | 0.013266634 | 0.055712564 |
| 1389705_at   | recombination activating gene 1 activating protein 1 (predicted)                                                                                                                                                                                                                                                                                                         | Rag1ap1_predicted                                                                   | 1.4 | 0.013287596 | 0.055753668 |
| 1395241_at   | ADP-ribosylation factor 1                                                                                                                                                                                                                                                                                                                                                | Arf1                                                                                | 1.4 | 0.013302356 | 0.055801364 |
| 1374197_at   | Transcribed locus                                                                                                                                                                                                                                                                                                                                                        | ---                                                                                 | 1.3 | 0.013313704 | 0.055834727 |
| 1376703_at   | nucleoporin 37 (predicted)                                                                                                                                                                                                                                                                                                                                               | Nup37_predicted                                                                     | 1.3 | 0.013325119 | 0.055868356 |
| 1391981_at   | Poliovirus receptor-related 3 (predicted)                                                                                                                                                                                                                                                                                                                                | Pvrl3_predicted                                                                     | 1.3 | 0.013351974 | 0.055952424 |
| 1367780_at   | pituitary tumor-transforming 1                                                                                                                                                                                                                                                                                                                                           | Pttg1                                                                               | 1.3 | 0.0133583   | 0.05596171  |
| 1385755_at   | Transcribed locus                                                                                                                                                                                                                                                                                                                                                        | ---                                                                                 | 1.4 | 0.013360994 | 0.05596171  |
| 1372859_at   | GDP-mannose pyrophosphorylase A                                                                                                                                                                                                                                                                                                                                          | Gmppa                                                                               | 1.2 | 0.013369989 | 0.055982998 |
| 1390445_at   | similar to mbt domain containing 1                                                                                                                                                                                                                                                                                                                                       | LOC688133                                                                           | 1.3 | 0.013372884 | 0.055982998 |
| 1377116_at   | Ribonuclease L (2',5'-oligoadenylate synthetase-dependent)                                                                                                                                                                                                                                                                                                               | Rnase1                                                                              | 1.3 | 0.013378326 | 0.055991528 |
| 1372096_at   | oxidative-stress responsive 1 (predicted)                                                                                                                                                                                                                                                                                                                                | Oxsr1_predicted                                                                     | 1.4 | 0.013385547 | 0.055995838 |
| 1370213_at   | Y box protein 1 /// similar to Nuclease sensitive element-binding protein 1 (Y-box-binding protein 1) (Y-box transcription factor) (YB-1) (CCAAT-binding transcription factor I subunit A) (CBF-A) (Enhancer factor I subunit A) (EFI-A) (DNA-binding protein B) (DBPB)...                                                                                               | LOC686530 /// Ybx1                                                                  | 1.9 | 0.013386164 | 0.055995838 |
| 1373895_at   | ---                                                                                                                                                                                                                                                                                                                                                                      | ---                                                                                 | 1.3 | 0.013431715 | 0.056102551 |

|              |                                                                                               |                                                        |     |             |             |
|--------------|-----------------------------------------------------------------------------------------------|--------------------------------------------------------|-----|-------------|-------------|
| 1396054_at   | Membrane protein, palmitoylated 6 (MAGUK p55 subfamily member 6) (predicted)                  | Mpp6_predicted                                         | 1.6 | 0.013432141 | 0.056102551 |
| 1392454_at   | similar to hypothetical protein FLJ20729 (predicted)                                          | RGD1308723_predicted                                   | 1.5 | 0.013455164 | 0.056170189 |
| 1377757_at   | SNF2 histone linker PHD RING helicase (predicted)                                             | Shprh_predicted                                        | 1.3 | 0.013478616 | 0.056225279 |
| 1369631_at   | ---                                                                                           | ---                                                    | 1.3 | 0.01349802  | 0.056291946 |
| 1379824_at   | thymocyte selection-associated HMG box gene (predicted)                                       | Tox_predicted                                          | 1.5 | 0.01353944  | 0.056436063 |
| 1374878_at   | Fms interacting protein                                                                       | Fmip                                                   | 1.5 | 0.013608502 | 0.056695197 |
| 1368087_a_at | protein tyrosine phosphatase, non-receptor type 21                                            | Ptpn21                                                 | 1.4 | 0.013612404 | 0.056697095 |
| 1378557_at   | Similar to TAF4 protein                                                                       | LOC689043                                              | 1.6 | 0.013619746 | 0.056713313 |
| 1379341_at   | USP6 N-terminal like (predicted)                                                              | Usp6n1_predicted                                       | 1.7 | 0.013637988 | 0.056774898 |
| 1375432_at   | similar to exosome component 1                                                                | LOC679140                                              | 1.4 | 0.013641958 | 0.056777055 |
| 1375217_at   | Meningioma expressed antigen 5 (hyaluronidase)                                                | Mgea5                                                  | 1.4 | 0.013655373 | 0.05678595  |
| 1392362_at   | Transcribed locus                                                                             | ---                                                    | 1.5 | 0.013655701 | 0.05678595  |
| 1379188_at   | AT rich interactive domain 2 (Arid-rfx like) (predicted)                                      | Arid2_predicted                                        | 1.6 | 0.01368766  | 0.056844472 |
| 1395686_at   | Activating transcription factor 7 (predicted)                                                 | Atf7_predicted                                         | 1.3 | 0.013693219 | 0.056844472 |
| 1393389_at   | Nuclear receptor subfamily 4, group A, member 3                                               | Nr4a3                                                  | 1.4 | 0.013694952 | 0.056844472 |
| 1385054_at   | Transcribed locus                                                                             | ---                                                    | 1.5 | 0.013703551 | 0.056844472 |
| 1385253_at   | Transcribed locus                                                                             | ---                                                    | 1.4 | 0.013709224 | 0.056844472 |
| 1389470_at   | complement factor B                                                                           | Cfb                                                    | 1.9 | 0.013709996 | 0.056844472 |
| 1388180_at   | phosphorylated adaptor for RNA export                                                         | Phax                                                   | 1.4 | 0.013725862 | 0.056895914 |
| 1394964_at   | similar to KIAA1096 protein (predicted) /// similar to HBxAg transactivated protein 2         | LOC684194 ///<br>LOC691387 ///<br>RGD1566064_predicted | 1.5 | 0.013745286 | 0.056947723 |
| 1395771_at   | Activating transcription factor 2                                                             | Atf2                                                   | 1.7 | 0.013769716 | 0.056980884 |
| 1374636_at   | PHD finger protein 17 (predicted)                                                             | Phf17_predicted                                        | 1.8 | 0.013774076 | 0.056980884 |
| 1398926_at   | prefoldin 1 (predicted)                                                                       | Pfdn1_predicted                                        | 1.6 | 0.013779469 | 0.056988862 |
| 1392204_at   | similar to NK10                                                                               | LOC498945                                              | 1.5 | 0.013787947 | 0.05700959  |
| 1374652_at   | Transcribed locus                                                                             | ---                                                    | 1.6 | 0.013814107 | 0.057103403 |
| 1387197_at   | osteomodulin                                                                                  | Omd                                                    | 2.6 | 0.013853877 | 0.057218045 |
| 1385876_at   | similar to Gpc6 protein (predicted)                                                           | RGD1563063_predicted                                   | 1.7 | 0.013866192 | 0.057218045 |
| 1389142_at   | similar to Sulfide:quinone oxidoreductase, mitochondrial precursor                            | LOC691966                                              | 1.4 | 0.013889872 | 0.057287016 |
| 1377747_at   | Transcribed locus                                                                             | ---                                                    | 1.4 | 0.013902334 | 0.057309671 |
| 1368545_at   | CASP8 and FADD-like apoptosis regulator                                                       | Cflar                                                  | 1.5 | 0.013923179 | 0.05734821  |
| 1379316_at   | ---                                                                                           | ---                                                    | 1.5 | 0.01393462  | 0.057370873 |
| 1375932_at   | Transcribed locus                                                                             | ---                                                    | 1.4 | 0.013949737 | 0.057385309 |
| 1385859_at   | Glutaredoxin 2 (thioltransferase)                                                             | Glrx2                                                  | 1.5 | 0.013954397 | 0.057385309 |
| 1396062_at   | Transcribed locus                                                                             | ---                                                    | 1.2 | 0.013970106 | 0.05743072  |
| 1374188_at   | translocation protein 1                                                                       | Tloc1                                                  | 1.8 | 0.014119963 | 0.057930943 |
| 1385953_at   | Myeloid/lymphoid or mixed-lineage leukemia,translocated to, 3 (trithorax homolog, Drosophila) | Mllt3                                                  | 1.6 | 0.014147662 | 0.058001183 |
| 1370166_at   | syndecan 2                                                                                    | Sdc2                                                   | 1.5 | 0.014154385 | 0.058014286 |
| 1391309_at   | similar to Complement C1q-like protein 3 precursor (Gliacolin)                                | LOC680404 ///<br>LOC684921                             | 1.6 | 0.014158364 | 0.058016138 |
| 1395436_at   | Protein phosphatase 3, catalytic subunit, alpha isoform                                       | Ppp3ca                                                 | 1.9 | 0.014194172 | 0.058143689 |
| 1382436_at   | similar to RIKEN cDNA 2610002M06 (predicted)                                                  | RGD1566265_predicted                                   | 1.5 | 0.014250515 | 0.058321093 |
| 1387318_at   | potassium large conductance calcium-activated channel, subfamily M, beta member 4             | Kcnmb4                                                 | 1.9 | 0.014265725 | 0.058339791 |
| 1370243_a_at | prothymosin alpha                                                                             | Ptma                                                   | 1.9 | 0.014317809 | 0.058523689 |

|              |                                                                                                                                                                                        |                                                                                       |     |             |             |
|--------------|----------------------------------------------------------------------------------------------------------------------------------------------------------------------------------------|---------------------------------------------------------------------------------------|-----|-------------|-------------|
| 1371189_x_at | ribosomal protein SA /// similar to 40S ribosomal protein SA (p40) (34/67 kDa laminin receptor) (predicted) /// similar to 40S ribosomal protein SA (p40) (34/67 kDa laminin receptor) | LOC367035 /// LOC679411 /// LOC683125 /// LOC688911 /// RGD1563757_predicted /// Rpsa | 1.5 | 0.014340365 | 0.058598432 |
| 1397583_at   | Transcribed locus                                                                                                                                                                      | ---                                                                                   | 1.4 | 0.01434322  | 0.058598432 |
| 1389555_at   | transcription factor 19                                                                                                                                                                | Tcf19                                                                                 | 1.9 | 0.014404277 | 0.058804058 |
| 1375901_at   | DEAD (Asp-Glu-Ala-Asp) box polypeptide 21a                                                                                                                                             | Ddx21a                                                                                | 1.3 | 0.014427307 | 0.058868852 |
| 1371848_at   | similar to small nuclear ribonucleoprotein D3                                                                                                                                          | LOC687711                                                                             | 1.4 | 0.014485486 | 0.059003614 |
| 1382466_at   | similar to RIKEN cDNA 6530403A03                                                                                                                                                       | RGD1309020                                                                            | 2.0 | 0.014494547 | 0.059003614 |
| 1397362_at   | Hippyrgragin                                                                                                                                                                           | LOC257650                                                                             | 1.6 | 0.014497872 | 0.059003614 |
| 1371237_a_at | metallothionein 1a                                                                                                                                                                     | Mt1a                                                                                  | 1.8 | 0.014499794 | 0.059003614 |
| 1387077_at   | cAMP-regulated phosphoprotein 19                                                                                                                                                       | Arpp19                                                                                | 1.5 | 0.014509665 | 0.059029178 |
| 1367724_a_at | ATPase, H+ transporting, V0 subunit E isoform 1                                                                                                                                        | Atp6v0e1                                                                              | 1.3 | 0.014529817 | 0.059096544 |
| 1374601_at   | interferon gamma receptor 2 (predicted)                                                                                                                                                | lfngr2_predicted                                                                      | 1.5 | 0.014569642 | 0.059214597 |
| 1373315_at   | Aryl hydrocarbon receptor nuclear translocator 2                                                                                                                                       | Arnt2                                                                                 | 1.4 | 0.014634743 | 0.059449801 |
| 1368162_at   | cystatin E/M                                                                                                                                                                           | Cst6                                                                                  | 1.5 | 0.01465096  | 0.059486296 |
| 1378745_at   | period homolog 3 (Drosophila)                                                                                                                                                          | Per3                                                                                  | 1.7 | 0.014737701 | 0.059749991 |
| 1397904_at   | Transcribed locus                                                                                                                                                                      | ---                                                                                   | 1.4 | 0.014811455 | 0.059975087 |
| 1396208_at   | gamma-glutamyltransferase-like activity 1                                                                                                                                              | Gglt1a                                                                                | 1.5 | 0.014859604 | 0.060110861 |
| 1374205_at   | transcription factor Pur-beta                                                                                                                                                          | pur-beta                                                                              | 1.4 | 0.014868138 | 0.060130594 |
| 1377908_at   | Transcribed locus                                                                                                                                                                      | ---                                                                                   | 1.3 | 0.014885141 | 0.06017462  |
| 1374178_at   | Transcribed locus                                                                                                                                                                      | ---                                                                                   | 1.4 | 0.014886341 | 0.06017462  |
| 1373651_at   | Transcribed locus                                                                                                                                                                      | ---                                                                                   | 1.9 | 0.014894497 | 0.060192797 |
| 1388681_at   | SAR1 gene homolog B (S. cerevisiae)                                                                                                                                                    | Sar1b                                                                                 | 1.3 | 0.014912955 | 0.060247945 |
| 1376990_at   | Similar to HCDI protein (predicted)                                                                                                                                                    | RGD1309307_predicted                                                                  | 1.3 | 0.014918528 | 0.060247945 |
| 1368004_at   | mitochondrial ribosomal protein L23                                                                                                                                                    | Mrpl23                                                                                | 1.3 | 0.01491935  | 0.060247945 |
| 1367837_at   | proteasome (prosome, macropain) subunit, alpha type 4                                                                                                                                  | PsmA4                                                                                 | 1.3 | 0.014938048 | 0.060279935 |
| 1385887_at   | Cut-like 1 (Drosophila)                                                                                                                                                                | Cutl1                                                                                 | 1.6 | 0.01494461  | 0.060291621 |
| 1398905_at   | ATPase, H transporting, lysosomal V1 subunit G1 (predicted)                                                                                                                            | Atp6v1g1_predicted                                                                    | 1.3 | 0.015021467 | 0.060525868 |
| 1375185_at   | importin 7 (predicted)                                                                                                                                                                 | Ipo7_predicted                                                                        | 1.4 | 0.015025527 | 0.060525868 |
| 1389191_at   | vacuolar protein sorting 36 (yeast) (predicted)                                                                                                                                        | Vps36_predicted                                                                       | 1.3 | 0.015026586 | 0.060525868 |
| 1390513_at   | similar to ras homolog gene family, member f                                                                                                                                           | LOC687609                                                                             | 1.5 | 0.015031132 | 0.060525868 |
| 1387883_a_at | thymosin, beta 4                                                                                                                                                                       | Tmsb4x                                                                                | 1.5 | 0.015078731 | 0.060683866 |
| 1381162_at   | Similar to septin 10 isoform 1                                                                                                                                                         | LOC309891                                                                             | 1.3 | 0.015137753 | 0.060891602 |
| 1376067_at   | ---                                                                                                                                                                                    | ---                                                                                   | 1.2 | 0.015157532 | 0.060942572 |
| 1374280_at   | cerebellin 2 precursor protein                                                                                                                                                         | Cbln2                                                                                 | 1.8 | 0.015157835 | 0.060942572 |
| 1367580_at   | ribosomal protein L10A                                                                                                                                                                 | Rpl10a                                                                                | 1.3 | 0.01518527  | 0.061023045 |
| 1373415_at   | Transcribed locus                                                                                                                                                                      | ---                                                                                   | 1.3 | 0.015189764 | 0.061023737 |
| 1382198_at   | pumilio 2 (Drosophila)                                                                                                                                                                 | Pum2                                                                                  | 1.4 | 0.015202938 | 0.061049296 |
| 1375859_a_at | Transcribed locus                                                                                                                                                                      | ---                                                                                   | 1.2 | 0.015247019 | 0.061196431 |
| 1372714_at   | similar to RIKEN cDNA 8430437G11                                                                                                                                                       | RGD1307778                                                                            | 1.4 | 0.015274619 | 0.0612773   |
| 1389996_at   | NIMA (never in mitosis gene a)-related expressed kinase 1 (predicted)                                                                                                                  | Nek1_predicted                                                                        | 1.8 | 0.015312799 | 0.061400516 |
| 1397602_at   | Similar to RIKEN cDNA 5033405K12 (predicted)                                                                                                                                           | RGD1311593_predicted                                                                  | 1.6 | 0.015363012 | 0.061541845 |
| 1391701_at   | Transcribed locus                                                                                                                                                                      | ---                                                                                   | 1.8 | 0.01539041  | 0.061612448 |
| 1375938_at   | coiled-coil domain containing 12 (predicted)                                                                                                                                           | Ccdc12_predicted                                                                      | 1.4 | 0.015391874 | 0.061612448 |
| 1397949_at   | Membrane protein, palmitoylated 6 (MAGUK p55 subfamily member 6) (predicted)                                                                                                           | Mpp6_predicted                                                                        | 2.1 | 0.015408921 | 0.061641742 |
| 1373214_at   | KDEL (Lys-Asp-Glu-Leu) containing 1                                                                                                                                                    | Kdelc1                                                                                | 1.4 | 0.015410436 | 0.061641742 |
| 1374421_at   | bromodomain adjacent to zinc finger domain protein 1B                                                                                                                                  | Baz1b                                                                                 | 1.3 | 0.015532817 | 0.062070887 |
| 1391649_a_at | Transcribed locus                                                                                                                                                                      | ---                                                                                   | 1.8 | 0.01554372  | 0.062099369 |
| 1385334_at   | Transcribed locus                                                                                                                                                                      | ---                                                                                   | 2.2 | 0.015619461 | 0.062356526 |
| 1393938_at   | Transcribed locus                                                                                                                                                                      | ---                                                                                   | 1.4 | 0.015628229 | 0.062374082 |

|              |                                                                                       |                      |     |             |             |
|--------------|---------------------------------------------------------------------------------------|----------------------|-----|-------------|-------------|
| 1390896_at   | Transcribed locus                                                                     | ---                  | 1.5 | 0.015639027 | 0.062374082 |
| 1368083_at   | cyclin H                                                                              | Ccnh                 | 1.4 | 0.015693448 | 0.062539676 |
| 1393512_at   | Transcribed locus                                                                     | ---                  | 1.5 | 0.015719167 | 0.062602627 |
| 1384497_at   | Kruppel-like factor 7 (ubiquitous) (predicted)                                        | Klf7_predicted       | 1.7 | 0.015729661 | 0.062620792 |
| 1388630_at   | Transcribed locus                                                                     | ---                  | 1.4 | 0.015735149 | 0.062620792 |
| 1377640_at   | Transcribed locus                                                                     | ---                  | 1.6 | 0.015739492 | 0.062622922 |
| 1398349_at   | adenylate kinase 2                                                                    | Ak2                  | 1.4 | 0.015781958 | 0.06274635  |
| 1382031_at   | Transcribed locus                                                                     | ---                  | 2.3 | 0.015795281 | 0.062784143 |
| 1389000_at   | similar to jumonji domain containing 1B                                               | LOC682469            | 1.3 | 0.01582535  | 0.062888467 |
| 1382921_at   | SDA1 domain containing 1                                                              | Sdad1                | 1.5 | 0.015846671 | 0.062947401 |
| 1371900_at   | CUG triplet repeat, RNA binding protein 1                                             | Cugbp1               | 1.3 | 0.015847835 | 0.062947401 |
| 1393015_at   | similar to hypothetical protein FLJ14146                                              | RGD1310587           | 1.6 | 0.015854465 | 0.062958531 |
| 1390886_at   | Coiled-coil domain containing 39 (predicted)                                          | Ccdc39_predicted     | 1.7 | 0.015904115 | 0.063140448 |
| 1370927_at   | procollagen, type XII, alpha 1                                                        | Col12a1              | 1.6 | 0.015952003 | 0.063269484 |
| 1385038_at   | similar to hedgehog-interacting protein (predicted)                                   | RGD1564108_predicted | 1.5 | 0.015962794 | 0.063272185 |
| 1377551_at   | Transcribed locus                                                                     | ---                  | 2.2 | 0.015963802 | 0.063272185 |
| 1383685_at   | HEAT repeat containing 1 (predicted)                                                  | Heatr1_predicted     | 1.3 | 0.015964225 | 0.063272185 |
| 1383347_at   | REV1-like (S. cerevisiae) (predicted)                                                 | Rev11_predicted      | 1.5 | 0.016004695 | 0.063417304 |
| 1375369_at   | similar to hypothetical protein FLJ20154                                              | RGD1305793           | 1.3 | 0.016022432 | 0.063460875 |
| 1393145_at   | follicular lymphoma variant translocation 1 (predicted)                               | Fvt1_predicted       | 1.3 | 0.016027266 | 0.063460875 |
| 1374034_at   | cysteinyl-tRNA synthetase (predicted)                                                 | Cars_predicted       | 1.4 | 0.016071622 | 0.063590578 |
| 1368063_a_at | splicing factor YT521-B                                                               | Yt521                | 1.3 | 0.016106519 | 0.063709748 |
| 1393330_at   | ---                                                                                   | ---                  | 1.5 | 0.016109487 | 0.063709748 |
| 1382363_at   | membrane protein, palmitoylated 5 (MAGUK p55 subfamily member 5) (predicted)          | Mpp5_predicted       | 1.4 | 0.016122688 | 0.063723786 |
| 1371664_at   | paxillin                                                                              | Pxn                  | 1.4 | 0.016134366 | 0.063746829 |
| 1377607_at   | mitogen activated protein kinase kinase kinase 3 (predicted)                          | Map3k3_predicted     | 1.5 | 0.016161558 | 0.063789202 |
| 1381610_at   | Transcribed locus                                                                     | ---                  | 1.8 | 0.016156256 | 0.063789202 |
| 1383295_at   | ---                                                                                   | ---                  | 1.4 | 0.016160418 | 0.063789202 |
| 1370088_at   | sperm autoantigenic protein 17                                                        | Spa17                | 1.6 | 0.01619029  | 0.063854403 |
| 1377810_at   | Ral GEF with PH domain and SH3 binding motif 2                                        | Ralgps2              | 1.3 | 0.016196533 | 0.063854403 |
| 1377835_at   | similar to dedicator of cytokinesis 8                                                 | LOC499337            | 1.7 | 0.016205971 | 0.063870855 |
| 1378114_at   | Wolf-Hirschhorn syndrome candidate 1-like 1 (predicted)                               | Whsc111_predicted    | 1.2 | 0.016208472 | 0.063870855 |
| 1395121_at   | Transcribed locus                                                                     | ---                  | 1.8 | 0.016270141 | 0.064053944 |
| 1376744_at   | Similar to RNA-binding region (RNP1, RRM) containing 3                                | LOC686263            | 1.6 | 0.016271864 | 0.064053944 |
| 1372621_at   | similar to 2610027C15Rik protein (predicted)                                          | RGD1308876_predicted | 1.9 | 0.016304499 | 0.064141689 |
| 1390803_at   | HIV TAT specific factor 1 (predicted)                                                 | Htatsf1_predicted    | 1.4 | 0.016351526 | 0.06428057  |
| 1372870_at   | KDEL (Lys-Asp-Glu-Leu) endoplasmic reticulum protein retention receptor 3 (predicted) | Kdelr3_predicted     | 1.5 | 0.016356749 | 0.064284549 |
| 1389263_at   | retinoic acid induced 14                                                              | Rai14                | 1.7 | 0.016371999 | 0.064284549 |
| 1397574_at   | Transcribed locus                                                                     | ---                  | 1.3 | 0.016373129 | 0.064284549 |
| 1383539_at   | Transcribed locus                                                                     | ---                  | 1.3 | 0.016390979 | 0.064284549 |
| 1383041_x_at | ---                                                                                   | ---                  | 2.3 | 0.016394852 | 0.064284549 |
| 1389778_a_at | transcription elongation factor B (SIII), polypeptide 3                               | Tceb3                | 1.4 | 0.016400306 | 0.064284549 |
| 1380214_at   | Transcribed locus                                                                     | ---                  | 1.6 | 0.016403347 | 0.064284549 |
| 1380347_at   | Transcribed locus                                                                     | ---                  | 1.5 | 0.01646853  | 0.064493899 |
| 1388344_at   | similar to RIKEN cDNA 1110005A23                                                      | RGD1305692           | 1.6 | 0.016493781 | 0.064562044 |
| 1373152_at   | protease, serine, 23                                                                  | Prss23               | 1.6 | 0.016526742 | 0.064656133 |
| 1384558_at   | placenta-specific 9 (predicted)                                                       | Plac9_predicted      | 1.5 | 0.016529611 | 0.064656133 |
| 1367547_at   | similar to zinc finger protein 198                                                    | LOC305913            | 1.3 | 0.01654938  | 0.064710212 |
| 1382814_at   | odd Oz/ten-m homolog 3 (Drosophila) (predicted)                                       | Odz3_predicted       | 1.7 | 0.01657188  | 0.06476437  |
| 1373770_at   | ---                                                                                   | ---                  | 1.3 | 0.016573032 | 0.06476437  |
| 1396654_at   | CUG triplet repeat, RNA binding protein 2                                             | Cugbp2               | 1.8 | 0.016672256 | 0.065112926 |
| 1376879_at   | RWD domain containing 4A                                                              | Rwdd4a               | 1.8 | 0.016687718 | 0.065119714 |

|            |                                                                                                                         |                                |     |             |             |
|------------|-------------------------------------------------------------------------------------------------------------------------|--------------------------------|-----|-------------|-------------|
| 1372355_at | Transcribed locus                                                                                                       | ---                            | 1.3 | 0.016733866 | 0.065222424 |
| 1374508_at | ---                                                                                                                     | ---                            | 1.4 | 0.016741068 | 0.065235035 |
| 1390115_at | SEC63-like ( <i>S. cerevisiae</i> ) (predicted)                                                                         | Sec63_predicted                | 1.3 | 0.016760803 | 0.065281007 |
| 1378257_at | ---                                                                                                                     | ---                            | 1.3 | 0.016768307 | 0.065287709 |
| 1385471_at | DEAD (Asp-Glu-Ala-Asp) box polypeptide 27                                                                               | Ddx27                          | 1.4 | 0.016774432 | 0.065287709 |
| 1382021_at | Transcribed locus                                                                                                       | ---                            | 1.7 | 0.016801241 | 0.065376581 |
| 1382040_at | glutamyl-prolyl-tRNA synthetase                                                                                         | Eprs                           | 1.6 | 0.016829752 | 0.065451434 |
| 1388897_at | WD repeat domain 5                                                                                                      | Wdr5                           | 1.4 | 0.016831023 | 0.065451434 |
| 1384062_at | Phosphatidylinositol 4-kinase, catalytic, beta polypeptide                                                              | Pik4cb                         | 1.7 | 0.016836038 | 0.065451434 |
| 1389482_at | similar to EST AA792894                                                                                                 | RGD1306495                     | 1.2 | 0.016863428 | 0.06551203  |
| 1374333_at | similar to RIKEN cDNA 1110007C09 (predicted)                                                                            | RGD1306058_predicted           | 1.3 | 0.016879826 | 0.065558294 |
| 1393743_at | Transcribed locus                                                                                                       | ---                            | 1.4 | 0.016886527 | 0.065568839 |
| 1375059_at | similar to zinc finger protein 652 (predicted)                                                                          | RGD1566329_predicted           | 1.7 | 0.016911886 | 0.065651806 |
| 1389194_at | Transcribed locus, moderately similar to XP_001153858.1 hypothetical protein isoform 3 [Pan troglodytes]                | ---                            | 2.1 | 0.016926911 | 0.065679129 |
| 1373015_at | ring finger protein 11 (predicted) /// similar to RING finger protein 11 (NEDD4 WW domain-binding protein 2) (Sid 1669) | LOC683844 /// Rnf11_predicted  | 1.4 | 0.016940692 | 0.065713213 |
| 1395645_at | ---                                                                                                                     | ---                            | 1.8 | 0.017034242 | 0.06595556  |
| 1380940_at | Similar to sorbin and SH3 domain containing 1 isoform 3                                                                 | LOC686098                      | 2.0 | 0.017137121 | 0.066275891 |
| 1383435_at | sodium channel, voltage-gated, type III, beta                                                                           | Scn3b                          | 1.7 | 0.01714904  | 0.066279578 |
| 1392523_at | Son cell proliferation protein                                                                                          | Son                            | 1.8 | 0.01715699  | 0.066290386 |
| 1386901_at | similar to fatty acid translocase/CD36 (predicted)                                                                      | RGD1562323_predicted           | 1.4 | 0.017196821 | 0.06641308  |
| 1383907_at | Transcribed locus                                                                                                       | ---                            | 1.4 | 0.017231382 | 0.066488708 |
| 1373669_at | glucosamine-6-phosphate deaminase 2 (predicted)                                                                         | Gnpda2_predicted               | 1.4 | 0.017239038 | 0.066498055 |
| 1390380_at | similar to Ski protein (predicted)                                                                                      | RGD1565591_predicted           | 2.0 | 0.017395176 | 0.067012556 |
| 1379347_at | Similar to RIKEN cDNA 1700023M03                                                                                        | RGD1305457                     | 1.4 | 0.01739789  | 0.067012556 |
| 1399081_at | pellino homolog 1 ( <i>Drosophila</i> ) /// similar to pellino protein (predicted)                                      | Peli1 /// RGD1564594_predicted | 1.9 | 0.017400938 | 0.067012556 |
| 1386818_at | Transcribed locus                                                                                                       | ---                            | 1.6 | 0.017432723 | 0.067103539 |
| 1371763_at | similar to RIKEN cDNA 4931406C07                                                                                        | RGD1309534                     | 1.3 | 0.017438436 | 0.067105598 |
| 1398373_at | UDP-Gal:betaGlcNAc beta 1,3-galactosyltransferase, polypeptide 3                                                        | B3galt3                        | 1.4 | 0.017441417 | 0.067105598 |
| 1389355_at | immediate early response 5                                                                                              | Ier5                           | 3.4 | 0.017530121 | 0.067415345 |
| 1373020_at | similar to mitochondria-associated granulocyte macrophage CSF signaling molecule                                        | LOC679907 /// LOC687579        | 1.2 | 0.017581275 | 0.067573984 |
| 1374154_at | Similar to splicing factor, arginine/serine-rich 2, interacting protein                                                 | LOC312030                      | 1.3 | 0.017581947 | 0.067573984 |
| 1371552_at | Transcribed locus                                                                                                       | ---                            | 1.3 | 0.017587329 | 0.067573984 |
| 1374587_at | Transcribed locus                                                                                                       | ---                            | 1.4 | 0.017587806 | 0.067573984 |
| 1383271_at | coiled-coil domain containing 59 (predicted)                                                                            | Ccdc59_predicted               | 1.7 | 0.017631561 | 0.06769466  |
| 1372133_at | related RAS viral (r-ras) oncogene homolog 2                                                                            | Rras2                          | 1.6 | 0.017643551 | 0.067724883 |
| 1387606_at | fibroblast growth factor 2                                                                                              | Fgf2                           | 1.5 | 0.017668693 | 0.06778975  |
| 1387022_at | aldehyde dehydrogenase family 1, member A1                                                                              | Aldh1a1                        | 2.0 | 0.017687194 | 0.067829089 |
| 1383167_at | Transcribed locus                                                                                                       | ---                            | 1.9 | 0.017794623 | 0.06817749  |
| 1372438_at | nitrilase family, member 2                                                                                              | Nit2                           | 1.3 | 0.017860945 | 0.068399726 |
| 1397549_at | centaurin, gamma 1                                                                                                      | Centg1                         | 1.3 | 0.017875751 | 0.068408718 |
| 1387870_at | zinc finger protein 36                                                                                                  | Zfp36                          | 1.5 | 0.017890392 | 0.06841692  |
| 1383400_at | similar to TBP-associated factor 4                                                                                      | LOC682097                      | 1.7 | 0.017899344 | 0.068420423 |
| 1382720_at | Transcribed locus                                                                                                       | ---                            | 1.3 | 0.017904285 | 0.068420423 |
| 1372987_at | Transcribed locus, weakly similar to NP_002218.2 kinase 1 [Homo sapiens]                                                | ---                            | 1.3 | 0.01791258  | 0.068422228 |
| 1372371_at | Transcribed locus                                                                                                       | ---                            | 1.3 | 0.017983234 | 0.068602268 |



|              |                                                                                                                                                             |                      |     |             |             |
|--------------|-------------------------------------------------------------------------------------------------------------------------------------------------------------|----------------------|-----|-------------|-------------|
| 1394849_at   | zinc finger and BTB domain containing 20 (predicted)                                                                                                        | Zbtb20_predicted     | 1.9 | 0.017990097 | 0.068606799 |
| 1372456_at   | mitochondrial ribosomal protein S31 (predicted)                                                                                                             | Mrps31_predicted     | 1.4 | 0.018012194 | 0.068659229 |
| 1371539_at   | nucleolar protein family A, member 2 (predicted)                                                                                                            | Nola2_predicted      | 1.3 | 0.018022696 | 0.06868334  |
| 1371782_at   | nipsnap homolog 3A (C. elegans)                                                                                                                             | Nipsnap3a            | 1.3 | 0.018036211 | 0.068718925 |
| 1373131_at   | Pbx/knotted 1 homeobox                                                                                                                                      | Pknox1               | 1.6 | 0.018056619 | 0.068773766 |
| 1389294_at   | cytoplasmic FMR1 interacting protein 1 (predicted)                                                                                                          | Cyfp1_predicted      | 1.3 | 0.018063149 | 0.068773766 |
| 1396063_at   | DEK oncogene (DNA binding)                                                                                                                                  | Dek                  | 3.0 | 0.018117879 | 0.068950227 |
| 1382130_at   | protocadherin 19 (predicted)                                                                                                                                | Pcdh19_predicted     | 1.9 | 0.018193519 | 0.069174065 |
| 1367958_at   | abl-interactor 1                                                                                                                                            | Abi1                 | 1.3 | 0.018273383 | 0.06942957  |
| 1374418_at   | ---                                                                                                                                                         | ---                  | 1.3 | 0.018285137 | 0.069446364 |
| 1378178_at   | SMC6 structural maintenance of chromosomes 6-like 1 (yeast) (predicted)                                                                                     | Smc6l1_predicted     | 1.4 | 0.018289189 | 0.069446364 |
| 1376834_at   | ataxia telangiectasia mutated homolog (human)                                                                                                               | Atm                  | 1.3 | 0.01829047  | 0.069446364 |
| 1378595_at   | ---                                                                                                                                                         | ---                  | 1.5 | 0.018296204 | 0.069452104 |
| 1367893_a_at | chloride channel CLIC-like 1                                                                                                                                | Clcc1                | 1.6 | 0.018308119 | 0.069481298 |
| 1380701_at   | Sperm specific antigen 2 (predicted)                                                                                                                        | Ssfa2_predicted      | 1.6 | 0.018336546 | 0.069573127 |
| 1395327_at   | Transcribed locus                                                                                                                                           | ---                  | 1.6 | 0.018361639 | 0.069620156 |
| 1393922_at   | similar to cDNA sequence BC020077 (predicted)                                                                                                               | RGD1561825_predicted | 1.5 | 0.01838209  | 0.069681634 |
| 1388530_at   | CDC42 small effector 1                                                                                                                                      | Cdc42se1             | 1.4 | 0.018451922 | 0.069881928 |
| 1390586_at   | similar to Jumonji/ARID domain-containing protein 1C (SmcX protein) (predicted)                                                                             | RGD1560601_predicted | 1.7 | 0.018481442 | 0.06994541  |
| 1373473_a_at | nucleosome assembly protein 1-like 1                                                                                                                        | Nap1l1               | 1.3 | 0.018491584 | 0.069967697 |
| 1367494_at   | similar to CGI-35 protein (predicted)                                                                                                                       | RGD1310899_predicted | 1.4 | 0.018526984 | 0.070033329 |
| 1380323_at   | Transcribed locus                                                                                                                                           | ---                  | 1.7 | 0.018528353 | 0.070033329 |
| 1394756_at   | Similar to CG10084-PA                                                                                                                                       | RGD1308297           | 1.9 | 0.018530219 | 0.070033329 |
| 1369966_a_at | ribosomal protein S24                                                                                                                                       | Rps24                | 1.7 | 0.018582788 | 0.070215873 |
| 1383821_at   | Interleukin enhancer binding factor 3                                                                                                                       | Ilf3                 | 1.2 | 0.018666342 | 0.070402201 |
| 1379062_at   | ---                                                                                                                                                         | ---                  | 2.2 | 0.018686645 | 0.070462619 |
| 1373867_at   | similar to Retinoblastoma-binding protein 2 (RBBP-2)                                                                                                        | LOC312678            | 1.3 | 0.01869219  | 0.07046737  |
| 1390387_at   | Transcribed locus                                                                                                                                           | ---                  | 1.4 | 0.018700555 | 0.070482752 |
| 1398382_at   | Transcribed locus                                                                                                                                           | ---                  | 1.4 | 0.018715324 | 0.070507459 |
| 1383320_at   | lymphocyte protein tyrosine kinase                                                                                                                          | Lck                  | 1.3 | 0.018794578 | 0.070756059 |
| 1374415_at   | polymerase (RNA) III (DNA directed) polypeptide E (predicted)                                                                                               | Polr3e_predicted     | 1.3 | 0.018812058 | 0.070789459 |
| 1383999_at   | Transcribed locus                                                                                                                                           | ---                  | 1.4 | 0.018830482 | 0.070825455 |
| 1379719_at   | Transcribed locus                                                                                                                                           | ---                  | 1.6 | 0.018834541 | 0.070825455 |
| 1378313_at   | Similar to methylenetetrahydrofolate dehydrogenase (NAD) (EC 1.5.1.15) / methenyltetrahydrofolate cyclohydrolase (EC 3.5.4.9) precursor - mouse (predicted) | RGD1310879_predicted | 1.9 | 0.018840266 | 0.070830787 |
| 1379793_at   | similar to RIKEN cDNA 3110031B13                                                                                                                            | RGD1305356           | 2.0 | 0.018874164 | 0.070925044 |
| 1369304_at   | 6-pyruvoyl-tetrahydropterin synthase                                                                                                                        | Pts                  | 1.4 | 0.018883689 | 0.070925044 |
| 1373341_at   | similar to RIKEN cDNA 2410018C17 (predicted)                                                                                                                | RGD1563315_predicted | 1.4 | 0.018901735 | 0.070925044 |
| 1384483_at   | RGD1561157 (predicted)                                                                                                                                      | RGD1561157_predicted | 1.7 | 0.018904412 | 0.070925044 |
| 1368014_at   | prostaglandin E synthase                                                                                                                                    | Ptges                | 1.3 | 0.018904782 | 0.070925044 |
| 1370414_at   | Rab38, member of RAS oncogene family                                                                                                                        | Rab38                | 1.5 | 0.018919171 | 0.070932877 |
| 1375872_at   | Transcribed locus                                                                                                                                           | ---                  | 1.4 | 0.018939634 | 0.070993415 |
| 1389862_at   | similar to hypothetical protein MGC3731                                                                                                                     | RGD1305327           | 1.3 | 0.018976322 | 0.071114727 |
| 1379538_at   | centromere protein J (predicted)                                                                                                                            | Centpj_predicted     | 1.5 | 0.019030112 | 0.071218949 |
| 1374100_at   | ---                                                                                                                                                         | ---                  | 1.2 | 0.019059946 | 0.071314376 |
| 1380041_at   | Transcribed locus                                                                                                                                           | ---                  | 1.4 | 0.019078685 | 0.071335808 |
| 1372706_at   | hexosaminidase B                                                                                                                                            | Hexb                 | 1.5 | 0.019109755 | 0.071435739 |
| 1373763_at   | zinc finger protein 297B                                                                                                                                    | Zfp297b              | 1.3 | 0.01920178  | 0.071698269 |
| 1398768_at   | retinoblastoma binding protein 7                                                                                                                            | Rbbp7                | 1.3 | 0.019242248 | 0.0718139   |

|              |                                                                                                 |                                                         |     |             |             |
|--------------|-------------------------------------------------------------------------------------------------|---------------------------------------------------------|-----|-------------|-------------|
| 1382955_at   | G protein-coupled receptor 126 (predicted)                                                      | Gpr126_predicted                                        | 1.3 | 0.019245846 | 0.0718139   |
| 1372006_at   | Lysyl oxidase-like 2 (predicted)                                                                | Loxl2_predicted                                         | 1.6 | 0.019262523 | 0.071859827 |
| 1374705_at   | collagen, type IV, alpha 5 (predicted)                                                          | Col4a5_predicted                                        | 2.2 | 0.019305376 | 0.07198342  |
| 1386861_at   | H2A histone family, member Z                                                                    | H2afz                                                   | 1.3 | 0.019313158 | 0.07198342  |
| 1377121_at   | discs, large homolog 5 (Drosophila) (predicted)                                                 | Dlg5_predicted                                          | 1.5 | 0.019343237 | 0.072079193 |
| 1388351_at   | similar to chromosome 13 open reading frame 12 (predicted)                                      | RGD1305831_predicted                                    | 1.3 | 0.019395685 | 0.072193421 |
| 1376533_at   | bromodomain adjacent to zinc finger domain, 2B (predicted)                                      | Baz2b_predicted                                         | 1.5 | 0.019395837 | 0.072193421 |
| 1375892_at   | ELAV (embryonic lethal, abnormal vision, Drosophila)-like 1 (Hu antigen R) (predicted)          | Elavl1_predicted                                        | 1.4 | 0.01942715  | 0.07227726  |
| 1379023_at   | Thioredoxin domain containing 12 (endoplasmic reticulum)                                        | Txn12                                                   | 2.2 | 0.019433844 | 0.072284537 |
| 1371480_at   | RGD1561797 (predicted) /// hypothetical protein LOC686524                                       | LOC686524 /// RGD1561797_predicted                      | 1.4 | 0.019443161 | 0.072284537 |
| 1396947_at   | Leucine-rich repeat-containing G protein-coupled receptor 4                                     | Lgr4                                                    | 1.7 | 0.019456197 | 0.072303552 |
| 1389014_at   | pre-B-cell colony enhancing factor 1                                                            | Pbef1                                                   | 1.4 | 0.019468845 | 0.072320773 |
| 1389289_at   | Ewing sarcoma breakpoint region 1                                                               | Ewsr1                                                   | 1.4 | 0.019478207 | 0.072336319 |
| 1389011_at   | similar to RIKEN cDNA 1110014D18                                                                | RGD1305156                                              | 1.4 | 0.019498502 | 0.072379004 |
| 1374323_at   | BRCA2 and CDKN1A interacting protein (predicted)                                                | Bccip_predicted                                         | 1.4 | 0.019504131 | 0.072380212 |
| 1389563_at   | transmembrane protein 1 (predicted)                                                             | Tmem1_predicted                                         | 1.3 | 0.019516611 | 0.072380924 |
| 1383357_a_at | Transcribed locus                                                                               | ---                                                     | 1.3 | 0.019565096 | 0.072501148 |
| 1389896_at   | Transcribed locus                                                                               | ---                                                     | 1.3 | 0.019613328 | 0.072592264 |
| 1378094_at   | Similar to pleckstrin homology-like domain, family B, member 2                                  | LOC685611                                               | 1.6 | 0.019640395 | 0.072659744 |
| 1378146_at   | Transcribed locus                                                                               | ---                                                     | 1.4 | 0.019653442 | 0.072679573 |
| 1391901_at   | Transcribed locus                                                                               | ---                                                     | 1.3 | 0.019668657 | 0.072715233 |
| 1393101_at   | F-box and leucine-rich repeat protein 10                                                        | Fbxl10                                                  | 1.5 | 0.019676758 | 0.072716122 |
| 1375034_at   | lysophospholipase 3                                                                             | Lypla3                                                  | 1.4 | 0.01967774  | 0.072716122 |
| 1374027_at   | Transcribed locus                                                                               | ---                                                     | 1.3 | 0.019689221 | 0.072742209 |
| 1380744_at   | Transcribed locus                                                                               | ---                                                     | 1.6 | 0.019724589 | 0.072803649 |
| 1394779_at   | Transcribed locus                                                                               | ---                                                     | 1.4 | 0.019749803 | 0.072818822 |
| 1372556_at   | hypothetical protein LOC502374                                                                  | LOC502374                                               | 1.4 | 0.019784865 | 0.072899074 |
| 1390972_at   | Tp53rk binding protein                                                                          | Tprkb                                                   | 1.5 | 0.019817348 | 0.072986058 |
| 1376492_at   | similar to chromosome 16 open reading frame 28 (predicted)                                      | RGD1565247_predicted                                    | 1.3 | 0.019874739 | 0.073131927 |
| 1384355_at   | plexin A2 (predicted)                                                                           | Plna2_predicted                                         | 1.4 | 0.019907375 | 0.073219253 |
| 1389454_at   | programmed cell death 5 (predicted)                                                             | Pcd5_predicted                                          | 1.6 | 0.019949588 | 0.07329856  |
| 1394243_at   | spermine synthase /// similar to spermine synthase (predicted) /// similar to spermine synthase | LOC683008 /// LOC690027 /// RGD155938_predicted /// Sms | 2.5 | 0.019950036 | 0.07329856  |
| 1385476_x_at | stimulated by retinoic acid gene 6 homolog (mouse)                                              | Stra6                                                   | 1.4 | 0.019950078 | 0.07329856  |
| 1370432_at   | POU domain, class 3, transcription factor 1                                                     | Pou3f1                                                  | 4.0 | 0.019952306 | 0.07329856  |
| 1373101_at   | phosphatidylinositol glycan, class K                                                            | Pigk                                                    | 1.3 | 0.019966105 | 0.073304129 |
| 1391370_at   | Transcribed locus                                                                               | ---                                                     | 1.5 | 0.020040354 | 0.073518654 |
| 1384295_at   | heat shock 70kDa protein 14                                                                     | Hspa14                                                  | 1.3 | 0.020042415 | 0.073518654 |
| 1372820_at   | Transcribed locus                                                                               | ---                                                     | 1.4 | 0.020064622 | 0.073523058 |
| 1394160_at   | transmembrane protein 2 (predicted)                                                             | Tmem2_predicted                                         | 1.8 | 0.020069375 | 0.073523058 |
| 1376611_at   | polymerase (DNA directed), alpha 1                                                              | Pola1                                                   | 1.4 | 0.020096174 | 0.073600951 |
| 1393879_at   | Transcribed locus                                                                               | ---                                                     | 1.6 | 0.020103548 | 0.073611565 |
| 1373348_at   | similar to Protein deltex-1 (Deltex-1) (Deltex1) (mDTX1) (FXI-T1)                               | LOC687424                                               | 1.3 | 0.020185908 | 0.073798136 |
| 1378720_at   | GLI-Kruppel family member GLI1                                                                  | Gli1                                                    | 1.4 | 0.020225189 | 0.073925312 |
| 1381840_at   | Electron-transfer-flavoprotein, beta polypeptide                                                | Etfb                                                    | 1.8 | 0.020253585 | 0.073996217 |
| 1387202_at   | intercellular adhesion molecule 1                                                               | Icam1                                                   | 1.5 | 0.02029263  | 0.074073055 |
| 1397179_at   | similar to DIP13 alpha (predicted)                                                              | RGD1309388_predicted                                    | 1.3 | 0.020306653 | 0.074107795 |
| 1386893_at   | granulin                                                                                        | Grn                                                     | 1.5 | 0.020322227 | 0.074130875 |
| 1371583_at   | RNA binding motif protein 3                                                                     | Rbm3                                                    | 1.6 | 0.020326498 | 0.074130875 |

|              |                                                                                                                                        |                                    |     |             |             |
|--------------|----------------------------------------------------------------------------------------------------------------------------------------|------------------------------------|-----|-------------|-------------|
| 1378578_at   | Transcribed locus                                                                                                                      | ---                                | 1.6 | 0.020386576 | 0.074300556 |
| 1371766_at   | Transcribed locus                                                                                                                      | ---                                | 1.3 | 0.020464243 | 0.074457056 |
| 1382258_at   | Rho-guanine nucleotide exchange factor (predicted)                                                                                     | Rgnef_predicted                    | 1.6 | 0.020470258 | 0.074457056 |
| 1383202_at   | similar to U6 snRNA-associated Sm-like protein LSm6 (Sm protein F) (predicted) /// similar to U6 snRNA-associated Sm-like protein LSm6 | LOC684624 /// RGD1561937_predicted | 1.5 | 0.020494379 | 0.074528308 |
| 1394630_at   | LIM domain only 4                                                                                                                      | Lmo4                               | 1.6 | 0.020526931 | 0.074613693 |
| 1367476_at   | signal recognition particle 14 (predicted)                                                                                             | Srp14_predicted                    | 1.3 | 0.020543548 | 0.074657596 |
| 1368252_at   | kelch repeat and BTB (POZ) domain containing 10                                                                                        | Kbtbd10                            | 3.1 | 0.020552218 | 0.074672603 |
| 1370585_a_at | protein kinase C, beta 1                                                                                                               | Prkcb1                             | 1.3 | 0.020583852 | 0.074725507 |
| 1391211_at   | AtPase, class VI, type 11C (predicted)                                                                                                 | Atp11c_predicted                   | 1.4 | 0.020584234 | 0.074725507 |
| 1383905_at   | zinc finger protein 216 (predicted)                                                                                                    | Zfp216_predicted                   | 1.4 | 0.020589494 | 0.074725507 |
| 1373927_at   | high mobility group box 2-like 1 (predicted)                                                                                           | Hmgb2l1_predicted                  | 1.4 | 0.02059669  | 0.074735131 |
| 1371420_at   | 92Aa-Protein                                                                                                                           | LOC494529                          | 1.4 | 0.020703427 | 0.075072742 |
| 1370826_at   | nucleosome assembly protein 1-like 1                                                                                                   | Nap1l1                             | 1.3 | 0.020773858 | 0.075278346 |
| 1386394_at   | ---                                                                                                                                    | ---                                | 1.7 | 0.020822412 | 0.075430429 |
| 1389580_at   | SWI/SNF related, matrix associated, actin dependent regulator of chromatin, subfamily a, member 3 (predicted)                          | Smarca3_predicted                  | 1.3 | 0.020988191 | 0.075887836 |
| 1372814_at   | similar to RIKEN cDNA 2010005O13                                                                                                       | RGD1310623                         | 1.3 | 0.021007439 | 0.075940739 |
| 1393811_at   | similar to putative repair and recombination helicase RAD26L (predicted)                                                               | RGD1561537_predicted               | 1.4 | 0.021100155 | 0.076208904 |
| 1383841_at   | similar to PWWP domain containing 2                                                                                                    | LOC683932                          | 2.0 | 0.021126705 | 0.076288044 |
| 1392231_at   | serine/threonine kinase 4 (predicted)                                                                                                  | Stk4_predicted                     | 1.3 | 0.021131537 | 0.076288746 |
| 1382045_at   | TBC1 domain family, member 15                                                                                                          | Tbc1d15                            | 1.4 | 0.021150634 | 0.076310277 |
| 1380202_at   | ---                                                                                                                                    | ---                                | 2.1 | 0.021155793 | 0.076310277 |
| 1392832_at   | similar to angiotensin-like 1                                                                                                          | LOC679942 /// LOC684489            | 2.1 | 0.021190216 | 0.076399972 |
| 1374687_at   | ---                                                                                                                                    | ---                                | 1.4 | 0.02119615  | 0.076404619 |
| 1374111_at   | similar to Pinin                                                                                                                       | LOC368070                          | 1.3 | 0.021236309 | 0.076501139 |
| 1380195_at   | ATPase, Ca <sup>++</sup> transporting, plasma membrane 1                                                                               | Atp2b1                             | 1.5 | 0.021262603 | 0.076577028 |
| 1393085_at   | similar to hypothetical protein BC018453                                                                                               | RGD1307700                         | 1.5 | 0.021333712 | 0.076763701 |
| 1388874_at   | metastasis suppressor 1 (predicted)                                                                                                    | Mtss1_predicted                    | 1.2 | 0.02133777  | 0.076763701 |
| 1382642_at   | zinc finger protein 281                                                                                                                | Zfp281                             | 1.7 | 0.021384427 | 0.076881106 |
| 1382789_at   | Transcribed locus                                                                                                                      | ---                                | 1.5 | 0.021394792 | 0.076899044 |
| 1383245_at   | MAP3K12 binding inhibitory protein 1 (predicted)                                                                                       | Mbip_predicted                     | 1.3 | 0.021427903 | 0.076953306 |
| 1376102_at   | transmembrane BAX inhibitor motif containing 1                                                                                         | Tmbim1                             | 1.4 | 0.021433412 | 0.076956289 |
| 1375367_at   | PDZ and LIM domain 2                                                                                                                   | Pdlim2                             | 1.5 | 0.021439389 | 0.076960951 |
| 1373957_at   | reelin                                                                                                                                 | Reln                               | 1.6 | 0.02145507  | 0.077000436 |
| 1393046_at   | similar to Protein C20orf20                                                                                                            | RGD1308612                         | 1.7 | 0.021501276 | 0.077115784 |
| 1390404_at   | laminin, alpha 2 (predicted)                                                                                                           | Lama2_predicted                    | 1.6 | 0.021507951 | 0.077122909 |
| 1375652_at   | signal sequence receptor, gamma                                                                                                        | Ssr3                               | 1.2 | 0.021530166 | 0.077185738 |
| 1382447_at   | ---                                                                                                                                    | ---                                | 1.4 | 0.021546261 | 0.077226609 |
| 1373079_at   | Transcribed locus                                                                                                                      | ---                                | 1.2 | 0.021572225 | 0.077282279 |
| 1397855_at   | Transcribed locus                                                                                                                      | ---                                | 1.8 | 0.021575889 | 0.077282279 |
| 1395633_at   | Similar to F-box only protein 3 isoform 1                                                                                              | LOC690634                          | 1.2 | 0.021592536 | 0.077325068 |
| 1372718_at   | similar to anaphase promoting complex subunit 13                                                                                       | LOC683931 /// LOC685029            | 1.5 | 0.021617515 | 0.077397667 |
| 1378275_at   | UPF3 regulator of nonsense transcripts homolog A (yeast)                                                                               | Upf3a                              | 1.5 | 0.021629122 | 0.077422371 |
| 1395871_at   | similar to topoisomerase (DNA) II beta                                                                                                 | LOC361100                          | 1.4 | 0.021744358 | 0.077733363 |
| 1395306_at   | similar to polybromo-1 (predicted)                                                                                                     | RGD1565549_predicted               | 1.2 | 0.021755601 | 0.077749115 |
| 1373453_at   | similar to myocardial ischemic preconditioning upregulated protein 2 (predicted)                                                       | RGD1565589_predicted               | 1.3 | 0.021758219 | 0.077749115 |
| 1368703_at   | PDZ and LIM domain 5                                                                                                                   | Pdlim5                             | 1.4 | 0.021775171 | 0.077775898 |
| 1373944_at   | Transcribed locus                                                                                                                      | ---                                | 1.4 | 0.021798971 | 0.077844001 |
| 1381124_at   | Transcribed locus                                                                                                                      | ---                                | 2.0 | 0.021814853 | 0.077866906 |

|              |                                                                                                                                                                                                            |                                                  |     |             |             |
|--------------|------------------------------------------------------------------------------------------------------------------------------------------------------------------------------------------------------------|--------------------------------------------------|-----|-------------|-------------|
| 1382139_at   | similar to hypothetical protein FLJ12994 (predicted)                                                                                                                                                       | RGD1308795_predicted                             | 1.3 | 0.021822835 | 0.077876934 |
| 1379915_at   | Similar to sorbin and SH3 domain containing 1 isoform 3                                                                                                                                                    | LOC686098                                        | 1.5 | 0.021827132 | 0.077876934 |
| 1371792_at   | ---                                                                                                                                                                                                        | ---                                              | 1.4 | 0.02183403  | 0.07788465  |
| 1378103_at   | similar to DNA (cytosine-5)-methyltransferase 3A (Dnmt3a) (DNA methyltransferase MmullIA) (DNA MTase MmullIA) (M.MmullIA) (predicted)                                                                      | RGD1305891_predicted                             | 2.0 | 0.021840087 | 0.077889364 |
| 1398989_at   | Son cell proliferation protein                                                                                                                                                                             | Son                                              | 1.3 | 0.021850832 | 0.07789178  |
| 1391466_at   | ---                                                                                                                                                                                                        | ---                                              | 1.3 | 0.021867216 | 0.077901662 |
| 1379987_at   | Similar to RIKEN cDNA 6330416G13 gene (predicted)                                                                                                                                                          | RGD1304595_predicted                             | 1.2 | 0.021882499 | 0.077939226 |
| 1381683_at   | chromodomain helicase DNA binding protein 2 (predicted)                                                                                                                                                    | Chd2_predicted                                   | 1.5 | 0.021911453 | 0.078008567 |
| 1374281_at   | similar to KIAA1259 protein (predicted)                                                                                                                                                                    | RGD1310969_predicted                             | 1.3 | 0.021960977 | 0.078106477 |
| 1377156_at   | similar to transcription factor 7-like 2, T-cell specific, HMG-box /// similar to Transcription factor 7-like 2 (HMG box transcription factor 4) (T-cell-specific transcription factor 4) (TCF-4) (hTCF-4) | LOC679869 ///<br>LOC683733                       | 1.5 | 0.021992744 | 0.078179523 |
| 1379195_s_at | ligase I, DNA, ATP-dependent                                                                                                                                                                               | Lig1                                             | 1.7 | 0.02202177  | 0.078265791 |
| 1393836_at   | microphthalmia-associated transcription factor                                                                                                                                                             | Mitf                                             | 1.8 | 0.022039952 | 0.078297781 |
| 1370817_at   | Sec11-like 3 ( <i>S. cerevisiae</i> )                                                                                                                                                                      | Sec113                                           | 1.4 | 0.022052876 | 0.078297781 |
| 1368702_at   | PRKC, apoptosis, WT1, regulator                                                                                                                                                                            | Pawr                                             | 2.7 | 0.022057596 | 0.078297781 |
| 1371986_at   | Transcribed locus                                                                                                                                                                                          | ---                                              | 1.4 | 0.022059333 | 0.078297781 |
| 1376860_at   | ion transporter protein                                                                                                                                                                                    | Nrip                                             | 1.5 | 0.022082061 | 0.078337105 |
| 1393110_at   | Mpv17 transgene, kidney disease mutant-like (predicted)                                                                                                                                                    | Mpv17l_predicted                                 | 1.3 | 0.022128295 | 0.078457901 |
| 1394200_at   | heat shock 70kDa protein 2                                                                                                                                                                                 | Hspa2                                            | 1.4 | 0.022135306 | 0.078465845 |
| 1371856_at   | CDNA clone MGC:93828 IMAGE:7110880                                                                                                                                                                         | ---                                              | 1.5 | 0.022217402 | 0.078704529 |
| 1389255_at   | cadherin 5 (predicted)                                                                                                                                                                                     | Cdh5_predicted                                   | 1.5 | 0.022218192 | 0.078704529 |
| 1392692_at   | Transcribed locus                                                                                                                                                                                          | ---                                              | 1.9 | 0.02222178  | 0.078704529 |
| 1373822_at   | similar to Chain A, Solution Structure Of The Bola-Like Protein From Mus Musculus (predicted) /// similar to RIKEN cDNA 1110025L05 (predicted)                                                             | RGD1309998_predicted ///<br>RGD1565363_predicted | 1.5 | 0.022321634 | 0.079024156 |
| 1380874_at   | Dullard homolog ( <i>Xenopus laevis</i> )                                                                                                                                                                  | Dullard                                          | 1.8 | 0.02235833  | 0.079102991 |
| 1384154_at   | WW domain binding protein 4                                                                                                                                                                                | Wbp4                                             | 2.3 | 0.022369648 | 0.079126016 |
| 1375024_at   | similar to RIKEN cDNA 5230400J09 (predicted)                                                                                                                                                               | RGD1559623_predicted                             | 1.3 | 0.022381917 | 0.079152392 |
| 1376369_at   | trophinin associated protein (tastin) (predicted)                                                                                                                                                          | Troap_predicted                                  | 1.2 | 0.022475609 | 0.079398371 |
| 1385739_at   | Transcribed locus                                                                                                                                                                                          | ---                                              | 1.4 | 0.022523115 | 0.079514959 |
| 1392995_at   | similar to zinc finger protein 322a acidic (leucine-rich) nuclear phosphoprotein 32 family, member E                                                                                                       | LOC680201 ///<br>LOC684943                       | 1.5 | 0.022534384 | 0.079537673 |
| 1372620_at   | acidic (leucine-rich) nuclear phosphoprotein 32 family, member E                                                                                                                                           | Anp32e                                           | 1.4 | 0.022548383 | 0.079570006 |
| 1382550_at   | ---                                                                                                                                                                                                        | ---                                              | 1.3 | 0.022568839 | 0.079608035 |
| 1376195_at   | spindlin /// similar to spindlin                                                                                                                                                                           | LOC682571 /// Spin                               | 1.4 | 0.022579637 | 0.079629047 |
| 1396249_at   | Transcribed locus                                                                                                                                                                                          | ---                                              | 1.4 | 0.022586056 | 0.079634609 |
| 1368226_at   | Nucleoside 2-deoxyribosyltransferase domain containing protein RGD620382                                                                                                                                   | RGD620382                                        | 1.4 | 0.02259464  | 0.079634717 |
| 1390661_at   | WD repeat domain 20                                                                                                                                                                                        | Wdr20                                            | 1.3 | 0.022648355 | 0.07973193  |
| 1396036_at   | Ral GEF with PH domain and SH3 binding motif 2                                                                                                                                                             | Ralgs2                                           | 2.1 | 0.022736061 | 0.079974921 |
| 1373017_at   | succinate-Coenzyme A ligase, GDP-forming, beta subunit                                                                                                                                                     | Suclg2                                           | 1.3 | 0.022741456 | 0.079976795 |
| 1388591_at   | DNA cross-link repair 1B, PSO2 homolog ( <i>S. cerevisiae</i> )                                                                                                                                            | Dclre1b                                          | 1.4 | 0.02281602  | 0.080175526 |
| 1375958_at   | similar to TSC22 domain family protein 4 (TSC22-related-inducible leucine zipper protein 2)                                                                                                                | LOC686226                                        | 2.1 | 0.022816374 | 0.080175526 |
| 1368655_at   | proteoglycan peptide core protein                                                                                                                                                                          | Pgsg                                             | 1.5 | 0.022820369 | 0.080175526 |
| 1373611_at   | interleukin 17 receptor (predicted)                                                                                                                                                                        | Il17r_predicted                                  | 1.3 | 0.022822338 | 0.080175526 |
| 1384501_at   | Transcribed locus                                                                                                                                                                                          | ---                                              | 1.7 | 0.02284429  | 0.080235507 |

|              |                                                                                                                                         |                         |     |             |             |
|--------------|-----------------------------------------------------------------------------------------------------------------------------------------|-------------------------|-----|-------------|-------------|
| 1372760_at   | CDNA clone IMAGE:7321089                                                                                                                | ---                     | 1.4 | 0.022851908 | 0.080245128 |
| 1370827_at   | cytochrome b5 reductase 4                                                                                                               | Cyb5r4                  | 1.5 | 0.022861945 | 0.080263238 |
| 1382001_at   | similar to Myeloid/lymphoid or mixed-lineage leukemia protein 3 homolog (Histone-lysine N-methyltransferase, H3 lysine-4 specific MLL3) | LOC502710 /// LOC679252 | 1.4 | 0.022884516 | 0.080325333 |
| 1390757_at   | similar to cell division cycle 2-like 1 (predicted)                                                                                     | RGD1566355_predicted    | 2.1 | 0.022950996 | 0.080489976 |
| 1397217_at   | CUG triplet repeat, RNA binding protein 2                                                                                               | Cugbp2                  | 1.6 | 0.022972764 | 0.08054914  |
| 1376398_at   | Transcribed locus                                                                                                                       | ---                     | 1.8 | 0.022985979 | 0.080552003 |
| 1383573_at   | serologically defined colon cancer antigen 33 (predicted)                                                                               | Sdccag33_predicted      | 2.0 | 0.022986043 | 0.080552003 |
| 1379810_at   | small inducible cytokine subfamily E, member 1                                                                                          | Scye1                   | 2.0 | 0.022990762 | 0.080552003 |
| 1376193_at   | Kohjirin                                                                                                                                | Chrdl1                  | 1.6 | 0.023139891 | 0.080930287 |
| 1398734_at   | Ankyrin 3, epithelial                                                                                                                   | Ank3                    | 1.5 | 0.023140512 | 0.080930287 |
| 1396581_at   | SCY1-like 2 ( <i>S. cerevisiae</i> ) (predicted)                                                                                        | Scyl2_predicted         | 1.4 | 0.023204406 | 0.081107783 |
| 1370176_at   | trafficking protein, kinesin binding 2                                                                                                  | Trak2                   | 1.4 | 0.02320841  | 0.081107783 |
| 1369705_at   | X transporter protein 3                                                                                                                 | Xtrp3                   | 2.1 | 0.023238911 | 0.081153631 |
| 1373193_at   | Hypothetical protein LOC690089                                                                                                          | LOC690089               | 1.6 | 0.023252693 | 0.081184525 |
| 1375020_at   | Ras and Rab interactor 3 (predicted)                                                                                                    | Rin3_predicted          | 1.3 | 0.023272166 | 0.081218031 |
| 1392493_at   | Potassium channel tetramerisation domain containing 1                                                                                   | Kctd1                   | 1.3 | 0.023279279 | 0.081218341 |
| 1367491_at   | apoptosis inhibitor 5 (predicted)                                                                                                       | Api5_predicted          | 1.3 | 0.02328213  | 0.081218341 |
| 1377263_at   | hepatitis A virus cellular receptor 2                                                                                                   | Havcr2                  | 1.5 | 0.023305076 | 0.081238142 |
| 1382891_at   | similar to ubiquitin specific protease 27, X chromosome (predicted)                                                                     | RGD1564628_predicted    | 1.7 | 0.023308912 | 0.081238142 |
| 1367657_at   | B-cell translocation gene 1, anti-proliferative                                                                                         | Btg1                    | 1.8 | 0.023312502 | 0.081238142 |
| 1379909_at   | G kinase anchoring protein 1                                                                                                            | Gkap1                   | 1.7 | 0.023361516 | 0.081357234 |
| 1388607_at   | SMAD specific E3 ubiquitin protein ligase 2 (predicted)                                                                                 | Smurf2_predicted        | 1.7 | 0.023467894 | 0.081624005 |
| 1376760_at   | similar to GC-rich sequence DNA-binding factor homolog                                                                                  | LOC681004 /// LOC683880 | 2.1 | 0.023516283 | 0.081740454 |
| 1372034_at   | similar to hypothetical protein MGC29390 (predicted)                                                                                    | RGD1310490_predicted    | 2.1 | 0.023528144 | 0.081764401 |
| 1369967_at   | citrate synthase                                                                                                                        | Cs                      | 1.3 | 0.023544612 | 0.081789697 |
| 1399001_at   | hypothetical LOC294030                                                                                                                  | RGD1305481              | 1.4 | 0.023578758 | 0.08188839  |
| 1376710_at   | Hypothetical protein LOC691783                                                                                                          | LOC691783               | 1.5 | 0.023645606 | 0.082085884 |
| 1383939_at   | Transcribed locus                                                                                                                       | ---                     | 1.6 | 0.023670922 | 0.082134846 |
| 1374609_at   | RAB3 GTPase activating protein subunit 2                                                                                                | Rab3gap2                | 1.4 | 0.02367469  | 0.082134846 |
| 1368212_at   | similar to splicing factor p54                                                                                                          | LOC502603               | 1.6 | 0.023684335 | 0.082150978 |
| 1370073_at   | DnaJ (Hsp40) homolog, subfamily C, member 3                                                                                             | Dnajc3                  | 1.6 | 0.023720464 | 0.082214732 |
| 1380713_at   | Transcribed locus                                                                                                                       | ---                     | 1.6 | 0.023727207 | 0.082214732 |
| 1393097_at   | ---                                                                                                                                     | ---                     | 1.4 | 0.023757025 | 0.082298977 |
| 1376935_at   | ---                                                                                                                                     | ---                     | 1.3 | 0.023789468 | 0.082376666 |
| 1375981_a_at | suppressor of variegation 3-9 homolog 1 ( <i>Drosophila</i> ) (predicted)                                                               | Suv39h1_predicted       | 1.5 | 0.023819344 | 0.082445405 |
| 1394961_at   | Transcribed locus                                                                                                                       | ---                     | 1.4 | 0.023825895 | 0.08245073  |
| 1376182_at   | Transcribed locus, weakly similar to NP_066564.1 general control of amino-acid synthesis 5-like 2 [ <i>Homo sapiens</i> ]               | ---                     | 1.8 | 0.023998316 | 0.082960132 |
| 1388581_at   | hematological and neurological expressed sequence 1                                                                                     | Hn1                     | 1.4 | 0.024010002 | 0.082969013 |
| 1388672_at   | Transcribed locus                                                                                                                       | ---                     | 1.2 | 0.024012687 | 0.082969013 |
| 1398317_at   | bisphosphate 3'-nucleotidase 1                                                                                                          | Bpnt1                   | 1.3 | 0.024025385 | 0.082983943 |
| 1380191_s_at | thioredoxin-like 1                                                                                                                      | Txn1                    | 1.3 | 0.024051362 | 0.08303879  |
| 1377148_at   | ---                                                                                                                                     | ---                     | 1.4 | 0.024065253 | 0.083069314 |
| 1379386_at   | similar to B99 protein (predicted)                                                                                                      | RGD1563164_predicted    | 1.2 | 0.024100245 | 0.083131787 |
| 1373881_at   | Rho, GDP dissociation inhibitor (GDI) beta                                                                                              | Arhgdib                 | 1.6 | 0.024103568 | 0.083131787 |
| 1399141_at   | CDC like kinase 4                                                                                                                       | Cik4                    | 1.4 | 0.024115868 | 0.083156769 |
| 1383500_at   | ribosome binding protein 1 homolog 180kDa ( <i>dog</i> ) (predicted)                                                                    | Rrbp1_predicted         | 1.8 | 0.024149806 | 0.083238896 |
| 1395110_at   | Transcribed locus                                                                                                                       | ---                     | 1.9 | 0.024166233 | 0.083260619 |

|              |                                                                                                             |                            |     |             |             |
|--------------|-------------------------------------------------------------------------------------------------------------|----------------------------|-----|-------------|-------------|
| 1377909_at   | Transcribed locus                                                                                           | ---                        | 1.9 | 0.024184879 | 0.083307411 |
| 1371867_at   | Transcribed locus                                                                                           | ---                        | 1.3 | 0.024199809 | 0.083341385 |
| 1391654_at   | ---                                                                                                         | ---                        | 1.4 | 0.024212676 | 0.083350794 |
| 1392846_at   | Zinc finger, MYND domain containing 11                                                                      | Zmynd11                    | 1.9 | 0.024221874 | 0.083365009 |
| 1378691_at   | ---                                                                                                         | ---                        | 1.4 | 0.024283492 | 0.08354212  |
| 1368204_at   | ligase I, DNA, ATP-dependent                                                                                | Lig1                       | 1.2 | 0.024335411 | 0.083650751 |
| 1374667_at   | CDNA clone IMAGE:7302289                                                                                    | ---                        | 1.3 | 0.024357059 | 0.083674378 |
| 1391904_at   | Transcribed locus                                                                                           | ---                        | 1.6 | 0.024357546 | 0.083674378 |
| 1389716_at   | centrosomal protein 27 (predicted)                                                                          | Cep27_predicted            | 1.3 | 0.024420236 | 0.083854705 |
| 1397652_at   | Transcribed locus                                                                                           | ---                        | 1.9 | 0.024463888 | 0.083921194 |
| 1382582_at   | Transcribed locus                                                                                           | ---                        | 1.4 | 0.02446511  | 0.083921194 |
| 1372785_at   | ash1 (absent, small, or homeotic)-like (Drosophila) (predicted)                                             | Ash1_predicted             | 1.8 | 0.024478338 | 0.083949064 |
| 1370940_at   | tight junction protein 2                                                                                    | Tjp2                       | 1.6 | 0.024531528 | 0.084078886 |
| 1372622_at   | similar to RIKEN cDNA 6530418L21 (predicted)                                                                | RGD1560778_predicted       | 1.5 | 0.024640959 | 0.084366047 |
| 1383724_at   | Heparan sulfate 2-O-sulfotransferase 1                                                                      | Hs2st1                     | 1.4 | 0.024676995 | 0.084454269 |
| 1399077_at   | similar to Metaxin 1, isoform 2                                                                             | LOC295241                  | 1.2 | 0.024696201 | 0.084502417 |
| 1382146_at   | tetraspanin 6                                                                                               | Tspan6                     | 1.3 | 0.024760561 | 0.084687402 |
| 1373683_at   | fyn proto-oncogene                                                                                          | Fyn                        | 1.4 | 0.024780379 | 0.084737561 |
| 1398309_at   | phosphatidylinositol glycan, class L                                                                        | Pigl                       | 1.3 | 0.024881044 | 0.085033005 |
| 1394585_at   | Similar to RIKEN cDNA G430041M01 (predicted)                                                                | RGD1562563_predicted       | 1.8 | 0.025022184 | 0.08544005  |
| 1383951_at   | similar to hypothetical protein FLJ31951 (predicted)                                                        | RGD1309561_predicted       | 1.3 | 0.025024095 | 0.08544005  |
| 1376321_at   | family with sequence similarity 38, member A (predicted)                                                    | Fam38a_predicted           | 1.7 | 0.025026953 | 0.08544005  |
| 1372298_at   | thioredoxin domain containing 4 (endoplasmic reticulum)                                                     | Txndc4                     | 1.3 | 0.025032563 | 0.08544005  |
| 1383491_at   | interferon stimulated exonuclease gene 20-like 1 (predicted)                                                | Isg20l1_predicted          | 1.3 | 0.025044018 | 0.085461413 |
| 1384523_at   | similar to postmeiotic segregation increased 1                                                              | MGC72584                   | 1.6 | 0.025090619 | 0.085575671 |
| 1371864_at   | Transcribed locus                                                                                           | ---                        | 1.5 | 0.025093109 | 0.085575671 |
| 1376437_at   | similar to Der1-like domain family, member 2                                                                | LOC687738 ///<br>LOC691956 | 1.5 | 0.025149217 | 0.085749238 |
| 1372338_at   | similar to CG9240-PA                                                                                        | LOC687395                  | 1.3 | 0.025165958 | 0.085760187 |
| 1382056_at   | similar to splicing factor p54                                                                              | LOC502603                  | 1.7 | 0.025191007 | 0.085785028 |
| 1379362_at   | Transcribed locus                                                                                           | ---                        | 1.6 | 0.025199794 | 0.085797186 |
| 1395940_at   | 1-acylglycerol-3-phosphate O-acyltransferase 5 (lysophosphatidic acid acyltransferase, epsilon) (predicted) | Agpat5_predicted           | 1.8 | 0.025218084 | 0.085841688 |
| 1385931_at   | hook homolog 3 (Drosophila)                                                                                 | Hook3                      | 1.6 | 0.025358714 | 0.08619851  |
| 1397874_at   | Similar to U7 snRNA-associated Sm-like protein Lsm11 (predicted)                                            | RGD1565523_predicted       | 1.3 | 0.025385843 | 0.086238626 |
| 1373648_at   | similar to Protein C6orf142 homolog                                                                         | LOC681849                  | 1.5 | 0.025433415 | 0.086344709 |
| 1397197_at   | Serine incorporator 3                                                                                       | Serinc3                    | 1.5 | 0.025436341 | 0.086344709 |
| 1392341_at   | Calpain, small subunit 1                                                                                    | Capns1                     | 1.2 | 0.025443059 | 0.086344709 |
| 1398573_at   | zinc finger protein 307                                                                                     | Zfp307                     | 1.3 | 0.025489478 | 0.086479155 |
| 1370913_at   | Best5 protein                                                                                               | Best5                      | 2.3 | 0.025565364 | 0.086667457 |
| 1372538_at   | solute carrier family 25 (mitochondrial carrier, peroxisomal membrane protein), member 17 (predicted)       | Slc25a17_predicted         | 1.3 | 0.025566057 | 0.086667457 |
| 1383880_at   | integrin alpha V (predicted)                                                                                | Ilgav_predicted            | 1.3 | 0.025636332 | 0.086869877 |
| 1374870_at   | Procollagen, type XXVII, alpha 1                                                                            | Col27a1                    | 1.6 | 0.025675591 | 0.086971889 |
| 1371379_at   | similar to Brain protein 44 (predicted)                                                                     | RGD1563422_predicted       | 1.4 | 0.02567758  | 0.086971889 |
| 1377844_at   | zinc binding alcohol dehydrogenase, domain containing 1                                                     | Zadh1                      | 1.3 | 0.0256823   | 0.086971889 |
| 1385101_a_at | similar to RIKEN cDNA 0610011N22 gene                                                                       | RGD735106                  | 1.4 | 0.025711276 | 0.086998315 |
| 1398992_at   | Transcribed locus                                                                                           | ---                        | 1.4 | 0.025714868 | 0.086998315 |
| 1382190_at   | MAS-related GPR, member F                                                                                   | Mrgprf                     | 1.4 | 0.025727082 | 0.08701605  |
| 1368199_at   | nucleoporin 88                                                                                              | Nup88                      | 1.3 | 0.02580275  | 0.087200254 |
| 1388828_at   | SID1 transmembrane family, member 2 (predicted)                                                             | Sidt2_predicted            | 1.4 | 0.02583502  | 0.087291374 |
| 1381262_at   | Pre-B-cell leukemia transcription factor interacting protein 1                                              | Pbxip1                     | 1.6 | 0.025879885 | 0.087405679 |

|              |                                                                                                                                                                                                                                                                                                         |                                                                                                                                                                                                                                                  |     |             |             |
|--------------|---------------------------------------------------------------------------------------------------------------------------------------------------------------------------------------------------------------------------------------------------------------------------------------------------------|--------------------------------------------------------------------------------------------------------------------------------------------------------------------------------------------------------------------------------------------------|-----|-------------|-------------|
| 1379460_at   | similar to RIKEN cDNA 3110007P09 (predicted)                                                                                                                                                                                                                                                            | RGD1564957_predicted                                                                                                                                                                                                                             | 1.4 | 0.025885387 | 0.087405679 |
| 1377282_at   | Protein phosphatase 3, catalytic subunit, alpha isoform                                                                                                                                                                                                                                                 | Ppp3ca                                                                                                                                                                                                                                           | 1.3 | 0.025890106 | 0.087405679 |
| 1383621_at   | Membrane-bound transcription factor peptidase, site 2                                                                                                                                                                                                                                                   | Mbtps2                                                                                                                                                                                                                                           | 1.3 | 0.025926281 | 0.087465891 |
| 1384882_at   | HECT domain containing 2 (predicted)                                                                                                                                                                                                                                                                    | Hectd2_predicted                                                                                                                                                                                                                                 | 1.4 | 0.025977447 | 0.087573024 |
| 1385856_at   | RIO kinase 1 (yeast)                                                                                                                                                                                                                                                                                    | Riok1                                                                                                                                                                                                                                            | 1.4 | 0.025982269 | 0.087573024 |
| 1383138_at   | slingshot homolog 3 (Drosophila)                                                                                                                                                                                                                                                                        | Ssh3                                                                                                                                                                                                                                             | 1.4 | 0.026028321 | 0.08771027  |
| 1375343_at   | Transcribed locus                                                                                                                                                                                                                                                                                       | ---                                                                                                                                                                                                                                              | 1.5 | 0.026069093 | 0.087776875 |
| 1397545_at   | Transcribed locus                                                                                                                                                                                                                                                                                       | ---                                                                                                                                                                                                                                              | 1.2 | 0.026069433 | 0.087776875 |
| 1384505_at   | Transcribed locus                                                                                                                                                                                                                                                                                       | ---                                                                                                                                                                                                                                              | 1.4 | 0.026121637 | 0.087862717 |
| 1393008_at   | CAMP-regulated phosphoprotein 19                                                                                                                                                                                                                                                                        | Arpp19                                                                                                                                                                                                                                           | 1.3 | 0.026146941 | 0.087911873 |
| 1376966_at   | Transcribed locus                                                                                                                                                                                                                                                                                       | ---                                                                                                                                                                                                                                              | 1.3 | 0.026184308 | 0.088019516 |
| 1374809_at   | Transcribed locus                                                                                                                                                                                                                                                                                       | ---                                                                                                                                                                                                                                              | 1.3 | 0.026199678 | 0.088045102 |
| 1383989_at   | SRY-box containing gene 4 (predicted)                                                                                                                                                                                                                                                                   | Sox4_predicted                                                                                                                                                                                                                                   | 1.2 | 0.02622027  | 0.088086398 |
| 1377704_at   | male-specific lethal 2-like 1 (Drosophila) (predicted)                                                                                                                                                                                                                                                  | Msl2l1_predicted                                                                                                                                                                                                                                 | 1.7 | 0.02624403  | 0.088148213 |
| 1373225_at   | Transcribed locus                                                                                                                                                                                                                                                                                       | ---                                                                                                                                                                                                                                              | 1.5 | 0.026379817 | 0.088526481 |
| 1367500_at   | similar to 26 proteasome complex subunit DSS1 (Deleted in split hand/split foot protein 1) (Split hand/foot deleted protein 1 homolog)                                                                                                                                                                  | LOC679014 ///<br>LOC680532                                                                                                                                                                                                                       | 1.5 | 0.026383361 | 0.088526481 |
| 1385033_at   | Transcribed locus                                                                                                                                                                                                                                                                                       | ---                                                                                                                                                                                                                                              | 1.4 | 0.026383561 | 0.088526481 |
| 1379444_at   | Transcribed locus                                                                                                                                                                                                                                                                                       | ---                                                                                                                                                                                                                                              | 2.2 | 0.026426245 | 0.088614797 |
| 1389668_at   | spindle pole body component 25 homolog (S. cerevisiae)                                                                                                                                                                                                                                                  | Spbc25                                                                                                                                                                                                                                           | 1.4 | 0.026472038 | 0.088678633 |
| 1368273_at   | mitogen-activated protein kinase 6                                                                                                                                                                                                                                                                      | Mapk6                                                                                                                                                                                                                                            | 1.2 | 0.026573885 | 0.088965449 |
| 1373002_at   | mitochondrial ribosomal protein S9                                                                                                                                                                                                                                                                      | Mrps9                                                                                                                                                                                                                                            | 1.3 | 0.026585219 | 0.088985282 |
| 1367709_at   | CD63 antigen                                                                                                                                                                                                                                                                                            | Cd63                                                                                                                                                                                                                                             | 1.7 | 0.026611352 | 0.089054631 |
| 1376087_at   | similar to RIKEN cDNA 1300010M03 (predicted)                                                                                                                                                                                                                                                            | RGD1561189_predicted                                                                                                                                                                                                                             | 1.5 | 0.026649983 | 0.089165771 |
| 1368042_a_at | high mobility group box 1 /// similar to High mobility group protein 1 (HMG-1) (predicted) /// similar to Hmgb1 protein (predicted) /// hypothetical protein LOC678705 /// similar to High mobility group protein 1 (HMG-1) (High mobility group protein B1) (Amphoterin) (Heparin-binding protein p30) | Hmgb1 /// LOC678705 ///<br>LOC679451 ///<br>LOC679571 ///<br>LOC680054 ///<br>LOC680765 ///<br>LOC680968 ///<br>LOC681718 ///<br>LOC685520 ///<br>RGD1562312_predicted<br>ed ///<br>RGD1563012_predicted<br>ed ///<br>RGD1563786_predicted<br>ed | 1.7 | 0.026674123 | 0.08922597  |
| 1383965_at   | similar to SMP3 mannosyltransferase /// similar to nuclear cap binding protein subunit 2                                                                                                                                                                                                                | LOC684506 ///<br>LOC689116                                                                                                                                                                                                                       | 1.2 | 0.026683586 | 0.08922597  |
| 1395836_at   | Odd Oz/ten-m homolog 2 (Drosophila)                                                                                                                                                                                                                                                                     | Odz2                                                                                                                                                                                                                                             | 1.7 | 0.026722072 | 0.089316121 |
| 1391372_at   | Dolichol-phosphate (beta-D) mannosyltransferase 1 (predicted)                                                                                                                                                                                                                                           | Dpm1_predicted                                                                                                                                                                                                                                   | 1.7 | 0.026762799 | 0.089434075 |
| 1371395_at   | chromobox homolog 3 (HP1 gamma homolog, Drosophila)                                                                                                                                                                                                                                                     | Cbx3                                                                                                                                                                                                                                             | 1.2 | 0.026835894 | 0.089660124 |
| 1373768_at   | BMS1-like, ribosome assembly protein (yeast)                                                                                                                                                                                                                                                            | Bms1l                                                                                                                                                                                                                                            | 1.3 | 0.026917152 | 0.089859698 |
| 1396737_at   | similar to RIKEN cDNA 4931400A14 (predicted)                                                                                                                                                                                                                                                            | RGD1307234_predicted                                                                                                                                                                                                                             | 2.2 | 0.026917481 | 0.089859698 |
| 1368353_at   | glial fibrillary acidic protein                                                                                                                                                                                                                                                                         | Gfap                                                                                                                                                                                                                                             | 2.6 | 0.026964025 | 0.0899603   |
| 1373810_at   | phospholipase A2, group X1IA (predicted)                                                                                                                                                                                                                                                                | Pla2g12a_predicted                                                                                                                                                                                                                               | 1.5 | 0.026990312 | 0.09002974  |
| 1390848_at   | RNA binding motif protein 19 (predicted) /// similar to RNA binding motif protein 19                                                                                                                                                                                                                    | LOC687727 ///<br>Rbm19_predicted                                                                                                                                                                                                                 | 1.4 | 0.027042594 | 0.090167562 |
| 1395699_at   | RIO kinase 3 (yeast) (predicted)                                                                                                                                                                                                                                                                        | Riok3_predicted                                                                                                                                                                                                                                  | 1.3 | 0.027114494 | 0.090315756 |
| 1375067_at   | Transcribed locus                                                                                                                                                                                                                                                                                       | ---                                                                                                                                                                                                                                              | 1.2 | 0.027171754 | 0.090416693 |
| 1386938_at   | alanyl (membrane) aminopeptidase                                                                                                                                                                                                                                                                        | Anpep                                                                                                                                                                                                                                            | 1.5 | 0.027172781 | 0.090416693 |

|              |                                                                                                                                                                                                                                                                                                                                                                         |                                                            |     |             |             |
|--------------|-------------------------------------------------------------------------------------------------------------------------------------------------------------------------------------------------------------------------------------------------------------------------------------------------------------------------------------------------------------------------|------------------------------------------------------------|-----|-------------|-------------|
| 1392550_at   | similar to dapper 1 (predicted)                                                                                                                                                                                                                                                                                                                                         | RGD1564008_predicted                                       | 1.7 | 0.02717778  | 0.090416693 |
| 1397944_at   | Transcribed locus                                                                                                                                                                                                                                                                                                                                                       | ---                                                        | 2.4 | 0.027204112 | 0.090463047 |
| 1371745_at   | hypothetical LOC300361                                                                                                                                                                                                                                                                                                                                                  | RGD1310669                                                 | 1.3 | 0.02722079  | 0.090468288 |
| 1389110_at   | ---                                                                                                                                                                                                                                                                                                                                                                     | ---                                                        | 1.5 | 0.027245026 | 0.090517115 |
| 1396641_at   | ---                                                                                                                                                                                                                                                                                                                                                                     | ---                                                        | 1.4 | 0.027251991 | 0.090517115 |
| 1388571_at   | Synaptogyrin 2                                                                                                                                                                                                                                                                                                                                                          | Syng2                                                      | 1.4 | 0.027311892 | 0.090629923 |
| 1387897_at   | cyclic nucleotide phosphodiesterase 1                                                                                                                                                                                                                                                                                                                                   | Cnp1                                                       | 1.5 | 0.027344985 | 0.090697785 |
| 1377998_at   | coproporphyrinogen oxidase                                                                                                                                                                                                                                                                                                                                              | Cpox                                                       | 1.5 | 0.027377284 | 0.090786606 |
| 1385349_at   | similar to centrin 4                                                                                                                                                                                                                                                                                                                                                    | LOC684095                                                  | 1.3 | 0.027398951 | 0.090840142 |
| 1392548_at   | similar to mKIAA1604 protein (predicted)                                                                                                                                                                                                                                                                                                                                | RGD1565385_predicted                                       | 1.4 | 0.027459516 | 0.090959828 |
| 1375630_at   | similar to NHP2-like protein 1 (High mobility group-like nuclear protein 2 homolog 1) ([U4/U6.U5] tri-snRNP 15.5 kDa protein) (OTK27)                                                                                                                                                                                                                                   | MGC72932                                                   | 1.2 | 0.027462701 | 0.090959828 |
| 1373804_at   | forkhead box P1                                                                                                                                                                                                                                                                                                                                                         | Foxp1                                                      | 1.6 | 0.027496188 | 0.091015758 |
| 1388316_at   | RGD1566320 (predicted)                                                                                                                                                                                                                                                                                                                                                  | RGD1566320_predicted                                       | 1.3 | 0.027514126 | 0.091052814 |
| 1368332_at   | guanylate nucleotide binding protein 2                                                                                                                                                                                                                                                                                                                                  | Gbp2                                                       | 3.5 | 0.02752776  | 0.091052814 |
| 1376438_at   | Ubiquitin-conjugating enzyme E2E 2 (UBC4/5 homolog, yeast)                                                                                                                                                                                                                                                                                                              | Ube2e2                                                     | 1.7 | 0.0275327   | 0.091052814 |
| 1370284_at   | ATP synthase, H+ transporting, mitochondrial F1 complex, epsilon subunit                                                                                                                                                                                                                                                                                                | Atp5e                                                      | 1.3 | 0.027543847 | 0.091054542 |
| 1392853_at   | ---                                                                                                                                                                                                                                                                                                                                                                     | ---                                                        | 1.3 | 0.027616813 | 0.09119481  |
| 1392488_at   | similar to hypothetical protein MGC32132 (predicted)                                                                                                                                                                                                                                                                                                                    | RGD1307915_predicted                                       | 1.3 | 0.02764146  | 0.091257874 |
| 1387446_at   | core 1 UDP-galactose:N-acetylgalactosamine-alpha-R beta 1,3-galactosyltransferase                                                                                                                                                                                                                                                                                       | C1galt1                                                    | 1.5 | 0.027675188 | 0.091332563 |
| 1368279_at   | myeloid/lymphoid or mixed-lineage leukemia, translocated to, 3 (trithorax homolog, Drosophila)                                                                                                                                                                                                                                                                          | Mllt3                                                      | 1.6 | 0.027718409 | 0.091420172 |
| 1384519_at   | SEC63-like (S. cerevisiae) (predicted)                                                                                                                                                                                                                                                                                                                                  | Sec63_predicted                                            | 1.3 | 0.027790676 | 0.091592188 |
| 1374465_at   | ubiquitously expressed transcript                                                                                                                                                                                                                                                                                                                                       | Uxt                                                        | 1.4 | 0.027794017 | 0.091592188 |
| 1394109_at   | Thrombospondin 1                                                                                                                                                                                                                                                                                                                                                        | Thbs1                                                      | 2.5 | 0.027807484 | 0.091592188 |
| 1396150_at   | claudin 1                                                                                                                                                                                                                                                                                                                                                               | Cldn1                                                      | 1.9 | 0.027809545 | 0.091592188 |
| 1388038_at   | attractin                                                                                                                                                                                                                                                                                                                                                               | Atrn                                                       | 1.4 | 0.02785715  | 0.091730612 |
| 1373696_at   | ---                                                                                                                                                                                                                                                                                                                                                                     | ---                                                        | 1.4 | 0.027873394 | 0.091747364 |
| 1383214_at   | USP6 N-terminal like (predicted)                                                                                                                                                                                                                                                                                                                                        | Usp6n_predicted                                            | 1.7 | 0.027912842 | 0.09185883  |
| 1372901_at   | similar to RIKEN cDNA 8030451K01 (predicted)                                                                                                                                                                                                                                                                                                                            | RGD1565414_predicted                                       | 1.4 | 0.028032357 | 0.092119875 |
| 1376457_at   | Transcribed locus                                                                                                                                                                                                                                                                                                                                                       | ---                                                        | 1.6 | 0.028041908 | 0.092119875 |
| 1378620_at   | Transcribed locus                                                                                                                                                                                                                                                                                                                                                       | ---                                                        | 1.3 | 0.028048172 | 0.092119875 |
| 1385909_at   | Transcribed locus                                                                                                                                                                                                                                                                                                                                                       | ---                                                        | 1.3 | 0.028058313 | 0.092134785 |
| 1390492_a_at | ubiquitin specific protease 40                                                                                                                                                                                                                                                                                                                                          | Usp40                                                      | 1.3 | 0.028065687 | 0.092135453 |
| 1375068_at   | similar to surfeit 5 isoform b (predicted)                                                                                                                                                                                                                                                                                                                              | RGD1564893_predicted                                       | 1.7 | 0.02812371  | 0.092239039 |
| 1370262_at   | metadherin                                                                                                                                                                                                                                                                                                                                                              | Mtdh                                                       | 1.9 | 0.028136493 | 0.092262568 |
| 1391915_at   | heat shock 70kDa protein 9A (predicted) /// similar to Stress-70 protein, mitochondrial precursor (75 kDa glucose-regulated protein) (GRP 75) (Peptide-binding protein 74) (PBP74) (P66 MOT) (Mortalin) /// similar to Stress-70 protein, mitochondrial precursor (75 kDa glucose regulated protein) (GRP 75) (Peptide-binding protein 74) (PBP74) (MTHSP70) (Mortalin) | Hspa9a_predicted /// LOC295778 /// LOC500372 /// LOC502646 | 1.8 | 0.028157609 | 0.092305275 |
| 1372068_at   | zinc finger, MYND domain containing 11                                                                                                                                                                                                                                                                                                                                  | Zmynd11                                                    | 1.3 | 0.028160741 | 0.092305275 |
| 1382092_at   | similar to PHD finger protein 20-like 1 isoform 1                                                                                                                                                                                                                                                                                                                       | LOC314964                                                  | 1.5 | 0.028181639 | 0.092352942 |
| 1376591_a_at | hypothetical protein LOC686471 /// hypothetical protein LOC690263                                                                                                                                                                                                                                                                                                       | LOC686471 /// LOC690263                                    | 1.3 | 0.028193379 | 0.09235704  |
| 1372309_at   | LUC7-like 2 (S. cerevisiae) (predicted)                                                                                                                                                                                                                                                                                                                                 | Luc7l2_predicted                                           | 1.4 | 0.028250781 | 0.09248982  |
| 1394086_at   | SUMO1/sentrin specific protease 7 (predicted)                                                                                                                                                                                                                                                                                                                           | Senp7_predicted                                            | 1.3 | 0.028274009 | 0.092536112 |
| 1387905_at   | J domain protein 1                                                                                                                                                                                                                                                                                                                                                      | LOC619393                                                  | 1.2 | 0.028276173 | 0.092536112 |



|              |                                                                                                                        |                                  |     |             |             |
|--------------|------------------------------------------------------------------------------------------------------------------------|----------------------------------|-----|-------------|-------------|
| 1391014_at   | zinc finger, MYND domain containing 19                                                                                 | Zmynd19                          | 1.5 | 0.028309359 | 0.092626285 |
| 1379868_at   | pre-B-cell leukemia transcription factor interacting protein 1                                                         | Pbxip1                           | 1.3 | 0.0283188   | 0.092638747 |
| 1379941_at   | similar to vacuolar protein sorting 13C protein (predicted)                                                            | RGD1560364_predicted             | 1.3 | 0.028352283 | 0.092692973 |
| 1367686_at   | ribosome associated membrane protein 4                                                                                 | RAMP4                            | 1.4 | 0.02835826  | 0.092694089 |
| 1375442_at   | M-phase phosphoprotein 10 (U3 small nucleolar ribonucleoprotein) (predicted)                                           | Mphosph10_predicted              | 1.9 | 0.028375571 | 0.092732245 |
| 1378361_at   | chromodomain helicase DNA binding protein 7 (predicted)                                                                | Chd7_predicted                   | 2.2 | 0.02839183  | 0.092766949 |
| 1372533_at   | similar to mKIAA0212 protein (predicted)                                                                               | RGD1563633_predicted             | 1.2 | 0.028409501 | 0.092806252 |
| 1379059_at   | ---                                                                                                                    | ---                              | 1.6 | 0.02846218  | 0.092852485 |
| 1387262_at   | Sjogren syndrome antigen B                                                                                             | Ssb                              | 1.3 | 0.028496019 | 0.092904365 |
| 1398354_at   | catenin (cadherin associated protein), alpha-like 1 (predicted)                                                        | Ctnnal1_predicted                | 1.4 | 0.028514883 | 0.092917696 |
| 1375396_at   | pumilio 1 (Drosophila) (predicted)                                                                                     | Pum1_predicted                   | 1.3 | 0.028518405 | 0.092917696 |
| 1384323_at   | proteasome (prosome, macropain) 26S subunit, ATPase, 6                                                                 | Psmc6                            | 1.4 | 0.028522705 | 0.092917696 |
| 1380192_at   | similar to F-box protein FBL2                                                                                          | RGD1308119                       | 1.6 | 0.028579786 | 0.093048362 |
| 1369588_a_at | ATPase inhibitory factor 1                                                                                             | Atpiif1                          | 1.5 | 0.028585839 | 0.093049649 |
| 1380327_at   | Glutamate receptor interacting protein 1                                                                               | Grip1                            | 1.3 | 0.028594731 | 0.093060179 |
| 1385641_at   | ---                                                                                                                    | ---                              | 1.3 | 0.028620193 | 0.093124616 |
| 1377069_at   | ---                                                                                                                    | ---                              | 2.0 | 0.028626637 | 0.09312716  |
| 1373445_at   | nucleolar protein 8 (predicted)                                                                                        | Nol8_predicted                   | 1.7 | 0.028653825 | 0.093197175 |
| 1374397_at   | eukaryotic translation initiation factor 2, subunit 2 (beta)                                                           | Eif2s2                           | 1.4 | 0.02866343  | 0.093209982 |
| 1371921_at   | catenin (cadherin-associated protein), alpha 1                                                                         | Catna1                           | 1.3 | 0.028715275 | 0.09336012  |
| 1390305_at   | protein kinase C binding protein 1                                                                                     | Prkcbp1                          | 1.2 | 0.028746536 | 0.093432381 |
| 1375887_at   | Transcribed locus                                                                                                      | ---                              | 1.2 | 0.028748862 | 0.093432381 |
| 1372873_at   | F-box protein 38 (predicted)                                                                                           | Fbxo38_predicted                 | 1.3 | 0.028760503 | 0.09343329  |
| 1367590_at   | RAN, member RAS oncogene family                                                                                        | Ran                              | 1.2 | 0.028822347 | 0.093578753 |
| 1393821_at   | similar to CG9047-PA, isoform A                                                                                        | LOC681715 ///<br>LOC689576       | 1.4 | 0.028853624 | 0.093650055 |
| 1373011_at   | hypothetical protein LOC619558                                                                                         | LOC619558                        | 1.3 | 0.028857146 | 0.093650055 |
| 1373608_at   | Transcribed locus                                                                                                      | ---                              | 1.7 | 0.028868015 | 0.093653079 |
| 1384349_at   | pogo transposable element with ZNF domain (predicted)                                                                  | Pogz_predicted                   | 1.3 | 0.028891313 | 0.093691704 |
| 1393390_at   | Similar to src homology 2 domain-containing transforming protein D                                                     | LOC316507                        | 1.4 | 0.028970699 | 0.093893609 |
| 1396425_at   | Transcribed locus                                                                                                      | ---                              | 1.6 | 0.028986065 | 0.093906399 |
| 1371771_at   | perlecan                                                                                                               | LOC313641                        | 1.4 | 0.02904467  | 0.094022186 |
| 1399119_at   | Transcribed locus                                                                                                      | ---                              | 1.4 | 0.029164039 | 0.094334339 |
| 1374376_at   | Rho-guanine nucleotide exchange factor (predicted)                                                                     | Rgnef_predicted                  | 1.6 | 0.029219609 | 0.094469205 |
| 1384214_a_at | cyclin T2 (predicted)                                                                                                  | Ccnt2_predicted                  | 1.4 | 0.02923911  | 0.094469205 |
| 1388397_at   | EBNA1 binding protein 2                                                                                                | Ebna1bp2                         | 1.4 | 0.029240195 | 0.094469205 |
| 1389136_at   | protein-kinase, interferon-inducible double stranded RNA dependent inhibitor, repressor of (P58 repressor) (predicted) | Prkrir_predicted                 | 1.4 | 0.029264443 | 0.094510419 |
| 1367993_at   | restin (Reed-Steinberg cell-expressed intermediate filament-associated protein)                                        | Rsn                              | 1.5 | 0.029289577 | 0.094554458 |
| 1383948_at   | similar to TPR repeat-containing protein KIAA1043                                                                      | LOC304558                        | 1.7 | 0.029300856 | 0.094572306 |
| 1383579_at   | Transcribed locus, moderately similar to XP_577744.1 similar to IKEN cDNA 6720480D16 [Rattus norvegicus]               | ---                              | 1.4 | 0.029372667 | 0.094766895 |
| 1381696_at   | Similar to hypothetical protein FLJ31606 (predicted)                                                                   | RGD1561507_predicted             | 1.5 | 0.029435606 | 0.094858317 |
| 1372162_at   | acyl-CoA synthetase short-chain family member 1 (predicted) /// similar to acetyl-CoA synthetase 2-like                | Acss1_predicted ///<br>LOC681886 | 1.3 | 0.029605236 | 0.095222012 |
| 1388553_at   | hypothetical LOC290577                                                                                                 | LOC290577                        | 1.2 | 0.029606357 | 0.095222012 |
| 1383929_at   | Transcribed locus                                                                                                      | ---                              | 1.3 | 0.029621748 | 0.095252884 |

|              |                                                                                                                |                            |     |             |             |
|--------------|----------------------------------------------------------------------------------------------------------------|----------------------------|-----|-------------|-------------|
| 1379235_x_at | similar to cell division cycle 45 homolog (S. cerevisiae)-like                                                 | LOC287961                  | 1.3 | 0.029654252 | 0.095282895 |
| 1389092_at   | interleukin 2 receptor, gamma (severe combined immunodeficiency)                                               | Il2rg                      | 1.6 | 0.029667439 | 0.095306648 |
| 1385765_at   | similar to lin-9 homolog (C. elegans)                                                                          | LOC360888                  | 1.4 | 0.029690728 | 0.095332366 |
| 1376832_at   | ---                                                                                                            | ---                        | 1.2 | 0.029692833 | 0.095332366 |
| 1380938_at   | receptor interacting protein kinase 5                                                                          | Ripk5                      | 1.7 | 0.029719548 | 0.095399516 |
| 1368393_at   | complement component 1, q subcomponent, receptor 1                                                             | C1qr1                      | 1.3 | 0.029766982 | 0.095495869 |
| 1376447_at   | similar to hypothetical protein A430110N23 (predicted)                                                         | RGD1565772_predicted       | 1.2 | 0.029809493 | 0.095576323 |
| 1384751_at   | RNA binding motif protein 8 (predicted)                                                                        | Rbm8_predicted             | 1.2 | 0.029835858 | 0.095642212 |
| 1392046_at   | Transcribed locus                                                                                              | ---                        | 1.8 | 0.029903313 | 0.095810226 |
| 1391347_at   | RAB8B, member RAS oncogene family                                                                              | Rab8b                      | 1.3 | 0.029917374 | 0.095819958 |
| 1389150_at   | Transcribed locus                                                                                              | ---                        | 1.3 | 0.029931422 | 0.095819958 |
| 1393815_at   | similar to NMDA receptor-regulated gene 2                                                                      | LOC679306 ///<br>LOC691379 | 1.4 | 0.029939987 | 0.095826602 |
| 1383842_at   | Transcribed locus, moderately similar to NP_060559.2 repeat and zinc finger domain containing 1 [Homo sapiens] | ---                        | 1.3 | 0.029949192 | 0.095837414 |
| 1393053_at   | mannosidase, alpha, class 1C, member 1 (predicted)                                                             | Man1c1_predicted           | 1.2 | 0.029969138 | 0.095882589 |

**Supplementary table 4:** Probe sets identified as down-regulated 10% FDR (p<0.03) and >1.2 fold in the L5 DRGs of SNT animals

| Probe set ID | Gene Title                                                                                                                                                                                                          | Gene Symbol              | Fold increase | p value  | FDR value   |
|--------------|---------------------------------------------------------------------------------------------------------------------------------------------------------------------------------------------------------------------|--------------------------|---------------|----------|-------------|
| 1383571_at   | hypothetical protein LOC303515                                                                                                                                                                                      | LOC303515                | 0.3           | 5.12E-09 | 1.68E-05    |
| 1382965_at   | Amphoterin induced gene and ORF 3                                                                                                                                                                                   | Amigo3                   | 0.3           | 7.53E-08 | 5.44E-05    |
| 1376225_at   | Calsenilin, presenilin binding protein, EF hand transcription factor                                                                                                                                                | Csen                     | 0.3           | 1.41E-07 | 5.82E-05    |
| 1374785_at   | similar to CD69 antigen (p60, early T-cell activation antigen) (predicted)                                                                                                                                          | RGD1565373_predicted     | 0.3           | 1.70E-07 | 6.64E-05    |
| 1377095_at   | similar to ataxin 2-binding protein 1 isoform 2 (predicted)                                                                                                                                                         | RGD1560070_predicted     | 0.2           | 7.30E-07 | 0.000174055 |
| 1393980_at   | Transcribed locus                                                                                                                                                                                                   | ---                      | 0.3           | 8.38E-07 | 0.000190087 |
| 1388543_at   | similar to HTPAP protein (predicted)                                                                                                                                                                                | RGD1306289_predicted     | 0.3           | 1.09E-06 | 0.000210194 |
| 1390815_at   | cyclin M1 (predicted)                                                                                                                                                                                               | Cnnm1_predicted          | 0.4           | 1.17E-06 | 0.000211994 |
| 1374659_at   | similar to cyclic AMP-regulated phosphoprotein, 21 isoform 2 /// similar to protein phosphatase 1, regulatory (inhibitory) subunit 1C; thymocyte ARPP; DNA segment, Chr 9, Brigham & Womens Genetics 1012 expressed | LOC363153 /// RGD1307215 | 0.3           | 1.24E-06 | 0.000215529 |
| 1376203_at   | similar to Rho guanine nucleotide exchange factor 4 isoform a                                                                                                                                                       | LOC301334                | 0.5           | 1.30E-06 | 0.000222668 |
| 1393933_at   | sortilin-related receptor, LDLR class A repeats-containing                                                                                                                                                          | Sorl1                    | 0.3           | 1.55E-06 | 0.000251478 |
| 1393404_at   | reticulon 4 receptor-like 1                                                                                                                                                                                         | Rtn4r1                   | 0.2           | 1.64E-06 | 0.000258784 |
| 1391037_at   | RGD1564491 (predicted)                                                                                                                                                                                              | RGD1564491_predicted     | 0.5           | 1.73E-06 | 0.0002692   |
| 1396265_at   | Transcribed locus                                                                                                                                                                                                   | ---                      | 0.4           | 1.79E-06 | 0.000272962 |
| 1374096_at   | Transcribed locus                                                                                                                                                                                                   | ---                      | 0.3           | 1.89E-06 | 0.000281227 |
| 1393793_at   | Transcribed locus                                                                                                                                                                                                   | ---                      | 0.5           | 2.10E-06 | 0.000292875 |
| 1388012_at   | paired related homeobox protein-like 1                                                                                                                                                                              | Prrxl1                   | 0.3           | 2.12E-06 | 0.000292875 |
| 1394609_at   | actin-binding LIM protein 2                                                                                                                                                                                         | Ablim2                   | 0.5           | 2.13E-06 | 0.000292875 |
| 1377084_at   | Transcribed locus                                                                                                                                                                                                   | ---                      | 0.4           | 2.28E-06 | 0.000299931 |
| 1374386_at   | Transcribed locus                                                                                                                                                                                                   | ---                      | 0.3           | 2.67E-06 | 0.000333128 |
| 1383582_at   | transmembrane protein 54                                                                                                                                                                                            | Tmem54                   | 0.3           | 2.85E-06 | 0.000339959 |
| 1390070_at   | ---                                                                                                                                                                                                                 | ---                      | 0.4           | 3.02E-06 | 0.000349747 |
| 1379300_at   | carbohydrate sulfotransferase 2 (predicted)                                                                                                                                                                         | Chst2_predicted          | 0.5           | 3.04E-06 | 0.000349747 |
| 1383757_at   | Transcribed locus                                                                                                                                                                                                   | ---                      | 0.2           | 3.14E-06 | 0.000358774 |
| 1374271_at   | ---                                                                                                                                                                                                                 | ---                      | 0.4           | 3.22E-06 | 0.000361299 |
| 1368749_at   | K+ voltage-gated channel, subfamily S, 1                                                                                                                                                                            | Kcns1                    | 0.2           | 3.45E-06 | 0.000375797 |
| 1392710_at   | WD repeat and FYVE domain containing 1                                                                                                                                                                              | Wdly1                    | 0.4           | 3.47E-06 | 0.000375797 |
| 1384741_at   | Phospholipase A2, group III (predicted)                                                                                                                                                                             | Pla2g3_predicted         | 0.3           | 3.58E-06 | 0.000377436 |
| 1376460_at   | similar to ataxin 2-binding protein 1 isoform 2 (predicted)                                                                                                                                                         | RGD1560070_predicted     | 0.2           | 3.60E-06 | 0.000377436 |
| 1378136_at   | ---                                                                                                                                                                                                                 | ---                      | 0.4           | 3.65E-06 | 0.000378299 |
| 1393626_at   | sortilin-related receptor, LDLR class A repeats-containing                                                                                                                                                          | Sorl1                    | 0.2           | 3.72E-06 | 0.00038152  |
| 1391200_at   | Transcribed locus                                                                                                                                                                                                   | ---                      | 0.2           | 3.73E-06 | 0.00038152  |
| 1369155_at   | contactin 4                                                                                                                                                                                                         | Cntn4                    | 0.3           | 3.79E-06 | 0.000384571 |
| 1398520_at   | Transcribed locus                                                                                                                                                                                                   | ---                      | 0.4           | 4.15E-06 | 0.000396667 |
| 1383370_at   | BMP/retinoic acid-inducible neural-specific protein 2                                                                                                                                                               | Brinp2                   | 0.5           | 4.42E-06 | 0.000411097 |
| 1380107_a_at | N-acetyltransferase 8-like (predicted)                                                                                                                                                                              | Nat8l_predicted          | 0.3           | 4.47E-06 | 0.000411097 |
| 1372690_at   | reticulon 4 receptor-like 1                                                                                                                                                                                         | Rtn4r1                   | 0.3           | 4.48E-06 | 0.000411097 |
| 1373740_at   | ---                                                                                                                                                                                                                 | ---                      | 0.4           | 4.51E-06 | 0.000411097 |
| 1374046_at   | heparan sulfate (glucosamine) 3-O-sulfotransferase 2                                                                                                                                                                | Hs3st2                   | 0.3           | 4.53E-06 | 0.000411097 |
| 1389511_s_at | ---                                                                                                                                                                                                                 | ---                      | 0.5           | 4.65E-06 | 0.000417868 |
| 1371793_at   | Acetylcholinesterase                                                                                                                                                                                                | Ache                     | 0.3           | 5.08E-06 | 0.000444873 |
| 1376311_at   | similar to netrin G1 (predicted)                                                                                                                                                                                    | RGD1563465_predicted     | 0.3           | 5.34E-06 | 0.000457557 |
| 1390652_at   | Transcribed locus                                                                                                                                                                                                   | ---                      | 0.4           | 5.40E-06 | 0.000457863 |
| 1391575_at   | ---                                                                                                                                                                                                                 | ---                      | 0.1           | 5.65E-06 | 0.000466955 |
| 1379517_at   | regulator of G-protein signaling 6                                                                                                                                                                                  | Rgs6                     | 0.5           | 6.22E-06 | 0.000486989 |
| 1385562_at   | junctionophilin 3 (predicted)                                                                                                                                                                                       | Jph3_predicted           | 0.4           | 6.65E-06 | 0.000505576 |
| 1376944_at   | Prolactin receptor                                                                                                                                                                                                  | Prlr                     | 0.2           | 6.68E-06 | 0.000505576 |
| 1393022_at   | ankyrin repeat domain 13 family, member D (predicted)                                                                                                                                                               | Ankrd13d_predicted       | 0.4           | 7.20E-06 | 0.00052578  |
| 1384771_at   | ---                                                                                                                                                                                                                 | ---                      | 0.3           | 7.26E-06 | 0.00052578  |

|              |                                                                                                               |                   |     |          |             |
|--------------|---------------------------------------------------------------------------------------------------------------|-------------------|-----|----------|-------------|
| 1378800_at   | Rho GTPase activating protein 8                                                                               | Arhgap8           | 0.3 | 7.44E-06 | 0.000536604 |
| 1382123_at   | ---                                                                                                           | ---               | 0.2 | 7.75E-06 | 0.0005521   |
| 1372884_at   | like-glycosyltransferase (predicted)                                                                          | Large_predicted   | 0.5 | 7.85E-06 | 0.000554362 |
| 1373312_at   | Transcribed locus                                                                                             | ---               | 0.5 | 8.00E-06 | 0.000556387 |
| 1390675_at   | Transcribed locus                                                                                             | ---               | 0.4 | 8.50E-06 | 0.000576069 |
| 1376486_at   | SH3-domain GRB2-like endophilin B2                                                                            | Sh3glb2           | 0.5 | 8.51E-06 | 0.000576069 |
| 1383418_at   | a disintegrin and metallopeptidase domain 11 (predicted)                                                      | Adam11_predicted  | 0.4 | 9.05E-06 | 0.000607804 |
| 1394463_at   | Transcribed locus, strongly similar to XP_507983.1 similar to PRO1933 [Pan troglodytes]                       | ---               | 0.3 | 9.64E-06 | 0.000634742 |
| 1384165_at   | Coagulation factor II (thrombin) receptor-like 2                                                              | F2r2              | 0.3 | 9.65E-06 | 0.000634742 |
| 1382915_at   | Transcribed locus                                                                                             | ---               | 0.4 | 9.90E-06 | 0.000642629 |
| 1390710_x_at | sortilin-related receptor, LDLR class A repeats-containing                                                    | Sor1              | 0.3 | 9.92E-06 | 0.000642629 |
| 1394522_at   | Transcribed locus                                                                                             | ---               | 0.4 | 1.00E-05 | 0.000644131 |
| 1385684_x_at | ---                                                                                                           | ---               | 0.3 | 1.02E-05 | 0.00064801  |
| 1367745_at   | diacylglycerol kinase zeta                                                                                    | Dgkz              | 0.4 | 1.09E-05 | 0.000675432 |
| 1368688_at   | neurotensin receptor 2                                                                                        | Ntsr2             | 0.5 | 1.14E-05 | 0.000692122 |
| 1375053_at   | Transcribed locus, strongly similar to XP_001061250.1 similar to Pbx/knotted 1 homeobox 2 [Rattus norvegicus] | ---               | 0.5 | 1.14E-05 | 0.000692192 |
| 1377767_at   | Transcribed locus                                                                                             | ---               | 0.5 | 1.14E-05 | 0.000692192 |
| 1398645_at   | Transcribed locus                                                                                             | ---               | 0.5 | 1.17E-05 | 0.000706273 |
| 1384756_at   | Solute carrier family 43, member 2 (predicted)                                                                | Slc43a2_predicted | 0.4 | 1.19E-05 | 0.000710566 |
| 1390674_at   | Transcribed locus                                                                                             | ---               | 0.5 | 1.23E-05 | 0.00072225  |
| 1369144_a_at | potassium voltage gated channel, Shal-related family, member 3                                                | Kcnd3             | 0.2 | 1.24E-05 | 0.00072225  |
| 1377457_a_at | sortilin-related receptor, LDLR class A repeats-containing                                                    | Sor1              | 0.2 | 1.28E-05 | 0.000742663 |
| 1374510_at   | Transcribed locus, moderately similar to XP_521059.2 hypothetical protein [Pan troglodytes]                   | ---               | 0.5 | 1.29E-05 | 0.000742663 |
| 1394727_at   | ---                                                                                                           | ---               | 0.2 | 1.32E-05 | 0.000749734 |
| 1382439_at   | integrin, beta 6                                                                                              | Itgb6             | 0.2 | 1.35E-05 | 0.000761055 |
| 1373693_at   | G protein-coupled receptor, family C, group 5, member C                                                       | Gprc5c            | 0.5 | 1.39E-05 | 0.000775092 |
| 1376417_at   | Transcribed locus                                                                                             | ---               | 0.3 | 1.39E-05 | 0.000775092 |
| 1379776_at   | Transcribed locus                                                                                             | ---               | 0.3 | 1.40E-05 | 0.000776806 |
| 1390362_at   | Transcribed locus                                                                                             | ---               | 0.2 | 1.41E-05 | 0.000776806 |
| 1376156_at   | hypothetical LOC316091                                                                                        | RGD1304827        | 0.5 | 1.43E-05 | 0.000782073 |
| 1377458_at   | sortilin-related receptor, LDLR class A repeats-containing                                                    | Sor1              | 0.4 | 1.45E-05 | 0.000791275 |
| 1388253_at   | Stearoyl-Coenzyme A desaturase 2                                                                              | Scd2              | 0.3 | 1.46E-05 | 0.000796096 |
| 1394786_at   | sortilin-related receptor, LDLR class A repeats-containing                                                    | Sor1              | 0.2 | 1.48E-05 | 0.000800821 |
| 1378624_at   | Transcribed locus                                                                                             | ---               | 0.3 | 1.49E-05 | 0.000804262 |
| 1385041_at   | sortilin-related VPS10 domain containing receptor 3 (predicted)                                               | Sorcs3_predicted  | 0.4 | 1.53E-05 | 0.000820233 |
| 1397016_at   | Transcribed locus                                                                                             | ---               | 0.5 | 1.56E-05 | 0.000830731 |
| 1376000_at   | Transcribed locus                                                                                             | ---               | 0.4 | 1.58E-05 | 0.000836801 |
| 1387934_at   | brevican                                                                                                      | Bcan              | 0.5 | 1.66E-05 | 0.000866701 |
| 1375667_at   | Transcribed locus                                                                                             | ---               | 0.5 | 1.67E-05 | 0.000867383 |
| 1370111_at   | potassium intermediate/small conductance calcium-activated channel, subfamily N, member 2                     | Kcnn2             | 0.3 | 1.69E-05 | 0.000867383 |
| 1381499_at   | Transcribed locus                                                                                             | ---               | 0.2 | 1.70E-05 | 0.000872971 |
| 1378197_at   | kinesin family member C2                                                                                      | KIFC2             | 0.4 | 1.76E-05 | 0.000886376 |
| 1371049_at   | dihydropyrimidinase-like 4                                                                                    | Dpysl4            | 0.4 | 1.79E-05 | 0.00089819  |
| 1374370_at   | ---                                                                                                           | ---               | 0.3 | 1.80E-05 | 0.00089819  |
| 1377693_at   | FERM and PDZ domain containing 1 (predicted)                                                                  | Frmppd1_predicted | 0.3 | 1.84E-05 | 0.000907641 |
| 1378163_at   | Transcribed locus                                                                                             | ---               | 0.3 | 1.88E-05 | 0.000918829 |
| 1368343_at   | potassium voltage-gated channel, subfamily H (eag-related), member 2                                          | Kcnn2             | 0.4 | 1.91E-05 | 0.000930303 |
| 1390477_at   | Transcribed locus                                                                                             | ---               | 0.2 | 1.93E-05 | 0.000939813 |
| 1373298_at   | Transcribed locus                                                                                             | ---               | 0.4 | 1.95E-05 | 0.000944836 |
| 1384648_at   | Transcribed locus                                                                                             | ---               | 0.3 | 1.95E-05 | 0.000944836 |

|              |                                                                                    |                         |     |          |             |
|--------------|------------------------------------------------------------------------------------|-------------------------|-----|----------|-------------|
| 1376495_at   | Transcribed locus                                                                  | ---                     | 0.5 | 2.03E-05 | 0.000968411 |
| 1368351_at   | sodium channel, voltage-gated, type 10, alpha polypeptide                          | Scn10a                  | 0.2 | 2.06E-05 | 0.000972323 |
| 1373255_at   | Transcribed locus                                                                  | ---                     | 0.6 | 2.07E-05 | 0.000972323 |
| 1374363_at   | similar to hypothetical protein FLJ30473                                           | RGD1306028              | 0.4 | 2.07E-05 | 0.000972323 |
| 1378462_at   | Transcribed locus                                                                  | ---                     | 0.5 | 2.10E-05 | 0.000982555 |
| 1383994_at   | ---                                                                                | ---                     | 0.4 | 2.14E-05 | 0.000996081 |
| 1391764_at   | Transcribed locus                                                                  | ---                     | 0.2 | 2.32E-05 | 0.001044751 |
| 1375044_at   | Transcribed locus                                                                  | ---                     | 0.6 | 2.34E-05 | 0.001044751 |
| 1371954_at   | tensin /// similar to tensin                                                       | LOC301509 /// Tns       | 0.5 | 2.35E-05 | 0.001044751 |
| 1385889_at   | Similar to hypothetical protein MGC52110 (predicted)                               | RGD1565095_predicted    | 0.3 | 2.39E-05 | 0.001049726 |
| 1392746_x_at | La ribonucleoprotein domain family, member 1 (predicted)                           | Larp1_predicted         | 0.5 | 2.40E-05 | 0.001049726 |
| 1387923_at   | zinc finger protein 179                                                            | Zfp179                  | 0.2 | 2.42E-05 | 0.001053164 |
| 1389522_at   | pleckstrin homology domain containing, family A member 6 (predicted)               | Plekha6_predicted       | 0.6 | 2.42E-05 | 0.001053164 |
| 1374787_at   | Transcribed locus                                                                  | ---                     | 0.2 | 2.47E-05 | 0.001064804 |
| 1368839_at   | Wolfram syndrome 1 homolog (human)                                                 | Wfs1                    | 0.5 | 2.53E-05 | 0.001089032 |
| 1391919_at   | similar to transcription elongation regulator 1-like (predicted)                   | RGD1562437_predicted    | 0.4 | 2.56E-05 | 0.001093364 |
| 1383580_at   | ---                                                                                | ---                     | 0.3 | 2.58E-05 | 0.001094871 |
| 1379396_at   | engulfment and cell motility 1, ced-12 homolog (C. elegans) (predicted)            | Elmo1_predicted         | 0.5 | 2.64E-05 | 0.001117143 |
| 1390196_at   | Synapsin I                                                                         | Syn1                    | 0.3 | 2.67E-05 | 0.001119838 |
| 1373322_at   | Transcribed locus                                                                  | ---                     | 0.5 | 2.70E-05 | 0.001128523 |
| 1373751_at   | Transcribed locus                                                                  | ---                     | 0.5 | 2.70E-05 | 0.001128523 |
| 1373656_at   | Transcribed locus                                                                  | ---                     | 0.5 | 2.73E-05 | 0.001133504 |
| 1384996_at   | Transcribed locus                                                                  | ---                     | 0.5 | 2.74E-05 | 0.001133504 |
| 1373331_at   | Similar to Leucine rich repeat and sterile alpha motif containing 1 (predicted)    | RGD1564403_predicted    | 0.5 | 2.76E-05 | 0.001133504 |
| 1394402_at   | ---                                                                                | ---                     | 0.3 | 2.87E-05 | 0.001171025 |
| 1393971_at   | Transcribed locus                                                                  | ---                     | 0.4 | 2.89E-05 | 0.001175409 |
| 1368789_at   | acid phosphatase, prostate                                                         | Acpp                    | 0.4 | 2.91E-05 | 0.001176405 |
| 1369149_at   | LIM motif-containing protein kinase 1                                              | Limk1                   | 0.6 | 2.92E-05 | 0.001176405 |
| 1376764_at   | CDNA clone IMAGE:7319904                                                           | ---                     | 0.6 | 2.93E-05 | 0.001176405 |
| 1390227_at   | hypothetical protein LOC678810 /// hypothetical protein LOC685448                  | LOC678810 /// LOC685448 | 0.3 | 2.93E-05 | 0.001176718 |
| 1374269_at   | Transcribed locus                                                                  | ---                     | 0.4 | 3.00E-05 | 0.001193299 |
| 1390751_at   | ---                                                                                | ---                     | 0.4 | 3.03E-05 | 0.001199774 |
| 1374035_at   | Rad and gem related GTP binding protein 2                                          | Rem2                    | 0.2 | 3.04E-05 | 0.001199774 |
| 1387554_at   | UDP-N-acetyl-alpha-D-galactosamine:polypeptide N-acetylgalactosaminyltransferase 5 | Galnt5                  | 0.3 | 3.10E-05 | 0.001212796 |
| 1369159_at   | androgen receptor                                                                  | Ar                      | 0.4 | 3.13E-05 | 0.001224223 |
| 1373949_at   | ATPase type 13A2 (predicted)                                                       | Atp13a2_predicted       | 0.4 | 3.19E-05 | 0.001236544 |
| 1398298_at   | 5-hydroxytryptamine (serotonin) receptor 1D                                        | Htr1d                   | 0.3 | 3.22E-05 | 0.00124752  |
| 1393004_at   | similar to mKIAA1045 protein (predicted)                                           | RGD1559864_predicted    | 0.3 | 3.29E-05 | 0.001254225 |
| 1370375_at   | glutaminase 2 (liver, mitochondrial)                                               | Gls2                    | 0.5 | 3.47E-05 | 0.001302935 |
| 1393262_at   | Transcribed locus                                                                  | ---                     | 0.3 | 3.54E-05 | 0.001318357 |
| 1373987_at   | Kv channel-interacting protein 2                                                   | Kcnp2                   | 0.3 | 3.60E-05 | 0.001329385 |
| 1376111_at   | ---                                                                                | ---                     | 0.5 | 3.72E-05 | 0.00135381  |
| 1391902_at   | Phosphoglycerate mutase 2                                                          | Pgam2                   | 0.6 | 3.76E-05 | 0.001364509 |
| 1380865_at   | Transcribed locus                                                                  | ---                     | 0.4 | 3.82E-05 | 0.00137356  |
| 1383220_at   | Kv channel interacting protein 4                                                   | Kcnp4                   | 0.2 | 3.83E-05 | 0.001374201 |
| 1388735_at   | Transcribed locus                                                                  | ---                     | 0.4 | 3.93E-05 | 0.001397654 |
| 1390334_at   | similar to hypothetical protein DKFZp434I2117 (predicted)                          | RGD1308215_predicted    | 0.4 | 3.96E-05 | 0.001404139 |
| 1394575_at   | guanine nucleotide binding protein, alpha stimulating, olfactory type              | Gnal                    | 0.5 | 4.31E-05 | 0.001504327 |
| 1371052_at   | noggin                                                                             | Nog                     | 0.3 | 4.37E-05 | 0.001516999 |
| 1390123_at   | transmembrane protein 45b                                                          | Tmem45b                 | 0.3 | 4.42E-05 | 0.001526634 |
| 1373985_at   | Similar to KIAA1183 protein (predicted)                                            | RGD1560435_predicted    | 0.4 | 4.48E-05 | 0.001543115 |
| 1373125_at   | kinesin light chain 2 (predicted)                                                  | Klc2_predicted          | 0.4 | 4.56E-05 | 0.001557006 |
| 1395014_at   | Transcribed locus                                                                  | ---                     | 0.3 | 4.56E-05 | 0.001557006 |

|              |                                                                                                           |                            |     |          |             |
|--------------|-----------------------------------------------------------------------------------------------------------|----------------------------|-----|----------|-------------|
| 1382824_at   | RUN and TBC1 domain containing 2 (predicted)                                                              | Rutbc2_predicted           | 0.5 | 4.61E-05 | 0.001567855 |
| 1368174_at   | EGL nine homolog 3 (C. elegans)                                                                           | Egln3                      | 0.3 | 4.64E-05 | 0.001573247 |
| 1387881_at   | potassium channel, subfamily V, member 1                                                                  | Kcnv1                      | 0.2 | 4.65E-05 | 0.001575176 |
| 1392206_at   | similar to solute carrier family 35, member F3 (predicted)                                                | RGD1561109_predicted       | 0.4 | 4.69E-05 | 0.001582928 |
| 1395289_at   | similar to Vacuolar protein sorting 26 homolog (VPS26 protein homolog)                                    | LOC300472                  | 0.6 | 4.71E-05 | 0.0015857   |
| 1386333_at   | Transcribed locus                                                                                         | ---                        | 0.4 | 4.81E-05 | 0.001600387 |
| 1398182_at   | Transcribed locus                                                                                         | ---                        | 0.4 | 4.81E-05 | 0.001600387 |
| 1384080_at   | Transcribed locus                                                                                         | ---                        | 0.4 | 4.83E-05 | 0.001602838 |
| 1390358_at   | calcium channel, voltage-dependent, alpha 2/delta 3 subunit                                               | Cacna2d3                   | 0.5 | 4.85E-05 | 0.001606539 |
| 1384865_at   | Similar to leucine zipper, down-regulated in cancer 1 (predicted)                                         | RGD1565644_predicted       | 0.6 | 4.92E-05 | 0.001624191 |
| 1370306_at   | peroxisomal biogenesis factor 14                                                                          | Pex14                      | 0.4 | 4.99E-05 | 0.001646062 |
| 1377163_at   | inhibin beta-B                                                                                            | Inhbb                      | 0.3 | 5.05E-05 | 0.001662145 |
| 1369165_at   | transient receptor potential cation channel, subfamily C, member 3                                        | Trpc3                      | 0.5 | 5.15E-05 | 0.001683622 |
| 1382147_at   | similar to CG14446-PA                                                                                     | LOC363915                  | 0.3 | 5.25E-05 | 0.001707117 |
| 1384169_a_at | Vav2 oncogene (predicted)                                                                                 | Vav2_predicted             | 0.5 | 5.25E-05 | 0.001707117 |
| 1391728_at   | similar to mab-21-like 2                                                                                  | LOC680102 ///<br>LOC683881 | 0.5 | 5.51E-05 | 0.001745623 |
| 1375247_at   | ---                                                                                                       | ---                        | 0.6 | 5.52E-05 | 0.001745623 |
| 1382374_at   | ---                                                                                                       | ---                        | 0.4 | 5.54E-05 | 0.001745623 |
| 1391563_at   | similar to melanoma associated antigen (mutated) 1-like 1 (predicted)                                     | RGD1565148_predicted       | 0.3 | 5.54E-05 | 0.001745623 |
| 1367965_at   | solute carrier family 9, member 1                                                                         | Slc9a1                     | 0.5 | 5.62E-05 | 0.001759986 |
| 1382842_at   | Cyclin H                                                                                                  | Ccnh                       | 0.5 | 5.63E-05 | 0.001759986 |
| 1383931_at   | Protein tyrosine phosphatase, receptor type, K, extracellular region                                      | Ptpkr                      | 0.4 | 5.68E-05 | 0.001767498 |
| 1397497_at   | Transcribed locus                                                                                         | ---                        | 0.4 | 5.68E-05 | 0.001767498 |
| 1376041_at   | epsin 3                                                                                                   | Epn3                       | 0.4 | 5.71E-05 | 0.001769703 |
| 1369000_at   | neurotrophic tyrosine kinase, receptor, type 1                                                            | Ntrk1                      | 0.3 | 5.73E-05 | 0.001769703 |
| 1393074_at   | Similar to hypothetical protein FLJ38984 (predicted)                                                      | RGD1563072_predicted       | 0.6 | 5.78E-05 | 0.001781154 |
| 1382821_at   | protein tyrosine phosphatase, receptor type, f polypeptide (PTPRF), interacting protein (liprin), alpha 3 | Ppfia3                     | 0.5 | 5.88E-05 | 0.001801909 |
| 1373691_at   | Transcribed locus                                                                                         | ---                        | 0.6 | 5.94E-05 | 0.001811848 |
| 1380459_at   | BTB (POZ) domain containing 14A                                                                           | Btbd14a                    | 0.5 | 5.95E-05 | 0.001811848 |
| 1369722_a_at | xylosyltransferase II                                                                                     | Xylt2                      | 0.6 | 5.98E-05 | 0.00181593  |
| 1369783_a_at | neuregulin 1                                                                                              | Nrg1                       | 0.4 | 6.14E-05 | 0.001855729 |
| 1398099_at   | ---                                                                                                       | ---                        | 0.5 | 6.15E-05 | 0.001855729 |
| 1368425_at   | CASK interacting protein 1                                                                                | Caskin1                    | 0.4 | 6.20E-05 | 0.001863489 |
| 1394446_at   | Transcribed locus                                                                                         | ---                        | 0.5 | 6.31E-05 | 0.001889412 |
| 1395461_at   | Transcribed locus                                                                                         | ---                        | 0.6 | 6.33E-05 | 0.001893019 |
| 1386439_at   | ---                                                                                                       | ---                        | 0.6 | 6.47E-05 | 0.001921205 |
| 1367957_at   | regulator of G-protein signalling 3                                                                       | Rgs3                       | 0.5 | 6.54E-05 | 0.001938239 |
| 1377942_at   | Transcribed locus                                                                                         | ---                        | 0.3 | 6.55E-05 | 0.001938864 |
| 1373398_at   | tripartite motif protein 37 (predicted)                                                                   | Trim37_predicted           | 0.5 | 6.59E-05 | 0.00194332  |
| 1376060_at   | Transcribed locus                                                                                         | ---                        | 0.6 | 6.59E-05 | 0.00194332  |
| 1369158_at   | calcium-sensing receptor                                                                                  | Casr                       | 0.3 | 6.67E-05 | 0.001962866 |
| 1383413_at   | Gup1, glycerol uptake/transporter homolog (yeast) (predicted)                                             | Gup1_predicted             | 0.3 | 6.88E-05 | 0.002000394 |
| 1378198_at   | oligophrenin 1 (predicted)                                                                                | Ophn1_predicted            | 0.6 | 6.97E-05 | 0.002010193 |
| 1388173_at   | potassium voltage-gated channel, Shal-related family, member 1                                            | Kcnd1                      | 0.4 | 7.02E-05 | 0.002010193 |
| 1393349_x_at | Vav2 oncogene (predicted)                                                                                 | Vav2_predicted             | 0.5 | 7.04E-05 | 0.002014971 |
| 1394545_at   | spire homolog 2 (Drosophila) (predicted)                                                                  | Spire2_predicted           | 0.4 | 7.16E-05 | 0.002038885 |
| 1381222_at   | ---                                                                                                       | ---                        | 0.5 | 7.31E-05 | 0.002069202 |
| 1398623_at   | cholinergic receptor, nicotinic, beta polypeptide 4                                                       | Chrnb4                     | 0.3 | 7.37E-05 | 0.002078119 |
| 1370517_at   | neuronal pentraxin 1                                                                                      | Nptx1                      | 0.2 | 7.57E-05 | 0.002123916 |
| 1383499_at   | ---                                                                                                       | ---                        | 0.2 | 7.71E-05 | 0.002157244 |
| 1392927_at   | progesterone and adipoQ receptor family member IV                                                         | Paqr4                      | 0.4 | 7.80E-05 | 0.002177047 |
| 1395255_at   | Transcribed locus                                                                                         | ---                        | 0.4 | 7.91E-05 | 0.00220097  |

|              |                                                                                                                                                                                                                                           |                      |     |             |             |
|--------------|-------------------------------------------------------------------------------------------------------------------------------------------------------------------------------------------------------------------------------------------|----------------------|-----|-------------|-------------|
| 1371522_at   | similar to mKIAA0945 protein (predicted)                                                                                                                                                                                                  | RGD1563127_predicted | 0.6 | 7.99E-05    | 0.002215207 |
| 1370595_a_at | Kv channel interacting protein 4                                                                                                                                                                                                          | Kcnp4                | 0.5 | 8.01E-05    | 0.002215606 |
| 1370624_at   | coagulation factor II (thrombin) receptor-like 2                                                                                                                                                                                          | F2r12                | 0.3 | 8.18E-05    | 0.002251458 |
| 1368987_at   | ---                                                                                                                                                                                                                                       | ---                  | 0.2 | 8.23E-05    | 0.002260751 |
| 1376172_at   | ATP-binding cassette, sub-family G (WHITE), member 4                                                                                                                                                                                      | Abcg4                | 0.6 | 8.30E-05    | 0.002267697 |
| 1374168_at   | Transcribed locus                                                                                                                                                                                                                         | ---                  | 0.4 | 8.31E-05    | 0.002267697 |
| 1382201_at   | unc-5 homolog C (C. elegans)                                                                                                                                                                                                              | Unc5c                | 0.5 | 8.31E-05    | 0.002267697 |
| 1383566_at   | Transcribed locus                                                                                                                                                                                                                         | ---                  | 0.2 | 8.40E-05    | 0.002279288 |
| 1372881_at   | Transcribed locus                                                                                                                                                                                                                         | ---                  | 0.5 | 8.46E-05    | 0.002293258 |
| 1370666_at   | dynamamin 3                                                                                                                                                                                                                               | Dnm3                 | 0.3 | 8.56E-05    | 0.002298812 |
| 1371034_at   | one cut domain, family member 1                                                                                                                                                                                                           | Onecut1              | 0.4 | 8.56E-05    | 0.002298812 |
| 1373435_at   | fragile X mental retardation gene 2, autosomal homolog (predicted)                                                                                                                                                                        | Fxr2h_predicted      | 0.5 | 8.70E-05    | 0.002315223 |
| 1388423_at   | hypothetical protein MGC:15854                                                                                                                                                                                                            | RGD1302996           | 0.4 | 8.88E-05    | 0.002347992 |
| 1379336_at   | Transcribed locus                                                                                                                                                                                                                         | ---                  | 0.5 | 8.99E-05    | 0.002362838 |
| 1396276_at   | Transcribed locus                                                                                                                                                                                                                         | ---                  | 0.3 | 9.02E-05    | 0.002362838 |
| 1370962_at   | castration induced prostatic apoptosis-related protein 1                                                                                                                                                                                  | Cipar1               | 0.4 | 9.03E-05    | 0.002362838 |
| 1383995_at   | ---                                                                                                                                                                                                                                       | ---                  | 0.5 | 9.03E-05    | 0.002362838 |
| 1397459_at   | Transcribed locus                                                                                                                                                                                                                         | ---                  | 0.5 | 9.05E-05    | 0.002362838 |
| 1395536_at   | Transcribed locus                                                                                                                                                                                                                         | ---                  | 0.4 | 9.17E-05    | 0.002377389 |
| 1384286_at   | Transcribed locus                                                                                                                                                                                                                         | ---                  | 0.5 | 9.18E-05    | 0.002377389 |
| 1370259_a_at | parathyroid hormone receptor 1                                                                                                                                                                                                            | Pthr1                | 0.3 | 9.24E-05    | 0.002386892 |
| 1375431_at   | similar to CG31122-PA (predicted)                                                                                                                                                                                                         | RGD1306941_predicted | 0.4 | 9.37E-05    | 0.002399451 |
| 1373110_at   | Transcribed locus                                                                                                                                                                                                                         | ---                  | 0.4 | 9.39E-05    | 0.002400957 |
| 1385912_at   | dual specificity phosphatase-like 15 (predicted)                                                                                                                                                                                          | Dusp15_predicted     | 0.3 | 9.66E-05    | 0.002451996 |
| 1382569_at   | progesterin and adipoQ receptor family member IX (predicted)                                                                                                                                                                              | Paqr9_predicted      | 0.4 | 9.76E-05    | 0.002473373 |
| 1368407_at   | heparanase                                                                                                                                                                                                                                | Hpse                 | 0.3 | 9.81E-05    | 0.002477476 |
| 1381369_at   | leucine-rich repeat LGI family, member 3 (predicted)                                                                                                                                                                                      | Lgi3_predicted       | 0.3 | 9.86E-05    | 0.002486336 |
| 1396459_at   | Insulin related protein 2 (islet 2)                                                                                                                                                                                                       | Isl2                 | 0.3 | 9.87E-05    | 0.002486479 |
| 1370125_at   | hyaluronan and proteoglycan link protein 1                                                                                                                                                                                                | Hapln1               | 0.4 | 9.92E-05    | 0.002488416 |
| 1372226_at   | Transcribed locus, strongly similar to XP_001076245.1 similar to SLIT-ROBO Rho GTPase-activating protein 3 (srGAP3) (srGAP2) (WAVE-associated Rac GTPase-activating protein) (WRP) (Rho-GTPase-activating protein 14) [Rattus norvegicus] | ---                  | 0.6 | 9.94E-05    | 0.002488416 |
| 1373414_at   | similar to Brain specific membrane-anchored protein precursor                                                                                                                                                                             | RGD1305557           | 0.5 | 9.97E-05    | 0.002489015 |
| 1393000_at   | ---                                                                                                                                                                                                                                       | ---                  | 0.5 | 9.97E-05    | 0.002489015 |
| 1398649_at   | SLIT and NTRK-like family, member 3 (predicted)                                                                                                                                                                                           | Slitrk3_predicted    | 0.3 | 0.000100959 | 0.002508411 |
| 1373559_at   | ---                                                                                                                                                                                                                                       | ---                  | 0.3 | 0.000101176 | 0.002510008 |
| 1393299_at   | dipeptidylpeptidase 10                                                                                                                                                                                                                    | Dpp10                | 0.2 | 0.000101794 | 0.002519242 |
| 1389772_at   | Transcribed locus                                                                                                                                                                                                                         | ---                  | 0.6 | 0.000102161 | 0.002523031 |
| 1368124_at   | dual specificity phosphatase 5                                                                                                                                                                                                            | Dusp5                | 0.4 | 0.000103255 | 0.002546229 |
| 1393712_at   | Transcribed locus                                                                                                                                                                                                                         | ---                  | 0.4 | 0.000104773 | 0.002575952 |
| 1368696_at   | FXD domain-containing ion transport regulator 7                                                                                                                                                                                           | Fxyd7                | 0.3 | 0.000105353 | 0.002585426 |
| 1376282_at   | Transcribed locus                                                                                                                                                                                                                         | ---                  | 0.6 | 0.000105473 | 0.002585426 |
| 1378039_at   | Transcribed locus                                                                                                                                                                                                                         | ---                  | 0.5 | 0.000105631 | 0.002585444 |
| 1380688_at   | UDP-N-acetyl-alpha-D-galactosamine:polypeptide N-acetylgalactosaminyltransferase-like 4 (predicted)                                                                                                                                       | Galnt14_predicted    | 0.3 | 0.000105858 | 0.002587159 |
| 1374164_at   | Transcribed locus                                                                                                                                                                                                                         | ---                  | 0.5 | 0.000106218 | 0.002592106 |
| 1393321_at   | kelch domain containing 1 (predicted)                                                                                                                                                                                                     | Klhd1c1_predicted    | 0.5 | 0.000108954 | 0.002631524 |
| 1378252_at   | chondrolectin (predicted)                                                                                                                                                                                                                 | Chodl_predicted      | 0.3 | 0.000109469 | 0.002633336 |
| 1387208_at   | neuroglobin                                                                                                                                                                                                                               | Ngb                  | 0.5 | 0.000110227 | 0.00263908  |
| 1391331_at   | Transcribed locus                                                                                                                                                                                                                         | ---                  | 0.4 | 0.000110253 | 0.00263908  |
| 1379693_at   | roundabout homolog 2 (Drosophila)                                                                                                                                                                                                         | Robo2                | 0.4 | 0.000110521 | 0.00263908  |
| 1374310_at   | protein phosphatase 1J                                                                                                                                                                                                                    | Ppm1j                | 0.4 | 0.000111972 | 0.002656412 |
| 1398233_at   | Transcribed locus                                                                                                                                                                                                                         | ---                  | 0.5 | 0.000112098 | 0.002656412 |

|              |                                                                                      |                                 |     |             |             |
|--------------|--------------------------------------------------------------------------------------|---------------------------------|-----|-------------|-------------|
| 1393291_at   | similar to CG4502-PA, isoform A                                                      | LOC679949 ///<br>LOC682677      | 0.4 | 0.000112416 | 0.002656412 |
| 1370648_a_at | SH3 domain binding protein CR16                                                      | Cr16                            | 0.5 | 0.000112657 | 0.002656412 |
| 1368759_at   | calcium channel, voltage-dependent, gamma subunit 2                                  | Cacng2                          | 0.2 | 0.000114226 | 0.002682757 |
| 1372443_at   | low density lipoprotein receptor-related protein 11 (predicted)                      | Lrp11_predicted                 | 0.6 | 0.0001145   | 0.002682757 |
| 1378345_at   | Transcribed locus                                                                    | ---                             | 0.5 | 0.000116161 | 0.002713934 |
| 1372782_a_at | similar to adenosine monophosphate deaminase 2 (isoform L)                           | LOC362015                       | 0.7 | 0.000116521 | 0.002718281 |
| 1387309_a_at | glutamate receptor, ionotropic, kainate 1                                            | Grik1                           | 0.3 | 0.000116842 | 0.002718281 |
| 1372960_a_at | xylosyltransferase II                                                                | Xylt2                           | 0.6 | 0.000117668 | 0.002733618 |
| 1382301_at   | Transcribed locus                                                                    | ---                             | 0.5 | 0.000117921 | 0.002735019 |
| 1390146_at   | ---                                                                                  | ---                             | 0.4 | 0.000118227 | 0.002735019 |
| 1383526_at   | Transcribed locus                                                                    | ---                             | 0.6 | 0.000118839 | 0.002738172 |
| 1390026_at   | Bcl2-associated athanogene 3                                                         | Bag3                            | 0.4 | 0.000118863 | 0.002738172 |
| 1371212_at   | neuregulin 1                                                                         | Nrg1                            | 0.4 | 0.000120748 | 0.00277383  |
| 1378652_at   | Transcribed locus                                                                    | ---                             | 0.4 | 0.000121347 | 0.002783702 |
| 1369345_at   | inositol polyphosphate-4-phosphatase, type II                                        | Inpp4b                          | 0.5 | 0.000122214 | 0.00279689  |
| 1370964_at   | argininosuccinate synthetase                                                         | Ass                             | 0.3 | 0.000123756 | 0.002824315 |
| 1374743_at   | similar to channel-interacting PDZ domain protein isoform 1 (predicted)              | RGD1565362_pre<br>dicted        | 0.3 | 0.000123804 | 0.002824315 |
| 1368751_at   | potassium voltage-gated channel, delayed-rectifier, subfamily S, member 3            | Kcns3                           | 0.3 | 0.000124381 | 0.002829627 |
| 1387556_at   | contactin 6                                                                          | Cntn6                           | 0.4 | 0.000126139 | 0.002853825 |
| 1374954_at   | histone deacetylase 11 (predicted)                                                   | Hdac11_predicted                | 0.5 | 0.000126316 | 0.00285392  |
| 1385280_at   | Nucleotide binding protein 1                                                         | Nubp1                           | 0.6 | 0.000126498 | 0.002854106 |
| 1376661_at   | similar to CG11206-PA                                                                | LOC313672                       | 0.4 | 0.000127095 | 0.002863646 |
| 1397840_at   | Transcribed locus                                                                    | ---                             | 0.4 | 0.000128502 | 0.002885085 |
| 1368103_at   | ATP-binding cassette, sub-family G (WHITE), member 1                                 | Abcg1                           | 0.6 | 0.000128536 | 0.002885085 |
| 1380330_at   | Transcribed locus                                                                    | ---                             | 0.4 | 0.000128573 | 0.002885085 |
| 1378288_at   | similar to RIKEN cDNA D630035O19 (predicted)                                         | RGD1311100_pre<br>dicted        | 0.4 | 0.000128968 | 0.002887736 |
| 1394491_at   | ---                                                                                  | ---                             | 0.4 | 0.0001291   | 0.002887736 |
| 1375484_at   | Transcribed locus                                                                    | ---                             | 0.6 | 0.000129839 | 0.002897684 |
| 1389573_at   | ChaC, cation transport regulator-like 1 (E. coli) (predicted)                        | Chac1_predicted                 | 0.5 | 0.000131098 | 0.002917866 |
| 1385640_at   | proprotein convertase subtilisin/kexin type 9                                        | Pcsk9                           | 0.5 | 0.000131852 | 0.002930672 |
| 1368561_at   | ATP-binding cassette, sub-family D (ALD), member 2                                   | Abcd2                           | 0.4 | 0.00013228  | 0.00293623  |
| 1395223_at   | similar to hypothetical protein MGC35097                                             | MGC94736                        | 0.4 | 0.000133919 | 0.002956634 |
| 1379092_at   | Transcribed locus                                                                    | ---                             | 0.5 | 0.000135885 | 0.002980043 |
| 1381001_at   | Kelch repeat and BTB (POZ) domain containing 3 (predicted)                           | Kbtbd3_predicted                | 0.5 | 0.000137448 | 0.003000657 |
| 1397177_at   | Transcribed locus                                                                    | ---                             | 0.4 | 0.000138337 | 0.003009751 |
| 1380570_at   | ---                                                                                  | ---                             | 0.5 | 0.00013973  | 0.003032023 |
| 1375066_at   | similar to RIKEN cDNA 6330512M04 gene (predicted)                                    | RGD1563319_pre<br>dicted        | 0.3 | 0.000141051 | 0.00304339  |
| 1390865_at   | similar to Ca <sup>2+</sup> -dependent activator for secretion protein 2 (predicted) | RGD1559440_pre<br>dicted        | 0.4 | 0.000141636 | 0.00304339  |
| 1368879_a_at | guanine nucleotide binding protein, alpha o                                          | Gnao                            | 0.4 | 0.00014187  | 0.00304339  |
| 1392880_at   | ---                                                                                  | ---                             | 0.3 | 0.000143168 | 0.003062185 |
| 1386119_at   | Hypothetical protein LOC689147                                                       | LOC689147                       | 0.3 | 0.00014586  | 0.00310289  |
| 1384272_at   | Zinc finger protein 365                                                              | Zfp365                          | 0.5 | 0.000146163 | 0.00310289  |
| 1384923_at   | Transcribed locus                                                                    | ---                             | 0.4 | 0.000146203 | 0.00310289  |
| 1394412_at   | transmembrane protein 16C (predicted)                                                | Tmem16c_predic<br>ted           | 0.3 | 0.000146945 | 0.003110839 |
| 1369369_at   | potassium voltage gated channel, Shab-related subfamily, member 2                    | Kcnb2                           | 0.4 | 0.000147523 | 0.003110839 |
| 1373701_at   | Transcribed locus                                                                    | ---                             | 0.6 | 0.000149212 | 0.003138407 |
| 1367949_at   | proenkephalin 1                                                                      | Penk1                           | 0.4 | 0.000149843 | 0.003142146 |
| 1383870_at   | similar to homeotic protein Hox 2.2 - mouse (predicted)                              | RGD1562142_pre<br>dicted        | 0.4 | 0.000149899 | 0.003142146 |
| 1385731_at   | Transcribed locus                                                                    | ---                             | 0.3 | 0.000151579 | 0.003159775 |
| 1379505_at   | limb expression 1 homolog (chicken) (predicted) /// similar to limb expression 1     | Lix1_predicted ///<br>LOC500376 | 0.4 | 0.000152925 | 0.003179921 |
| 1385092_at   | Eph receptor A6 (predicted)                                                          | Epha6_predicted                 | 0.5 | 0.000154036 | 0.003194941 |



|              |                                                                                                                                                                                                              |                         |     |             |             |
|--------------|--------------------------------------------------------------------------------------------------------------------------------------------------------------------------------------------------------------|-------------------------|-----|-------------|-------------|
| 1381080_at   | Transcribed locus                                                                                                                                                                                            | ---                     | 0.3 | 0.000155275 | 0.003216568 |
| 1377655_at   | ---                                                                                                                                                                                                          | ---                     | 0.5 | 0.000155565 | 0.003217024 |
| 1374808_at   | similar to hypothetical protein FLJ21156 (predicted)                                                                                                                                                         | RGD1309823_predicted    | 0.6 | 0.000155688 | 0.003217024 |
| 1377683_at   | similar to hypothetical protein FLJ13045 (predicted)                                                                                                                                                         | RGD1307615_predicted    | 0.5 | 0.00015683  | 0.003232509 |
| 1371889_at   | solute carrier family 22 (organic cation transporter), member 17                                                                                                                                             | Slc22a17                | 0.5 | 0.000158135 | 0.003255315 |
| 1372017_at   | diablo homolog (Drosophila)                                                                                                                                                                                  | Diablo                  | 0.5 | 0.000159323 | 0.003272732 |
| 1373502_at   | dymeclin (predicted)                                                                                                                                                                                         | Dym_predicted           | 0.5 | 0.000159559 | 0.003272732 |
| 1384229_at   | guanine nucleotide binding protein, alpha stimulating, olfactory type                                                                                                                                        | Gnal                    | 0.5 | 0.000159777 | 0.003272732 |
| 1375947_at   | Transcribed locus                                                                                                                                                                                            | ---                     | 0.6 | 0.000161207 | 0.003293839 |
| 1367725_at   | serine/threonine-protein kinase pim-3                                                                                                                                                                        | Pim3                    | 0.5 | 0.000165774 | 0.003374564 |
| 1385321_at   | similar to heterogeneous nuclear ribonucleoprotein methyltransferase-like 4 /// similar to Protein arginine N-methyltransferase 4 (Heterogeneous nuclear ribonucleoprotein methyltransferase-like protein 4) | LOC683275 /// LOC688502 | 0.3 | 0.000167706 | 0.003398625 |
| 1383367_at   | sterile alpha motif domain containing 14                                                                                                                                                                     | Samd14                  | 0.5 | 0.000168485 | 0.003406638 |
| 1372179_at   | hippocalcin-like 1                                                                                                                                                                                           | Hpcal1                  | 0.6 | 0.000168795 | 0.003406638 |
| 1376104_at   | similar to KIAA0802 protein (predicted)                                                                                                                                                                      | RGD1308319_predicted    | 0.4 | 0.000169731 | 0.003421237 |
| 1394916_at   | Transcribed locus                                                                                                                                                                                            | ---                     | 0.4 | 0.00017033  | 0.003429124 |
| 1377828_at   | transmembrane protein 16C (predicted)                                                                                                                                                                        | Tmem16c_predicted       | 0.3 | 0.000172934 | 0.003468805 |
| 1376657_at   | immunoglobulin superfamily, member 4A                                                                                                                                                                        | Igsf4a                  | 0.6 | 0.000173308 | 0.003469941 |
| 1370124_at   | metallothionein 3                                                                                                                                                                                            | Mt3                     | 0.4 | 0.000174109 | 0.003475417 |
| 1369677_at   | ---                                                                                                                                                                                                          | ---                     | 0.4 | 0.000175277 | 0.003490256 |
| 1393833_at   | angel homolog 1 (Drosophila) (predicted)                                                                                                                                                                     | Angel1_predicted        | 0.6 | 0.000175655 | 0.003493561 |
| 1393410_at   | Transcribed locus                                                                                                                                                                                            | ---                     | 0.4 | 0.000178328 | 0.003538157 |
| 1376800_at   | Transcribed locus                                                                                                                                                                                            | ---                     | 0.5 | 0.000178728 | 0.00354183  |
| 1389242_at   | ---                                                                                                                                                                                                          | ---                     | 0.5 | 0.000180316 | 0.003553526 |
| 1389086_at   | similar to RIKEN cDNA E430021N18 (predicted)                                                                                                                                                                 | RGD1564043_predicted    | 0.3 | 0.000180615 | 0.003553526 |
| 1368949_at   | early B-cell factor 1                                                                                                                                                                                        | Ebf1                    | 0.4 | 0.000182072 | 0.003571466 |
| 1372602_at   | similar to genethonin 1                                                                                                                                                                                      | RGD1311800              | 0.3 | 0.000182178 | 0.003571466 |
| 1387387_at   | hippocalcin                                                                                                                                                                                                  | Hpca                    | 0.6 | 0.000184642 | 0.003599975 |
| 1376130_a_at | dystrobrevin, beta                                                                                                                                                                                           | Dtnb                    | 0.5 | 0.000185466 | 0.003599975 |
| 1374262_at   | Transcribed locus                                                                                                                                                                                            | ---                     | 0.5 | 0.000185553 | 0.003599975 |
| 1371045_at   | amiloride-sensitive cation channel 2, neuronal                                                                                                                                                               | Accn2                   | 0.4 | 0.000185554 | 0.003599975 |
| 1375026_at   | similar to calmodulin-like 4                                                                                                                                                                                 | LOC686783 /// LOC691455 | 0.3 | 0.000186373 | 0.003604234 |
| 1370572_at   | G protein-coupled receptor 149                                                                                                                                                                               | Gpr149                  | 0.4 | 0.000187136 | 0.003604234 |
| 1378421_at   | Transcribed locus, strongly similar to XP_904500.1 hypothetical protein LOC69784 [Mus musculus]                                                                                                              | ---                     | 0.3 | 0.000187731 | 0.003611462 |
| 1397753_at   | phosphatidylinositol glycan, class Q                                                                                                                                                                         | Pigq                    | 0.6 | 0.00018822  | 0.003616636 |
| 1397899_at   | ---                                                                                                                                                                                                          | ---                     | 0.6 | 0.000188869 | 0.003624868 |
| 1384655_at   | kin of IRRE like 3 (Drosophila) (predicted)                                                                                                                                                                  | Kirrel3_predicted       | 0.3 | 0.000190647 | 0.003637774 |
| 1392563_at   | Rho GTPase activating protein 8 (predicted)                                                                                                                                                                  | Arhgap8_predicted       | 0.5 | 0.000192333 | 0.003662697 |
| 1384132_at   | immunoglobulin superfamily, member 4A                                                                                                                                                                        | Igsf4a                  | 0.3 | 0.000192745 | 0.003662697 |
| 1392920_at   | Elongation factor RNA polymerase II-like 3                                                                                                                                                                   | Eif3                    | 0.4 | 0.000192844 | 0.003662697 |
| 1380828_at   | gamma-aminobutyric acid A receptor, alpha 1                                                                                                                                                                  | Gabra1                  | 0.3 | 0.000193592 | 0.003672675 |
| 1384942_at   | leucine rich repeat and fibronectin type III domain containing 5 (predicted)                                                                                                                                 | Lrn5_predicted          | 0.5 | 0.000194273 | 0.003681347 |
| 1391036_at   | IQ motif and Sec7 domain 3                                                                                                                                                                                   | Iqsec3                  | 0.6 | 0.000194955 | 0.003684317 |
| 1370546_at   | unc-13 homolog C (C. elegans)                                                                                                                                                                                | Unc13c                  | 0.3 | 0.000195031 | 0.003684317 |
| 1369035_a_at | potassium inwardly-rectifying channel, subfamily J, member 6                                                                                                                                                 | Kcnj6                   | 0.5 | 0.000195445 | 0.003684317 |
| 1396237_at   | Transcribed locus                                                                                                                                                                                            | ---                     | 0.6 | 0.000195568 | 0.003684317 |
| 1382632_at   | roundabout homolog 2 (Drosophila)                                                                                                                                                                            | Robo2                   | 0.4 | 0.000195696 | 0.003684317 |
| 1381904_at   | G7c protein                                                                                                                                                                                                  | G7c                     | 0.6 | 0.000195774 | 0.003684317 |
| 1394070_at   | ---                                                                                                                                                                                                          | ---                     | 0.5 | 0.000198465 | 0.003726432 |
| 1398330_at   | syntaxin binding protein 1                                                                                                                                                                                   | Stxbp1                  | 0.6 | 0.000201386 | 0.003772665 |
| 1368120_at   | NEL-like 1 (chicken)                                                                                                                                                                                         | Nell1                   | 0.5 | 0.000202136 | 0.003778109 |
| 1379662_a_at | Transcribed locus                                                                                                                                                                                            | ---                     | 0.5 | 0.000202905 | 0.003788176 |
| 1382924_at   | pantothenate kinase 1 (predicted)                                                                                                                                                                            | Pank1_predicted         | 0.4 | 0.00020535  | 0.003811252 |

|              |                                                                                                                        |                         |     |             |             |
|--------------|------------------------------------------------------------------------------------------------------------------------|-------------------------|-----|-------------|-------------|
| 1391092_at   | Transcribed locus                                                                                                      | ---                     | 0.5 | 0.00020562  | 0.003811252 |
| 1384025_at   | Transcribed locus                                                                                                      | ---                     | 0.5 | 0.000205939 | 0.003811252 |
| 1379374_at   | plasticity related gene 1                                                                                              | Prg1                    | 0.5 | 0.000214961 | 0.0039329   |
| 1368523_at   | Ca2+-dependent secretion activator                                                                                     | Cadps                   | 0.6 | 0.000220655 | 0.004023646 |
| 1372051_at   | rhomboid, veinlet-like 7 (Drosophila) (predicted)                                                                      | Rhbdl7_predicted        | 0.5 | 0.000221014 | 0.004025739 |
| 1383309_at   | ST3 beta-galactoside alpha-2,3-sialyltransferase 6                                                                     | St3gal6                 | 0.5 | 0.000221499 | 0.004025815 |
| 1384368_at   | DNA2 DNA replication helicase 2-like (yeast) (predicted)                                                               | Dna2l_predicted         | 0.4 | 0.000221699 | 0.004025815 |
| 1376021_at   | Transcribed locus, strongly similar to XP_001081813.1 similar to leucine rich repeat containing 45 [Rattus norvegicus] | ---                     | 0.6 | 0.0002235   | 0.004048591 |
| 1382225_at   | Transcribed locus                                                                                                      | ---                     | 0.5 | 0.000225276 | 0.00406733  |
| 1398412_at   | Transcribed locus                                                                                                      | ---                     | 0.4 | 0.000228049 | 0.00409939  |
| 1372825_at   | Formin binding protein 1                                                                                               | Fnbp1                   | 0.7 | 0.00022872  | 0.004106971 |
| 1379414_at   | similar to CG4502-PA, isoform A                                                                                        | LOC679949 /// LOC682677 | 0.4 | 0.000230028 | 0.004125181 |
| 1383493_at   | Transcribed locus                                                                                                      | ---                     | 0.4 | 0.000230236 | 0.004125181 |
| 1369116_a_at | calcitonin/calcitonin-related polypeptide, alpha                                                                       | Calca                   | 0.3 | 0.000230831 | 0.004129173 |
| 1378738_at   | potassium voltage-gated channel, shaker-related subfamily, beta member 1                                               | Kcnab1                  | 0.4 | 0.000230961 | 0.004129173 |
| 1378424_at   | tripartite motif protein 46 (predicted)                                                                                | Trim46_predicted        | 0.6 | 0.000231527 | 0.0041348   |
| 1389550_at   | SH3-domain GRB2-like 2                                                                                                 | Sh3gl2                  | 0.5 | 0.000234416 | 0.004170779 |
| 1398615_at   | Transcribed locus                                                                                                      | ---                     | 0.4 | 0.000234417 | 0.004170779 |
| 1372755_at   | mal, T-cell differentiation protein 2                                                                                  | Mal2                    | 0.4 | 0.000234523 | 0.004170779 |
| 1377773_at   | Transcribed locus, weakly similar to NP_766020.1 cDNA C030002O17 [Mus musculus]                                        | ---                     | 0.5 | 0.000234556 | 0.004170779 |
| 1378909_at   | Transcribed locus                                                                                                      | ---                     | 0.4 | 0.000235547 | 0.004180784 |
| 1391765_at   | leucine rich repeat containing 48                                                                                      | Lrrc48                  | 0.6 | 0.000236546 | 0.004180784 |
| 1397232_at   | leucine rich repeat neuronal 1                                                                                         | Lrrn1                   | 0.5 | 0.000236625 | 0.004180784 |
| 1381233_at   | Transcribed locus                                                                                                      | ---                     | 0.3 | 0.000236809 | 0.004180784 |
| 1373465_at   | PQ loop repeat containing 1                                                                                            | Pqlc1                   | 0.3 | 0.000236898 | 0.004180784 |
| 1368986_at   | solute carrier family 17 (sodium-dependent inorganic phosphate cotransporter), member 7                                | Slc17a7                 | 0.6 | 0.000239274 | 0.004218195 |
| 1379452_at   | similar to growth arrest-specific protein 2 - mouse (predicted)                                                        | RGD1563167_predicted    | 0.6 | 0.00024137  | 0.004246043 |
| 1378310_at   | similar to neuromedin B precursor - rat (predicted)                                                                    | RGD1562710_predicted    | 0.3 | 0.000242038 | 0.004253247 |
| 1389540_at   | similar to IQ motif and Sec7 domain 1                                                                                  | LOC686590               | 0.5 | 0.000243906 | 0.004272382 |
| 1368572_a_at | glutamate receptor, ionotropic, N-methyl D-aspartate 1                                                                 | Grin1                   | 0.4 | 0.000247596 | 0.004304926 |
| 1390244_at   | spermatogenesis associated, serine-rich 2 (predicted)                                                                  | Spats2_predicted        | 0.6 | 0.000248714 | 0.004314461 |
| 1368958_at   | protein kinase C and casein kinase substrate in neurons 1                                                              | Pacsin1                 | 0.2 | 0.000248931 | 0.004314461 |
| 1389278_at   | TSPY-like 2 (predicted)                                                                                                | Tspy2_predicted         | 0.4 | 0.000253089 | 0.004372698 |
| 1382835_at   | Transcribed locus                                                                                                      | ---                     | 0.5 | 0.000255728 | 0.004410634 |
| 1373734_at   | ---                                                                                                                    | ---                     | 0.5 | 0.000257637 | 0.004423394 |
| 1391089_at   | ---                                                                                                                    | ---                     | 0.5 | 0.000260285 | 0.004454917 |
| 1368276_at   | synaptophysin                                                                                                          | Syp                     | 0.4 | 0.000260616 | 0.004455937 |
| 1377632_at   | similar to Metalloproteinase inhibitor 4 precursor (TIMP-4) (Tissue inhibitor of metalloproteinases-4)                 | LOC678834 /// LOC680130 | 0.4 | 0.000261395 | 0.00446308  |
| 1393295_at   | similar to RIKEN cDNA 2610019F03                                                                                       | LOC498662               | 0.6 | 0.000262388 | 0.004468034 |
| 1374619_at   | tumor suppressor candidate 5                                                                                           | Tusc5                   | 0.5 | 0.000262682 | 0.004468034 |
| 1380011_at   | Transcribed locus                                                                                                      | ---                     | 0.4 | 0.000266929 | 0.004516924 |
| 1370110_at   | potassium channel, subfamily K, member 4                                                                               | Kcnk4                   | 0.2 | 0.000267238 | 0.004517498 |
| 1379482_at   | transmembrane 6 superfamily member 1 (predicted)                                                                       | Tm6sf1_predicted        | 0.5 | 0.000269437 | 0.004541834 |
| 1373265_at   | Transcribed locus                                                                                                      | ---                     | 0.7 | 0.000271675 | 0.004559701 |
| 1392644_s_at | similar to RIKEN cDNA 2610019F03                                                                                       | LOC498662               | 0.4 | 0.000273325 | 0.004579388 |
| 1396542_at   | Transcribed locus                                                                                                      | ---                     | 0.4 | 0.000273405 | 0.004579388 |
| 1373689_at   | Transcribed locus                                                                                                      | ---                     | 0.6 | 0.000275004 | 0.004596822 |
| 1390792_a_at | Transcribed locus                                                                                                      | ---                     | 0.6 | 0.000275816 | 0.004600963 |
| 1398433_at   | Transcribed locus                                                                                                      | ---                     | 0.5 | 0.000276269 | 0.004600963 |
| 1391241_at   | Transcribed locus                                                                                                      | ---                     | 0.5 | 0.000277686 | 0.004608172 |
| 1378111_at   | Transcribed locus                                                                                                      | ---                     | 0.3 | 0.000277925 | 0.004608172 |

|              |                                                                                                                |                      |     |             |             |
|--------------|----------------------------------------------------------------------------------------------------------------|----------------------|-----|-------------|-------------|
| 1385043_at   | similar to channel-interacting PDZ domain protein isoform 1 (predicted)                                        | RGD1565362_predicted | 0.3 | 0.000279389 | 0.00462778  |
| 1368690_a_at | glutamate receptor, metabotropic 4                                                                             | Grm4                 | 0.6 | 0.000281072 | 0.004643352 |
| 1383459_at   | leucine-rich repeat LGI family, member 3 (predicted)                                                           | Lgi3_predicted       | 0.3 | 0.000281247 | 0.004643352 |
| 1380228_at   | similar to hypothetical protein MGC47816 (predicted)                                                           | RGD1306880_predicted | 0.3 | 0.000284251 | 0.004683546 |
| 1393359_at   | adaptor-related protein complex 3, beta 2 subunit (predicted)                                                  | Ap3b2_predicted      | 0.5 | 0.000284464 | 0.004683546 |
| 1397439_at   | similar to diacylglycerol kinase epsilon                                                                       | LOC497978            | 0.6 | 0.000286369 | 0.004695834 |
| 1390555_at   | similar to Suppressor of cytokine signaling 5 (predicted)                                                      | RGD1564914_predicted | 0.6 | 0.00028643  | 0.004695834 |
| 1383084_at   | Transcribed locus                                                                                              | ---                  | 0.5 | 0.000286638 | 0.004695834 |
| 1388462_at   | SH3-binding kinase 1                                                                                           | Sbk1                 | 0.4 | 0.000292333 | 0.004770133 |
| 1393783_at   | ---                                                                                                            | ---                  | 0.5 | 0.000296139 | 0.004808393 |
| 1374644_at   | Transcribed locus                                                                                              | ---                  | 0.4 | 0.000298477 | 0.004836983 |
| 1382734_at   | jagged 2                                                                                                       | Jag2                 | 0.3 | 0.000300169 | 0.004854648 |
| 1384243_at   | Transcribed locus                                                                                              | ---                  | 0.6 | 0.000301789 | 0.0048665   |
| 1373774_at   | Ras-like without CAAX 2                                                                                        | Rit2                 | 0.4 | 0.000302168 | 0.004867834 |
| 1371081_at   | Rap guanine nucleotide exchange factor (GEF) 4 amyloid beta (A4) precursor protein-binding, family B, member 3 | Rapgef4              | 0.3 | 0.000303558 | 0.004878719 |
| 1387185_at   | microtubule-associated protein 7 (predicted)                                                                   | Apbb3                | 0.6 | 0.000305864 | 0.004908146 |
| 1392916_at   | Catenin (cadherin-associated protein), delta 2                                                                 | Mtap7_predicted      | 0.5 | 0.000312085 | 0.004985605 |
| 1377712_at   | potassium voltage gated channel, Shaw-related subfamily, member 2                                              | Ctnnd2               | 0.4 | 0.000312207 | 0.004985605 |
| 1370439_a_at | UDP-N-acetyl-alpha-D-galactosamine:polypeptide N-acetylgalactosaminyltransferase 14                            | Kcnc2                | 0.5 | 0.000316653 | 0.005029307 |
| 1396238_at   | ---                                                                                                            | Galnt14              | 0.4 | 0.000317092 | 0.005029434 |
| 1380046_at   | Similar to nucleosome assembly protein 1-like 5                                                                | MGC105733            | 0.4 | 0.000318483 | 0.00504663  |
| 1380345_at   | Transcribed locus                                                                                              | ---                  | 0.6 | 0.000324109 | 0.005091641 |
| 1387322_at   | sema domain, transmembrane domain (TM), and cytoplasmic domain, (semaphorin) 6B                                | Sema6b               | 0.6 | 0.000324933 | 0.005096574 |
| 1394553_at   | Transcribed locus                                                                                              | ---                  | 0.5 | 0.000325043 | 0.005096574 |
| 1392555_at   | Ets variant gene 1 (predicted)                                                                                 | Etv1_predicted       | 0.5 | 0.000329304 | 0.005143767 |
| 1396313_at   | Transcribed locus                                                                                              | ---                  | 0.7 | 0.000330374 | 0.005150704 |
| 1370328_at   | dickkopf homolog 3 (Xenopus laevis)                                                                            | Dkk3                 | 0.6 | 0.000330971 | 0.00515512  |
| 1371361_at   | tensin /// similar to tensin                                                                                   | LOC301509 ///        | 0.5 | 0.000332261 | 0.005163352 |
| 1385925_at   | Transcribed locus                                                                                              | Tns                  | 0.5 | 0.000332441 | 0.005163352 |
| 1373995_at   | ---                                                                                                            | ---                  | 0.4 | 0.000333496 | 0.005173216 |
| 1378107_at   | Transcribed locus                                                                                              | ---                  | 0.4 | 0.000334078 | 0.005174118 |
| 1384202_at   | similar to Tescalcin (predicted)                                                                               | RGD1566317_predicted | 0.5 | 0.000335071 | 0.005184613 |
| 1383061_at   | Transcribed locus                                                                                              | ---                  | 0.6 | 0.000335728 | 0.005186804 |
| 1390892_at   | DEP domain containing 1B (predicted)                                                                           | Depdc1b_predicted    | 0.5 | 0.000335843 | 0.005186804 |
| 1392003_at   | similar to KIAA0316 protein (predicted)                                                                        | RGD1566031_predicted | 0.4 | 0.000337363 | 0.005196847 |
| 1374089_at   | Transcribed locus                                                                                              | ---                  | 0.5 | 0.00033817  | 0.005196847 |
| 1373807_at   | Transcribed locus                                                                                              | ---                  | 0.5 | 0.000338389 | 0.005196847 |
| 1382914_at   | Transcribed locus                                                                                              | ---                  | 0.3 | 0.000340924 | 0.005230897 |
| 1370267_at   | glycogen synthase kinase 3 beta                                                                                | Gsk3b                | 0.5 | 0.000341489 | 0.005234675 |
| 1382138_at   | similar to Notch-regulated ankyrin repeat protein                                                              | LOC499745 ///        | 0.5 | 0.000343603 | 0.00526218  |
| 1382944_at   | ---                                                                                                            | LOC688240            | 0.5 | 0.000347425 | 0.005292591 |
| 1372300_at   | docking protein 4 (predicted)                                                                                  | Dok4_predicted       | 0.4 | 0.000347519 | 0.005292591 |
| 1391547_at   | CDNA clone IMAGE:7320555                                                                                       | ---                  | 0.5 | 0.000348149 | 0.005297269 |
| 1367660_at   | fatty acid binding protein 3                                                                                   | Fabp3                | 0.4 | 0.000348841 | 0.005302858 |
| 1393350_at   | ---                                                                                                            | ---                  | 0.5 | 0.000350024 | 0.005306176 |
| 1380272_at   | Transcribed locus                                                                                              | ---                  | 0.5 | 0.000350902 | 0.005314582 |
| 1383340_at   | ataxia, cerebellar, Cayman type (caytaxin) (predicted)                                                         | Atcay_predicted      | 0.6 | 0.000351977 | 0.005324119 |
| 1376726_at   | ---                                                                                                            | ---                  | 0.5 | 0.000352179 | 0.005324119 |
| 1394833_at   | Transcribed locus                                                                                              | ---                  | 0.3 | 0.000359028 | 0.005405027 |
| 1384824_at   | protocadherin 18 (predicted)                                                                                   | Pcdh18_predicted     | 0.6 | 0.000359174 | 0.005405027 |

|              |                                                                                      |                      |     |             |             |
|--------------|--------------------------------------------------------------------------------------|----------------------|-----|-------------|-------------|
| 1371578_at   | protein kinase, cAMP-dependent, catalytic, alpha                                     | Prkaca               | 0.4 | 0.000361608 | 0.005428713 |
| 1392619_at   | Transcribed locus                                                                    | ---                  | 0.6 | 0.000361738 | 0.005428713 |
| 1384877_at   | aquaporin 11                                                                         | Aqp11                | 0.4 | 0.000363655 | 0.005447533 |
| 1394455_at   | Transcribed locus                                                                    | ---                  | 0.5 | 0.000365087 | 0.005460426 |
| 1383824_at   | LIM domain binding 2 (predicted)                                                     | Ldb2_predicted       | 0.6 | 0.00036637  | 0.005473249 |
| 1374213_at   | ADP-ribosylation factor guanine nucleotide-exchange factor 2 (brefeldin A-inhibited) | Arfgef2              | 0.5 | 0.000366726 | 0.005473605 |
| 1391472_at   | DAZ interacting protein 1                                                            | Dzip1                | 0.6 | 0.000367909 | 0.005483694 |
| 1375639_at   | Transcribed locus                                                                    | ---                  | 0.5 | 0.000368676 | 0.005483694 |
| 1379052_at   | Transcribed locus                                                                    | ---                  | 0.6 | 0.00036868  | 0.005483694 |
| 1394297_at   | homeo box D1 (predicted)                                                             | Hoxd1_predicted      | 0.2 | 0.000368736 | 0.005483694 |
| 1372695_at   | Fibronectin type III domain containing 5                                             | Fndc5                | 0.4 | 0.000372351 | 0.005532457 |
| 1380766_a_at | similar to RIKEN cDNA 8430427H17 gene (predicted)                                    | RGD1563510_predicted | 0.6 | 0.000375661 | 0.005568157 |
| 1389752_at   | sortilin-related VPS10 domain containing receptor 3 (predicted)                      | Sorcs3_predicted     | 0.5 | 0.000376624 | 0.005570788 |
| 1394816_at   | Transcribed locus                                                                    | ---                  | 0.6 | 0.000381011 | 0.005615439 |
| 1397666_at   | Transcribed locus                                                                    | ---                  | 0.4 | 0.000381197 | 0.005615439 |
| 1396023_at   | Transcribed locus                                                                    | ---                  | 0.3 | 0.000385981 | 0.005668405 |
| 1383122_at   | protein kinase, AMP-activated, gamma 2 non-catalytic subunit                         | Prkag2               | 0.5 | 0.000389756 | 0.005713642 |
| 1369001_at   | cholinergic receptor, nicotinic, alpha polypeptide 3                                 | Chrna3               | 0.2 | 0.000393964 | 0.005754813 |
| 1377882_at   | FMS-like tyrosine kinase 3                                                           | Flt3                 | 0.5 | 0.000395757 | 0.005769901 |
| 1390164_at   | Transcribed locus                                                                    | ---                  | 0.6 | 0.000400357 | 0.005817204 |
| 1373545_at   | Transcribed locus                                                                    | ---                  | 0.4 | 0.000401768 | 0.005832432 |
| 1372423_at   | PERP, TP53 apoptosis effector (predicted)                                            | Perp_predicted       | 0.4 | 0.000402505 | 0.005832432 |
| 1398525_at   | Transcribed locus                                                                    | ---                  | 0.5 | 0.000402824 | 0.005832432 |
| 1378396_at   | Transcribed locus                                                                    | ---                  | 0.6 | 0.000403966 | 0.005833935 |
| 1377185_at   | similar to RIKEN cDNA 6330442E10 gene (predicted)                                    | RGD1562622_predicted | 0.5 | 0.00040526  | 0.005841989 |
| 1371108_a_at | ATPase, Na <sup>+</sup> /K <sup>+</sup> transporting, alpha 1 polypeptide            | Atp1a1               | 0.2 | 0.000407056 | 0.005862746 |
| 1392045_at   | transmembrane protein 22                                                             | Tmem22               | 0.5 | 0.000409816 | 0.0058819   |
| 1392444_at   | similar to N-acetylglucosamine 6-O-sulfotransferase (predicted)                      | RGD1561144_predicted | 0.5 | 0.00041067  | 0.00588902  |
| 1392944_at   | similar to talin 2 (predicted)                                                       | RGD1565416_predicted | 0.7 | 0.000415367 | 0.005937926 |
| 1378214_at   | N-acetylgalactosamine 4-sulfate 6-O-sulfotransferase                                 | GalNAc4S6ST          | 0.4 | 0.000415525 | 0.005937926 |
| 1373336_at   | G protein-coupled receptor, family C, group 5, member B (predicted)                  | Gprc5b_predicted     | 0.7 | 0.000416066 | 0.005940497 |
| 1378246_at   | similar to T-cell activation protein phosphatase 2C (predicted)                      | RGD1310383_predicted | 0.5 | 0.000419431 | 0.005976639 |
| 1368153_a_at | nasal embryonic LHRH factor                                                          | Nelf                 | 0.6 | 0.000419979 | 0.005976639 |
| 1383274_at   | poly(rC) binding protein 3                                                           | Pcbp3                | 0.5 | 0.000420414 | 0.005976639 |
| 1388675_at   | similar to spinster-like protein                                                     | RGD1305613           | 0.5 | 0.000421988 | 0.005988662 |
| 1368255_at   | neurotrimin                                                                          | Hnt                  | 0.6 | 0.000423268 | 0.006001655 |
| 1376980_at   | Transcribed locus                                                                    | ---                  | 0.4 | 0.000426863 | 0.006031822 |
| 1367918_at   | fasciculation and elongation protein zeta 1 (zyglin I)                               | Fez1                 | 0.5 | 0.000431433 | 0.006076409 |
| 1382851_at   | Transcribed locus                                                                    | ---                  | 0.6 | 0.000431496 | 0.006076409 |
| 1376925_at   | palmdelphin                                                                          | Palmd                | 0.6 | 0.000433649 | 0.006101501 |
| 1380486_at   | similar to SEC22 vesicle trafficking protein-like 3                                  | LOC687022            | 0.7 | 0.000435889 | 0.006127773 |
| 1371331_at   | folliculin-like 1                                                                    | Fstl1                | 0.5 | 0.000438804 | 0.0061549   |
| 1379632_at   | Similar to mitochondrial carrier family protein                                      | RGD1308774           | 0.6 | 0.000439383 | 0.0061549   |
| 1374013_at   | C1q and tumor necrosis factor related protein 5                                      | C1qtnf5              | 0.5 | 0.000439592 | 0.0061549   |
| 1368044_at   | secretogranin 2                                                                      | Scg2                 | 0.3 | 0.000441981 | 0.006176473 |
| 1372994_at   | similar to Fanconi anemia, complementation group E (predicted)                       | RGD1561045_predicted | 0.7 | 0.000447361 | 0.006235176 |
| 1368768_at   | sodium channel, voltage-gated, type XI, alpha                                        | Scn11a               | 0.2 | 0.000447698 | 0.006235176 |
| 1383216_at   | similar to mKIAA0431 protein                                                         | RGD1305781           | 0.5 | 0.000452481 | 0.006291133 |
| 1376443_at   | Regulator of G-protein signalling 3                                                  | Rgs3                 | 0.4 | 0.000457202 | 0.006341421 |
| 1368152_at   | zinc finger, DHHC domain containing 7                                                | Zdhhc7               | 0.6 | 0.000457255 | 0.006341421 |
| 1370680_at   | staufer, RNA binding protein, homolog 2 (Drosophila)                                 | Stau2                | 0.5 | 0.000458718 | 0.006356358 |

|              |                                                                                                                               |                            |     |             |             |
|--------------|-------------------------------------------------------------------------------------------------------------------------------|----------------------------|-----|-------------|-------------|
| 1390999_at   | Transcribed locus                                                                                                             | ---                        | 0.5 | 0.000459251 | 0.006358388 |
| 1385016_at   | similar to RIKEN cDNA B630019K06 (predicted)                                                                                  | RGD1560784_pre<br>dicted   | 0.4 | 0.000461504 | 0.006373485 |
| 1372482_at   | solute carrier family 39 (zinc transporter), member 13                                                                        | Slc39a13                   | 0.6 | 0.00046519  | 0.00641362  |
| 1385749_at   | Transcribed locus                                                                                                             | ---                        | 0.5 | 0.000466206 | 0.006422247 |
| 1391976_at   | Transcribed locus                                                                                                             | ---                        | 0.4 | 0.000473463 | 0.006483334 |
| 1372629_at   | similar to KIAA0925 protein                                                                                                   | LOC300768                  | 0.6 | 0.000473794 | 0.006483334 |
| 1370675_at   | transient receptor potential cation channel, subfamily V, member 1                                                            | Trpv1                      | 0.3 | 0.000478459 | 0.006530871 |
| 1395331_at   | similar to hypothetical protein CL25084 (predicted)                                                                           | RGD1306508_pre<br>dicted   | 0.4 | 0.000482969 | 0.006565181 |
| 1383319_at   | solute carrier family 4, sodium bicarbonate transporter-like, member 11 (predicted)                                           | Slc4a11_predicted          | 0.6 | 0.000485158 | 0.006584052 |
| 1374445_at   | G protein-coupled receptor 162 (predicted)                                                                                    | Gpr162_predicted           | 0.5 | 0.000485874 | 0.006588338 |
| 1376656_at   | ubiquitin specific protease 20 (predicted)                                                                                    | Usp20_predicted            | 0.6 | 0.00048628  | 0.006588412 |
| 1397983_at   | Transcribed locus                                                                                                             | ---                        | 0.4 | 0.000487831 | 0.006598553 |
| 1390799_at   | Transcribed locus                                                                                                             | ---                        | 0.6 | 0.000490592 | 0.006615438 |
| 1372539_at   | Transcribed locus                                                                                                             | ---                        | 0.4 | 0.00049109  | 0.006615438 |
| 1389109_at   | Transcribed locus                                                                                                             | ---                        | 0.7 | 0.000497025 | 0.006684431 |
| 1383219_at   | ---                                                                                                                           | ---                        | 0.5 | 0.000498232 | 0.006695191 |
| 1380866_at   | similar to adenylate kinase 5 isoform 1                                                                                       | LOC365985                  | 0.4 | 0.000503684 | 0.006757419 |
| 1392221_at   | Similar to GREB1 protein isoform a (predicted)                                                                                | RGD1562371_pre<br>dicted   | 0.5 | 0.000505558 | 0.006771508 |
| 1394564_at   | Transcribed locus                                                                                                             | ---                        | 0.6 | 0.000506065 | 0.006772792 |
| 1394392_at   | similar to dJ881L22.2 (novel protein) (predicted)                                                                             | RGD1307696_pre<br>dicted   | 0.4 | 0.000513451 | 0.006854903 |
| 1374062_x_at | microtubule-associated protein, RP/EB family, member 3                                                                        | Mapre3                     | 0.3 | 0.000514862 | 0.00686495  |
| 1384780_at   | copine IV (predicted)                                                                                                         | Cpne4_predicted            | 0.4 | 0.000515038 | 0.00686495  |
| 1378763_at   | hypothetical gene supported by BC088439                                                                                       | LOC500947                  | 0.5 | 0.000515572 | 0.006866497 |
| 1372490_at   | Transcribed locus                                                                                                             | ---                        | 0.6 | 0.000521882 | 0.006933697 |
| 1367956_at   | neurochondrin                                                                                                                 | Ncdn                       | 0.3 | 0.000523412 | 0.006942942 |
| 1368904_at   | calpain 10                                                                                                                    | Capn10                     | 0.6 | 0.000525111 | 0.006942942 |
| 1383777_at   | Transcribed locus                                                                                                             | ---                        | 0.6 | 0.000526214 | 0.00695194  |
| 1384287_at   | Transcribed locus                                                                                                             | ---                        | 0.7 | 0.000528068 | 0.006970842 |
| 1394577_at   | Transcribed locus                                                                                                             | ---                        | 0.4 | 0.000529471 | 0.006983754 |
| 1389313_at   | Transcribed locus, weakly similar to XP_001170787.1 phosphofurin acidic cluster sorting protein 1 isoform 4 [Pan troglodytes] | ---                        | 0.6 | 0.000530408 | 0.006990506 |
| 1376183_at   | Transcribed locus                                                                                                             | ---                        | 0.3 | 0.00053495  | 0.007007317 |
| 1391560_at   | human immunodeficiency virus type I enhancer binding protein 1                                                                | Hivep1                     | 0.3 | 0.000539248 | 0.007042452 |
| 1369210_at   | sodium channel, voltage-gated, type I, alpha                                                                                  | Scn1a                      | 0.4 | 0.000539487 | 0.007042452 |
| 1393126_at   | ubiquitin domain containing 1                                                                                                 | Ubt1                       | 0.6 | 0.000540982 | 0.007056363 |
| 1368185_at   | guanine nucleotide binding protein, alpha z subunit                                                                           | Gnaz                       | 0.5 | 0.000543703 | 0.007086239 |
| 1373212_at   | mitochondrial ATP synthase regulatory component factor B                                                                      | Atp5s                      | 0.5 | 0.000546598 | 0.007112697 |
| 1392739_a_at | similar to RIKEN cDNA 2310005P05                                                                                              | RGD1307401                 | 0.5 | 0.000548198 | 0.007122245 |
| 1368890_at   | glyceronephosphate O-acyltransferase                                                                                          | Gnpat                      | 0.5 | 0.00055003  | 0.00712915  |
| 1377059_at   | Transcribed locus                                                                                                             | ---                        | 0.7 | 0.000551853 | 0.007144225 |
| 1369500_at   | potassium channel, subfamily K, member 1                                                                                      | Kcnk1                      | 0.5 | 0.000554062 | 0.007153232 |
| 1374929_at   | similar to RIKEN cDNA 6330407D12 (predicted)                                                                                  | RGD1561171_pre<br>dicted   | 0.5 | 0.000565348 | 0.007271242 |
| 1385526_at   | similar to autophagy 5-like                                                                                                   | LOC365601                  | 0.6 | 0.000568729 | 0.00729108  |
| 1393502_at   | similar to predicted CDS, putative protein of bilateral origin (4J193)                                                        | RGD1306153                 | 0.6 | 0.000575265 | 0.007357664 |
| 1383887_at   | similar to Protein C20orf103 precursor                                                                                        | RGD1306991                 | 0.3 | 0.000576888 | 0.007362322 |
| 1388998_at   | erythrocyte protein band 4.9 (predicted)                                                                                      | Epb4.9_predicted           | 0.5 | 0.000577963 | 0.007362322 |
| 1368197_at   | opioid receptor, kappa 1                                                                                                      | Oprk1                      | 0.4 | 0.000578485 | 0.007362322 |
| 1374952_at   | similar to expressed sequence A1428855                                                                                        | LOC684849 ///<br>LOC689984 | 0.5 | 0.00057876  | 0.007362322 |
| 1378102_at   | similar to cDNA sequence AF096286; pecanex 1 (predicted)                                                                      | RGD1305883_pre<br>dicted   | 0.5 | 0.000578778 | 0.007362322 |
| 1387164_at   | leukocyte cell derived chemotaxin 1                                                                                           | Lect1                      | 0.6 | 0.00057921  | 0.007362322 |
| 1391916_at   | Transcribed locus                                                                                                             | ---                        | 0.6 | 0.000579816 | 0.00736433  |
| 1385643_at   | Transcribed locus                                                                                                             | ---                        | 0.6 | 0.000582342 | 0.0073796   |

|            |                                                                                                         |                                                        |     |             |             |
|------------|---------------------------------------------------------------------------------------------------------|--------------------------------------------------------|-----|-------------|-------------|
| 1389015_at | similar to FUN14 domain containing 2 (predicted)                                                        | RGD1560916_predicted                                   | 0.5 | 0.000582364 | 0.0073796   |
| 1386615_at | carbohydrate sulfotransferase 2 (predicted)                                                             | Chst2_predicted                                        | 0.4 | 0.000582986 | 0.007381795 |
| 1372708_at | ---                                                                                                     | ---                                                    | 0.5 | 0.000584789 | 0.007394963 |
| 1379997_at | Transcribed locus                                                                                       | ---                                                    | 0.5 | 0.000585824 | 0.007394963 |
| 1387065_at | phospholipase C, delta 4                                                                                | Plcd4                                                  | 0.2 | 0.000588125 | 0.007418314 |
| 1387004_at | neuroblastoma, suppression of tumorigenicity 1                                                          | Nbl1                                                   | 0.4 | 0.000592591 | 0.007468913 |
| 1391262_at | similar to SUMO/sentrin specific protease 5 (predicted) /// similar to SUMO/sentrin specific protease 5 | LOC686268 ///<br>LOC690251 ///<br>RGD1564247_predicted | 0.3 | 0.00059436  | 0.007485478 |
| 1372275_at | Transcribed locus                                                                                       | ---                                                    | 0.5 | 0.000597176 | 0.007510856 |
| 1370078_at | lin-7 homolog b (C. elegans)                                                                            | Lin7b                                                  | 0.3 | 0.000602299 | 0.00755077  |
| 1379373_at | Transcribed locus                                                                                       | ---                                                    | 0.4 | 0.000604308 | 0.007570184 |
| 1383612_at | Transcribed locus                                                                                       | ---                                                    | 0.6 | 0.000612708 | 0.007652108 |
| 1373931_at | similar to RIKEN cDNA C530028O21 gene                                                                   | RGD1304952                                             | 0.6 | 0.000615379 | 0.007673813 |
| 1380914_at | A kinase (PKA) anchor protein 5                                                                         | Akap5                                                  | 0.7 | 0.000615954 | 0.007675161 |
| 1379419_at | transmembrane protein 34                                                                                | Tmem34                                                 | 0.6 | 0.000620738 | 0.007723067 |
| 1376736_at | hypothetical protein LOC683263                                                                          | LOC683263                                              | 0.4 | 0.000622136 | 0.007734614 |
| 1382593_at | ets variant gene 1 (predicted)                                                                          | Etv1_predicted                                         | 0.6 | 0.000623264 | 0.007736935 |
| 1373729_at | Transcribed locus                                                                                       | ---                                                    | 0.5 | 0.000631593 | 0.007808467 |
| 1372398_at | similar to potassium channel tetramerisation domain containing 15                                       | LOC499129                                              | 0.5 | 0.000631973 | 0.007808467 |
| 1368121_at | aldo-keto reductase family 7, member A3 (aflatoxin aldehyde reductase)                                  | Akr7a3                                                 | 0.5 | 0.000632349 | 0.007808467 |
| 1390240_at | Transcribed locus                                                                                       | ---                                                    | 0.6 | 0.000634752 | 0.007826388 |
| 1367994_at | dihydropyrimidine dehydrogenase                                                                         | Dpyd                                                   | 0.6 | 0.000635749 | 0.00783217  |
| 1388246_at | clusterin                                                                                               | Clu                                                    | 0.5 | 0.000639996 | 0.007859516 |
| 1384866_at | ectonucleoside triphosphate diphosphohydrolase 3                                                        | Entpd3                                                 | 0.3 | 0.000643622 | 0.007888442 |
| 1380317_at | cadherin 10                                                                                             | Cdh10                                                  | 0.5 | 0.000647075 | 0.00791308  |
| 1372682_at | similar to RIKEN cDNA 2810432L12                                                                        | RGD1307218                                             | 0.5 | 0.000648027 | 0.007918837 |
| 1370415_at | Ras association (RalGDS/AF-6) domain family 5                                                           | Rassf5                                                 | 0.6 | 0.000649742 | 0.007933897 |
| 1373832_at | sorting nexin 19 (predicted)                                                                            | Snx19_predicted                                        | 0.7 | 0.000653351 | 0.007972045 |
| 1392815_at | Centaurin, delta 1 (predicted)                                                                          | Centd1_predicted                                       | 0.4 | 0.000654037 | 0.007974504 |
| 1377288_at | heat shock transcription factor 4 (predicted)                                                           | Hsf4_predicted                                         | 0.6 | 0.000659517 | 0.00801754  |
| 1396117_at | similar to leucine zipper protein 2 (predicted)                                                         | RGD1563838_predicted                                   | 0.5 | 0.000663305 | 0.008045758 |
| 1398446_at | similar to chromosome 1 open reading frame 2 (predicted)                                                | RGD1306107_predicted                                   | 0.5 | 0.00066482  | 0.008058192 |
| 1376904_at | similar to hypothetical protein MGC33486 (predicted)                                                    | RGD1310680_predicted                                   | 0.5 | 0.000668963 | 0.00809021  |
| 1383346_at | similar to ERCC4_MOUSE (predicted)                                                                      | RGD1560340_predicted                                   | 0.7 | 0.000669129 | 0.00809021  |
| 1376893_at | vesicular membrane protein p24 (predicted)                                                              | Vmp_predicted                                          | 0.4 | 0.000669429 | 0.00809021  |
| 1380380_at | Tubulin tyrosine ligase                                                                                 | Ttl                                                    | 0.6 | 0.000672588 | 0.008114339 |
| 1372669_at | Transcribed locus                                                                                       | ---                                                    | 0.4 | 0.000672906 | 0.008114339 |
| 1383447_at | ets variant gene 5 (ets-related molecule) (predicted)                                                   | Etv5_predicted                                         | 0.6 | 0.000674442 | 0.008126605 |
| 1374486_at | Rho guanine nucleotide exchange factor (GEF) 11                                                         | Arhgef11                                               | 0.6 | 0.000680437 | 0.00817706  |
| 1389963_at | p53 protein                                                                                             | LOC652956                                              | 0.4 | 0.000680593 | 0.00817706  |
| 1377523_at | similar to dachshund b                                                                                  | LOC686314                                              | 0.7 | 0.000681883 | 0.008186574 |
| 1390068_at | nuclear factor, erythroid derived 2,-like 1 (predicted)                                                 | Nfe2l1_predicted                                       | 0.7 | 0.000682917 | 0.008193014 |
| 1383443_at | similar to UPF0308 protein C9orf21                                                                      | LOC498685                                              | 0.5 | 0.000687114 | 0.008237671 |
| 1392315_at | REV1-like (S. cerevisiae) (predicted)                                                                   | Rev11_predicted                                        | 0.6 | 0.00069056  | 0.008255985 |
| 1383861_at | Transcribed locus                                                                                       | ---                                                    | 0.5 | 0.000690572 | 0.008255985 |
| 1399040_at | glucosidase beta 2                                                                                      | Gba2                                                   | 0.7 | 0.000690676 | 0.008255985 |
| 1377044_at | Transcribed locus                                                                                       | ---                                                    | 0.5 | 0.000691339 | 0.008256224 |
| 1377171_at | leucine zipper, putative tumor suppressor 1                                                             | Lzts1                                                  | 0.6 | 0.000694589 | 0.0082779   |
| 1393197_at | abhydrolase domain containing 8 (predicted)                                                             | Abhd8_predicted                                        | 0.4 | 0.000694662 | 0.0082779   |
| 1374244_at | ---                                                                                                     | ---                                                    | 0.6 | 0.000695339 | 0.0082779   |
| 1382054_at | Transcribed locus                                                                                       | ---                                                    | 0.6 | 0.000695529 | 0.0082779   |
| 1392195_at | Transcribed locus                                                                                       | ---                                                    | 0.4 | 0.000698376 | 0.00829777  |

|              |                                                                                                       |                      |     |             |             |
|--------------|-------------------------------------------------------------------------------------------------------|----------------------|-----|-------------|-------------|
| 1397923_at   | Similar to erythrocyte membrane protein band 4.1 (elliptocytosis 1, RH-linked) isoform 1 (predicted)  | RGD1564762_predicted | 0.6 | 0.000704717 | 0.008350998 |
| 1373581_at   | Similar to KIAA0672 gene product                                                                      | RGD1305664           | 0.6 | 0.000707416 | 0.008372402 |
| 1374466_at   | Transcribed locus                                                                                     | ---                  | 0.5 | 0.00070969  | 0.008386223 |
| 1393223_a_at | similar to RIKEN cDNA 1110008J03 (predicted)                                                          | RGD1306772_predicted | 0.7 | 0.000714637 | 0.008420019 |
| 1373636_at   | sparc/osteonectin, cwcv and kazal-like domains proteoglycan 1                                         | Spock1               | 0.5 | 0.000721357 | 0.008475214 |
| 1376165_at   | solute carrier family 24 (sodium/potassium/calcium exchanger), member 3                               | Slc24a3              | 0.6 | 0.000722748 | 0.008475214 |
| 1380266_at   | Transcribed locus                                                                                     | ---                  | 0.5 | 0.000723349 | 0.008475214 |
| 1377266_at   | Transcribed locus                                                                                     | ---                  | 0.5 | 0.000725994 | 0.008499043 |
| 1378000_at   | Transcribed locus                                                                                     | ---                  | 0.6 | 0.000729433 | 0.008528495 |
| 1373546_at   | Putative UA20 protein                                                                                 | Ua20                 | 0.5 | 0.000729547 | 0.008528495 |
| 1373119_at   | potassium channel tetramerisation domain containing 3                                                 | Kctd3                | 0.6 | 0.000731099 | 0.008540565 |
| 1376222_at   | similar to HCDI protein (predicted)                                                                   | RGD1309307_predicted | 0.7 | 0.000737804 | 0.00859581  |
| 1379437_at   | Transcribed locus                                                                                     | ---                  | 0.6 | 0.000738149 | 0.00859581  |
| 1379617_at   | Similar to CG33331-PA                                                                                 | LOC362419            | 0.7 | 0.000738964 | 0.00859581  |
| 1390839_at   | PQ loop repeat containing 3                                                                           | Pqlc3                | 0.6 | 0.000742524 | 0.008631117 |
| 1383468_at   | Transcribed locus                                                                                     | ---                  | 0.6 | 0.000745223 | 0.008656372 |
| 1384468_at   | Transcribed locus                                                                                     | ---                  | 0.4 | 0.000756399 | 0.008760136 |
| 1388881_at   | similar to RIKEN cDNA 1700012G19 gene (predicted)                                                     | RGD1307773_predicted | 0.7 | 0.000757109 | 0.008760136 |
| 1375032_at   | similar to kinase non-catalytic C-lobe domain (KIND) containing 1 isoform b (predicted)               | RGD1565261_predicted | 0.6 | 0.000762984 | 0.008812896 |
| 1393370_at   | similar to doublecortin-like kinase 2 (predicted)                                                     | Dcl2_predicted       | 0.7 | 0.000768408 | 0.00885688  |
| 1384158_at   | Transcribed locus                                                                                     | ---                  | 0.3 | 0.000769332 | 0.00886132  |
| 1371754_at   | solute carrier family 25 (mitochondrial carrier, phosphate carrier), member 25                        | Slc25a25             | 0.6 | 0.000774402 | 0.008901019 |
| 1392993_at   | ---                                                                                                   | ---                  | 0.6 | 0.000777861 | 0.008922897 |
| 1396428_at   | Transcribed locus                                                                                     | ---                  | 0.5 | 0.000779328 | 0.008925406 |
| 1389533_at   | fibulin 2                                                                                             | Fbln2                | 0.5 | 0.000779779 | 0.008925406 |
| 1396936_at   | Zinc finger protein 532 (predicted)                                                                   | Znf532_predicted     | 0.7 | 0.000783637 | 0.00896332  |
| 1368013_at   | DNA-damage-inducible transcript 4-like                                                                | Ddit4l               | 0.4 | 0.000790575 | 0.009017059 |
| 1373154_at   | similar to mKIAA0998 protein (predicted)                                                              | RGD1563583_predicted | 0.6 | 0.000791076 | 0.009017059 |
| 1368740_at   | purinergic receptor P2X-like 1, orphan receptor                                                       | P2rx1                | 0.2 | 0.000793335 | 0.009025155 |
| 1373594_at   | Transcribed locus                                                                                     | ---                  | 0.5 | 0.000793826 | 0.009025155 |
| 1371077_at   | 5-hydroxytryptamine (serotonin) receptor 3b                                                           | Htr3b                | 0.2 | 0.000793981 | 0.009025155 |
| 1394295_at   | Transcribed locus                                                                                     | ---                  | 0.3 | 0.000800079 | 0.00906034  |
| 1382274_at   | retinoic acid receptor responder (tazarotene induced) 1                                               | Rarres1              | 0.4 | 0.000800381 | 0.00906034  |
| 1397953_at   | similar to AMSH-family protein                                                                        | LOC687696            | 0.5 | 0.000803178 | 0.009085743 |
| 1390500_at   | similar to RIKEN cDNA 9130023F12 gene (predicted)                                                     | RGD1311920_predicted | 0.6 | 0.000805996 | 0.009095741 |
| 1370562_at   | calcitonin-related polypeptide, beta                                                                  | Calcb                | 0.4 | 0.000806274 | 0.009095741 |
| 1387951_at   | decay accelerating factor 1                                                                           | Daf1                 | 0.4 | 0.000809915 | 0.009124301 |
| 1385128_at   | Transcribed locus                                                                                     | ---                  | 0.6 | 0.000818989 | 0.009176249 |
| 1391157_at   | Similar to CG7744-PA                                                                                  | LOC691426            | 0.6 | 0.000820775 | 0.009184672 |
| 1367489_at   | ---                                                                                                   | ---                  | 0.7 | 0.00082224  | 0.009187546 |
| 1390033_at   | ---                                                                                                   | ---                  | 0.4 | 0.000823907 | 0.009187546 |
| 1379769_at   | Transcribed locus                                                                                     | ---                  | 0.4 | 0.000825056 | 0.00919412  |
| 1370385_at   | phospholipase A2, group VI                                                                            | Pla2g6               | 0.7 | 0.000828075 | 0.009220037 |
| 1368939_a_at | neurotrophic tyrosine kinase, receptor, type 3                                                        | Ntrk3                | 0.5 | 0.000828828 | 0.009220037 |
| 1379801_at   | Transcribed locus, strongly similar to XP_580017.1 hypothetical protein XP_580017 [Rattus norvegicus] | ---                  | 0.6 | 0.000829063 | 0.009220037 |
| 1379263_at   | fukutin related protein                                                                               | Fkrp                 | 0.5 | 0.000830403 | 0.009228698 |
| 1388470_at   | F-box only protein 9                                                                                  | Fbxo9                | 0.6 | 0.000832444 | 0.009238889 |
| 1368485_at   | advillin                                                                                              | Avil                 | 0.4 | 0.00084074  | 0.009306809 |
| 1396925_at   | Transcribed locus                                                                                     | ---                  | 0.6 | 0.000840827 | 0.009306809 |
| 1368886_at   | mitogen activated protein kinase kinase kinase 12                                                     | Map3k12              | 0.7 | 0.000845991 | 0.009330312 |

|              |                                                                                                           |                                             |     |             |             |
|--------------|-----------------------------------------------------------------------------------------------------------|---------------------------------------------|-----|-------------|-------------|
| 1368524_at   | potassium voltage gated channel, Shaw-related subfamily, member 1                                         | Kcnc1                                       | 0.4 | 0.000846354 | 0.009330312 |
| 1398393_at   | similar to mitogen-activated protein kinase 11                                                            | LOC679007 ///<br>LOC689314                  | 0.5 | 0.000848922 | 0.009352359 |
| 1380162_at   | RDCR-0918-3 protein                                                                                       | LOC246120                                   | 0.6 | 0.000855454 | 0.009411711 |
| 1371635_at   | G protein-coupled receptor 175                                                                            | Gpr175                                      | 0.7 | 0.000858092 | 0.009434419 |
| 1394252_at   | sparc/osteonectin, cwcv and kazal-like domains proteoglycan 3 (predicted)                                 | Spock3_predicted                            | 0.5 | 0.000858868 | 0.009436646 |
| 1392137_at   | Transcribed locus                                                                                         | ---                                         | 0.6 | 0.000862218 | 0.009463654 |
| 1371570_at   | scratch homolog 1, zinc finger protein (Drosophila) (predicted)                                           | Scr1_predicted                              | 0.3 | 0.000863186 | 0.009463654 |
| 1377473_at   | SWI/SNF related, matrix associated, actin dependent regulator of chromatin, subfamily d, member 3         | Smarcd3                                     | 0.7 | 0.000867747 | 0.009489829 |
| 1387130_at   | solute carrier family 39 (iron-regulated transporter), member 1                                           | Slc40a1                                     | 0.6 | 0.000871336 | 0.009508976 |
| 1389429_at   | ---                                                                                                       | ---                                         | 0.7 | 0.000875713 | 0.00953889  |
| 1393470_at   | ---                                                                                                       | ---                                         | 0.5 | 0.000879666 | 0.009575612 |
| 1385343_at   | ---                                                                                                       | ---                                         | 0.5 | 0.000894945 | 0.009708254 |
| 1390672_at   | candidate mediator of the p53-dependent G2 arrest                                                         | Rprm                                        | 0.4 | 0.000896132 | 0.009709867 |
| 1375941_at   | BAI1-associated protein 2-like 1                                                                          | Baiap2l1                                    | 0.5 | 0.000901889 | 0.009755149 |
| 1392877_at   | ---                                                                                                       | ---                                         | 0.6 | 0.000905909 | 0.009777159 |
| 1372802_at   | similar to mKIAA1805 protein (predicted)                                                                  | RGD1561526_pre<br>dicted                    | 0.7 | 0.000907136 | 0.009777575 |
| 1374835_at   | RAB-interacting factor                                                                                    | Rabif                                       | 0.6 | 0.000921608 | 0.009907591 |
| 1377738_a_at | cysteine and histidine rich 1                                                                             | Cyhr1                                       | 0.6 | 0.000923254 | 0.009913539 |
| 1367585_a_at | ATPase, Na <sup>+</sup> /K <sup>+</sup> transporting, alpha 1 polypeptide                                 | Atp1a1                                      | 0.3 | 0.000923367 | 0.009913539 |
| 1379953_at   | similar to T-cell activation protein phosphatase 2C (predicted)                                           | RGD1310383_pre<br>dicted                    | 0.4 | 0.000933159 | 0.009973095 |
| 1394110_at   | Transcribed locus                                                                                         | ---                                         | 0.6 | 0.000943999 | 0.010056281 |
| 1368401_at   | glutamate receptor, ionotropic, AMPA2                                                                     | Gria2                                       | 0.4 | 0.000948453 | 0.010090655 |
| 1392529_at   | Transcribed locus                                                                                         | ---                                         | 0.7 | 0.000950648 | 0.010107474 |
| 1398352_at   | protein inhibitor of activated STAT, 4                                                                    | Pias4                                       | 0.3 | 0.000957502 | 0.010160639 |
| 1390292_at   | transmembrane protein 8 (five membrane-spanning domains) (predicted)                                      | Tmem8_predicted<br>RGD1566149_pre<br>dicted | 0.6 | 0.00096357  | 0.010205275 |
| 1382029_at   | similar to CDNA sequence BC017647 (predicted)                                                             | ---                                         | 0.7 | 0.000965587 | 0.010210808 |
| 1389774_at   | Transcribed locus                                                                                         | ---                                         | 0.5 | 0.000968861 | 0.010229273 |
| 1385744_at   | similar to KIAA1679 protein (predicted)                                                                   | RGD1306938_pre<br>dicted                    | 0.4 | 0.000972227 | 0.010252455 |
| 1388151_at   | coronin 7                                                                                                 | Coro7                                       | 0.7 | 0.00097256  | 0.010252455 |
| 1383699_at   | Ras-like without CAAX 2                                                                                   | Rit2                                        | 0.4 | 0.000975506 | 0.010272163 |
| 1371393_at   | calsyntenin 1                                                                                             | Clstn1                                      | 0.7 | 0.000979911 | 0.010307492 |
| 1375341_at   | Kua homolog (predicted)                                                                                   | Kua_predicted                               | 0.6 | 0.000980301 | 0.010307492 |
| 1388718_at   | tropomodulin 1                                                                                            | Tmod1                                       | 0.6 | 0.000980741 | 0.010307492 |
| 1387194_at   | centaurin, alpha 1                                                                                        | Centa1                                      | 0.6 | 0.000989197 | 0.010383096 |
| 1372658_at   | desmuslin                                                                                                 | Dmn                                         | 0.5 | 0.000993546 | 0.010415453 |
| 1387133_at   | calbindin 2                                                                                               | Calb2                                       | 0.4 | 0.000997101 | 0.010439415 |
| 1389613_at   | Transcribed locus                                                                                         | ---                                         | 0.5 | 0.001011111 | 0.01055251  |
| 1379022_at   | a disintegrin-like and metallopeptidase (reprolysin type) with thrombospondin type 1 motif, 8 (predicted) | Adamts8_predicte<br>d                       | 0.5 | 0.001016074 | 0.010587682 |
| 1370576_at   | dynein cytoplasmic 1 light intermediate chain 1                                                           | Dync1li1                                    | 0.4 | 0.001016412 | 0.010587682 |
| 1395357_at   | microtubule-associated protein 1b                                                                         | Map1b                                       | 0.3 | 0.001017275 | 0.010589967 |
| 1370205_at   | solute carrier organic anion transporter family, member 1c1                                               | Slco1c1                                     | 0.4 | 0.001022642 | 0.010623617 |
| 1368505_at   | regulator of G-protein signaling 4                                                                        | Rgs4                                        | 0.4 | 0.001023028 | 0.010623617 |
| 1368701_at   | ATPase, Na <sup>+</sup> /K <sup>+</sup> transporting, alpha 3 polypeptide                                 | Atp1a3                                      | 0.4 | 0.00102321  | 0.010623617 |
| 1395827_at   | Transcribed locus                                                                                         | ---                                         | 0.5 | 0.001023258 | 0.010623617 |
| 1385442_at   | Transcribed locus                                                                                         | ---                                         | 0.6 | 0.001025845 | 0.010633664 |
| 1378091_at   | Transcribed locus                                                                                         | ---                                         | 0.6 | 0.001028233 | 0.010633707 |
| 1378298_at   | hypothetical LOC298591 (predicted) /// similar to immunoglobulin superfamily, member 21                   | LOC684776 ///<br>RGD1310117_pre<br>dicted   | 0.6 | 0.001028325 | 0.010633707 |



|              |                                                                                                             |                            |     |             |             |
|--------------|-------------------------------------------------------------------------------------------------------------|----------------------------|-----|-------------|-------------|
| 1369043_at   | potassium voltage-gated channel, shaker-related subfamily, member 4                                         | Kcna4                      | 0.3 | 0.001041827 | 0.010702468 |
| 1397619_at   | Transcribed locus                                                                                           | ---                        | 0.6 | 0.001042765 | 0.010702468 |
| 1373909_at   | similar to transmembrane protein 64                                                                         | LOC679161                  | 0.6 | 0.001043048 | 0.010702468 |
| 1393163_at   | ---                                                                                                         | ---                        | 0.5 | 0.00104789  | 0.010732062 |
| 1374300_at   | ectonucleoside triphosphate diphosphohydrolase 4 (predicted)                                                | Entpd4_predicted           | 0.4 | 0.001049057 | 0.010737331 |
| 1369681_at   | ISL1 transcription factor, LIM/homeodomain 1                                                                | Isl1                       | 0.4 | 0.001051136 | 0.010751919 |
| 1372779_at   | UDP-GlcNAc:betaGal beta-1,3-N-acetylglucosaminyltransferase 1 (predicted)                                   | B3gnt1_predicted           | 0.5 | 0.001057617 | 0.010789283 |
| 1383180_at   | protein phosphatase 1, regulatory (inhibitor) subunit 2                                                     | Ppp1r2                     | 0.4 | 0.001057844 | 0.010789283 |
| 1373622_at   | hypothetical protein LOC502414                                                                              | LOC502414                  | 0.7 | 0.001058069 | 0.010789283 |
| 1378685_at   | hypothetical protein LOC689836                                                                              | LOC689836                  | 0.7 | 0.00106257  | 0.010821761 |
| 1383511_at   | Transcribed locus                                                                                           | ---                        | 0.6 | 0.001065405 | 0.010826474 |
| 1389364_at   | Nedd4 family interacting protein 2 (predicted)                                                              | Ndfip2_predicted           | 0.4 | 0.001066446 | 0.010826474 |
| 1398613_at   | Transcribed locus                                                                                           | ---                        | 0.4 | 0.001066982 | 0.010826474 |
| 1371731_at   | Mesoderm specific transcript                                                                                | Mest                       | 0.5 | 0.001067832 | 0.010828418 |
| 1370455_a_at | olfactomedin 3                                                                                              | Olfm3                      | 0.6 | 0.001070907 | 0.010846233 |
| 1396676_at   | Transcribed locus                                                                                           | ---                        | 0.4 | 0.001072723 | 0.010857938 |
| 1371162_at   | nuclear receptor MrgA10 RF-amide G protein-coupled receptor                                                 | Mrga10                     | 0.4 | 0.001075099 | 0.010871145 |
| 1374737_at   | similar to tRNA-splicing endonuclease subunit Sen54 (tRNA-intron endonuclease Sen54)                        | LOC688263 ///<br>LOC690308 | 0.6 | 0.001076011 | 0.010871145 |
| 1388756_at   | phosphopantothenoylcysteine synthetase                                                                      | Ppcs                       | 0.5 | 0.001081993 | 0.010924872 |
| 1371112_at   | ret proto-oncogene                                                                                          | Ret                        | 0.4 | 0.00108302  | 0.010928531 |
| 1387971_a_at | mitogen activated protein kinase 8 interacting protein                                                      | Mapk8ip                    | 0.5 | 0.001085302 | 0.010937702 |
| 1370775_a_at | calcitonin/calcitonin-related polypeptide, alpha                                                            | Calca                      | 0.4 | 0.001085385 | 0.010937702 |
| 1388540_at   | ---                                                                                                         | ---                        | 0.6 | 0.001094077 | 0.010998666 |
| 1374904_at   | sine oculis homeobox homolog 1 (Drosophila)                                                                 | Six1                       | 0.6 | 0.001094651 | 0.010998666 |
| 1384305_at   | solute carrier family 45, member 1                                                                          | Slc45a1                    | 0.7 | 0.001098819 | 0.011027078 |
| 1390385_at   | similar to D-glucuronyl C5-epimerase (predicted)                                                            | RGD1565253_pre<br>dicted   | 0.6 | 0.001101188 | 0.011037375 |
| 1384187_at   | adaptor-related protein complex 1, sigma 2 subunit (predicted)                                              | Ap1s2_predicted            | 0.4 | 0.001103626 | 0.01105508  |
| 1382212_at   | Transcribed locus                                                                                           | ---                        | 0.7 | 0.001111073 | 0.011100285 |
| 1397241_at   | similar to hypothetical protein MGC47816 (predicted)                                                        | RGD1306880_pre<br>dicted   | 0.2 | 0.001112807 | 0.011102756 |
| 1382226_at   | Similar to RNA binding motif, single stranded interacting protein 3 isoform 1                               | LOC680726                  | 0.5 | 0.001120499 | 0.011156156 |
| 1382670_at   | La ribonucleoprotein domain family, member 1 (predicted)                                                    | Larp1_predicted            | 0.4 | 0.001128974 | 0.011226944 |
| 1383457_at   | Similar to hypothetical protein DKFZp761N1114 (predicted)                                                   | RGD1566090_pre<br>dicted   | 0.6 | 0.001129763 | 0.011227998 |
| 1369410_at   | ---                                                                                                         | ---                        | 0.5 | 0.001151904 | 0.011420447 |
| 1381445_at   | Estrogen-related receptor gamma                                                                             | Esrrg                      | 0.4 | 0.001158907 | 0.011476036 |
| 1383546_at   | glycerophosphodiester phosphodiesterase domain containing 2 (predicted)                                     | Gdpd2_predicted            | 0.6 | 0.001160774 | 0.011487611 |
| 1391028_at   | Similar to nuclear receptor interacting protein 2                                                           | LOC689619                  | 0.4 | 0.001162023 | 0.01149306  |
| 1392987_at   | similar to hypothetical protein (predicted)                                                                 | RGD1561605_pre<br>dicted   | 0.6 | 0.001166896 | 0.011527387 |
| 1391434_at   | RAB3A, member RAS oncogene family                                                                           | Rab3a                      | 0.6 | 0.001173712 | 0.011566938 |
| 1385589_at   | similar to CG10806-PB, isoform B                                                                            | LOC679958 ///<br>LOC686829 | 0.7 | 0.001174675 | 0.011569492 |
| 1389597_at   | piggyBac transposable element derived 5 (predicted)                                                         | Pgbd5_predicted            | 0.6 | 0.001178001 | 0.011581449 |
| 1375861_at   | similar to nucleosome assembly protein 1-like 5                                                             | LOC682844 ///<br>MGC105733 | 0.6 | 0.001180968 | 0.011594924 |
| 1370406_a_at | decay accelerating factor 1                                                                                 | Daf1                       | 0.3 | 0.001185475 | 0.011623574 |
| 1377001_at   | neuron-glia-CAM-related cell adhesion molecule phosphatidylinositol transfer protein, membrane-associated 1 | Nrcam                      | 0.6 | 0.001185819 | 0.011623574 |
| 1389347_at   | Staufen, RNA binding protein, homolog 2 (Drosophila)                                                        | Pitpnm1                    | 0.7 | 0.001195144 | 0.011701033 |
| 1379754_at   | ---                                                                                                         | ---                        | 0.6 | 0.001199326 | 0.011728008 |
| 1390581_at   | ---                                                                                                         | ---                        | 0.5 | 0.001204399 | 0.011763629 |
| 1379750_at   | roundabout homolog 2 (Drosophila)                                                                           | Robo2                      | 0.6 | 0.001206285 | 0.011769264 |

|            |                                                                                                                                                    |                                  |     |             |             |
|------------|----------------------------------------------------------------------------------------------------------------------------------------------------|----------------------------------|-----|-------------|-------------|
| 1396025_at | G protein-coupled receptor 61 (predicted)                                                                                                          | Gpr61_predicted                  | 0.6 | 0.001209465 | 0.011778151 |
| 1379894_at | similar to 3632451O06Rik protein (predicted)                                                                                                       | RGD1310110_pre<br>dicted         | 0.5 | 0.001209716 | 0.011778151 |
| 1386929_at | hexokinase 1                                                                                                                                       | Hk1                              | 0.5 | 0.001214318 | 0.011797498 |
| 1395673_at | Transcribed locus                                                                                                                                  | ---                              | 0.5 | 0.001214322 | 0.011797498 |
| 1382920_at | leucine-rich repeat-containing 8                                                                                                                   | Lrrc8                            | 0.7 | 0.001215371 | 0.011800719 |
| 1374841_at | ---                                                                                                                                                | ---                              | 0.5 | 0.001216782 | 0.011807452 |
| 1368242_at | potassium voltage gated channel, Shab-related subfamily, member 1                                                                                  | Kcnb1                            | 0.6 | 0.001221345 | 0.011844743 |
| 1391948_at | B-cell leukemia/lymphoma 11B (predicted)                                                                                                           | Bcl11b_predicted                 | 0.6 | 0.001224964 | 0.011862932 |
| 1371531_at | similar to mammalian retrotransposon derived 8b                                                                                                    | LOC678880                        | 0.7 | 0.001228616 | 0.011872927 |
| 1387998_at | exocyst complex component 8                                                                                                                        | Exoc8                            | 0.4 | 0.001231757 | 0.011889638 |
| 1378987_at | Similar to CG18769-PB, isoform B                                                                                                                   | LOC294560                        | 0.5 | 0.001233121 | 0.0118958   |
| 1398189_at | Transcribed locus                                                                                                                                  | ---                              | 0.4 | 0.001233842 | 0.0118958   |
| 1395739_at | similar to RIKEN cDNA C920006C10 (predicted)                                                                                                       | RGD1305976_pre<br>dicted         | 0.6 | 0.001235568 | 0.011898489 |
| 1373510_at | vesicle-associated membrane protein 1                                                                                                              | Vamp1                            | 0.4 | 0.001247817 | 0.011994706 |
| 1372848_at | Transcribed locus                                                                                                                                  | ---                              | 0.4 | 0.001248476 | 0.011994706 |
| 1370351_at | tudor domain containing 7                                                                                                                          | Tdrd7                            | 0.7 | 0.001250683 | 0.012001889 |
| 1373167_at | Transcribed locus                                                                                                                                  | ---                              | 0.6 | 0.001251673 | 0.012003577 |
| 1378320_at | Transcribed locus                                                                                                                                  | ---                              | 0.7 | 0.001255267 | 0.01200912  |
| 1367963_at | G protein beta subunit-like                                                                                                                        | Gbl                              | 0.7 | 0.001255817 | 0.01200912  |
| 1378876_at | Transcribed locus                                                                                                                                  | ---                              | 0.3 | 0.00126624  | 0.012081474 |
| 1372561_at | stromal membrane-associated protein 1-like                                                                                                         | Smap1l                           | 0.6 | 0.001272277 | 0.012131252 |
| 1370059_at | neurofilament, light polypeptide                                                                                                                   | Nefl                             | 0.5 | 0.001277781 | 0.012162579 |
| 1382325_at | glycine C-acetyltransferase (2-amino-3-ketobutyrate-coenzyme A ligase)                                                                             | Gcat                             | 0.6 | 0.001285875 | 0.012225477 |
| 1371359_at | myeloid leukemia factor 2 (predicted)                                                                                                              | Mlf2_predicted                   | 0.5 | 0.001289225 | 0.012243167 |
| 1379405_at | glucocorticoid receptor DNA binding factor 1 (predicted) /// similar to Glucocorticoid receptor DNA-binding factor 1 (GAP-associated protein p190) | Grff1_predicted ///<br>LOC686520 | 0.6 | 0.001302187 | 0.012344879 |
| 1376416_at | similar to KIAA1882 protein                                                                                                                        | RGD1309461                       | 0.5 | 0.001305739 | 0.0123643   |
| 1395718_at | Transcribed locus                                                                                                                                  | ---                              | 0.7 | 0.001317664 | 0.012470042 |
| 1376501_at | Rho GTPase activating protein 8                                                                                                                    | Arhgap8                          | 0.6 | 0.00132216  | 0.012478539 |
| 1373301_at | protein phosphatase 1, regulatory (inhibitor) subunit 13B (predicted)                                                                              | Ppp1r13b_predict<br>ed           | 0.6 | 0.001322837 | 0.012478539 |
| 1380625_at | CCR4-NOT transcription complex, subunit 4                                                                                                          | Cnot4                            | 0.7 | 0.001323723 | 0.012478539 |
| 1394894_at | WD repeat domain 37 (predicted)                                                                                                                    | Wdr37_predicted                  | 0.6 | 0.001323872 | 0.012478539 |
| 1372288_at | similar to D11Bwg0280e protein                                                                                                                     | RGD1309256                       | 0.7 | 0.001337044 | 0.012566682 |
| 1380561_at | isoleucine-tRNA synthetase 2, mitochondrial (predicted)                                                                                            | lars2_predicted                  | 0.5 | 0.00134595  | 0.012635952 |
| 1383362_at | Transcribed locus                                                                                                                                  | ---                              | 0.7 | 0.001355073 | 0.012707095 |
| 1394883_at | Transcribed locus                                                                                                                                  | ---                              | 0.5 | 0.00135619  | 0.012710321 |
| 1396603_at | Transcribed locus                                                                                                                                  | ---                              | 0.5 | 0.001357014 | 0.012710799 |
| 1385954_at | Transcribed locus                                                                                                                                  | ---                              | 0.6 | 0.001358152 | 0.012714221 |
| 1387961_at | opioid binding protein/cell adhesion molecule-like                                                                                                 | Opcml                            | 0.5 | 0.001359155 | 0.012715638 |
| 1367882_at | microtubule-associated protein 1 A                                                                                                                 | Mtap1a                           | 0.6 | 0.001359913 | 0.012715638 |
| 1385364_at | Transcribed locus                                                                                                                                  | ---                              | 0.5 | 0.001367459 | 0.012748378 |
| 1395792_at | Poly(rC) binding protein 2                                                                                                                         | Pcbp2                            | 0.6 | 0.001372003 | 0.012748378 |
| 1372091_at | MID1 interacting G12-like protein                                                                                                                  | Mig12                            | 0.5 | 0.001372042 | 0.012748378 |
| 1398295_at | solute carrier family 29 (nucleoside transporters), member 1                                                                                       | Slc29a1                          | 0.6 | 0.001386337 | 0.012826724 |
| 1394973_at | Phosphodiesterase 1C                                                                                                                               | Pde1c                            | 0.6 | 0.001387953 | 0.012826724 |
| 1386953_at | hydroxysteroid 11-beta dehydrogenase 1                                                                                                             | Hsd11b1                          | 0.6 | 0.001396726 | 0.012877437 |
| 1391601_at | leucine rich repeat protein 2, neuronal (predicted)                                                                                                | Lrrn2_predicted                  | 0.7 | 0.00140278  | 0.012904323 |
| 1395947_at | Transcribed locus                                                                                                                                  | ---                              | 0.6 | 0.00140407  | 0.01290897  |
| 1390393_at | Transcribed locus                                                                                                                                  | ---                              | 0.6 | 0.001406652 | 0.012923912 |
| 1367499_at | solute carrier family 35, member C1 (predicted)                                                                                                    | Slc35c1_predicted                | 0.7 | 0.001414986 | 0.012971904 |
| 1394627_at | Sorting nexin 19 (predicted)                                                                                                                       | Snx19_predicted                  | 0.6 | 0.001415422 | 0.012971904 |
| 1394448_at | Transcribed locus                                                                                                                                  | ---                              | 0.7 | 0.001415647 | 0.012971904 |
| 1385184_at | Bwk1 leukemia-related gene                                                                                                                         | Bwk1                             | 0.7 | 0.001417639 | 0.012975695 |
| 1379899_at | Glycosyltransferase 25 domain containing 2 (predicted)                                                                                             | Glit25d2_predicted               | 0.5 | 0.001419238 | 0.012975993 |
| 1369690_at | N-ethylmaleimide sensitive fusion protein                                                                                                          | Nsf                              | 0.5 | 0.001431969 | 0.013063244 |

|            |                                                                               |                          |     |             |             |
|------------|-------------------------------------------------------------------------------|--------------------------|-----|-------------|-------------|
| 1387235_at | chromogranin A                                                                | Chga                     | 0.4 | 0.00144111  | 0.013139346 |
| 1391405_at | similar to mKIAA0960 protein (predicted)                                      | RGD1566201_pre<br>dicted | 0.6 | 0.001445359 | 0.013158248 |
| 1377621_at | Transcribed locus                                                             | ---                      | 0.7 | 0.001448031 | 0.013165959 |
| 1370568_at | adrenergic receptor, alpha 2c                                                 | Adra2c                   | 0.4 | 0.00145006  | 0.013169841 |
| 1393250_at | ---                                                                           | ---                      | 0.6 | 0.001451493 | 0.01317486  |
| 1370214_at | parvalbumin                                                                   | Pvalb                    | 0.3 | 0.001452214 | 0.01317486  |
| 1382846_at | Transcribed locus                                                             | ---                      | 0.6 | 0.001453694 | 0.013181012 |
| 1368182_at | acyl-CoA synthetase long-chain family member 6                                | Acsl6                    | 0.4 | 0.001455905 | 0.013186526 |
| 1377007_at | Transcribed locus                                                             | ---                      | 0.6 | 0.001457579 | 0.013194418 |
| 1370818_at | 2-4-dienoyl-Coenzyme A reductase 2,<br>peroxisomal                            | Decr2                    | 0.6 | 0.001459786 | 0.013206469 |
| 1388000_at | solute carrier family 24<br>(sodium/potassium/calcium exchanger), member<br>2 | Slc24a2                  | 0.3 | 0.001460516 | 0.013206469 |
| 1399059_at | enhancer of zeste homolog 1 (Drosophila)<br>(predicted)                       | Ezh1_predicted           | 0.6 | 0.001461383 | 0.013207045 |
| 1374019_at | RGD1564379 (predicted)                                                        | RGD1564379_pre<br>dicted | 0.6 | 0.001467927 | 0.013237097 |
| 1377366_at | Transcribed locus                                                             | ---                      | 0.6 | 0.001474016 | 0.013270178 |
| 1393141_at | Aspartate-beta-hydroxylase (predicted)                                        | Asph_predicted           | 0.6 | 0.001487078 | 0.013350227 |
| 1373654_at | annexin A8                                                                    | Anxa8                    | 0.4 | 0.001488639 | 0.013350227 |
| 1387042_at | calcium channel, voltage-dependent, beta 3<br>subunit                         | Cacnb3                   | 0.5 | 0.001489401 | 0.013350227 |
| 1388821_at | similar to Tribbles homolog 2 (predicted)                                     | RGD1564451_pre<br>dicted | 0.6 | 0.001491317 | 0.013360125 |
| 1374630_at | chloride intracellular channel 3                                              | Clic3                    | 0.6 | 0.001493542 | 0.013370578 |
| 1396034_at | carboxylesterase 615                                                          | LOC307660                | 0.4 | 0.001500969 | 0.013417359 |
| 1380859_at | Transcribed locus                                                             | ---                      | 0.5 | 0.001510037 | 0.013476442 |
| 1381871_at | Transcribed locus                                                             | ---                      | 0.6 | 0.00152156  | 0.013561498 |
| 1376424_at | Transcribed locus                                                             | ---                      | 0.7 | 0.001524087 | 0.013562281 |
| 1383254_at | ---                                                                           | ---                      | 0.5 | 0.001536926 | 0.01365714  |
| 1368148_at | nerve growth factor receptor (TNFR superfamily,<br>member 16)                 | Ngfr                     | 0.4 | 0.001546826 | 0.013727024 |
| 1369972_at | serine (or cysteine) peptidase inhibitor, clade B,<br>member 5                | Serpib5                  | 0.6 | 0.001551471 | 0.013750756 |
| 1374532_at | prostaglandin E synthase 2 (predicted)                                        | Ptges2_predicted         | 0.6 | 0.001552499 | 0.013750756 |
| 1393066_at | Cadherin 1                                                                    | Cdh1                     | 0.7 | 0.001552509 | 0.013750756 |
| 1375873_at | Transcribed locus                                                             | ---                      | 0.7 | 0.001553314 | 0.013750756 |
| 1388927_at | RAB, member of RAS oncogene family-like 4<br>(predicted)                      | Rab14_predicted          | 0.7 | 0.001558126 | 0.013778521 |
| 1393037_at | Transcribed locus                                                             | ---                      | 0.7 | 0.001563314 | 0.013809555 |
| 1367773_at | solute carrier family 25, member 1                                            | Slc25a1                  | 0.6 | 0.001577174 | 0.013909579 |
| 1394821_at | Transcribed locus                                                             | ---                      | 0.4 | 0.001588458 | 0.013989624 |
| 1393171_at | Transcribed locus                                                             | ---                      | 0.5 | 0.001588648 | 0.013989624 |
| 1388624_at | similar to Hypothetical UPF0184 protein C9orf16<br>homolog (predicted)        | RGD1561113_pre<br>dicted | 0.5 | 0.00159091  | 0.013989624 |
| 1367707_at | fatty acid synthase                                                           | Fasn                     | 0.5 | 0.001593636 | 0.013989624 |
| 1391437_at | similar to BC002216 protein                                                   | MGC94339                 | 0.5 | 0.001594507 | 0.013989624 |
| 1389787_at | PTK7 protein tyrosine kinase 7 (predicted)                                    | Ptk7_predicted           | 0.6 | 0.001598134 | 0.014011782 |
| 1389844_at | FK506 binding protein 4                                                       | Fkbp4                    | 0.3 | 0.001603354 | 0.014031712 |
| 1382567_at | ---                                                                           | ---                      | 0.5 | 0.001607712 | 0.014058291 |
| 1368627_at | regucalcin                                                                    | Rgn                      | 0.5 | 0.001611421 | 0.014083235 |
| 1388644_at | ---                                                                           | ---                      | 0.7 | 0.001612774 | 0.01408758  |
| 1374593_at | protein kinase C, epsilon                                                     | Prkce                    | 0.5 | 0.001620321 | 0.014145991 |
| 1368853_at | visinin-like 1                                                                | Vsnl1                    | 0.3 | 0.001624669 | 0.014162022 |
| 1388034_at | kinesin family member 1B                                                      | Kif1b                    | 0.5 | 0.001624741 | 0.014162022 |
| 1374559_at | ring finger protein 26 (predicted)                                            | Rnf26_predicted          | 0.7 | 0.001627879 | 0.014181861 |
| 1390077_at | Translocation associated membrane protein 1                                   | Tram1                    | 0.4 | 0.001641708 | 0.014279649 |
| 1390863_at | solute carrier family 19 (thiamine transporter),<br>member 2                  | Slc19a2                  | 0.6 | 0.001645799 | 0.014306157 |
| 1396246_at | Transcribed locus                                                             | ---                      | 0.7 | 0.001646559 | 0.014306157 |
| 1387058_at | phosphatidylcholine transfer protein                                          | Pctp                     | 0.5 | 0.001647865 | 0.014306157 |
| 1383298_at | LOC363015 (predicted)                                                         | RGD1310444_pre<br>dicted | 0.6 | 0.001648235 | 0.014306157 |
| 1389032_at | mucolin 1 (predicted)                                                         | Mcoln1_predicted         | 0.6 | 0.001651015 | 0.014315181 |

|              |                                                                       |                         |     |             |             |
|--------------|-----------------------------------------------------------------------|-------------------------|-----|-------------|-------------|
| 1369993_at   | calcium/calmodulin-dependent protein kinase II gamma                  | Camk2g                  | 0.5 | 0.001653975 | 0.014333284 |
| 1375307_at   | chromobox homolog 6                                                   | Cbx6                    | 0.5 | 0.001657403 | 0.014355429 |
| 1398593_at   | similar to RIKEN cDNA 2310003M01                                      | LOC298139               | 0.6 | 0.001662112 | 0.014388637 |
| 1367726_at   | thyroid hormone receptor alpha                                        | Thra                    | 0.6 | 0.001667977 | 0.014431818 |
| 1394517_at   | CDNA clone IMAGE:7103416                                              | ---                     | 0.5 | 0.00166932  | 0.014435843 |
| 1376669_at   | Transcribed locus                                                     | ---                     | 0.6 | 0.001671477 | 0.014438933 |
| 1392501_at   | Transcribed locus                                                     | ---                     | 0.7 | 0.001672311 | 0.014438933 |
| 1373938_at   | WD repeat domain 24                                                   | Wdr24                   | 0.7 | 0.001684184 | 0.014492598 |
| 1393699_at   | Transcribed locus                                                     | ---                     | 0.5 | 0.001685575 | 0.014492598 |
| 1368700_at   | phospholipase C-like 1                                                | Plcl1                   | 0.6 | 0.001692715 | 0.014533875 |
| 1397571_at   | Cancer susceptibility candidate 3                                     | Casc3                   | 0.5 | 0.001699364 | 0.014558327 |
| 1386310_at   | Transcribed locus                                                     | ---                     | 0.3 | 0.001700491 | 0.014559957 |
| 1395637_at   | aspartate beta-hydroxylase domain containing 2                        | Asphd2                  | 0.6 | 0.00171132  | 0.014614638 |
| 1375212_at   | ankyrin repeat domain 52 (predicted)                                  | Ankrd52_predicted       | 0.6 | 0.001724583 | 0.014697377 |
| 1390566_a_at | creatine kinase, mitochondrial 1, ubiquitous                          | Ckmt1                   | 0.3 | 0.001731793 | 0.014735915 |
| 1373896_at   | synaptotagmin I                                                       | Syt1                    | 0.6 | 0.001733319 | 0.014741281 |
| 1389447_at   | similar to prolyl-4-hydroxylase-alpha NE2 CG9720-PA (predicted)       | RGD1311848_predicted    | 0.7 | 0.001740387 | 0.014780346 |
| 1386379_at   | Transcribed locus                                                     | ---                     | 0.5 | 0.001743166 | 0.014780346 |
| 1389274_at   | dephospho-CoA kinase domain containing                                | Dcakd                   | 0.7 | 0.001753949 | 0.014847636 |
| 1375647_at   | Transcribed locus                                                     | ---                     | 0.6 | 0.00176586  | 0.014925419 |
| 1368261_at   | neurexin 3                                                            | Nrxn3                   | 0.6 | 0.001775994 | 0.014980285 |
| 1393547_at   | similar to hypothetical protein C630023L15 (predicted)                | RGD1560399_predicted    | 0.4 | 0.001778199 | 0.014991192 |
| 1393614_at   | ---                                                                   | ---                     | 0.5 | 0.001783443 | 0.015020007 |
| 1397579_x_at | Transcribed locus                                                     | ---                     | 0.6 | 0.00178506  | 0.015025934 |
| 1393961_at   | Transcribed locus                                                     | ---                     | 0.7 | 0.001802225 | 0.015120853 |
| 1375048_at   | ---                                                                   | ---                     | 0.7 | 0.001802772 | 0.015120853 |
| 1388522_at   | similar to T-cell activation protein phosphatase 2C (predicted)       | RGD1310383_predicted    | 0.7 | 0.001807197 | 0.015147273 |
| 1376788_at   | death associated protein kinase 1 (predicted)                         | Dapk1_predicted         | 0.6 | 0.001822105 | 0.015236394 |
| 1385924_at   | Transcribed locus                                                     | ---                     | 0.5 | 0.001830737 | 0.015254283 |
| 1374934_at   | Transcribed locus                                                     | ---                     | 0.5 | 0.001841755 | 0.01533832  |
| 1384156_at   | oxysterol binding protein-like 7 (predicted)                          | Osbp17_predicted        | 0.7 | 0.001847267 | 0.015361988 |
| 1376583_at   | ---                                                                   | ---                     | 0.6 | 0.001847399 | 0.015361988 |
| 1374414_at   | similar to RIKEN cDNA 1300010M03                                      | RGD1306844              | 0.7 | 0.001859541 | 0.015443038 |
| 1385219_a_at | ---                                                                   | ---                     | 0.4 | 0.001869618 | 0.015501603 |
| 1374899_at   | similar to hypothetical protein MGC20579 (predicted)                  | RGD1566042_predicted    | 0.4 | 0.001869843 | 0.015501603 |
| 1382234_at   | Hypothetical protein LOC311254                                        | LOC311254               | 0.7 | 0.00187529  | 0.015528128 |
| 1378130_at   | ---                                                                   | ---                     | 0.5 | 0.001876718 | 0.015528128 |
| 1387456_at   | stauferin, RNA binding protein, homolog 2 (Drosophila)                | Stau2                   | 0.4 | 0.001894648 | 0.015643039 |
| 1395429_at   | Cholinergic receptor, nicotinic, alpha polypeptide 7                  | Chrna7                  | 0.5 | 0.001901316 | 0.015683473 |
| 1377598_at   | ---                                                                   | ---                     | 0.5 | 0.001913386 | 0.015772205 |
| 1387878_at   | glutamate dehydrogenase 1                                             | Glud1                   | 0.4 | 0.001924665 | 0.015836363 |
| 1397665_at   | Transcribed locus                                                     | ---                     | 0.6 | 0.001940199 | 0.015932299 |
| 1385935_at   | Transcribed locus                                                     | ---                     | 0.7 | 0.001941831 | 0.015932991 |
| 1381526_at   | par-6 (partitioning defective 6,) homolog alpha (C. elegans)          | Pard6a                  | 0.8 | 0.001942342 | 0.015932991 |
| 1393559_at   | Stanniocalcin 1                                                       | Stc1                    | 0.5 | 0.001946865 | 0.015955173 |
| 1370625_at   | Fas apoptotic inhibitory molecule 2                                   | Faim2                   | 0.2 | 0.001951619 | 0.015970267 |
| 1376924_a_at | palmdelphin                                                           | Palmd                   | 0.7 | 0.001957829 | 0.015988765 |
| 1370887_at   | transforming growth factor beta 1 induced transcript 1                | Tgfb1i1                 | 0.7 | 0.001958164 | 0.015988765 |
| 1389955_at   | Adaptor-related protein complex 1, sigma 2 subunit (predicted)        | Ap1s2_predicted         | 0.6 | 0.00195874  | 0.015988765 |
| 1380681_at   | similar to ring finger protein 180 /// hypothetical protein LOC685384 | LOC683640 /// LOC685384 | 0.6 | 0.00196608  | 0.016024817 |
| 1373666_at   | Rap guanine nucleotide exchange factor (GEF) 5                        | Rapgef5                 | 0.6 | 0.001972024 | 0.016057348 |
| 1370812_at   | Bcl2-like 1                                                           | Bcl2l1                  | 0.7 | 0.001977244 | 0.016091889 |
| 1380799_at   | Transcribed locus                                                     | ---                     | 0.4 | 0.001978592 | 0.016094895 |
| 1371993_at   | Copine III (predicted)                                                | Cpne3_predicted         | 0.6 | 0.001986188 | 0.016142781 |
| 1389008_at   | Sprouty-related, EVH1 domain containing 2                             | Spred2                  | 0.4 | 0.001987971 | 0.016143461 |

|              |                                                                                                                   |                                           |     |             |             |
|--------------|-------------------------------------------------------------------------------------------------------------------|-------------------------------------------|-----|-------------|-------------|
| 1380028_at   | similar to ADP-ribosylation factor-like protein 4C (ADP-ribosylation factor-like 7)                               | LOC367311                                 | 0.7 | 0.001996421 | 0.016199871 |
| 1397632_at   | SLIT and NTRK-like family, member 1 (predicted)                                                                   | Slitrk1_predicted                         | 0.6 | 0.002000279 | 0.016220971 |
| 1391097_at   | ---                                                                                                               | ---                                       | 0.6 | 0.00200389  | 0.016236445 |
| 1377197_at   | Transcribed locus                                                                                                 | ---                                       | 0.6 | 0.002005824 | 0.016239676 |
| 1368854_at   | visinin-like 1                                                                                                    | Vsnl1                                     | 0.4 | 0.002006263 | 0.016239676 |
| 1372408_at   | golgi associated, gamma adaptin ear containing, ARF binding protein 2                                             | Gga2                                      | 0.4 | 0.002011424 | 0.016273441 |
| 1394986_at   | Similar to KIAA1838 protein (predicted)                                                                           | RGD1310304_pre<br>dicted                  | 0.5 | 0.002014249 | 0.016277518 |
| 1372528_at   | N-ethylmaleimide sensitive fusion protein                                                                         | Nsf                                       | 0.5 | 0.002014897 | 0.016277518 |
| 1381457_at   | Transcribed locus                                                                                                 | ---                                       | 0.6 | 0.002027342 | 0.016353956 |
| 1386149_at   | ---                                                                                                               | ---                                       | 0.6 | 0.002042353 | 0.016442795 |
| 1374087_at   | ---                                                                                                               | ---                                       | 0.7 | 0.002045398 | 0.016443272 |
| 1378665_at   | Protocadherin 9 (predicted)                                                                                       | Pcdh9_predicted                           | 0.7 | 0.002049272 | 0.016458219 |
| 1378470_at   | progesterone and adipoQ receptor family member V                                                                  | Paqr5                                     | 0.4 | 0.00205165  | 0.016466059 |
| 1379510_at   | Transcribed locus                                                                                                 | ---                                       | 0.5 | 0.002070496 | 0.016604346 |
| 1372894_at   | transmembrane protein 115 (predicted)                                                                             | Tmem115_predict<br>ed                     | 0.5 | 0.002078553 | 0.01665059  |
| 1391414_at   | similar to RIKEN cDNA D930015E06 /// similar to KIAA0922 protein                                                  | LOC679811 ///<br>LOC683642                | 0.7 | 0.002081704 | 0.016661733 |
| 1382812_at   | similar to Protein Njmu-R1 (predicted)                                                                            | RGD1310429_pre<br>dicted                  | 0.5 | 0.002096029 | 0.016753818 |
| 1376640_at   | Hypothetical protein LOC680259                                                                                    | LOC680259                                 | 0.5 | 0.002096264 | 0.016753818 |
| 1370045_at   | polymerase (DNA directed), gamma                                                                                  | Polg                                      | 0.7 | 0.002100246 | 0.016777486 |
| 1378144_at   | Transcribed locus                                                                                                 | ---                                       | 0.6 | 0.002112569 | 0.016851372 |
| 1379661_at   | ---                                                                                                               | ---                                       | 0.4 | 0.002120757 | 0.016883939 |
| 1390441_at   | Development and differentiation enhancing (predicted)                                                             | Ddef1_predicted                           | 0.6 | 0.002124983 | 0.016909399 |
| 1396227_at   | mitochondrial ribosome recycling factor                                                                           | Mrrf                                      | 0.5 | 0.002129048 | 0.016917156 |
| 1368081_at   | ATP-binding cassette, sub-family A (ABC1), member 2                                                               | Abca2                                     | 0.6 | 0.00213162  | 0.016917156 |
| 1381800_at   | Transcribed locus                                                                                                 | ---                                       | 0.4 | 0.002132129 | 0.016917156 |
| 1373396_at   | similar to RIKEN cDNA 2610304G08 gene (predicted)                                                                 | RGD1304782_pre<br>dicted                  | 0.7 | 0.002133847 | 0.016922619 |
| 1385002_at   | similar to c-myc promoter binding protein (predicted)                                                             | RGD1562639_pre<br>dicted                  | 0.7 | 0.002147318 | 0.017004855 |
| 1389376_at   | Transcribed locus                                                                                                 | ---                                       | 0.6 | 0.002163098 | 0.017098206 |
| 1396333_at   | Transcribed locus                                                                                                 | ---                                       | 0.6 | 0.002163264 | 0.017098206 |
| 1369530_at   | insulin related protein 2 (islet 2)                                                                               | Isl2                                      | 0.3 | 0.002168699 | 0.017124704 |
| 1372722_at   | Transcribed locus                                                                                                 | ---                                       | 0.7 | 0.002171727 | 0.017140388 |
| 1370146_at   | glycine receptor, beta subunit                                                                                    | Glrbb                                     | 0.3 | 0.002183697 | 0.017210082 |
| 1389598_at   | ---                                                                                                               | ---                                       | 0.4 | 0.002188139 | 0.01722858  |
| 1382566_at   | Transcribed locus                                                                                                 | ---                                       | 0.5 | 0.002190252 | 0.017236972 |
| 1389416_at   | RGD1560398 (predicted)                                                                                            | RGD1560398_pre<br>dicted                  | 0.4 | 0.002193527 | 0.017254487 |
| 1389465_at   | Transcribed locus                                                                                                 | ---                                       | 0.5 | 0.002196385 | 0.017268713 |
| 1377980_at   | similar to chromosome 20 open reading frame 102 (predicted) /// similar to stromal cell derived factor receptor 1 | LOC683938 ///<br>RGD1305725_pre<br>dicted | 0.4 | 0.002200283 | 0.017291089 |
| 1390145_at   | Transcribed locus                                                                                                 | ---                                       | 0.6 | 0.002201616 | 0.017293304 |
| 1390113_a_at | La ribonucleoprotein domain family, member 1 (predicted)                                                          | Larp1_predicted                           | 0.7 | 0.002209987 | 0.017336284 |
| 1392101_s_at | Transcribed locus                                                                                                 | ---                                       | 0.5 | 0.002210217 | 0.017336284 |
| 1376211_a_at | potassium channel tetramerisation domain containing 6 (predicted)                                                 | Kctd6_predicted                           | 0.5 | 0.00221025  | 0.017336284 |
| 1382183_at   | Transcribed locus                                                                                                 | ---                                       | 0.7 | 0.002217881 | 0.01735549  |
| 1367733_at   | carbonic anhydrase 2                                                                                              | Ca2                                       | 0.5 | 0.002217974 | 0.01735549  |
| 1395546_at   | Transcribed locus                                                                                                 | ---                                       | 0.6 | 0.002221536 | 0.017375092 |
| 1374084_at   | Transcribed locus                                                                                                 | ---                                       | 0.6 | 0.002225103 | 0.017393241 |
| 1380314_at   | similar to hypothetical protein FLJ38984 (predicted)                                                              | RGD1563072_pre<br>dicted                  | 0.2 | 0.002226405 | 0.017393241 |
| 1394078_at   | ---                                                                                                               | ---                                       | 0.3 | 0.00223284  | 0.017397503 |
| 1398346_at   | Transcribed locus                                                                                                 | ---                                       | 0.5 | 0.002233921 | 0.017397503 |
| 1372618_at   | similar to hypothetical protein FLJ13045 (predicted)                                                              | RGD1307615_pre<br>dicted                  | 0.7 | 0.002238049 | 0.017421405 |

|            |                                                                                                                                                                  |                                                                         |     |             |             |
|------------|------------------------------------------------------------------------------------------------------------------------------------------------------------------|-------------------------------------------------------------------------|-----|-------------|-------------|
| 1387261_at | protein phosphatase 3, catalytic subunit, beta isoform                                                                                                           | Ppp3cb                                                                  | 0.5 | 0.002242049 | 0.017434087 |
| 1381206_at | Transcribed locus                                                                                                                                                | ---                                                                     | 0.6 | 0.002242858 | 0.017434087 |
| 1384389_at | Transcribed locus                                                                                                                                                | ---                                                                     | 0.5 | 0.002244155 | 0.017435927 |
| 1372555_at | similar to RIKEN cDNA E030034P13 (predicted)                                                                                                                     | RGD1309385_predicted                                                    | 0.7 | 0.002254342 | 0.017488468 |
| 1374235_at | Down syndrome critical region gene 1-like 1                                                                                                                      | Dscr1l1                                                                 | 0.5 | 0.00225517  | 0.017488468 |
| 1392778_at | Transcribed locus, weakly similar to XP_001056676.1 similar to Discs large homolog 5 (Placenta and prostate DLG) (Discs large protein P-dlg) [Rattus norvegicus] | ---                                                                     | 0.6 | 0.002259563 | 0.017500096 |
| 1376239_at | ATPase, H+ transporting, V1 subunit C, isoform 2                                                                                                                 | Atp6v1c2                                                                | 0.7 | 0.002259862 | 0.017500096 |
| 1387802_at | discs, large (Drosophila) homolog-associated protein 1                                                                                                           | Dlgap1                                                                  | 0.4 | 0.002267044 | 0.017542697 |
| 1389806_at | Transcribed locus                                                                                                                                                | ---                                                                     | 0.6 | 0.00228081  | 0.017620839 |
| 1379268_at | Transcribed locus                                                                                                                                                | ---                                                                     | 0.5 | 0.002282498 | 0.017625599 |
| 1389164_at | hect domain and RLD 3 (predicted)                                                                                                                                | Herc3_predicted                                                         | 0.6 | 0.002294009 | 0.017706173 |
| 1389066_at | Down syndrome critical region gene 1-like 1                                                                                                                      | Dscr1l1                                                                 | 0.6 | 0.002297062 | 0.017721422 |
| 1371006_at | jagged 2                                                                                                                                                         | Jag2                                                                    | 0.5 | 0.002298607 | 0.017722476 |
| 1374859_at | ---                                                                                                                                                              | ---                                                                     | 0.5 | 0.002299353 | 0.017722476 |
| 1384393_at | Transcribed locus                                                                                                                                                | ---                                                                     | 0.4 | 0.002305602 | 0.017752701 |
| 1374249_at | similar to Hypothetical protein MGC38513                                                                                                                         | RGD1304580                                                              | 0.7 | 0.00230683  | 0.017752701 |
| 1371699_at | Transcribed locus, moderately similar to XP_001136961.1 fibrinogen, beta chain isoform 1 [Pan troglodytes]                                                       | ---                                                                     | 0.7 | 0.002307592 | 0.017752701 |
| 1389507_at | neural precursor cell expressed, developmentally down-regulated 4-like                                                                                           | Nedd4l                                                                  | 0.6 | 0.002313518 | 0.017777589 |
| 1374528_at | Regulator of G-protein signalling 3                                                                                                                              | Rgs3                                                                    | 0.4 | 0.002315151 | 0.017777589 |
| 1374496_at | similar to RIKEN cDNA 1200009O22; EST AI316813                                                                                                                   | RGD1310827                                                              | 0.6 | 0.002319565 | 0.017794875 |
| 1375226_at | TBC1 domain family, member 10b (predicted)                                                                                                                       | Tbc1d10b_predicted                                                      | 0.6 | 0.00232265  | 0.017796757 |
| 1382602_at | ---                                                                                                                                                              | ---                                                                     | 0.7 | 0.002330164 | 0.017834593 |
| 1368821_at | folliculin-like 1                                                                                                                                                | Fstl1                                                                   | 0.3 | 0.002333656 | 0.017844708 |
| 1390595_at | Transcribed locus                                                                                                                                                | ---                                                                     | 0.5 | 0.002335546 | 0.017845331 |
| 1375242_at | similar to tumor suppressor candidate 5                                                                                                                          | LOC687797                                                               | 0.2 | 0.002348118 | 0.017905352 |
| 1384530_at | similar to RIKEN cDNA 1810048J11 (predicted) /// hypothetical protein LOC687944 /// hypothetical protein LOC690208 /// similar to B0511.12                       | LOC687944 ///<br>LOC690208 ///<br>LOC690217 ///<br>RGD1305147_predicted | 0.7 | 0.002352257 | 0.017917431 |
| 1376187_at | Solute carrier family 35 (UDP-glucuronic acid/UDP-N-acetylgalactosamine dual transporter), member D1 (predicted)                                                 | Slc35d1_predicted                                                       | 0.7 | 0.002358444 | 0.017950803 |
| 1384309_at | Transcribed locus                                                                                                                                                | ---                                                                     | 0.7 | 0.002370773 | 0.018019626 |
| 1374761_at | golgi associated, gamma adaptin ear containing, ARF binding protein 1                                                                                            | Gga1                                                                    | 0.7 | 0.002373969 | 0.018035586 |
| 1389681_at | Poliovirus receptor-related 2 (herpesvirus entry mediator B)                                                                                                     | Pvr12                                                                   | 0.6 | 0.002388557 | 0.018129663 |
| 1378229_at | Leucine rich repeat and fibronectin type III domain containing 1 (predicted)                                                                                     | Lrfn1_predicted                                                         | 0.6 | 0.002402262 | 0.018216879 |
| 1387141_at | dihydropyrimidinase-like 5                                                                                                                                       | Dpysl5                                                                  | 0.6 | 0.002412869 | 0.018272038 |
| 1370922_at | cortixin                                                                                                                                                         | Ctxn                                                                    | 0.4 | 0.002424525 | 0.018351856 |
| 1384248_at | Transcribed locus                                                                                                                                                | ---                                                                     | 0.6 | 0.00243387  | 0.018397192 |
| 1399039_at | similar to DnaJ homolog subfamily B member 10 (mDJ8) /// similar to DnaJ (Hsp40) homolog, subfamily B, member 10 isoform 2                                       | LOC681650 ///<br>LOC689593                                              | 0.6 | 0.002450584 | 0.018504306 |
| 1378498_at | ---                                                                                                                                                              | ---                                                                     | 0.3 | 0.002456879 | 0.018537036 |
| 1392865_at | ---                                                                                                                                                              | ---                                                                     | 0.6 | 0.002479491 | 0.018681938 |
| 1377614_at | similar to hypothetical protein FLJ90652                                                                                                                         | LOC293494                                                               | 0.7 | 0.002483555 | 0.018703992 |
| 1378888_at | Transcribed locus                                                                                                                                                | ---                                                                     | 0.5 | 0.002494384 | 0.018751203 |
| 1372446_at | protein phosphatase 1, regulatory (inhibitor) subunit 2                                                                                                          | Ppp1r2                                                                  | 0.5 | 0.00250198  | 0.018782553 |
| 1391574_at | ---                                                                                                                                                              | ---                                                                     | 0.5 | 0.002508587 | 0.018814976 |
| 1382057_at | ---                                                                                                                                                              | ---                                                                     | 0.7 | 0.002512784 | 0.018829281 |
| 1392763_at | 1-acylglycerol-3-phosphate O-acyltransferase 1                                                                                                                   | Agpat1                                                                  | 0.6 | 0.00251615  | 0.018845921 |
| 1386969_at | neuritin                                                                                                                                                         | Nrn1                                                                    | 0.3 | 0.002524599 | 0.018900593 |

|              |                                                                                                |                                    |     |             |             |
|--------------|------------------------------------------------------------------------------------------------|------------------------------------|-----|-------------|-------------|
| 1382967_at   | G protein-coupled receptor 64                                                                  | Gpr64                              | 0.6 | 0.0025358   | 0.018967186 |
| 1373249_at   | Transcribed locus                                                                              | ---                                | 0.7 | 0.002542013 | 0.018979133 |
| 1376706_at   | Transcribed locus                                                                              | ---                                | 0.7 | 0.002584238 | 0.019198918 |
| 1390645_at   | Transcribed locus                                                                              | ---                                | 0.6 | 0.002592422 | 0.019224599 |
| 1376302_at   | Coilin                                                                                         | Coil                               | 0.7 | 0.002595684 | 0.019231443 |
| 1391995_at   | tripartite motif protein 37 (predicted)                                                        | Trim37_predicted                   | 0.5 | 0.00260812  | 0.019306193 |
| 1388757_at   | Adrenergic receptor kinase, beta 1                                                             | Adrbk1                             | 0.6 | 0.002611823 | 0.019324905 |
| 1379579_at   | LEA_4 domain containing protein RGD1359600                                                     | RGD1359600                         | 0.6 | 0.002616481 | 0.019350664 |
| 1372862_at   | RAB22A, member RAS oncogene family (predicted)                                                 | Rab22a_predicted                   | 0.6 | 0.002631306 | 0.019434093 |
| 1389800_at   | PWWP domain containing 2 (predicted)                                                           | Pwwp2_predicted                    | 0.6 | 0.002635825 | 0.019458732 |
| 1385606_at   | brain protein 16                                                                               | Brp16                              | 0.5 | 0.002640001 | 0.019480814 |
| 1393040_at   | Transcribed locus                                                                              | ---                                | 0.5 | 0.002648723 | 0.019527651 |
| 1390947_at   | similar to RIKEN cDNA D930036F22 gene (predicted)                                              | RGD1561116_predicted               | 0.7 | 0.002650383 | 0.019531135 |
| 1393587_a_at | similar to RIKEN cDNA 2310047O13 (predicted)                                                   | RGD1309605_predicted               | 0.6 | 0.002655056 | 0.019544829 |
| 1390433_at   | Transcribed locus                                                                              | ---                                | 0.7 | 0.002657437 | 0.019544829 |
| 1384043_at   | Transcribed locus                                                                              | ---                                | 0.6 | 0.002658985 | 0.019544829 |
| 1384269_at   | Transcribed locus                                                                              | ---                                | 0.4 | 0.002659371 | 0.019544829 |
| 1390558_at   | stauferin, RNA binding protein, homolog 2 (Drosophila)                                         | Stau2                              | 0.7 | 0.002661023 | 0.019548235 |
| 1370440_at   | solute carrier family 15, member 4                                                             | Slc15a4                            | 0.6 | 0.002663138 | 0.019553254 |
| 1372345_at   | ---                                                                                            | ---                                | 0.5 | 0.002664083 | 0.019553254 |
| 1399016_at   | MYST histone acetyltransferase 2                                                               | Myst2                              | 0.4 | 0.002668655 | 0.019569344 |
| 1371817_at   | similar to myo-inositol 1-phosphate synthase A1                                                | LOC290651                          | 0.5 | 0.002671534 | 0.019573003 |
| 1373631_at   | RAP1, GTPase activating protein 1                                                              | Rap1ga1                            | 0.6 | 0.002682771 | 0.019623211 |
| 1370571_at   | solute carrier organic anion transporter family, member 3a1                                    | Slco3a1                            | 0.5 | 0.002683159 | 0.019623211 |
| 1378591_at   | Transcribed locus                                                                              | ---                                | 0.6 | 0.002693678 | 0.019674463 |
| 1370747_at   | fibroblast growth factor 9                                                                     | Fgf9                               | 0.4 | 0.002694328 | 0.019674463 |
| 1391653_at   | gamma-aminobutyric acid A receptor, gamma 2                                                    | Gabrg2                             | 0.4 | 0.002707252 | 0.019729617 |
| 1393007_at   | Transcribed locus                                                                              | ---                                | 0.5 | 0.002707305 | 0.019729617 |
| 1369167_at   | glial cell line derived neurotrophic factor family receptor alpha 2                            | Gfra2                              | 0.5 | 0.002711041 | 0.019748096 |
| 1389027_at   | lectin, mannose-binding 2-like (predicted)                                                     | Lman2l_predicted                   | 0.6 | 0.002715946 | 0.019772605 |
| 1393659_at   | translocation associated membrane protein 1-like 1 (predicted)                                 | Tram111_predicted                  | 0.5 | 0.00271681  | 0.019772605 |
| 1388184_at   | isoprenylcysteine carboxyl methyltransferase                                                   | Icmt                               | 0.5 | 0.002720129 | 0.019788005 |
| 1390495_at   | Transcribed locus                                                                              | ---                                | 0.5 | 0.002724003 | 0.019807424 |
| 1374000_at   | helicase with zinc finger domain (predicted)                                                   | Helz_predicted                     | 0.5 | 0.002726451 | 0.019808298 |
| 1390501_at   | Transcribed locus, moderately similar to XP_001149369.1 secernin 3 isoform 5 [Pan troglodytes] | ---                                | 0.5 | 0.002731187 | 0.019816675 |
| 1383322_at   | RAS-like family 11 member B                                                                    | Rasl11b                            | 0.6 | 0.002731285 | 0.019816675 |
| 1374196_at   | lanC (bacterial lantibiotic synthetase component C)-like 1                                     | Lanc1                              | 0.4 | 0.002745446 | 0.019875482 |
| 1375435_at   | hypothetical LOC308765 (predicted) /// hypothetical protein LOC685841                          | LOC685841 /// RGD1311021_predicted | 0.7 | 0.00275046  | 0.019896035 |
| 1391229_at   | calcium/calmodulin-dependent protein kinase I gamma                                            | Camk1g                             | 0.6 | 0.002762619 | 0.019955885 |
| 1376869_at   | Transcribed locus                                                                              | ---                                | 0.6 | 0.002771383 | 0.019980855 |
| 1376633_at   | Transcribed locus                                                                              | ---                                | 0.6 | 0.002773364 | 0.019980855 |
| 1384301_at   | Transcribed locus                                                                              | ---                                | 0.6 | 0.002778884 | 0.020000825 |
| 1390141_at   | methylenetetrahydrofolate dehydrogenase (NADP+ dependent) 1-like (predicted)                   | Mthfd1l_predicted                  | 0.5 | 0.002779784 | 0.020000825 |
| 1390741_at   | similar to KIAA1086 protein (predicted)                                                        | RGD1304737_predicted               | 0.7 | 0.002781756 | 0.020006259 |
| 1372908_at   | splA/ryanodine receptor domain and SOCS box containing 3 (predicted)                           | Spsb3_predicted                    | 0.7 | 0.002792671 | 0.020023475 |
| 1384197_at   | ---                                                                                            | ---                                | 0.6 | 0.00280223  | 0.020074511 |
| 1393618_at   | Retinoic acid receptor responder (tazarotene induced) 2                                        | Rarres2                            | 0.7 | 0.00285656  | 0.020400784 |
| 1386569_at   | Similar to CG18769-PB, isoform B                                                               | LOC294560                          | 0.3 | 0.002857697 | 0.020400784 |

|              |                                                                                        |                         |     |             |             |
|--------------|----------------------------------------------------------------------------------------|-------------------------|-----|-------------|-------------|
| 1394605_at   | similar to CDNA sequence BC017647 (predicted)                                          | RGD1566149_predicted    | 0.6 | 0.002859849 | 0.020407286 |
| 1368115_at   | claudin 3                                                                              | Cldn3                   | 0.7 | 0.002861388 | 0.020409418 |
| 1373055_at   | Transcribed locus                                                                      | ---                     | 0.7 | 0.002871308 | 0.020471295 |
| 1391595_at   | La ribonucleoprotein domain family, member 6 (predicted)                               | Larp6_predicted         | 0.6 | 0.002873039 | 0.020474757 |
| 1389744_at   | ---                                                                                    | ---                     | 0.6 | 0.002878514 | 0.020496015 |
| 1388349_at   | ---                                                                                    | ---                     | 0.4 | 0.002889761 | 0.020567193 |
| 1390512_at   | Transcribed locus                                                                      | ---                     | 0.5 | 0.00290785  | 0.020634763 |
| 1370122_at   | RAB27B, member RAS oncogene family                                                     | Rab27b                  | 0.5 | 0.002908036 | 0.020634763 |
| 1398902_at   | similar to mKIAA0664 protein (predicted)                                               | RGD1307222_predicted    | 0.5 | 0.002914477 | 0.020666823 |
| 1383155_at   | amyotrophic lateral sclerosis 2 (juvenile) chromosome region, candidate 13 (predicted) | Als2cr13_predicted      | 0.7 | 0.002917211 | 0.020673111 |
| 1381906_at   | tumor protein D52 (predicted)                                                          | Tpd52_predicted         | 0.6 | 0.002926728 | 0.020731617 |
| 1395694_at   | F-box only protein 9                                                                   | Fbxo9                   | 0.5 | 0.002933161 | 0.020768243 |
| 1378215_at   | GIY-YIG domain containing 2                                                            | Giyd2                   | 0.7 | 0.00293612  | 0.020780248 |
| 1389594_at   | similar to Protein C20orf22 homolog                                                    | LOC499913               | 0.3 | 0.002995273 | 0.021130037 |
| 1374175_at   | similar to porcupine-D (predicted)                                                     | RGD1564947_predicted    | 0.6 | 0.002998707 | 0.021130037 |
| 1393622_at   | ---                                                                                    | ---                     | 0.6 | 0.002999281 | 0.021130037 |
| 1390167_at   | similar to hypothetical protein FLJ30373 (predicted)                                   | RGD1306256_predicted    | 0.4 | 0.003000959 | 0.021130037 |
| 1388208_a_at | ret proto-oncogene                                                                     | Ret                     | 0.4 | 0.003005635 | 0.021152135 |
| 1396189_at   | Transcribed locus                                                                      | ---                     | 0.6 | 0.003025739 | 0.021234478 |
| 1374653_at   | similar to CG12125-PA (predicted)                                                      | RGD1310887_predicted    | 0.7 | 0.003027444 | 0.021234478 |
| 1368008_at   | prominin 1                                                                             | Prom1                   | 0.6 | 0.003028702 | 0.021234478 |
| 1369408_at   | deleted in bladder cancer chromosome region candidate 1 (human)                        | Dbccr1                  | 0.5 | 0.003033352 | 0.021250142 |
| 1376780_at   | ---                                                                                    | ---                     | 0.6 | 0.003038232 | 0.02127409  |
| 1387664_at   | ATPase, H transporting, lysosomal V1 subunit B2                                        | Atp6v1b2                | 0.3 | 0.003041903 | 0.021290734 |
| 1379284_at   | similar to RIKEN cDNA 2810457106 (predicted)                                           | RGD1310357_predicted    | 0.6 | 0.003047658 | 0.021312877 |
| 1387793_at   | solute carrier family 9 (sodium/hydrogen exchanger), isoform 3 regulator 1             | Slc9a3r1                | 0.6 | 0.003060173 | 0.021369369 |
| 1376345_at   | dopamine receptor D1 interacting protein                                               | Drd1ip                  | 0.5 | 0.003071264 | 0.021415848 |
| 1373658_at   | Rac GTPase-activating protein 1 (predicted)                                            | Racgap1_predicted       | 0.7 | 0.003071497 | 0.021415848 |
| 1373339_at   | ---                                                                                    | ---                     | 0.6 | 0.003075208 | 0.021432633 |
| 1381269_at   | Transcribed locus                                                                      | ---                     | 0.6 | 0.003099728 | 0.021530544 |
| 1368875_a_at | neurexin 2                                                                             | Nrxn2                   | 0.7 | 0.003120166 | 0.021640669 |
| 1367740_at   | creatine kinase, brain                                                                 | Ckb                     | 0.5 | 0.003146361 | 0.02179922  |
| 1383967_at   | Transcribed locus                                                                      | ---                     | 0.7 | 0.0031511   | 0.021822862 |
| 1379318_at   | Similar to RIKEN cDNA 2610019F03                                                       | LOC498662               | 0.6 | 0.003155266 | 0.021837654 |
| 1384360_at   | Transcribed locus                                                                      | ---                     | 0.5 | 0.003174999 | 0.021951405 |
| 1368047_at   | solute carrier family 13 (sodium-dependent dicarboxylate transporter), member 3        | Slc13a3                 | 0.6 | 0.003186103 | 0.022009667 |
| 1370802_at   | similar to integrin beta-5 (predicted)                                                 | RGD1563276_predicted    | 0.5 | 0.003196357 | 0.022071235 |
| 1374278_at   | Transcribed locus                                                                      | ---                     | 0.7 | 0.003200918 | 0.022084186 |
| 1372475_at   | PTEN induced putative kinase 1 (predicted)                                             | Pink1_predicted         | 0.5 | 0.003206143 | 0.022107952 |
| 1382100_at   | similar to RIKEN cDNA 2310047O13 (predicted)                                           | RGD1309605_predicted    | 0.7 | 0.003207991 | 0.022107952 |
| 1383692_at   | hypothetical protein LOC681037 /// hypothetical protein LOC683855                      | LOC681037 /// LOC683855 | 0.6 | 0.003208395 | 0.022107952 |
| 1376651_at   | Transcribed locus                                                                      | ---                     | 0.7 | 0.003222833 | 0.022179565 |
| 1368292_at   | dynamin 1                                                                              | Dnm1                    | 0.5 | 0.003226416 | 0.022185643 |
| 1393230_s_at | similar to KIAA0564 protein (predicted)                                                | RGD1308772_predicted    | 0.6 | 0.003227763 | 0.022185643 |
| 1398662_at   | Transcribed locus                                                                      | ---                     | 0.7 | 0.003237836 | 0.022245585 |
| 1388889_at   | putative aminopeptidase Fxna                                                           | Fxna                    | 0.7 | 0.003240805 | 0.022256683 |
| 1378309_at   | ubiquitin specific protease 20 (predicted)                                             | Usp20_predicted         | 0.7 | 0.003249865 | 0.022282817 |
| 1370672_a_at | dynamin 3                                                                              | Dnm3                    | 0.4 | 0.003251241 | 0.022282817 |
| 1389167_at   | mitogen-activated protein kinase associated protein 1                                  | Mapkap1                 | 0.6 | 0.003251382 | 0.022282817 |
| 1388532_at   | similar to hypothetical protein                                                        | RGD1310571              | 0.7 | 0.003252739 | 0.022282817 |
| 1383726_at   | hypothetical LOC294715                                                                 | RGD1309360              | 0.5 | 0.003254953 | 0.022288705 |



|              |                                                                                              |                      |     |             |             |
|--------------|----------------------------------------------------------------------------------------------|----------------------|-----|-------------|-------------|
| 1377729_at   | elongation of very long chain fatty acids (FEN1/Elo2, SUR4/Elo3, yeast)-like 4 (predicted)   | Elov14_predicted     | 0.7 | 0.003269031 | 0.022357179 |
| 1383701_at   | ---                                                                                          | ---                  | 0.5 | 0.00327655  | 0.022371396 |
| 1368123_at   | insulin-like growth factor 1 receptor                                                        | Igf1r                | 0.5 | 0.003283141 | 0.022407096 |
| 1385170_at   | ollistatin-like 5 (predicted)                                                                | Fstl5_predicted      | 0.7 | 0.003287451 | 0.022427207 |
| 1376310_at   | ---                                                                                          | ---                  | 0.5 | 0.003296746 | 0.022481293 |
| 1395474_at   | Transcribed locus                                                                            | ---                  | 0.5 | 0.003300597 | 0.02248255  |
| 1373794_at   | EGL nine homolog 2 (C. elegans)                                                              | Egln2                | 0.5 | 0.003301031 | 0.02248255  |
| 1375127_at   | ---                                                                                          | ---                  | 0.5 | 0.003304279 | 0.022490272 |
| 1380128_at   | Leucine zipper-EF-hand containing transmembrane protein 2                                    | Letm2                | 0.7 | 0.003304899 | 0.022490272 |
| 1367900_at   | glycogenin 1                                                                                 | Gyg1                 | 0.7 | 0.00330743  | 0.022498186 |
| 1385460_at   | WD repeat and SOCS box-containing 2                                                          | Wsb2                 | 0.6 | 0.003321254 | 0.022564221 |
| 1377267_at   | melanoma antigen, family E, 1 (predicted)                                                    | Magee1_predicted     | 0.6 | 0.003325615 | 0.022575204 |
| 1388705_at   | similar to selenoprotein SelM (predicted)                                                    | RGD1565037_predicted | 0.4 | 0.003328618 | 0.02257564  |
| 1398785_at   | multiple endocrine neoplasia 1                                                               | Men1                 | 0.6 | 0.003329797 | 0.02257564  |
| 1377112_at   | cytidine deaminase (predicted)                                                               | Cda_predicted        | 0.7 | 0.003334367 | 0.022597308 |
| 1388831_at   | Solute carrier family 9 (sodium/hydrogen exchanger), isoform 3 regulator 2                   | Slc9a3r2             | 0.6 | 0.003337534 | 0.02260825  |
| 1377408_at   | phospholipase A2, group VI                                                                   | Pla2g6               | 0.5 | 0.003349847 | 0.022655544 |
| 1378524_at   | ring finger protein (C3HC4 type) 19 (predicted)                                              | Rnf19_predicted      | 0.6 | 0.003353122 | 0.022668374 |
| 1392467_at   | inositol (myo)-1(or 4)-monophosphatase 2                                                     | Impa2                | 0.5 | 0.003364992 | 0.02271539  |
| 1376215_at   | similar to hypothetical protein 9630025C22 (predicted)                                       | RGD1559945_predicted | 0.5 | 0.003367486 | 0.02271539  |
| 1374582_at   | potassium channel tetramerisation domain containing 9 (predicted)                            | Kctd9_predicted      | 0.5 | 0.003369152 | 0.02271539  |
| 1387407_at   | nucleosome assembly protein 1-like 3                                                         | Nap1l3               | 0.6 | 0.00337911  | 0.022721768 |
| 1383642_at   | ---                                                                                          | ---                  | 0.5 | 0.003387881 | 0.022758525 |
| 1379354_at   | exostoses (multiple)-like 2                                                                  | Extl2                | 0.6 | 0.003388596 | 0.022758525 |
| 1373848_at   | similar to RIKEN cDNA 5730449L18 (predicted)                                                 | RGD1308584_predicted | 0.6 | 0.003391831 | 0.022761663 |
| 1369065_a_at | ATPase, Ca++ transporting, cardiac muscle, slow twitch 2                                     | Atp2a2               | 0.5 | 0.00340647  | 0.02285058  |
| 1390707_at   | regulator of G-protein signalling 10                                                         | Rgs10                | 0.5 | 0.003417826 | 0.022908475 |
| 1369674_at   | purinergic receptor P2X, ligand-gated ion channel, 5                                         | P2rx5                | 0.5 | 0.003435435 | 0.023016353 |
| 1394290_at   | Transcribed locus                                                                            | ---                  | 0.4 | 0.003477041 | 0.02321038  |
| 1394258_at   | ---                                                                                          | ---                  | 0.6 | 0.003484879 | 0.023253264 |
| 1376842_at   | Transcribed locus                                                                            | ---                  | 0.5 | 0.003498449 | 0.023305989 |
| 1389307_at   | similar to Amyloid beta (A4) precursor-like protein 1 (predicted)                            | RGD1561211_predicted | 0.5 | 0.003502317 | 0.023320401 |
| 1373170_at   | G protein pathway suppressor 2 (predicted)                                                   | Gps2_predicted       | 0.8 | 0.003503448 | 0.023320401 |
| 1375028_at   | Transcribed locus                                                                            | ---                  | 0.6 | 0.00350517  | 0.023322423 |
| 1381974_at   | BTB (POZ) domain containing 3 (predicted)                                                    | Btbd3_predicted      | 0.7 | 0.003512932 | 0.023364617 |
| 1381178_at   | Transcribed locus                                                                            | ---                  | 0.7 | 0.003522086 | 0.023416034 |
| 1371211_a_at | neuregulin 1                                                                                 | Nrg1                 | 0.3 | 0.003538914 | 0.023489935 |
| 1371920_at   | polymerase (DNA-directed), delta interacting protein 2 (predicted)                           | Poldip2_predicted    | 0.6 | 0.003544687 | 0.023518762 |
| 1382807_at   | similar to hypothetical protein                                                              | RGD1310450           | 0.6 | 0.003555006 | 0.023577714 |
| 1384834_at   | cordon-bleu (predicted)                                                                      | Cobl_predicted       | 0.7 | 0.003563064 | 0.023586925 |
| 1397015_at   | Transcribed locus                                                                            | ---                  | 0.5 | 0.0035639   | 0.023586925 |
| 1398471_at   | component of oligomeric golgi complex 6                                                      | Cog6                 | 0.7 | 0.003566531 | 0.023587577 |
| 1382013_at   | ---                                                                                          | ---                  | 0.5 | 0.003573745 | 0.023620688 |
| 1378026_at   | Transcribed locus                                                                            | ---                  | 0.5 | 0.003575244 | 0.023620688 |
| 1383843_at   | similar to homolog of Human holocarboxylase synthetase gene HLCS (predicted)                 | RGD1565360_predicted | 0.4 | 0.003579766 | 0.023637087 |
| 1377601_at   | similar to C21orf70 protein                                                                  | RGD1311257           | 0.7 | 0.003591541 | 0.023705321 |
| 1395921_at   | similar to Ubiquitin carboxyl-terminal hydrolase 35 (Ubiquitin thiolesterase 35) (predicted) | RGD1565984_predicted | 0.7 | 0.003594524 | 0.023705986 |
| 1384745_at   | piwi like homolog 2 (Drosophila) (predicted)                                                 | Piwi2_predicted      | 0.4 | 0.00360102  | 0.023729795 |
| 1383014_at   | Transcribed locus                                                                            | ---                  | 0.4 | 0.003613314 | 0.02377472  |
| 1386282_x_at | SNF related kinase /// hypothetical gene supported by NM_138833                              | LOC367880 /// Snrk   | 0.7 | 0.003631816 | 0.023865804 |
| 1396172_at   | CDC16 cell division cycle 16 homolog (S. cerevisiae)                                         | Cdc16                | 0.5 | 0.003634625 | 0.023874438 |

|              |                                                                                                         |                         |     |             |             |
|--------------|---------------------------------------------------------------------------------------------------------|-------------------------|-----|-------------|-------------|
| 1382866_at   | similar to Putative protein 15E1.2 (predicted)                                                          | RGD1309698_predicted    | 0.6 | 0.003648471 | 0.023920789 |
| 1372553_at   | similar to RIKEN cDNA 2610301B20; EST AI428449                                                          | MGC94199                | 0.6 | 0.003648816 | 0.023920789 |
| 1392422_at   | asparagine-linked glycosylation 9 homolog (yeast, alpha 1,2 mannosyltransferase) (predicted)            | Alg9_predicted          | 0.7 | 0.003653009 | 0.023920789 |
| 1382386_at   | similar to Lmbr1 protein (predicted)                                                                    | RGD1563910_predicted    | 0.5 | 0.003653272 | 0.023920789 |
| 1382319_at   | G protein-coupled receptor 68 (predicted)                                                               | Gpr68_predicted         | 0.7 | 0.003665214 | 0.02397989  |
| 1380082_at   | Transcribed locus                                                                                       | ---                     | 0.7 | 0.003683854 | 0.024073115 |
| 1374663_at   | Transcribed locus                                                                                       | ---                     | 0.7 | 0.003698856 | 0.024152348 |
| 1368528_at   | MIC2 like 1                                                                                             | Mic211                  | 0.7 | 0.003698916 | 0.024152348 |
| 1372548_at   | Cryptochrome 2 (photolyase-like)                                                                        | Cry2                    | 0.4 | 0.003701105 | 0.024157052 |
| 1391802_at   | Transcribed locus                                                                                       | ---                     | 0.7 | 0.00370343  | 0.024162638 |
| 1387898_at   | heat shock protein, alpha-crystallin-related, B6                                                        | Hspb6                   | 0.6 | 0.003706822 | 0.024175181 |
| 1387023_at   | glutathione S-transferase, mu type 3                                                                    | Gstm3                   | 0.4 | 0.003708687 | 0.024177761 |
| 1370200_at   | glutamate dehydrogenase 1                                                                               | Glud1                   | 0.7 | 0.003714383 | 0.024190595 |
| 1390899_at   | similar to leucine-rich repeat transmembrane neuronal 1                                                 | LOC679668 /// LOC684054 | 0.6 | 0.003716539 | 0.024190595 |
| 1372532_at   | phosphatidylinositol transfer protein, membrane-associated 2 (predicted)                                | Pitpnm2_predicted       | 0.6 | 0.00372766  | 0.024253384 |
| 1371935_at   | transmembrane protein 9 (predicted)                                                                     | Tmem9_predicted         | 0.5 | 0.003743521 | 0.024317716 |
| 1373971_at   | 1-acylglycerol-3-phosphate O-acyltransferase 7 (lysophosphatidic acid acyltransferase, eta) (predicted) | Agpat7_predicted        | 0.7 | 0.003765324 | 0.024411528 |
| 1390547_at   | Similar to Transmembrane anchor protein 1                                                               | LOC690599               | 0.7 | 0.003775078 | 0.024465126 |
| 1388738_at   | similar to mKIAA0534 protein (predicted)                                                                | RGD1563485_predicted    | 0.4 | 0.003802361 | 0.02462253  |
| 1381749_at   | Transcribed locus                                                                                       | ---                     | 0.7 | 0.003805459 | 0.024632899 |
| 1368506_at   | regulator of G-protein signaling 4                                                                      | Rgs4                    | 0.3 | 0.003808426 | 0.024642403 |
| 1386088_at   | similar to RIKEN cDNA 1200007B05 gene                                                                   | RGD1305072              | 0.4 | 0.003816514 | 0.024665628 |
| 1385007_at   | zinc finger, CCHC domain containing 9                                                                   | Zcchc9                  | 0.6 | 0.003823152 | 0.024679436 |
| 1396408_at   | similar to RAS-related C3 botulinum substrate 3                                                         | LOC688319               | 0.7 | 0.003831112 | 0.02472112  |
| 1398326_at   | similar to Nur77 downstream protein 2                                                                   | MGC105647               | 0.5 | 0.003836964 | 0.024749169 |
| 1377673_at   | Transcribed locus                                                                                       | ---                     | 0.8 | 0.00384416  | 0.024773335 |
| 1388891_at   | Transcribed locus                                                                                       | ---                     | 0.3 | 0.003852439 | 0.024788306 |
| 1383558_at   | similar to MJ0495-like protein SelB (predicted)                                                         | RGD1560552_predicted    | 0.5 | 0.003854649 | 0.024788306 |
| 1372524_at   | Transcribed locus                                                                                       | ---                     | 0.7 | 0.003856736 | 0.024788306 |
| 1375575_at   | calcium/calmodulin-dependent protein kinase II, beta                                                    | Camk2b                  | 0.7 | 0.003859056 | 0.024788306 |
| 1369309_a_at | tachykinin 1                                                                                            | Tac1                    | 0.5 | 0.003864057 | 0.02479751  |
| 1394431_at   | cytidine and dCMP deaminase domain containing 1                                                         | Cdadc1                  | 0.7 | 0.003870589 | 0.024817968 |
| 1388760_at   | solute carrier family 35, member B4 (predicted)                                                         | Slc35b4_predicted       | 0.6 | 0.003870684 | 0.024817968 |
| 1393623_at   | Coilin                                                                                                  | Coil                    | 0.6 | 0.003873411 | 0.024817968 |
| 1384879_at   | tRNA phosphotransferase 1 (predicted)                                                                   | Trpt1_predicted         | 0.7 | 0.003873581 | 0.024817968 |
| 1380852_at   | hypothetical LOC294883                                                                                  | RGD1305844              | 0.7 | 0.003875052 | 0.024817968 |
| 1377147_at   | TBC1 domain family, member 7 (predicted)                                                                | Tbc1d7_predicted        | 0.7 | 0.003884778 | 0.024843244 |
| 1376176_at   | similar to Microtubule-associated serine/threonine-protein kinase 3                                     | LOC684053 /// LOC688540 | 0.7 | 0.003894793 | 0.024897611 |
| 1386955_at   | septin 5                                                                                                | Sep-05                  | 0.5 | 0.003903322 | 0.024925577 |
| 1396212_at   | Transmembrane and tetratricopeptide repeat containing 2 (predicted)                                     | Tmtc2_predicted         | 0.7 | 0.003913828 | 0.024970767 |
| 1382423_at   | Transcribed locus                                                                                       | ---                     | 0.7 | 0.003928842 | 0.025037426 |
| 1390104_at   | Transcribed locus                                                                                       | ---                     | 0.7 | 0.003935075 | 0.025067435 |
| 1368669_at   | uncoupling protein 2 (mitochondrial, proton carrier)                                                    | Ucp2                    | 0.4 | 0.00393798  | 0.025073969 |
| 1373248_at   | Similar to hypothetical protein FLJ20674 (predicted)                                                    | RGD1565800_predicted    | 0.7 | 0.00394147  | 0.025074846 |
| 1370404_at   | cystatin TE-1                                                                                           | LOC266776               | 0.3 | 0.003942337 | 0.025074846 |
| 1385950_at   | hypothetical protein LOC500102                                                                          | LOC500102               | 0.5 | 0.00395531  | 0.025128213 |
| 1396190_x_at | Transcribed locus                                                                                       | ---                     | 0.6 | 0.003971692 | 0.025206829 |

|              |                                                                                              |                               |     |             |             |
|--------------|----------------------------------------------------------------------------------------------|-------------------------------|-----|-------------|-------------|
| 1370185_at   | contactin associated protein 1                                                               | Cntnap1                       | 0.6 | 0.003972282 | 0.025206829 |
| 1392893_a_at | Transcribed locus                                                                            | ---                           | 0.7 | 0.003993979 | 0.025305455 |
| 1372594_at   | SUMO/sentrin specific protease 5 (predicted) /// similar to SUMO/sentrin specific protease 5 | LOC686286 /// Semp5_predicted | 0.7 | 0.00399872  | 0.025322133 |
| 1383174_at   | Transcribed locus                                                                            | ---                           | 0.7 | 0.00399969  | 0.025322133 |
| 1387941_s_at | phospholipase A2, group VI                                                                   | Pla2g6                        | 0.6 | 0.004002051 | 0.025327331 |
| 1383722_at   | proline synthetase co-transcribed (predicted)                                                | Prosc_predicted               | 0.7 | 0.004030066 | 0.025426364 |
| 1387265_at   | diacylglycerol kinase, gamma                                                                 | Dgkg                          | 0.7 | 0.004047743 | 0.025498764 |
| 1374845_at   | Transcribed locus                                                                            | ---                           | 0.5 | 0.004060422 | 0.025568844 |
| 1368286_at   | solute carrier family 2, (facilitated glucose transporter) member 8                          | Slc2a8                        | 0.6 | 0.004098344 | 0.025768183 |
| 1370544_at   | echinoderm microtubule associated protein like 2                                             | Eml2                          | 0.5 | 0.004120552 | 0.025888019 |
| 1391598_at   | Transcribed locus                                                                            | ---                           | 0.4 | 0.00413292  | 0.025955812 |
| 1378854_at   | 5-methyltetrahydrofolate-homocysteine methyltransferase reductase                            | Mtrr                          | 0.8 | 0.004135388 | 0.025960813 |
| 1374107_at   | elaC homolog 2 (E. coli)                                                                     | Elac2                         | 0.6 | 0.004136873 | 0.025960813 |
| 1375173_at   | RDRC-0918-3 protein                                                                          | LOC246120                     | 0.7 | 0.004146074 | 0.026008628 |
| 1390097_at   | TSPY-like 4                                                                                  | Tspyl4                        | 0.5 | 0.004165408 | 0.026100051 |
| 1372583_at   | Transcribed locus                                                                            | ---                           | 0.7 | 0.004167598 | 0.026103829 |
| 1377404_at   | stanniocalcin 1                                                                              | Stc1                          | 0.6 | 0.004172435 | 0.026113384 |
| 1380585_at   | Transcribed locus                                                                            | ---                           | 0.5 | 0.004186412 | 0.026170965 |
| 1391153_at   | Transcribed locus                                                                            | ---                           | 0.6 | 0.004204091 | 0.026242464 |
| 1385046_at   | hypothetical protein LOC681096 /// hypothetical protein LOC682630                            | LOC681096 /// LOC682630       | 0.6 | 0.004211897 | 0.026253253 |
| 1375940_a_at | ---                                                                                          | ---                           | 0.4 | 0.004212204 | 0.026253253 |
| 1383799_at   | ---                                                                                          | ---                           | 0.6 | 0.004219777 | 0.026280537 |
| 1379536_at   | pleckstrin homology domain containing, family A member 6 (predicted)                         | Plekha6_predicted             | 0.6 | 0.004229644 | 0.026332018 |
| 1398342_at   | similar to Fus1 protein                                                                      | LOC501052                     | 0.4 | 0.004247307 | 0.026431972 |
| 1371855_at   | ---                                                                                          | ---                           | 0.5 | 0.004264124 | 0.026516565 |
| 1374243_at   | Transcribed locus                                                                            | ---                           | 0.7 | 0.004272266 | 0.026537094 |
| 1375972_at   | similar to membrane protein expressed in epithelial-like lung adenocarcinoma (predicted)     | RGD1307493_predicted          | 0.6 | 0.004274968 | 0.026543857 |
| 1388309_at   | high mobility group AT-hook 1                                                                | Hmga1                         | 0.4 | 0.004284167 | 0.026580908 |
| 1377857_at   | Transcribed locus                                                                            | ---                           | 0.6 | 0.004314211 | 0.026737054 |
| 1374553_at   | Transcribed locus                                                                            | ---                           | 0.6 | 0.004319527 | 0.026759915 |
| 1370535_at   | myelin transcription factor 1-like                                                           | Myt11                         | 0.7 | 0.00432235  | 0.026767326 |
| 1371473_at   | cleft lip and palate associated transmembrane protein 1 (predicted)                          | Clptm1_predicted              | 0.5 | 0.004328149 | 0.026793149 |
| 1376520_at   | Transcribed locus                                                                            | ---                           | 0.7 | 0.004331775 | 0.026805506 |
| 1389736_at   | Transcribed locus                                                                            | ---                           | 0.5 | 0.004341163 | 0.026846393 |
| 1372213_at   | similar to hypothetical protein MGC6835                                                      | LOC500300                     | 0.6 | 0.004348995 | 0.026861534 |
| 1399038_at   | ubiquitin specific protease 19                                                               | Usp19                         | 0.6 | 0.004386058 | 0.027019432 |
| 1376232_at   | Transcribed locus                                                                            | ---                           | 0.6 | 0.004393896 | 0.02704502  |
| 1371597_at   | ring finger protein 187 (predicted)                                                          | Rnf187_predicted              | 0.6 | 0.004396891 | 0.02704502  |
| 1387435_at   | ST8 alpha-N-acetyl-neuraminidase alpha-2,8-sialyltransferase 3                               | St8sia3                       | 0.7 | 0.004401469 | 0.027053576 |
| 1373965_at   | similar to hypothetical protein BC013949 (predicted)                                         | RGD1310931_predicted          | 0.5 | 0.004420765 | 0.027162023 |
| 1377865_at   | Transcribed locus                                                                            | ---                           | 0.7 | 0.004433136 | 0.027227863 |
| 1390540_at   | syntaphilin (predicted)                                                                      | Snph_predicted                | 0.7 | 0.004447572 | 0.027296144 |
| 1389063_at   | exportin 6                                                                                   | Xpo6                          | 0.7 | 0.004451269 | 0.027300819 |
| 1386338_at   | Ubiquitin specific protease 22 (predicted)                                                   | Usp22_predicted               | 0.6 | 0.004466366 | 0.027350255 |
| 1372879_at   | AKT1 substrate 1 (proline-rich) (predicted)                                                  | Akt1s1_predicted              | 0.3 | 0.004470775 | 0.027360564 |
| 1376919_at   | Similar to expressed sequence AW212394 (predicted)                                           | RGD1562317_predicted          | 0.7 | 0.004474938 | 0.027362    |
| 1383178_at   | F-box protein 28 (predicted)                                                                 | Fbxo28_predicted              | 0.6 | 0.004488375 | 0.027410884 |
| 1367604_at   | cysteine-rich protein 2                                                                      | Crip2                         | 0.6 | 0.004489186 | 0.027410884 |
| 1387171_at   | glutamate receptor, ionotropic, AMPA2                                                        | Gria2                         | 0.5 | 0.004490392 | 0.027410884 |
| 1393636_at   | Transcribed locus                                                                            | ---                           | 0.6 | 0.004493667 | 0.027415368 |
| 1390336_at   | similar to Protein C21orf63 homolog precursor (predicted)                                    | RGD1307569_predicted          | 0.6 | 0.004506584 | 0.027461108 |
| 1390791_at   | growth arrest-specific 2 like 1 (predicted)                                                  | Gas2l1_predicted              | 0.5 | 0.004512345 | 0.027478362 |
| 1375954_at   | S100 calcium binding protein A13 (predicted)                                                 | S100a13_predicted             | 0.6 | 0.004539131 | 0.027590404 |
| 1372551_at   | Fas-activated serine/threonine kinase                                                        | Fastk                         | 0.5 | 0.004546417 | 0.02761428  |
| 1370374_at   | STEAP family member 3                                                                        | Steap3                        | 0.6 | 0.004550392 | 0.02761779  |

|              |                                                                                                        |                      |     |             |             |
|--------------|--------------------------------------------------------------------------------------------------------|----------------------|-----|-------------|-------------|
| 1372276_at   | Transcribed locus                                                                                      | ---                  | 0.7 | 0.004552032 | 0.02761779  |
| 1374999_at   | Transcribed locus                                                                                      | ---                  | 0.8 | 0.004556506 | 0.02762455  |
| 1370933_at   | myosin IE                                                                                              | Myo1e                | 0.5 | 0.004560884 | 0.027640908 |
| 1384460_at   | Transcribed locus                                                                                      | ---                  | 0.5 | 0.004593374 | 0.027807075 |
| 1398606_at   | golgi phosphoprotein 4                                                                                 | Golph4               | 0.5 | 0.004599545 | 0.027834184 |
| 1380675_s_at | carbonic anhydrase 11                                                                                  | Car11                | 0.6 | 0.004611914 | 0.027855173 |
| 1371068_at   | protocadherin alpha 13                                                                                 | Pcdha13              | 0.7 | 0.004613174 | 0.027855173 |
| 1377424_at   | Transcribed locus                                                                                      | ---                  | 0.6 | 0.00461791  | 0.027873532 |
| 1386927_at   | carnitine palmitoyltransferase 2                                                                       | Cpt2                 | 0.6 | 0.00463072  | 0.027914124 |
| 1387505_at   | guanine nucleotide binding protein, alpha inhibiting 1                                                 | Gnai1                | 0.4 | 0.004654532 | 0.027992425 |
| 1375272_at   | Transcribed locus                                                                                      | ---                  | 0.8 | 0.004655635 | 0.027992425 |
| 1378805_at   | Transcribed locus                                                                                      | ---                  | 0.4 | 0.004656328 | 0.027992425 |
| 1383280_at   | Transcribed locus                                                                                      | ---                  | 0.5 | 0.004662418 | 0.028018796 |
| 1395541_at   | Transcribed locus                                                                                      | ---                  | 0.7 | 0.004665032 | 0.028023421 |
| 1391146_at   | cadherin 11                                                                                            | Cdh11                | 0.6 | 0.004668298 | 0.028023421 |
| 1383258_at   | similar to hypothetical protein FLJ14146                                                               | RGD1310587           | 0.7 | 0.00468298  | 0.028085946 |
| 1384696_at   | similar to RIKEN cDNA 1700001E04                                                                       | MGC116197            | 0.3 | 0.004690343 | 0.028085946 |
| 1384936_at   | ---                                                                                                    | ---                  | 0.6 | 0.004690667 | 0.028085946 |
| 1397764_at   | potassium channel tetramerisation domain containing 5 (predicted)                                      | Kctd5_predicted      | 0.6 | 0.004710506 | 0.028194467 |
| 1373069_at   | mitochondrial ribosomal protein S30 (predicted)                                                        | Mrps30_predicted     | 0.5 | 0.00471746  | 0.028225819 |
| 1368117_at   | gephyrin                                                                                               | Gphn                 | 0.7 | 0.00472271  | 0.028231717 |
| 1373542_at   | sphingosine kinase 2                                                                                   | Sphk2                | 0.7 | 0.004744374 | 0.028283969 |
| 1371721_at   | hypothetical LOC500532                                                                                 | LOC500532            | 0.6 | 0.004754247 | 0.028322297 |
| 1368208_at   | camello-like 1                                                                                         | Cml1                 | 0.6 | 0.004758231 | 0.028335764 |
| 1368646_at   | mitogen-activated protein kinase 9                                                                     | Mapk9                | 0.4 | 0.004761997 | 0.028341259 |
| 1389252_at   | Zinc finger protein 238                                                                                | Zfp238               | 0.5 | 0.004766946 | 0.028346613 |
| 1387498_a_at | Fibroblast growth factor receptor 1                                                                    | Fgfr1                | 0.4 | 0.004778596 | 0.028374852 |
| 1383664_a_at | similar to chromosome 11 open reading frame2 (predicted)                                               | RGD1560544_predicted | 0.5 | 0.004803288 | 0.028459827 |
| 1397442_at   | ---                                                                                                    | ---                  | 0.7 | 0.004807817 | 0.028476401 |
| 1369024_at   | rabaptin, RAB GTPase binding effector protein 2                                                        | Rabep2               | 0.7 | 0.004828013 | 0.028575441 |
| 1379736_at   | solute carrier family 43, member 2 (predicted)                                                         | Slc43a2_predicted    | 0.7 | 0.004832082 | 0.028589239 |
| 1376038_at   | testis expressed gene 2                                                                                | Tex2                 | 0.7 | 0.004847607 | 0.028656687 |
| 1390958_at   | Transcribed locus                                                                                      | ---                  | 0.4 | 0.004848709 | 0.028656687 |
| 1369816_at   | RAB3A, member RAS oncogene family                                                                      | Rab3a                | 0.5 | 0.004850773 | 0.02865859  |
| 1396058_at   | Transcribed locus                                                                                      | ---                  | 0.5 | 0.004853128 | 0.028662208 |
| 1382227_at   | Transcribed locus                                                                                      | ---                  | 0.7 | 0.004858456 | 0.028683377 |
| 1383492_at   | similar to Homeobox protein Hox-D9 (Hox-4.4) (Hox-5.2)                                                 | LOC682957            | 0.5 | 0.004873449 | 0.028751251 |
| 1395286_at   | Transcribed locus                                                                                      | ---                  | 0.5 | 0.004878362 | 0.02876802  |
| 1372235_at   | ---                                                                                                    | ---                  | 0.7 | 0.004886354 | 0.028775782 |
| 1375223_at   | ---                                                                                                    | ---                  | 0.5 | 0.004907922 | 0.028865082 |
| 1389532_at   | Nebulette (predicted)                                                                                  | NebI_predicted       | 0.6 | 0.004908538 | 0.028865082 |
| 1387030_at   | ATP-binding cassette, sub-family C (CFTR/MRP), member 5                                                | Abcc5                | 0.6 | 0.00492099  | 0.028907302 |
| 1383483_at   | Transcribed locus                                                                                      | ---                  | 0.6 | 0.004923408 | 0.02891118  |
| 1384608_at   | Optic atrophy 1 homolog (human)                                                                        | Opa1                 | 0.4 | 0.00493267  | 0.02895523  |
| 1373861_at   | Nedd4 family interacting protein 2 (predicted)                                                         | Ndfip2_predicted     | 0.7 | 0.004943261 | 0.028996702 |
| 1371985_a_at | HLA-B associated transcript 5                                                                          | Bat5                 | 0.8 | 0.004979511 | 0.029163972 |
| 1393309_at   | zinc finger protein ZFP                                                                                | LOC503192            | 0.7 | 0.004981983 | 0.029163972 |
| 1390455_at   | abhydrolase domain containing 2 (predicted)                                                            | Abhd2_predicted      | 0.7 | 0.00498454  | 0.029166033 |
| 1389567_at   | SREBP cleavage activating protein (predicted)                                                          | Scap_predicted       | 0.6 | 0.005020989 | 0.029309365 |
| 1377522_a_at | similar to KIAA1086 protein (predicted)                                                                | RGD1304737_predicted | 0.5 | 0.00502151  | 0.029309365 |
| 1375851_at   | kelch-like 8 (Drosophila) (predicted)                                                                  | Klhl8_predicted      | 0.7 | 0.005031235 | 0.02935571  |
| 1394481_at   | ubiquitin-conjugating enzyme E2Z (putative)                                                            | Ube2z                | 0.6 | 0.005039146 | 0.029391446 |
| 1385981_at   | plasticity related gene 1                                                                              | Prg1                 | 0.7 | 0.005060436 | 0.029479248 |
| 1368964_at   | leucine rich repeat protein 3, neuronal                                                                | Lrrn3                | 0.6 | 0.005072206 | 0.029496544 |
| 1391661_at   | Transcribed locus                                                                                      | ---                  | 0.6 | 0.005073433 | 0.029496544 |
| 1384138_at   | Transcribed locus                                                                                      | ---                  | 0.5 | 0.005077918 | 0.029496544 |
| 1384839_at   | Transcribed locus                                                                                      | ---                  | 0.7 | 0.005100409 | 0.029591365 |
| 1389414_at   | Transcribed locus, weakly similar to XP_001379341.1 similar to env polyprotein [Monodelphis domestica] | ---                  | 0.6 | 0.005103119 | 0.029596649 |

|              |                                                                                    |                      |     |             |             |
|--------------|------------------------------------------------------------------------------------|----------------------|-----|-------------|-------------|
| 1388976_at   | similar to BoIA domain-containing protein like (11.4 kD) (1P25) (predicted)        | RGD1305975_predicted | 0.6 | 0.005128292 | 0.029721685 |
| 1398604_at   | oxysterol binding protein 2 (predicted)                                            | Osbp2_predicted      | 0.7 | 0.005165181 | 0.029880447 |
| 1383613_at   | Transcribed locus                                                                  | ---                  | 0.6 | 0.005168402 | 0.029880447 |
| 1380833_at   | glycosylphosphatidylinositol specific phospholipase D1                             | Gpld1                | 0.7 | 0.005193272 | 0.030003141 |
| 1371723_at   | Ras-related GTP binding C (predicted)                                              | Rragc_predicted      | 0.5 | 0.005201801 | 0.030031315 |
| 1376490_at   | Transcribed locus                                                                  | ---                  | 0.7 | 0.005204114 | 0.030034126 |
| 1370978_at   | secretory carrier membrane protein 1                                               | Scamp1               | 0.7 | 0.005223625 | 0.030073361 |
| 1398272_at   | beta-1,4-N-acetyl-galactosaminyl transferase 1                                     | B4galnt1             | 0.6 | 0.005238298 | 0.030118075 |
| 1370639_at   | PR domain containing 2, with ZNF domain                                            | Prdm2                | 0.7 | 0.005239828 | 0.030118075 |
| 1378857_at   | similar to transcription elongation factor A (SII)-like 5                          | LOC678833            | 0.5 | 0.005240633 | 0.030118075 |
| 1375081_at   | 5',3'-nucleotidase, mitochondrial (predicted)                                      | Nt5m_predicted       | 0.5 | 0.00526839  | 0.030265409 |
| 1385972_at   | kelch repeat and BTB (POZ) domain containing 3 (predicted)                         | Kbtbd3_predicted     | 0.7 | 0.005272654 | 0.030265409 |
| 1378105_at   | Transcribed locus                                                                  | ---                  | 0.4 | 0.005292591 | 0.030338045 |
| 1383560_at   | Similar to RIKEN cDNA 2610528A15                                                   | RGD1305984           | 0.7 | 0.005295278 | 0.030338045 |
| 1382498_x_at | ganglioside-induced differentiation-associated protein 1-like 1 (predicted)        | Gdap111_predicted    | 0.7 | 0.005303571 | 0.03036636  |
| 1378003_at   | similar to T-cell activation leucine repeat-rich protein (predicted)               | RGD1563429_predicted | 0.7 | 0.005306586 | 0.03036636  |
| 1389195_at   | DNA fragmentation factor, alpha subunit                                            | Dffa                 | 0.7 | 0.005309682 | 0.03036636  |
| 1373149_at   | similar to yippee-like 3 (predicted)                                               | RGD1564579_predicted | 0.4 | 0.005313591 | 0.030373074 |
| 1387799_at   | FXYD domain-containing ion transport regulator 2                                   | Fxyd2                | 0.6 | 0.005316665 | 0.03037461  |
| 1385322_at   | Transcribed locus                                                                  | ---                  | 0.7 | 0.005320711 | 0.030387172 |
| 1389541_at   | malignant fibrous histiocytoma amplified sequence 1 (predicted)                    | Mfhas1_predicted     | 0.8 | 0.005345589 | 0.030486908 |
| 1383032_at   | Transcribed locus                                                                  | ---                  | 0.7 | 0.005362438 | 0.030559333 |
| 1396215_at   | Similar to RIKEN cDNA 2610022G08                                                   | LOC502782            | 0.6 | 0.005394161 | 0.030700055 |
| 1384194_at   | Frizzled homolog 7 (Drosophila) (predicted)                                        | Fzd7_predicted       | 0.7 | 0.005408418 | 0.03075991  |
| 1371600_at   | protein kinase inhibitor, gamma                                                    | Pkig                 | 0.7 | 0.005418139 | 0.030797084 |
| 1370472_a_at | potassium large conductance calcium-activated channel, subfamily M, alpha member 1 | Kcma1                | 0.7 | 0.005421351 | 0.030801515 |
| 1390763_at   | ephrin A3                                                                          | Efna3                | 0.7 | 0.005434882 | 0.03085707  |
| 1373613_at   | similar to RIKEN cDNA 4930570C03                                                   | LOC300191            | 0.6 | 0.005442649 | 0.030869203 |
| 1378853_at   | similar to FLJ22405 protein (predicted)                                            | RGD1304842_predicted | 0.7 | 0.005476103 | 0.031048238 |
| 1373162_at   | similar to transmembrane protein 41a                                               | LOC681708            | 0.5 | 0.005486763 | 0.031087246 |
| 1379757_at   | Transcribed locus                                                                  | ---                  | 0.6 | 0.005494118 | 0.031118198 |
| 1368822_at   | folliculin-like 1                                                                  | Fstl1                | 0.5 | 0.00550179  | 0.031149284 |
| 1386914_at   | guanosine monophosphate reductase                                                  | Gmpr                 | 0.5 | 0.005510174 | 0.03116621  |
| 1371606_at   | WD and tetratricopeptide repeats 1 (predicted)                                     | Wdrtc1_predicted     | 0.5 | 0.005514979 | 0.031182665 |
| 1389549_at   | proline synthetase co-transcribed (predicted)                                      | Prosc_predicted      | 0.7 | 0.00551816  | 0.031185568 |
| 1391879_at   | Transcribed locus                                                                  | ---                  | 0.4 | 0.005519284 | 0.031185568 |
| 1372206_at   | similar to chromosome 14 open reading frame 9                                      | RGD1307475           | 0.5 | 0.005529412 | 0.031221342 |
| 1373582_at   | similar to CLIP-170-related protein (predicted)                                    | RGD1306245_predicted | 0.5 | 0.005538086 | 0.031247203 |
| 1394815_at   | ---                                                                                | ---                  | 0.6 | 0.005539691 | 0.031247203 |
| 1383482_at   | Transcribed locus                                                                  | ---                  | 0.4 | 0.005542903 | 0.031248323 |
| 1399166_a_at | similar to B-cell CLL/lymphoma 7B                                                  | LOC368001            | 0.7 | 0.005558116 | 0.031297467 |
| 1397756_at   | similar to BC068281 protein (predicted)                                            | RGD1563701_predicted | 0.6 | 0.005561508 | 0.031301989 |
| 1389725_at   | transmembrane 7 superfamily member 2                                               | Tm7sf2               | 0.5 | 0.005562726 | 0.031301989 |
| 1385314_at   | Transcribed locus                                                                  | ---                  | 0.5 | 0.005580756 | 0.031338792 |
| 1375137_at   | actin related protein 2/3 complex, subunit 2 (predicted)                           | Arpc2_predicted      | 0.3 | 0.005600905 | 0.031398667 |
| 1369922_at   | RDCR-0918-3 protein                                                                | LOC246120            | 0.5 | 0.005607262 | 0.031409251 |
| 1368254_a_at | sphingosine kinase 1                                                               | Sphk1                | 0.6 | 0.005608522 | 0.031409251 |
| 1391274_at   | Transcribed locus                                                                  | ---                  | 0.6 | 0.005620783 | 0.031462445 |
| 1380401_at   | Transcribed locus                                                                  | ---                  | 0.4 | 0.005622242 | 0.031462445 |
| 1385512_at   | similar to APG4-D protein                                                          | LOC686505            | 0.7 | 0.005626249 | 0.031465674 |
| 1374811_at   | ---                                                                                | ---                  | 0.5 | 0.005646187 | 0.031519981 |
| 1371029_at   | polycystic kidney disease 1 homolog                                                | Pkd1                 | 0.6 | 0.005646202 | 0.031519981 |

|              |                                                                                                      |                      |     |             |             |
|--------------|------------------------------------------------------------------------------------------------------|----------------------|-----|-------------|-------------|
| 1370555_at   | voltage gated channel like 1                                                                         | Vgcnl1               | 0.7 | 0.005649406 | 0.031520159 |
| 1368600_at   | solute carrier family 26 (sulfate transporter), member 1                                             | Slc26a1              | 0.7 | 0.005657266 | 0.031542617 |
| 1388933_at   | Transcribed locus                                                                                    | ---                  | 0.4 | 0.005669471 | 0.031584079 |
| 1372176_at   | protein kinase C, alpha                                                                              | Prkca                | 0.7 | 0.005670502 | 0.031584079 |
| 1398890_at   | similar to 2310044H10Rik protein                                                                     | MGC93975             | 0.5 | 0.005672384 | 0.031584079 |
| 1369446_at   | cryptochrome 2 (photolyase-like)                                                                     | Cry2                 | 0.8 | 0.005676979 | 0.031595111 |
| 1381557_at   | guanine nucleotide binding protein, alpha 14                                                         | Gna14                | 0.6 | 0.00568063  | 0.031597902 |
| 1367812_at   | spectrin beta 3                                                                                      | Spnb3                | 0.7 | 0.00568475  | 0.031610133 |
| 1373459_at   | serine/threonine kinase 11 interacting protein (predicted)                                           | Stk11ip_predicted    | 0.6 | 0.005710426 | 0.031720729 |
| 1370132_at   | FK506 binding protein 1b                                                                             | Fkbp1b               | 0.4 | 0.005714634 | 0.031733387 |
| 1368313_a_at | transient receptor potential cation channel, subfamily V, member 1                                   | Trpv1                | 0.3 | 0.005738194 | 0.031831979 |
| 1388490_at   | Brca1 associated protein 1 (predicted)                                                               | Bap1_predicted       | 0.7 | 0.005753336 | 0.031884731 |
| 1379465_at   | hypothetical LOC311134                                                                               | LOC311134            | 0.6 | 0.005754579 | 0.031884731 |
| 1395547_at   | Guanine nucleotide binding protein, alpha q polypeptide                                              | Gnaq                 | 0.5 | 0.005755458 | 0.031884731 |
| 1367549_a_at | adaptor-related protein complex 3, delta 1 subunit                                                   | Ap3d1                | 0.7 | 0.00577415  | 0.031955993 |
| 1373952_at   | protein kinase, AMP-activated, gamma 2 non-catalytic subunit                                         | Prkag2               | 0.6 | 0.005786439 | 0.032008559 |
| 1388030_a_at | gamma-aminobutyric acid (GABA) B receptor 1                                                          | Gabbr1               | 0.5 | 0.005787679 | 0.032008559 |
| 1378386_at   | solute carrier family 2 (facilitated glucose transporter), member 6 (predicted)                      | Slc2a6_predicted     | 0.5 | 0.005811266 | 0.032107391 |
| 1371979_at   | sterol regulatory element binding factor 2 (predicted)                                               | Srebf2               | 0.5 | 0.005823342 | 0.032141723 |
| 1374480_at   | dishevelled associated activator of morphogenesis 1 (predicted)                                      | Daam1_predicted      | 0.7 | 0.005855058 | 0.0322951   |
| 1392941_at   | Transcribed locus                                                                                    | ---                  | 0.6 | 0.005866987 | 0.032344792 |
| 1392607_at   | Similar to erythrocyte membrane protein band 4.1 (elliptocytosis 1, RH-linked) isoform 1 (predicted) | RGD1564762_predicted | 0.7 | 0.005868    | 0.032344792 |
| 1385620_at   | heat shock 105kDa/110kDa protein 1                                                                   | Hsph1                | 0.3 | 0.005883882 | 0.032421469 |
| 1388968_at   | Transcribed locus                                                                                    | ---                  | 0.5 | 0.005898131 | 0.032472269 |
| 1383134_at   | similar to hypothetical protein FLJ12118 (predicted)                                                 | RGD1311612_predicted | 0.6 | 0.005911754 | 0.032498842 |
| 1369417_a_at | opioid binding protein/cell adhesion molecule-like                                                   | Opcml                | 0.4 | 0.005927406 | 0.032550322 |
| 1387147_at   | RAB3C, member RAS oncogene family                                                                    | Rab3c                | 0.7 | 0.005929035 | 0.032550322 |
| 1368386_at   | growth factor receptor bound protein 2                                                               | Grb2                 | 0.7 | 0.005947137 | 0.032638807 |
| 1369733_at   | catenin (cadherin associated protein), beta 1                                                        | Ctnnb1               | 0.5 | 0.005968245 | 0.032743728 |
| 1382435_at   | fizzy/cell division cycle 20 related 1 (Drosophila) (predicted)                                      | Fzr1_predicted       | 0.6 | 0.005971405 | 0.032750137 |
| 1374781_at   | Transcribed locus                                                                                    | ---                  | 0.7 | 0.005977572 | 0.032773034 |
| 1394286_at   | ganglioside-induced differentiation-associated protein 1-like 1 (predicted)                          | Gdap111_predicted    | 0.6 | 0.005983675 | 0.032784637 |
| 1372617_at   | similar to BTB (PO)Z domain containing 2 (predicted)                                                 | RGD1566094_predicted | 0.6 | 0.005987046 | 0.032792186 |
| 1393890_at   | similar to protein phosphatase 1, regulatory (inhibitor) subunit 1C (predicted)                      | RGD1562095_predicted | 0.7 | 0.005990622 | 0.032800851 |
| 1376139_at   | plexin A3                                                                                            | Plexa3               | 0.7 | 0.006006434 | 0.032832778 |
| 1374908_at   | Similar to hypothetical protein B230399E16 (predicted)                                               | RGD1559694_predicted | 0.6 | 0.006018889 | 0.03288993  |
| 1377599_at   | ---                                                                                                  | ---                  | 0.6 | 0.006041941 | 0.032961143 |
| 1376653_at   | putative homeodomain transcription factor 1                                                          | Pthf1                | 0.7 | 0.006058213 | 0.033006125 |
| 1370857_at   | smooth muscle alpha-actin                                                                            | Acta2                | 0.7 | 0.006069791 | 0.033058251 |
| 1392632_at   | similar to mKIAA0227 protein (predicted)                                                             | RGD1565985_predicted | 0.4 | 0.006077512 | 0.033089348 |
| 1370060_at   | solute carrier family 25 (mitochondrial carrier; oxoglutarate carrier), member 11                    | Slc25a11             | 0.6 | 0.006085883 | 0.033123959 |
| 1388406_at   | similar to RIKEN cDNA 1200013P24                                                                     | RGD1308915           | 0.6 | 0.006106313 | 0.033202194 |
| 1389041_at   | Vac14 homolog (S. cerevisiae)                                                                        | Vac14                | 0.6 | 0.006117578 | 0.033252451 |
| 1373494_at   | breakpoint cluster region (predicted)                                                                | Bcr_predicted        | 0.7 | 0.006120426 | 0.033256943 |
| 1373070_at   | Transcribed locus                                                                                    | ---                  | 0.6 | 0.006125583 | 0.033273974 |
| 1369924_at   | synuclein, beta                                                                                      | Sncb                 | 0.7 | 0.006147416 | 0.033360263 |
| 1376817_at   | Transcribed locus                                                                                    | ---                  | 0.7 | 0.006165104 | 0.033411411 |
| 1386971_at   | protein phosphatase 1, regulatory subunit 10                                                         | Ppp1r10              | 0.7 | 0.006261178 | 0.033820643 |

|              |                                                                                            |                            |     |             |             |
|--------------|--------------------------------------------------------------------------------------------|----------------------------|-----|-------------|-------------|
| 1389804_at   | Transcribed locus                                                                          | ---                        | 0.7 | 0.006272992 | 0.033861157 |
| 1382063_at   | galactosidase, alpha                                                                       | Gla                        | 0.6 | 0.006274854 | 0.033861157 |
| 1377011_at   | similar to hypothetical protein CG003 (predicted)                                          | RGD1307034_pre<br>dicted   | 0.7 | 0.006277398 | 0.033863775 |
| 1372358_at   | similar to IQ motif and Sec7 domain 1                                                      | LOC686590                  | 0.7 | 0.006283957 | 0.033888042 |
| 1380760_at   | Transcribed locus                                                                          | ---                        | 0.7 | 0.006309363 | 0.033980487 |
| 1388493_at   | similar to Expressed sequence AW146242 (predicted)                                         | RGD1306494_pre<br>dicted   | 0.7 | 0.006325248 | 0.03405325  |
| 1398300_at   | ATPase, Na <sup>+</sup> /K <sup>+</sup> transporting, beta 3 polypeptide                   | Atp1b3                     | 0.6 | 0.006331255 | 0.034063557 |
| 1393084_at   | Transcribed locus                                                                          | ---                        | 0.6 | 0.006339458 | 0.034065854 |
| 1392836_at   | Upstream binding protein 1 (predicted)                                                     | Ubp1_predicted             | 0.7 | 0.006339712 | 0.034065854 |
| 1372998_at   | ---                                                                                        | ---                        | 0.7 | 0.006373666 | 0.034203606 |
| 1377181_at   | Transcribed locus                                                                          | ---                        | 0.8 | 0.006379192 | 0.034210938 |
| 1393115_at   | similar to ubiquitin specific protease 46 (predicted)                                      | RGD1564808_pre<br>dicted   | 0.7 | 0.006386734 | 0.034240224 |
| 1390474_at   | similar to RIKEN cDNA 9330161F08 (predicted)                                               | RGD1564315_pre<br>dicted   | 0.6 | 0.006423001 | 0.034401015 |
| 1386052_at   | Transcribed locus                                                                          | ---                        | 0.5 | 0.006430429 | 0.03442959  |
| 1376821_at   | Transcribed locus                                                                          | ---                        | 0.7 | 0.006436325 | 0.03444994  |
| 1372040_at   | calmodulin binding transcription activator 2 (predicted)                                   | Camta2_predicted           | 0.6 | 0.006439706 | 0.034456828 |
| 1395226_at   | similar to RIKEN cDNA 9130023F12 gene (predicted)                                          | RGD1311920_pre<br>dicted   | 0.7 | 0.006452938 | 0.034493965 |
| 1396059_at   | UBX domain containing 2                                                                    | Ubx2                       | 0.5 | 0.006458306 | 0.034500231 |
| 1387809_at   | mitogen-activated protein kinase kinase 6                                                  | Map2k6                     | 0.6 | 0.006467242 | 0.0345089   |
| 1383831_at   | glutamyl-tRNA synthase (glutamine-hydrolyzing)-like 1                                      | Qrs1                       | 0.7 | 0.006468321 | 0.0345089   |
| 1370058_at   | neurofilament, light polypeptide                                                           | Nefl                       | 0.6 | 0.006480315 | 0.034516914 |
| 1373483_at   | ankyrin repeat domain 47 (predicted)                                                       | Ankrd47_predicte<br>d      | 0.7 | 0.006510593 | 0.034645428 |
| 1387652_at   | insulin degrading enzyme                                                                   | Ide                        | 0.7 | 0.006510762 | 0.034645428 |
| 1383933_at   | Similar to KIAA0564 protein (predicted)                                                    | RGD1308772_pre<br>dicted   | 0.6 | 0.006527478 | 0.034691842 |
| 1385025_a_at | G protein-coupled receptor 137B (predicted)                                                | Gpr137b_predicte<br>d      | 0.5 | 0.006549688 | 0.03472897  |
| 1389471_at   | translocase of outer mitochondrial membrane 34 (predicted)                                 | Tomm34_predicte<br>d       | 0.7 | 0.00657122  | 0.034792246 |
| 1392932_at   | leukocyte receptor cluster (LRC) member 8                                                  | Leng8                      | 0.5 | 0.006572198 | 0.034792246 |
| 1372074_at   | nudix (nucleotide diphosphate linked moiety X)-type motif 3                                | Nudt3                      | 0.5 | 0.006578208 | 0.034801664 |
| 1368391_at   | solute carrier family 7 (cationic amino acid transporter, y <sup>+</sup> system), member 1 | Slc7a1                     | 0.7 | 0.006593216 | 0.034858634 |
| 1382479_at   | leucine rich repeat containing 4C (predicted)                                              | Lrrc4c_predicted           | 0.7 | 0.006619708 | 0.034931332 |
| 1373118_at   | similar to Protein KIAA1543                                                                | LOC682941 ///<br>LOC689074 | 0.6 | 0.006639973 | 0.035027031 |
| 1380741_at   | Transcribed locus                                                                          | ---                        | 0.6 | 0.006642636 | 0.03502984  |
| 1389491_at   | Transcribed locus                                                                          | ---                        | 0.6 | 0.006657121 | 0.03508373  |
| 1382280_at   | ubiquinol cytochrome c reductase core protein 2                                            | Uqcrc2                     | 0.7 | 0.006677168 | 0.035155588 |
| 1387367_at   | golgi apparatus protein 1                                                                  | Glg1                       | 0.5 | 0.006714403 | 0.035307499 |
| 1386259_a_at | similar to RIKEN cDNA 1110008J03 (predicted)                                               | RGD1306772_pre<br>dicted   | 0.7 | 0.006714607 | 0.035307499 |
| 1367823_at   | tissue inhibitor of metalloproteinase 2                                                    | Timp2                      | 0.6 | 0.006725763 | 0.035354859 |
| 1393554_at   | similar to hypothetical protein DKFZp761E198 (predicted)                                   | RGD1562657_pre<br>dicted   | 0.8 | 0.006743692 | 0.035426461 |
| 1398942_at   | CDNA clone MGC:95041 IMAGE:7123253                                                         | ---                        | 0.6 | 0.006763619 | 0.035485809 |
| 1367648_at   | insulin-like growth factor binding protein 2                                               | Igfbp2                     | 0.5 | 0.006784947 | 0.035559091 |
| 1371343_at   | signal recognition particle receptor ('docking protein')                                   | Srpr                       | 0.8 | 0.006786235 | 0.035559091 |
| 1382537_at   | Ras-related GTP binding C (predicted)                                                      | Rragc_predicted            | 0.3 | 0.006794807 | 0.035579749 |
| 1371254_at   | ubiquinol-cytochrome c reductase, Rieske iron-sulfur polypeptide 1                         | Uqcrcs1                    | 0.6 | 0.006796667 | 0.035579749 |
| 1369061_at   | glutathione reductase                                                                      | Gsr                        | 0.5 | 0.006807253 | 0.035605435 |
| 1389388_at   | Transcribed locus                                                                          | ---                        | 0.6 | 0.00682997  | 0.035631654 |
| 1372966_at   | hypothetical LOC298504 (predicted)                                                         | RGD1310174_pre<br>dicted   | 0.4 | 0.006830822 | 0.035631654 |
| 1376626_at   | similar to Mkrn1 protein                                                                   | MGC94941                   | 0.6 | 0.006846201 | 0.035670832 |
| 1392077_at   | Transcribed locus                                                                          | ---                        | 0.6 | 0.006846596 | 0.035670832 |

|              |                                                                                                   |                         |     |             |             |
|--------------|---------------------------------------------------------------------------------------------------|-------------------------|-----|-------------|-------------|
| 1390254_at   | Transcribed locus                                                                                 | ---                     | 0.8 | 0.006885374 | 0.035837922 |
| 1395354_at   | IanC (bacterial lantibiotic synthetase component C)-like 1                                        | LancI1                  | 0.3 | 0.006887383 | 0.035837922 |
| 1377646_at   | Transcribed locus                                                                                 | ---                     | 0.6 | 0.006903863 | 0.035912317 |
| 1378131_at   | similar to solute carrier family 9 (sodium/hydrogen exchanger), isoform 9 (predicted)             | RGD1560736_predicted    | 0.5 | 0.006915151 | 0.035927296 |
| 1390114_at   | myelin protein zero-like 1                                                                        | Mpzl1                   | 0.6 | 0.006929001 | 0.035952115 |
| 1377791_at   | Ras-related GTP binding B                                                                         | RragB                   | 0.7 | 0.00693335  | 0.035963336 |
| 1393096_at   | ---                                                                                               | ---                     | 0.8 | 0.006943829 | 0.035983648 |
| 1374176_at   | similar to DNA segment, Chr 4, Brigham & Womens Genetics 0951 expressed                           | RGD1308059              | 0.5 | 0.006975039 | 0.036134    |
| 1389605_at   | multiple coiled-coil GABABR1-binding protein                                                      | MGC125215               | 0.6 | 0.007003206 | 0.036230857 |
| 1379911_at   | death associated protein kinase 1 (predicted)                                                     | Dapk1_predicted         | 0.7 | 0.007011354 | 0.036253614 |
| 1387003_at   | leucine zipper protein 1                                                                          | Luzp1                   | 0.6 | 0.007035685 | 0.03634917  |
| 1376933_at   | Transcribed locus                                                                                 | ---                     | 0.7 | 0.007036464 | 0.03634917  |
| 1374116_at   | Similar to Metaxin 1, isoform 2                                                                   | LOC295241               | 0.6 | 0.00704256  | 0.036369238 |
| 1388652_at   | Transcribed locus                                                                                 | ---                     | 0.7 | 0.007056002 | 0.036394374 |
| 1376463_at   | Transcribed locus                                                                                 | ---                     | 0.6 | 0.007060045 | 0.03639899  |
| 1384001_at   | Transcribed locus                                                                                 | ---                     | 0.4 | 0.00707217  | 0.036430648 |
| 1377392_at   | Transcribed locus                                                                                 | ---                     | 0.6 | 0.007118204 | 0.0366219   |
| 1379109_at   | ---                                                                                               | ---                     | 0.5 | 0.007144433 | 0.036709105 |
| 1377890_at   | Transcribed locus                                                                                 | ---                     | 0.6 | 0.007146241 | 0.036709105 |
| 1369090_at   | protein kinase, cGMP-dependent, type II                                                           | Prkg2                   | 0.6 | 0.007146313 | 0.036709105 |
| 1384247_at   | Transcribed locus                                                                                 | ---                     | 0.6 | 0.00715214  | 0.036716103 |
| 1374592_at   | similar to BTB/POZ domain containing protein 6                                                    | LOC684566               | 0.6 | 0.007156375 | 0.03672408  |
| 1376885_at   | Transcribed locus                                                                                 | ---                     | 0.7 | 0.007158159 | 0.03672408  |
| 1373605_at   | Similar to 106 kDa O-GlcNAc transferase-interacting protein (predicted)                           | RGD1307844_predicted    | 0.6 | 0.007169849 | 0.036772582 |
| 1374741_at   | ---                                                                                               | ---                     | 0.7 | 0.0071918   | 0.03683618  |
| 1384538_at   | misato homolog 1 (Drosophila) (predicted)                                                         | Msto1_predicted         | 0.6 | 0.007193565 | 0.03683618  |
| 1385663_at   | ubiquitin specific protease 13 (isopeptidase T-3) (predicted)                                     | Usp13_predicted         | 0.6 | 0.007195686 | 0.03683618  |
| 1391111_at   | Transcribed locus                                                                                 | ---                     | 0.7 | 0.007264265 | 0.037117936 |
| 1370268_at   | potassium voltage-gated channel, shaker-related subfamily, member 5                               | Kcna5                   | 0.6 | 0.007282968 | 0.037178849 |
| 1377860_at   | similar to hypothetical protein FLJ33868 (predicted)                                              | RGD1305797_predicted    | 0.7 | 0.007297658 | 0.037242286 |
| 1372131_at   | ubiquilin 2 (predicted)                                                                           | Ubln2_predicted         | 0.7 | 0.00730518  | 0.037269105 |
| 1393635_x_at | tubulin, beta 4                                                                                   | Tubb4                   | 0.6 | 0.007330085 | 0.037361399 |
| 1385074_at   | SWI/SNF related, matrix associated, actin dependent regulator of chromatin, subfamily a, member 2 | Smarca2                 | 0.7 | 0.007344884 | 0.037407054 |
| 1389677_at   | synapse defective 1, Rho GTPase, homolog 1 (C. elegans) (predicted)                               | Syde1_predicted         | 0.7 | 0.007345865 | 0.037407054 |
| 1377770_at   | Transcribed locus                                                                                 | ---                     | 0.6 | 0.007369992 | 0.0375183   |
| 1374026_at   | similar to zinc finger protein 341                                                                | LOC296300               | 0.7 | 0.007409731 | 0.037673959 |
| 1387175_a_at | HLA-B-associated transcript 3                                                                     | Bat3                    | 0.6 | 0.007419834 | 0.037705144 |
| 1367789_at   | solute carrier family 27 (fatty acid transporter), member 1                                       | Slc27a1                 | 0.7 | 0.007446975 | 0.03780489  |
| 1371424_at   | similar to RIKEN cDNA 3110005O21                                                                  | RGD1304823              | 0.7 | 0.007455468 | 0.037814869 |
| 1373478_at   | Myosin binding protein H                                                                          | Mybph                   | 0.5 | 0.007455838 | 0.037814869 |
| 1375674_at   | similar to chromosome 16 open reading frame 5                                                     | RGD1310686              | 0.7 | 0.007460265 | 0.037825661 |
| 1367999_at   | aldehyde dehydrogenase 2                                                                          | Aldh2                   | 0.6 | 0.007466011 | 0.037831467 |
| 1375140_at   | similar to muscleblind-like 1 isoform d                                                           | LOC686892               | 0.2 | 0.007483524 | 0.037896863 |
| 1383444_at   | solute carrier family 24 (sodium/potassium/calcium exchanger), member 2                           | Slc24a2                 | 0.7 | 0.007556001 | 0.038193331 |
| 1369756_a_at | solute carrier family 4, member 4                                                                 | Slc4a4                  | 0.7 | 0.007589133 | 0.03831371  |
| 1374142_at   | similar to RIKEN cDNA E130201N16 (predicted)                                                      | RGD1311589_predicted    | 0.7 | 0.007603578 | 0.038374855 |
| 1388125_a_at | kinesin light chain 1                                                                             | Klc1                    | 0.3 | 0.007631286 | 0.038432148 |
| 1389561_at   | similar to RIKEN cDNA 1810021J13                                                                  | RGD1311364              | 0.6 | 0.007633628 | 0.038432177 |
| 1378629_at   | special AT-rich sequence binding protein 1                                                        | Satb1                   | 0.6 | 0.007655038 | 0.038501439 |
| 1376213_at   | similar to Rap2-binding protein 9                                                                 | LOC682723 /// MGC124740 | 0.7 | 0.007656749 | 0.038501439 |
| 1388078_a_at | amiloride-sensitive cation channel 2, neuronal                                                    | Accn2                   | 0.4 | 0.007663043 | 0.038521309 |



|              |                                                                                                                                                                                                                                              |                      |     |             |             |
|--------------|----------------------------------------------------------------------------------------------------------------------------------------------------------------------------------------------------------------------------------------------|----------------------|-----|-------------|-------------|
| 1388193_at   | huntingtin interacting protein 1                                                                                                                                                                                                             | Hip1                 | 0.7 | 0.007687163 | 0.038607162 |
| 1384069_at   | low density lipoprotein receptor-related protein 11 (predicted)                                                                                                                                                                              | Lrp11_predicted      | 0.7 | 0.007692534 | 0.038622342 |
| 1398424_at   | Transcribed locus                                                                                                                                                                                                                            | ---                  | 0.6 | 0.007744976 | 0.038858566 |
| 1391213_at   | protein phosphatase 3, regulatory subunit B, alpha isoform (calcineurin B, type I) /// similar to Calcineurin subunit B isoform 1 (Protein phosphatase 2B regulatory subunit 1) (Protein phosphatase 3 regulatory subunit B alpha isoform 1) | LOC300429 /// Ppp3r1 | 0.7 | 0.007746671 | 0.038858566 |
| 1388336_at   | similar to hypothetical protein D2Ertd391e (predicted)                                                                                                                                                                                       | RGD1310685_predicted | 0.6 | 0.007751661 | 0.038871745 |
| 1393825_at   | guanine nucleotide binding protein, alpha 14                                                                                                                                                                                                 | Gna14                | 0.4 | 0.007773402 | 0.038957012 |
| 1369847_at   | potassium voltage-gated channel, shaker-related subfamily, beta member 1                                                                                                                                                                     | Kcnab1               | 0.5 | 0.007779407 | 0.03897523  |
| 1388582_at   | proteasome (prosome, macropain) 28 subunit, 3                                                                                                                                                                                                | Psme3                | 0.5 | 0.007802019 | 0.039044564 |
| 1367756_at   | G elongation factor                                                                                                                                                                                                                          | Gfm                  | 0.7 | 0.007834314 | 0.039142381 |
| 1368065_at   | GPC PDZ domain containing family, member 1                                                                                                                                                                                                   | Gipc1                | 0.5 | 0.007852492 | 0.039198114 |
| 1389335_at   | WD repeat domain 22                                                                                                                                                                                                                          | Wdr22                | 0.6 | 0.007856688 | 0.039207163 |
| 1398624_x_at | tubulin, beta 4                                                                                                                                                                                                                              | Tubb4                | 0.5 | 0.007863364 | 0.039228574 |
| 1394395_at   | Transcribed locus                                                                                                                                                                                                                            | ---                  | 0.6 | 0.007894088 | 0.039357977 |
| 1390552_at   | membrane associated guanylate kinase 1 b NT-short isoform                                                                                                                                                                                    | LOC500261            | 0.6 | 0.007929024 | 0.039484285 |
| 1388366_at   | mitochondrial ribosomal protein L4 (predicted)                                                                                                                                                                                               | Mrp14_predicted      | 0.8 | 0.007951586 | 0.039572674 |
| 1383903_at   | ST8 alpha-N-acetyl-neuraminide alpha-2,8-sialyltransferase 5                                                                                                                                                                                 | St8sia5              | 0.7 | 0.007958556 | 0.039594786 |
| 1382451_at   | heme binding protein 2 (predicted)                                                                                                                                                                                                           | Hebp2_predicted      | 0.6 | 0.007960844 | 0.039594786 |
| 1388588_at   | mammary tumor virus receptor 2                                                                                                                                                                                                               | Mtvr2                | 0.5 | 0.007972528 | 0.039640913 |
| 1394931_at   | similar to muscleblind-like 1 isoform d                                                                                                                                                                                                      | LOC686892            | 0.4 | 0.007977533 | 0.039653813 |
| 1370066_at   | Kelch-like ECH-associated protein 1                                                                                                                                                                                                          | Keap1                | 0.6 | 0.00798901  | 0.039684349 |
| 1386023_at   | leucine-rich repeat LGI family, member 1                                                                                                                                                                                                     | Lgi1                 | 0.6 | 0.007990915 | 0.039684349 |
| 1379913_at   | ubiquitin specific protease 13 (isopeptidase T-3) (predicted)                                                                                                                                                                                | Usp13_predicted      | 0.6 | 0.00800546  | 0.039720606 |
| 1396512_at   | Transcribed locus                                                                                                                                                                                                                            | ---                  | 0.5 | 0.008017582 | 0.039756765 |
| 1380072_at   | similar to 2310044H10Rik protein                                                                                                                                                                                                             | MGC93975             | 0.6 | 0.008057294 | 0.039881545 |
| 1368069_at   | SHANK-associated RH domain interacting protein                                                                                                                                                                                               | Sharpin              | 0.6 | 0.008063156 | 0.039898552 |
| 1372261_at   | Transcribed locus                                                                                                                                                                                                                            | ---                  | 0.7 | 0.008069587 | 0.039918366 |
| 1383229_at   | ATP-binding cassette, sub-family A (ABC1), member 7                                                                                                                                                                                          | Abca7                | 0.5 | 0.008082444 | 0.039969948 |
| 1367889_at   | calcium/calmodulin-dependent protein kinase I                                                                                                                                                                                                | Camk1                | 0.7 | 0.00809804  | 0.040010982 |
| 1376872_at   | plexin C1 (predicted)                                                                                                                                                                                                                        | Plxnc1_predicted     | 0.7 | 0.008131971 | 0.040154505 |
| 1376907_at   | Microtubule-associated protein 6                                                                                                                                                                                                             | Mtap6                | 0.7 | 0.008136738 | 0.040165985 |
| 1390597_at   | Transcribed locus                                                                                                                                                                                                                            | ---                  | 0.7 | 0.008144726 | 0.040193357 |
| 1373422_at   | La ribonucleoprotein domain family, member 1 (predicted)                                                                                                                                                                                     | Larp1_predicted      | 0.5 | 0.008166969 | 0.040266877 |
| 1383302_at   | DnaJ (Hsp40) homolog, subfamily B, member 1 (predicted)                                                                                                                                                                                      | Dnajb1_predicted     | 0.6 | 0.008180821 | 0.040311007 |
| 1394430_at   | Transcribed locus                                                                                                                                                                                                                            | ---                  | 0.6 | 0.008201547 | 0.040377359 |
| 1369046_at   | synaptotagmin VI                                                                                                                                                                                                                             | Syt6                 | 0.4 | 0.008203363 | 0.040377359 |
| 1388584_at   | Transcribed locus                                                                                                                                                                                                                            | ---                  | 0.7 | 0.008204106 | 0.040377359 |
| 1387057_at   | solute carrier family 7 (cationic amino acid transporter, y+ system), member 8 /// synaptic Ras GTPase activating protein 1 homolog (rat)                                                                                                    | Slc7a8 /// Syngap1   | 0.7 | 0.008224015 | 0.040451134 |
| 1378818_at   | Transcribed locus                                                                                                                                                                                                                            | ---                  | 0.5 | 0.008227069 | 0.04045406  |
| 1368035_a_at | protein tyrosine phosphatase, receptor type, F                                                                                                                                                                                               | Ptpnf                | 0.7 | 0.008231472 | 0.040463616 |
| 1380648_at   | Mitogen activated protein kinase 10                                                                                                                                                                                                          | Mapk10               | 0.7 | 0.008241912 | 0.040502827 |
| 1386988_at   | deformed epidermal autoregulatory factor 1 (Drosophila)                                                                                                                                                                                      | Deaf1                | 0.5 | 0.008254908 | 0.040534945 |
| 1383765_at   | similar to RIKEN cDNA 4921520P21                                                                                                                                                                                                             | MGC114388            | 0.5 | 0.00825617  | 0.040534945 |
| 1373637_at   | ---                                                                                                                                                                                                                                          | ---                  | 0.6 | 0.008257817 | 0.040534945 |
| 1388690_at   | breast cancer metastasis-suppressor 1-like (predicted)                                                                                                                                                                                       | Brms1l_predicted     | 0.7 | 0.008260095 | 0.040534945 |
| 1393143_at   | Transcribed locus                                                                                                                                                                                                                            | ---                  | 0.7 | 0.008278415 | 0.040609417 |
| 1387132_at   | lipase, hormone sensitive                                                                                                                                                                                                                    | Lipe                 | 0.7 | 0.008284301 | 0.040626175 |
| 1389420_at   | signal-transducing adaptor protein-2                                                                                                                                                                                                         | Stap2                | 0.7 | 0.00829298  | 0.040656613 |

|                           |                                                                                  |                              |     |             |             |
|---------------------------|----------------------------------------------------------------------------------|------------------------------|-----|-------------|-------------|
| 1389128_at                | WD repeat and FYVE domain containing 3 (predicted)                               | Wdfy3_predicted              | 0.6 | 0.008302503 | 0.040666938 |
| 1385836_at                | ---                                                                              | ---                          | 0.7 | 0.008343559 | 0.040843706 |
| 1376637_at                | Transcribed locus                                                                | ---                          | 0.7 | 0.008354379 | 0.040884507 |
| 1369666_at                | Glycerol-3-phosphate dehydrate dehydrogenase (mtGPDH) mRNA, 3'UTR, mRNA sequence | ---                          | 0.7 | 0.008380523 | 0.04098806  |
| 1394957_at                | nischarin                                                                        | Nisch                        | 0.4 | 0.008401102 | 0.041042234 |
| 1395817_at                | Transcribed locus                                                                | ---                          | 0.5 | 0.008401581 | 0.041042234 |
| 1388593_at                | mitogen-activated protein kinase 8 interacting protein 3                         | Mapk8ip3                     | 0.7 | 0.008404438 | 0.041044001 |
| 1389185_at                | Adenylate kinase 1                                                               | Ak1                          | 0.5 | 0.008409589 | 0.041056967 |
| 1381158_at                | speedy homolog 1 (Drosophila)                                                    | Spdy1                        | 0.6 | 0.008420649 | 0.041086571 |
| 1392518_at                | similar to Protein C22orf5                                                       | RGD1306591                   | 0.7 | 0.008423921 | 0.041090347 |
| 1370158_at                | myosin, heavy polypeptide 10, non-muscle                                         | Myh10                        | 0.8 | 0.008437521 | 0.041132289 |
| 1394590_at                | NFKB inhibitor interacting Ras-like protein 1 (predicted)                        | Nkiras1_predicted            | 0.6 | 0.008458446 | 0.041209231 |
| 1394567_at                | ---                                                                              | ---                          | 0.7 | 0.00846082  | 0.041209231 |
| 1392161_at                | ATP synthase mitochondrial F1 complex assembly factor 1 (predicted)              | Atpaf1_predicted             | 0.6 | 0.008464295 | 0.041213948 |
| 1390437_at                | Transcribed locus                                                                | ---                          | 0.5 | 0.008503249 | 0.041330212 |
| 1388121_at                | amyloid beta (A4) precursor-like protein 2                                       | Aplp2                        | 0.3 | 0.008578469 | 0.041609748 |
| 1379325_at                | ---                                                                              | ---                          | 0.6 | 0.008589172 | 0.041637106 |
| 1374681_at                | Transcribed locus                                                                | ---                          | 0.7 | 0.008594469 | 0.041643841 |
| 1367876_at                | importin 13                                                                      | Ipo13                        | 0.5 | 0.008596885 | 0.041643841 |
| 1388888_at                | ---                                                                              | ---                          | 0.8 | 0.008600689 | 0.041643841 |
| 1382555_at                | Transcribed locus                                                                | ---                          | 0.7 | 0.008633207 | 0.041764409 |
| 1376654_at                | similar to RIKEN cDNA B130016O10 gene (predicted)                                | RGD1308448_predicted         | 0.7 | 0.008660788 | 0.041860901 |
| 1382331_at                | similar to RIKEN cDNA 0610038L10 gene (predicted) /// riboflavin kinase          | Rfk /// RGD1560961_predicted | 0.4 | 0.008678247 | 0.041920647 |
| 1390818_at                | Transcribed locus                                                                | ---                          | 0.7 | 0.008685443 | 0.041930778 |
| 1370823_at                | BMP and activin membrane-bound inhibitor, homolog (Xenopus laevis)               | Bambi                        | 0.5 | 0.008726366 | 0.042075245 |
| 1382265_at                | similar to KIAA1128 protein (predicted)                                          | RGD1304626_predicted         | 0.7 | 0.008737244 | 0.042104871 |
| 1370821_at                | similar to Thiopurine S-methyltransferase (Thiopurine methyltransferase)         | LOC681730                    | 0.8 | 0.008739423 | 0.042104871 |
| 1376388_at                | Peroxin 2                                                                        | Pex2                         | 0.7 | 0.008742675 | 0.042105866 |
| AFFX_Rat_Hexohexokinase 1 | hexokinase 1                                                                     | Hk1                          | 0.5 | 0.008744749 | 0.042105866 |
| 1377650_at                | Transcribed locus                                                                | ---                          | 0.7 | 0.008770973 | 0.042170407 |
| 1385675_at                | Transcribed locus                                                                | ---                          | 0.8 | 0.008782254 | 0.04220454  |
| 1397644_at                | ---                                                                              | ---                          | 0.7 | 0.008783204 | 0.04220454  |
| 1388196_at                | NCK-associated protein 1                                                         | Nckap1                       | 0.7 | 0.008810618 | 0.042286853 |
| 1393063_at                | Transcribed locus                                                                | ---                          | 0.7 | 0.008819308 | 0.042316213 |
| 1374187_at                | ---                                                                              | ---                          | 0.7 | 0.008829429 | 0.042340072 |
| 1371526_at                | ring finger protein 10                                                           | Rnf10                        | 0.7 | 0.008836594 | 0.042362079 |
| 1379566_at                | RNA binding motif protein 11 (predicted)                                         | Rbm11_predicted              | 0.6 | 0.008868987 | 0.042468038 |
| 1390546_at                | ---                                                                              | ---                          | 0.8 | 0.008876318 | 0.042472133 |
| 1367909_at                | dicarbonyl L-xylulose reductase                                                  | Dcxr                         | 0.5 | 0.008877626 | 0.042472133 |
| 1368156_at                | calcium/calmodulin-dependent protein kinase kinase 1, alpha                      | Camkk1                       | 0.4 | 0.008921765 | 0.042621316 |
| 1374832_at                | Transcribed locus                                                                | ---                          | 0.6 | 0.008956135 | 0.042760672 |
| 1388811_at                | Synapsin II                                                                      | Syn2                         | 0.7 | 0.008978349 | 0.042812374 |
| 1390954_at                | protein phosphatase 1H (PP2C domain containing)                                  | Ppm1h                        | 0.7 | 0.008982582 | 0.042812374 |
| 1370616_at                | neuregulin 1                                                                     | Nrg1                         | 0.7 | 0.008989051 | 0.042818392 |
| 1368086_a_at              | lanosterol synthase                                                              | Lss                          | 0.5 | 0.009025018 | 0.042968139 |
| 1371650_at                | SUMO/sentrin specific peptidase 3                                                | Senp3                        | 0.8 | 0.009025713 | 0.042968139 |
| 1384128_at                | glycine-, glutamate-, thienylcyclohexylpiperidine-binding protein                | LOC246295                    | 0.7 | 0.009046586 | 0.043030144 |
| 1378152_at                | Transcribed locus                                                                | ---                          | 0.7 | 0.009059045 | 0.043076952 |
| 1373084_at                | WD repeat domain 20                                                              | Wdr20                        | 0.7 | 0.009067285 | 0.043097779 |
| 1376171_at                | ubiquitin specific protease 11                                                   | Usp11                        | 0.7 | 0.009068666 | 0.043097779 |
| 1393983_at                | exportin, tRNA (nuclear export receptor for tRNAs) (predicted)                   | Xpot_predicted               | 0.7 | 0.009082373 | 0.043137994 |
| 1371023_at                | EGF-like-domain, multiple 4                                                      | Egfl4                        | 0.7 | 0.009088168 | 0.043153057 |
| 1372049_at                | similar to RIKEN cDNA 5730411O18 gene                                            | RGD1311827                   | 0.6 | 0.009098693 | 0.043167739 |

|              |                                                                                                                                   |                         |     |             |             |
|--------------|-----------------------------------------------------------------------------------------------------------------------------------|-------------------------|-----|-------------|-------------|
| 1390951_at   | Transcribed locus                                                                                                                 | ---                     | 0.7 | 0.009101367 | 0.043167739 |
| 1367493_at   | similar to DNA segment, Chr 18, Wayne State University 98, expressed (predicted)                                                  | RGD1560212_predicted    | 0.6 | 0.009101758 | 0.043167739 |
| 1376202_at   | UDP-GlcNAc:betaGal beta-1,3-N-acetylglucosaminyltransferase 6 (predicted)                                                         | B3gnt6_predicted        | 0.5 | 0.009113117 | 0.043208808 |
| 1371748_at   | 1-acylglycerol-3-phosphate O-acyltransferase 1                                                                                    | Agpat1                  | 0.5 | 0.009124778 | 0.043227059 |
| 1389514_at   | leucine rich repeat neuronal 6A                                                                                                   | Lrrn6a                  | 0.4 | 0.009149641 | 0.043319887 |
| 1390864_at   | Transcribed locus                                                                                                                 | ---                     | 0.7 | 0.009167651 | 0.043373062 |
| 1384862_at   | Transcribed locus                                                                                                                 | ---                     | 0.6 | 0.009168958 | 0.043373062 |
| 1382137_at   | abhydrolase domain containing 3 (predicted)                                                                                       | Abhd3_predicted         | 0.7 | 0.009173031 | 0.043373062 |
| 1376402_a_at | RAS-like, family 10, member B (predicted)                                                                                         | Ras10b_predicted        | 0.8 | 0.009184309 | 0.043394069 |
| 1392210_at   | similar to mKIAA0319 protein (predicted)                                                                                          | RGD1307443_predicted    | 0.5 | 0.009186415 | 0.043394069 |
| 1387521_at   | programmed cell death 4                                                                                                           | Pdcd4                   | 0.5 | 0.009198143 | 0.043424528 |
| 1376668_at   | similar to RIKEN cDNA 4922503N01 (predicted)                                                                                      | RGD1311126_predicted    | 0.6 | 0.009248968 | 0.043618941 |
| 1374960_at   | similar to 9130011E15Rik protein (predicted)                                                                                      | RGD1564887_predicted    | 0.7 | 0.009249931 | 0.043618941 |
| 1383593_at   | Transcribed locus                                                                                                                 | ---                     | 0.7 | 0.009265955 | 0.043663038 |
| 1384190_at   | mitogen-activated protein kinase 8 interacting protein 3                                                                          | Mapk8ip3                | 0.4 | 0.009272556 | 0.043663038 |
| 1372381_at   | Transcribed locus                                                                                                                 | ---                     | 0.7 | 0.009280902 | 0.043689833 |
| 1371602_at   | tetraspanin 9 (predicted)                                                                                                         | Tspan9_predicted        | 0.8 | 0.009300963 | 0.043771741 |
| 1381176_at   | Transcribed locus                                                                                                                 | ---                     | 0.7 | 0.009315226 | 0.043813793 |
| 1370409_at   | solute carrier family 38, member 1                                                                                                | Slc38a1                 | 0.7 | 0.009330382 | 0.043869372 |
| 1385758_at   | SAPS domain family, member 1 (predicted)                                                                                          | Saps1_predicted         | 0.7 | 0.009333399 | 0.043869372 |
| 1372580_at   | MAP-kinase activating death domain                                                                                                | Madd                    | 0.6 | 0.009368653 | 0.04399369  |
| 1373278_at   | nuclear factor, erythroid derived 2,-like 1 (predicted)                                                                           | Nfe2l1_predicted        | 0.7 | 0.00939518  | 0.044086734 |
| 1367762_at   | somatostatin                                                                                                                      | Sst                     | 0.4 | 0.009411286 | 0.044139389 |
| 1373503_at   | leucine-rich repeats and calponin homology (CH) domain containing 4 (predicted)                                                   | Lrch4_predicted         | 0.7 | 0.009414993 | 0.044144184 |
| 1367467_at   | similar to nitrogen fixation cluster-like (predicted)                                                                             | RGD1309562_predicted    | 0.5 | 0.009421433 | 0.044161791 |
| 1389464_at   | ligand of numb-protein X 1 (predicted)                                                                                            | Lnx1_predicted          | 0.7 | 0.009436336 | 0.044193866 |
| 1398297_at   | mitogen-activated protein kinase 12                                                                                               | Mapk12                  | 0.5 | 0.009440996 | 0.044203103 |
| 1372521_at   | Rho family GTPase 2                                                                                                               | Rnd2                    | 0.7 | 0.009477515 | 0.044351429 |
| 1369428_a_at | 5-hydroxytryptamine (serotonin) receptor 3a                                                                                       | Htr3a                   | 0.3 | 0.009480106 | 0.044351429 |
| 1370556_at   | vesicle-associated membrane protein 1                                                                                             | Vamp1                   | 0.2 | 0.009480765 | 0.044351429 |
| 1376680_at   | ---                                                                                                                               | ---                     | 0.7 | 0.009489652 | 0.044380381 |
| 1381812_at   | Transcribed locus                                                                                                                 | ---                     | 0.7 | 0.009504123 | 0.044422794 |
| 1389735_at   | ribosomal protein S6 kinase polypeptide 6 (predicted)                                                                             | Rps6ka6_predicted       | 0.7 | 0.009508505 | 0.04443065  |
| 1376233_at   | Discs, large (Drosophila) homolog-associated protein 3                                                                            | Dlgap3                  | 0.6 | 0.009517942 | 0.044462117 |
| 1370335_at   | disabled homolog 2 (Drosophila) interacting protein                                                                               | Dab2ip                  | 0.7 | 0.009522395 | 0.044470286 |
| 1367894_at   | similar to Insulin-induced gene 1 protein (INSIG-1) (Insulin-induced growth response protein CL-6) (Immediate-early protein CL-6) | LOC683385 /// LOC688922 | 0.6 | 0.009542923 | 0.044528227 |
| 1369562_at   | hippocalcin-like 1                                                                                                                | Hpcal1                  | 0.5 | 0.009560847 | 0.044599211 |
| 1386959_a_at | mitogen activated protein kinase kinase 5                                                                                         | Map2k5                  | 0.7 | 0.009577879 | 0.044638549 |
| 1388037_at   | ATPase, Ca++ transporting, plasma membrane 3                                                                                      | Atp2b3                  | 0.5 | 0.009580083 | 0.044638549 |
| 1379545_at   | Transcribed locus                                                                                                                 | ---                     | 0.7 | 0.009592291 | 0.044657231 |
| 1379091_at   | similar to D8ErtD354e protein (predicted)                                                                                         | RGD1560755_predicted    | 0.6 | 0.009681328 | 0.044998439 |
| 1389171_at   | transmembrane protein 38a (predicted)                                                                                             | Tmem38a_predicted       | 0.5 | 0.009686685 | 0.044998439 |
| 1383451_at   | WD repeat and SOCS box-containing 2                                                                                               | Wsb2                    | 0.6 | 0.009690204 | 0.044998439 |
| 1392974_at   | WAS protein family, member 1                                                                                                      | Wasf1                   | 0.7 | 0.009704193 | 0.045044077 |
| 1383669_at   | ---                                                                                                                               | ---                     | 0.8 | 0.009705509 | 0.045044077 |
| 1377526_at   | sorting nexin family member 27                                                                                                    | Snx27                   | 0.5 | 0.009715726 | 0.045066065 |
| 1384315_at   | pyruvate dehydrogenase kinase, isoenzyme 3                                                                                        | Pdk3                    | 0.5 | 0.009720056 | 0.045073438 |
| 1383224_at   | ---                                                                                                                               | ---                     | 0.8 | 0.009726747 | 0.045083819 |

|              |                                                                                       |                            |     |             |             |
|--------------|---------------------------------------------------------------------------------------|----------------------------|-----|-------------|-------------|
| 1394264_at   | similar to N-acetylglucosamine 6-O-sulfotransferase (predicted)                       | RGD1561144_predicted       | 0.6 | 0.009728068 | 0.045083819 |
| 1390854_at   | transmembrane protein 24                                                              | Tmem24                     | 0.7 | 0.009731635 | 0.045083819 |
| 1388341_at   | RAN GTPase activating protein 1                                                       | Rangap1                    | 0.5 | 0.00974435  | 0.045108804 |
| 1368476_at   | nuclear receptor subfamily 3, group C, member 2                                       | Nr3c2                      | 0.7 | 0.009753677 | 0.045127563 |
| 1398343_at   | similar to DnaJ (Hsp40) homolog, subfamily A, member 4                                | LOC498996                  | 0.6 | 0.009787897 | 0.045260425 |
| 1388600_at   | CDNA clone IMAGE:7320582                                                              | ---                        | 0.8 | 0.009820486 | 0.045372852 |
| 1382428_at   | taspase, threonine aspartase 1 (predicted)                                            | Tasp1_predicted            | 0.7 | 0.009829447 | 0.045388756 |
| 1391698_at   | microtubule associated serine/threonine kinase 1                                      | MAST1                      | 0.5 | 0.009838104 | 0.045415978 |
| 1394097_at   | Transcribed locus                                                                     | ---                        | 0.7 | 0.009892818 | 0.045579012 |
| 1386941_at   | plectin 1                                                                             | Plec1                      | 0.7 | 0.009918364 | 0.04568391  |
| 1388486_at   | dipeptidylpeptidase 8 (predicted)                                                     | Dpp8_predicted             | 0.6 | 0.009924772 | 0.045700628 |
| 1368994_a_at | GTPase activating RANGAP domain-like 1                                                | Garn1                      | 0.4 | 0.009931273 | 0.045717766 |
| 1381394_at   | sorting nexin family member 27                                                        | Snx27                      | 0.6 | 0.009952135 | 0.045786228 |
| 1376449_at   | ---                                                                                   | ---                        | 0.7 | 0.009954496 | 0.045786228 |
| 1374275_at   | carbonic anhydrase 11                                                                 | Car11                      | 0.6 | 0.00996423  | 0.045818187 |
| 1371584_at   | transient receptor potential cation channel, subfamily C, member 4 associated protein | Trpc4ap                    | 0.7 | 0.009997956 | 0.045947578 |
| 1376878_at   | similar to RIKEN cDNA 2310022B05 (predicted)                                          | RGD1559896_predicted       | 0.7 | 0.010003542 | 0.045960409 |
| 1388334_at   | similar to SEC14-like 1 (predicted)                                                   | RGD1563123_predicted       | 0.6 | 0.010007148 | 0.045964134 |
| 1368928_at   | tripartite motif protein 3                                                            | Trim3                      | 0.4 | 0.010069738 | 0.046174254 |
| 1372103_at   | similar to DnaJ (Hsp40) homolog, subfamily A, member 4                                | LOC498996                  | 0.6 | 0.010079882 | 0.046207886 |
| 1380013_at   | Transcribed locus                                                                     | ---                        | 0.7 | 0.010085923 | 0.046218199 |
| 1368309_at   | thioredoxin reductase 2                                                               | Txnrd2                     | 0.7 | 0.010100568 | 0.04623828  |
| 1390388_at   | ferrochelatase (predicted)                                                            | Fech_predicted             | 0.7 | 0.010118373 | 0.0463069   |
| 1384469_at   | ATP-binding cassette, sub-family A (ABC1), member 5                                   | Abca5                      | 0.5 | 0.010127523 | 0.046335881 |
| 1384656_at   | ---                                                                                   | ---                        | 0.7 | 0.010183946 | 0.046528792 |
| 1374120_at   | similar to KIAA1126 protein (predicted)                                               | RGD1309971_predicted       | 0.7 | 0.010192027 | 0.046540382 |
| 1387182_at   | G protein-coupled receptor 37                                                         | Gpr37                      | 0.6 | 0.010201562 | 0.046570993 |
| 1374483_at   | Transcribed locus                                                                     | ---                        | 0.8 | 0.010223406 | 0.046657713 |
| 1373752_at   | DEP domain containing 5 (predicted)                                                   | Depdc5_predicted           | 0.6 | 0.01023046  | 0.04666406  |
| 1392495_at   | similar to dJ202D23.2 (novel protein similar to C21ORF5 (KIAA0933)) (predicted)       | RGD1305534_predicted       | 0.7 | 0.010294199 | 0.046876796 |
| 1370030_at   | glutamate cysteine ligase, modifier subunit                                           | Gclm                       | 0.6 | 0.010297139 | 0.046877206 |
| 1372184_at   | similar to hypothetical protein BC011833 (predicted)                                  | RGD1309188_predicted       | 0.4 | 0.010314007 | 0.046941003 |
| 1393995_at   | Glutamate receptor, ionotropic, AMPA2                                                 | Gria2                      | 0.7 | 0.010383986 | 0.047181159 |
| 1388802_at   | brain expressed X-linked 1                                                            | Bex1                       | 0.6 | 0.010402591 | 0.047239595 |
| 1393133_at   | Transcribed locus                                                                     | ---                        | 0.6 | 0.010433509 | 0.047328547 |
| 1389426_at   | glutamate-ammonia ligase (glutamine synthase)                                         | Glul                       | 0.7 | 0.010451809 | 0.047384605 |
| 1378587_at   | similar to ankyrin repeat domain 40                                                   | LOC688144 ///<br>LOC690586 | 0.7 | 0.010470408 | 0.047442775 |
| 1373500_at   | leucine-rich PPR-motif containing                                                     | Lrpprc                     | 0.7 | 0.010561875 | 0.047765113 |
| 1375995_at   | similar to KIAA0528 protein (predicted)                                               | RGD1304592_predicted       | 0.8 | 0.010582665 | 0.047835009 |
| 1387771_a_at | mitogen activated protein kinase 3                                                    | Mapk3                      | 0.4 | 0.010587139 | 0.047835009 |
| 1370402_at   | EGF-like domain 7                                                                     | Egfl7                      | 0.7 | 0.01059636  | 0.047835009 |
| 1372572_at   | sialyltransferase 7F                                                                  | Siat7F                     | 0.6 | 0.010597688 | 0.047835009 |
| 1368034_at   | chromogranin B                                                                        | Chgb                       | 0.6 | 0.01062332  | 0.0479244   |
| 1384106_at   | transmembrane protein 23                                                              | Tmem23                     | 0.7 | 0.010629476 | 0.047925883 |
| 1398660_at   | Solute carrier family 35, member F2 (predicted)                                       | Slc35f2_predicted          | 0.7 | 0.010659642 | 0.048035559 |
| 1387155_at   | proprotein convertase subtilisin/kexin type 2                                         | Pcsk2                      | 0.5 | 0.01066753  | 0.048057939 |
| 1384903_at   | glutamic pyruvate transaminase (alanine aminotransferase) 2 (predicted)               | Gpt2_predicted             | 0.7 | 0.010706445 | 0.048159383 |
| 1397740_at   | sideroflexin 1                                                                        | Sfxn1                      | 0.6 | 0.010707642 | 0.048159383 |

|            |                                                                                                                                                          |                                                                  |     |             |             |
|------------|----------------------------------------------------------------------------------------------------------------------------------------------------------|------------------------------------------------------------------|-----|-------------|-------------|
| 1394637_at | Similar to Leucine-rich repeats and calponin homology domain-containing protein 1 (Calponin homology domain-containing protein 1)                        | LOC502020                                                        | 0.7 | 0.010721022 | 0.048193324 |
| 1374077_at | Phosphatidylserine synthase 1                                                                                                                            | Ptdss1                                                           | 0.7 | 0.010732898 | 0.048220352 |
| 1377331_at | Transcribed locus                                                                                                                                        | ---                                                              | 0.8 | 0.010818599 | 0.048486192 |
| 1387447_at | ADP-ribosylation factor 3                                                                                                                                | Arf3                                                             | 0.6 | 0.010873619 | 0.04865916  |
| 1374459_at | asparagine-linked glycosylation 2 homolog (yeast, alpha-1,3-mannosyltransferase)                                                                         | Alg2                                                             | 0.7 | 0.01087863  | 0.04865916  |
| 1367815_at | solute carrier family 5 (sodium-dependent vitamin transporter), member 6                                                                                 | Slc5a6                                                           | 0.6 | 0.01088086  | 0.04865916  |
| 1373019_at | Transcribed locus                                                                                                                                        | ---                                                              | 0.7 | 0.010946593 | 0.048873387 |
| 1395467_at | similar to N-copine /// similar to Copine-6 (Copine VI) (Neuronal-copine) (N-copine)                                                                     | LOC305894 ///<br>LOC691478                                       | 0.7 | 0.010966536 | 0.048924116 |
| 1367842_at | amyloid beta (A4) precursor protein-binding, family B, member 1                                                                                          | Apbb1                                                            | 0.5 | 0.010966878 | 0.048924116 |
| 1388898_at | heat shock 105kDa/110kDa protein 1                                                                                                                       | Hsph1                                                            | 0.5 | 0.010989885 | 0.04897362  |
| 1378555_at | Transcribed locus                                                                                                                                        | ---                                                              | 0.7 | 0.011004256 | 0.049000199 |
| 1380023_at | Transcribed locus                                                                                                                                        | ---                                                              | 0.8 | 0.011030563 | 0.049101677 |
| 1368138_at | microtubule-associated protein tau                                                                                                                       | Mapt                                                             | 0.7 | 0.011039745 | 0.049129256 |
| 1393072_at | ubiquitin-conjugating enzyme E2Q (putative) 2 (predicted)                                                                                                | Ube2q2_predicted                                                 | 0.6 | 0.011043382 | 0.049132148 |
| 1368978_at | scrapie responsive gene 1                                                                                                                                | Scrg1                                                            | 0.7 | 0.011086362 | 0.049283376 |
| 1382477_at | SUMO/sentrin specific protease 5 (predicted) /// similar to SUMO/sentrin specific protease 5 (predicted) /// similar to SUMO/sentrin specific protease 5 | LOC686286 ///<br>RGD1564247_pre<br>dicted ///<br>Senp5_predicted | 0.7 | 0.011091977 | 0.049295012 |
| 1395311_at | isoprenylcysteine carboxyl methyltransferase                                                                                                             | lcmt                                                             | 0.6 | 0.011118133 | 0.049360034 |
| 1367649_at | paralemmin                                                                                                                                               | Palm                                                             | 0.7 | 0.011118612 | 0.049360034 |
| 1395726_at | Transcribed locus                                                                                                                                        | ---                                                              | 0.4 | 0.011143323 | 0.049443048 |
| 1368807_at | reticulon 3                                                                                                                                              | Rtn3                                                             | 0.8 | 0.011152882 | 0.049445444 |
| 1368667_at | purinergic receptor P2X, ligand-gated ion channel, 3                                                                                                     | P2rx3                                                            | 0.6 | 0.011160518 | 0.049465967 |
| 1388396_at | serine/threonine kinase 25 (STE20 homolog, yeast)                                                                                                        | Stk25                                                            | 0.7 | 0.011251986 | 0.049790869 |
| 1379607_at | Transcribed locus                                                                                                                                        | ---                                                              | 0.7 | 0.01126657  | 0.049839752 |
| 1397824_at | similar to WAC (predicted)                                                                                                                               | RGD1562407_pre<br>dicted                                         | 0.7 | 0.011270627 | 0.049839752 |
| 1371819_at | histone deacetylase 5                                                                                                                                    | Hdac5                                                            | 0.6 | 0.011275072 | 0.049839752 |
| 1373602_at | leucyl-tRNA synthetase, mitochondrial (predicted)                                                                                                        | Lars2_predicted                                                  | 0.7 | 0.01128482  | 0.049864217 |
| 1389124_at | similar to ankyrin repeat domain 40                                                                                                                      | LOC688144 ///<br>LOC690586                                       | 0.7 | 0.011310519 | 0.049934837 |
| 1388653_at | similar to Paired amphipathic helix protein Sin3b (Transcriptional corepressor Sin3b) (Histone deacetylase complex subunit Sin3b)                        | LOC683381                                                        | 0.7 | 0.011312506 | 0.049934837 |
| 1391118_at | Transcribed locus                                                                                                                                        | ---                                                              | 0.5 | 0.011320748 | 0.049934837 |
| 1385826_at | Transcribed locus                                                                                                                                        | ---                                                              | 0.5 | 0.011331707 | 0.049942099 |
| 1371772_at | alkB, alkylation repair homolog 3 (E. coli)                                                                                                              | Alkbh3                                                           | 0.7 | 0.011350654 | 0.049998811 |
| 1373922_at | Transcribed locus                                                                                                                                        | ---                                                              | 0.7 | 0.011367391 | 0.050059128 |
| 1373211_at | F-box and WD-40 domain protein 4 (predicted)                                                                                                             | Fbxw4_predicted                                                  | 0.7 | 0.011376393 | 0.050085364 |
| 1370690_at | heat shock 70kDa protein 9A (predicted)                                                                                                                  | Hspa9a_predicted                                                 | 0.4 | 0.01138638  | 0.050115915 |
| 1381125_at | Tetraspanin 8                                                                                                                                            | Tspan8                                                           | 0.7 | 0.011449006 | 0.050364604 |
| 1392505_at | ---                                                                                                                                                      | ---                                                              | 0.8 | 0.011552533 | 0.050792854 |
| 1370300_at | prolactin regulatory element binding                                                                                                                     | Preb                                                             | 0.5 | 0.01156625  | 0.050836735 |
| 1374541_at | similar to glycogen synthase 1, muscle                                                                                                                   | LOC687978 ///<br>LOC690987                                       | 0.3 | 0.011568695 | 0.050836735 |
| 1383771_at | similar to ubiquitin specific protease 46 (predicted)                                                                                                    | RGD1564808_pre<br>dicted                                         | 0.6 | 0.01158297  | 0.050872282 |
| 1368075_at | lysosomal acid lipase 1                                                                                                                                  | Lip1                                                             | 0.7 | 0.011591204 | 0.05087813  |
| 1384041_at | Transcribed locus                                                                                                                                        | ---                                                              | 0.6 | 0.011596586 | 0.05087813  |
| 1388719_at | Ubiquilin 1                                                                                                                                              | Ubqln1                                                           | 0.7 | 0.011602276 | 0.05087813  |
| 1376806_at | Transcribed locus                                                                                                                                        | ---                                                              | 0.7 | 0.011606359 | 0.050879902 |
| 1398112_at | similar to Putative protein C21orf56 homolog                                                                                                             | LOC499418                                                        | 0.7 | 0.011616772 | 0.05089842  |
| 1389635_at | dishevelled 3, dsh homolog (Drosophila) (predicted)                                                                                                      | Dvl3_predicted                                                   | 0.7 | 0.011664461 | 0.051080152 |
| 1385182_at | plakophilin 1 (predicted)                                                                                                                                | Pkp1_predicted                                                   | 0.6 | 0.011676081 | 0.051117427 |
| 1377955_at | CDNA clone IMAGE:7383152                                                                                                                                 | ---                                                              | 0.7 | 0.011682674 | 0.051121115 |

|              |                                                                                             |                         |     |             |             |
|--------------|---------------------------------------------------------------------------------------------|-------------------------|-----|-------------|-------------|
| 1392939_at   | solute carrier family 41, member 3                                                          | Slc41a3                 | 0.7 | 0.011683139 | 0.051121115 |
| 1374312_at   | uridine-cytidine kinase 1 (predicted)                                                       | Uck1_predicted          | 0.6 | 0.011722881 | 0.051254107 |
| 1390785_at   | Transcribed locus                                                                           | ---                     | 0.7 | 0.011727746 | 0.051260464 |
| 1377795_at   | Transcribed locus                                                                           | ---                     | 0.8 | 0.011745369 | 0.051289708 |
| 1370700_at   | phosphate cytidyltransferase 1, choline, beta isoform                                       | Pcyt1b                  | 0.6 | 0.011749734 | 0.051289708 |
| 1398403_at   | ---                                                                                         | ---                     | 0.7 | 0.011753059 | 0.051290609 |
| 1371615_at   | diacylglycerol O-acyltransferase homolog 2 (mouse)                                          | Dgat2                   | 0.7 | 0.011786782 | 0.051410497 |
| 1376494_at   | polymerase (DNA directed), epsilon 3 (p17 subunit)                                          | Pole3                   | 0.6 | 0.011804872 | 0.051443188 |
| 1375934_at   | similar to RIKEN cDNA D330045A20 (predicted)                                                | RGD1566282_predicted    | 0.7 | 0.011825354 | 0.051496802 |
| 1371342_at   | cytochrome c-1 (predicted)                                                                  | Cyc1_predicted          | 0.7 | 0.011830431 | 0.051497253 |
| 1369106_at   | transcription elongation factor A (SII), 2                                                  | Tcea2                   | 0.5 | 0.011853809 | 0.051570777 |
| 1393584_at   | tumor necrosis factor receptor superfamily, member 21 (predicted)                           | Tnfrsf21_predicted      | 0.4 | 0.011854883 | 0.051570777 |
| 1387602_a_at | 5-hydroxytryptamine (serotonin) receptor 3b                                                 | Htr3b                   | 0.2 | 0.011953451 | 0.05190894  |
| 1370545_at   | potassium voltage-gated channel, shaker-related subfamily, member 1                         | Kcna1                   | 0.7 | 0.011996501 | 0.052049181 |
| 1377141_at   | similar to UPF0308 protein C9orf21                                                          | LOC498685               | 0.8 | 0.01205619  | 0.052253019 |
| 1386755_at   | similar to RIKEN cDNA 181006J02                                                             | LOC312863               | 0.4 | 0.012122224 | 0.052486741 |
| 1382344_at   | Transcribed locus                                                                           | ---                     | 0.7 | 0.01212288  | 0.052486741 |
| 1387485_a_at | protein phosphatase 2 (formerly 2A), regulatory subunit B (PR 52), alpha isoform            | Ppp2r2a                 | 0.6 | 0.01214662  | 0.052533607 |
| 1389129_at   | similar to mKIAA0665 protein                                                                | RGD1308952              | 0.7 | 0.012147204 | 0.052533607 |
| 1372248_at   | sestrin 1 (predicted)                                                                       | Sesn1_predicted         | 0.7 | 0.012183247 | 0.052623436 |
| 1394047_at   | ---                                                                                         | ---                     | 0.7 | 0.012200908 | 0.052658235 |
| 1372465_at   | nucleolar protein family 6 (RNA-associated) (predicted)                                     | Nol6_predicted          | 0.8 | 0.012212279 | 0.052693484 |
| 1381883_at   | CDNA clone IMAGE:7315883                                                                    | ---                     | 0.7 | 0.012273543 | 0.052916184 |
| 1376771_at   | Transcribed locus                                                                           | ---                     | 0.7 | 0.012363567 | 0.053233959 |
| 1373269_at   | Transcribed locus                                                                           | ---                     | 0.7 | 0.012372756 | 0.053246231 |
| 1382752_at   | ---                                                                                         | ---                     | 0.8 | 0.012399424 | 0.053319146 |
| 1388819_at   | secretory carrier membrane protein 1                                                        | Scamp1                  | 0.5 | 0.012403938 | 0.053324612 |
| 1390294_at   | Transcribed locus                                                                           | ---                     | 0.5 | 0.012467934 | 0.053523705 |
| 1389509_at   | Sin3A associated protein 130 (predicted)                                                    | Sap130_predicted        | 0.8 | 0.012504227 | 0.05364359  |
| 1372140_at   | similar to chromosome 6 open reading frame 80; chemokine C-C motif receptor-like 1 adjacent | RGD1310326              | 0.6 | 0.012507832 | 0.053645064 |
| 1393181_at   | Transcribed locus                                                                           | ---                     | 0.4 | 0.012518435 | 0.053662553 |
| 1384157_at   | similar to ADP-ribosylation factor-like 10C                                                 | LOC500282               | 0.4 | 0.012560809 | 0.053816147 |
| 1369651_at   | thymus cell antigen 1, theta                                                                | Thy1                    | 0.7 | 0.012564866 | 0.053819511 |
| 1388027_a_at | reticulum 4                                                                                 | Rtn4                    | 0.4 | 0.012642275 | 0.054114399 |
| 1384398_at   | WW domain containing E3 ubiquitin protein ligase 2 (predicted)                              | Wwp2_predicted          | 0.6 | 0.012655704 | 0.05412403  |
| 1386120_at   | hypothetical protein LOC679389 /// hypothetical protein LOC689147                           | LOC679389 /// LOC689147 | 0.6 | 0.012675333 | 0.054189548 |
| 1390456_at   | Transcribed locus                                                                           | ---                     | 0.8 | 0.012677613 | 0.054189548 |
| 1383869_at   | Transcribed locus                                                                           | ---                     | 0.7 | 0.012703259 | 0.054242784 |
| 1372832_at   | Transcribed locus                                                                           | ---                     | 0.6 | 0.012720486 | 0.054302244 |
| 1379519_at   | Transcribed locus                                                                           | ---                     | 0.6 | 0.012763171 | 0.054417051 |
| 1380850_at   | Transcribed locus                                                                           | ---                     | 0.6 | 0.012770336 | 0.054417051 |
| 1388259_at   | small nuclear ribonucleoprotein N                                                           | Snrpn                   | 0.6 | 0.012779334 | 0.054417051 |
| 1372874_at   | Serologically defined colon cancer antigen 8                                                | Sdccag8                 | 0.7 | 0.01278674  | 0.054417051 |
| 1371932_at   | similar to hypothetical protein FLJ38482                                                    | RGD1309341              | 0.7 | 0.012790758 | 0.054417051 |
| 1393847_at   | NFKB inhibitor interacting Ras-like protein 1 (predicted)                                   | Nkiras1_predicted       | 0.6 | 0.012793698 | 0.054417051 |
| 1379073_at   | similar to solute carrier family 25 (mitochondrial carrier; phosphate carrier), member 23   | LOC301113               | 0.6 | 0.012803106 | 0.054442989 |
| 1392477_at   | ets variant gene 1 (predicted)                                                              | Etv1_predicted          | 0.8 | 0.012809646 | 0.054456721 |
| 1387900_at   | CDP-diacylglycerol--inositol 3-phosphatidyltransferase (phosphatidylinositol synthase)      | Cdipt                   | 0.6 | 0.012814798 | 0.054464549 |
| 1376738_at   | tetratricopeptide repeat domain 23                                                          | Ttc23                   | 0.7 | 0.012836792 | 0.054543932 |
| 1388475_at   | similar to prion protein interacting protein 1                                              | LOC313535               | 0.8 | 0.012857838 | 0.054618119 |
| 1368052_at   | tetraspanin 8                                                                               | Tspan8                  | 0.6 | 0.012860893 | 0.054618119 |

|              |                                                                                                                                                     |                      |     |             |             |
|--------------|-----------------------------------------------------------------------------------------------------------------------------------------------------|----------------------|-----|-------------|-------------|
| 1385622_at   | ---                                                                                                                                                 | ---                  | 0.6 | 0.012868618 | 0.054636816 |
| 1389759_at   | cadherin EGF LAG seven-pass G-type receptor 1                                                                                                       | Celsr1               | 0.8 | 0.012882819 | 0.054682994 |
| 1370318_at   | phosphatidylinositol 4-kinase, catalytic, alpha polypeptide                                                                                         | Pik4ca               | 0.8 | 0.012903801 | 0.054743803 |
| 1389552_at   | LIM and senescent cell antigen-like domains 1 (predicted)                                                                                           | Lims1_predicted      | 0.7 | 0.012957911 | 0.054930915 |
| 1384227_at   | Protein tyrosine phosphatase, receptor type, K, extracellular region                                                                                | Ptprk                | 0.6 | 0.012961424 | 0.05493159  |
| 1391305_at   | ---                                                                                                                                                 | ---                  | 0.5 | 0.013043269 | 0.055164743 |
| 1386154_at   | similar to KIAA1411 protein (predicted)                                                                                                             | RGD1304927_predicted | 0.8 | 0.013069192 | 0.0552458   |
| 1372924_at   | Transcribed locus, strongly similar to XP_001077303.1 similar to mediator of RNA polymerase II transcription, subunit 9 homolog [Rattus norvegicus] | ---                  | 0.6 | 0.013069215 | 0.0552458   |
| 1376787_at   | similar to hypothetical protein FLJ31810 (predicted)                                                                                                | RGD1310773_predicted | 0.7 | 0.013072511 | 0.0552458   |
| 1373300_at   | ---                                                                                                                                                 | ---                  | 0.4 | 0.013080906 | 0.055258826 |
| 1395384_at   | ubiquitin specific protease 31 (predicted)                                                                                                          | Usp31_predicted      | 0.7 | 0.013082312 | 0.055258826 |
| 1395540_at   | similar to Solute carrier family 35, member E3 (predicted)                                                                                          | RGD1564876_predicted | 0.6 | 0.013107171 | 0.055349617 |
| 1385254_at   | similar to Serine/threonine-protein kinase ATR (Ataxia telangiectasia and Rad3-related protein)                                                     | LOC685055            | 0.7 | 0.013116895 | 0.055363937 |
| 1392994_at   | similar to Nicotinamide riboside kinase 1                                                                                                           | LOC499330            | 0.7 | 0.013119743 | 0.055363937 |
| 1389155_at   | downstream of Stk11 (predicted)                                                                                                                     | Dos_predicted        | 0.6 | 0.013124027 | 0.055363937 |
| 1382259_a_at | ---                                                                                                                                                 | ---                  | 0.6 | 0.013138205 | 0.055407342 |
| 1393952_at   | similar to CTCL tumor antigen se57-1 (predicted)                                                                                                    | RGD1561424_predicted | 0.6 | 0.013141053 | 0.055407342 |
| 1398425_at   | similar to hypothetical protein MGC39325-like protein                                                                                               | MGC109194            | 0.8 | 0.013175986 | 0.055497725 |
| 1382131_at   | Transcribed locus                                                                                                                                   | ---                  | 0.7 | 0.013204993 | 0.055578936 |
| 1373282_at   | similar to mitochondrial carrier protein MGC4399                                                                                                    | LOC686808            | 0.6 | 0.013205687 | 0.055578936 |
| 1373993_at   | Similar to small nuclear RNA activating complex, polypeptide 5                                                                                      | LOC691501            | 0.3 | 0.013215726 | 0.055589883 |
| 1386685_at   | sacsin (predicted)                                                                                                                                  | Sacs_predicted       | 0.4 | 0.013218144 | 0.055589883 |
| 1367609_at   | macrophage migration inhibitory factor                                                                                                              | Mif                  | 0.6 | 0.013241071 | 0.055643622 |
| 1397815_at   | similar to ADP-ribosylation factor-like 10C                                                                                                         | LOC500282            | 0.4 | 0.013267638 | 0.055712564 |
| 1371113_a_at | transferrin receptor                                                                                                                                | Tfrc                 | 0.4 | 0.013279142 | 0.055742272 |
| 1373635_at   | similar to Myb protein P42POP (predicted)                                                                                                           | RGD1565160_predicted | 0.6 | 0.013281491 | 0.055742272 |
| 1377456_at   | ---                                                                                                                                                 | ---                  | 0.8 | 0.013336468 | 0.055901688 |
| 1382858_at   | intimal thickness-related receptor                                                                                                                  | MGC94555             | 0.7 | 0.013400962 | 0.056043485 |
| 1385285_at   | Transcribed locus                                                                                                                                   | ---                  | 0.6 | 0.013406471 | 0.05605227  |
| 1370527_a_at | casein kinase 1, delta                                                                                                                              | Csnk1d               | 0.4 | 0.013411301 | 0.056058215 |
| 1393707_at   | Bcl2-like 2                                                                                                                                         | Bcl2l2               | 0.6 | 0.013426364 | 0.056102551 |
| 1390253_at   | ankyrin repeat domain 9                                                                                                                             | Ankrd9               | 0.6 | 0.01344794  | 0.05615428  |
| 1385124_at   | similar to Tribbles homolog 2 (predicted)                                                                                                           | RGD1564451_predicted | 0.7 | 0.013461281 | 0.056181462 |
| 1368345_at   | microtubule-associated protein 6                                                                                                                    | Mtap6                | 0.6 | 0.013468826 | 0.056198693 |
| 1395621_at   | similar to Mitochondrial carrier triple repeat 1 (predicted)                                                                                        | RGD1565119_predicted | 0.6 | 0.01350622  | 0.056311866 |
| 1371884_at   | tetratricopeptide repeat domain 3 (predicted)                                                                                                       | Ttc3_predicted       | 0.8 | 0.013545326 | 0.056446294 |
| 1371432_at   | vesicle amine transport protein 1 homolog (T californica)                                                                                           | Vat1                 | 0.4 | 0.013652749 | 0.05678595  |
| 1372332_at   | Transcribed locus                                                                                                                                   | ---                  | 0.8 | 0.013660788 | 0.05678595  |
| 1383801_at   | Transcribed locus                                                                                                                                   | ---                  | 0.5 | 0.013661357 | 0.05678595  |
| 1379443_at   | Hermansky-Pudlak syndrome 3 homolog (human) (predicted)                                                                                             | Hps3_predicted       | 0.7 | 0.013668812 | 0.056802583 |
| 1376179_at   | Inter-alpha trypsin inhibitor, heavy chain 3                                                                                                        | Itih3                | 0.8 | 0.013677385 | 0.056823851 |
| 1367872_at   | adaptor protein complex AP-1, beta 1 subunit                                                                                                        | Ap1b1                | 0.7 | 0.013701026 | 0.056844472 |
| 1377662_at   | pirin                                                                                                                                               | Pir                  | 0.8 | 0.013702615 | 0.056844472 |
| 1379324_at   | Transcribed locus                                                                                                                                   | ---                  | 0.6 | 0.013735378 | 0.056921012 |
| 1387916_at   | cytochrome P450 4F6                                                                                                                                 | Cyp4f6               | 0.7 | 0.013766502 | 0.056980884 |
| 1369390_a_at | dipeptidylpeptidase 6                                                                                                                               | Dpp6                 | 0.3 | 0.013767413 | 0.056980884 |
| 1372731_at   | Ring finger protein 135                                                                                                                             | Rnf135               | 0.7 | 0.013770477 | 0.056980884 |
| 1389845_at   | Transcribed locus                                                                                                                                   | ---                  | 0.7 | 0.013771008 | 0.056980884 |

|              |                                                                                                 |                         |     |             |             |
|--------------|-------------------------------------------------------------------------------------------------|-------------------------|-----|-------------|-------------|
| 1389120_at   | potassium voltage gated channel, Shaw-related subfamily, member 3                               | Kcnc3                   | 0.8 | 0.013829848 | 0.057154104 |
| 1377817_at   | Bwk1 leukemia-related gene                                                                      | Bwk1                    | 0.7 | 0.013852446 | 0.057218045 |
| 1374783_at   | Transcribed locus                                                                               | ---                     | 0.5 | 0.013859342 | 0.057218045 |
| 1373839_at   | Neighbor of Punc E11 (predicted)                                                                | Nope_predicted          | 0.7 | 0.013861851 | 0.057218045 |
| 1392357_at   | Transcribed locus                                                                               | ---                     | 0.7 | 0.013865841 | 0.057218045 |
| 1370325_at   | golgi reassembly stacking protein 2                                                             | Gorasp2                 | 0.6 | 0.01387398  | 0.057235824 |
| 1375897_at   | Transcribed locus                                                                               | ---                     | 0.6 | 0.013899701 | 0.057309671 |
| 1368595_at   | matrix metalloproteinase 24                                                                     | Mmp24                   | 0.7 | 0.013909591 | 0.057321853 |
| 1389726_at   | Transcribed locus                                                                               | ---                     | 0.8 | 0.013912259 | 0.057321853 |
| 1373129_at   | Transcribed locus                                                                               | ---                     | 0.7 | 0.013925629 | 0.05734821  |
| 1370925_at   | similar to Potential phospholipid-transporting ATPase IIB                                       | LOC291411               | 0.4 | 0.013943603 | 0.057385309 |
| 1393405_at   | Transcribed locus                                                                               | ---                     | 0.7 | 0.013954946 | 0.057385309 |
| 1372434_at   | CASK-interacting protein CIP98                                                                  | Cip98                   | 0.8 | 0.013955571 | 0.057385309 |
| 1372728_at   | Sortilin 1                                                                                      | Sort1                   | 0.8 | 0.013997694 | 0.057529752 |
| 1382088_at   | Ryanodine receptor 2, cardiac                                                                   | Ryr2                    | 0.7 | 0.014005015 | 0.057545463 |
| 1379203_at   | transcription factor Dp 2 (predicted)                                                           | Tcfdp2_predicted        | 0.7 | 0.014031273 | 0.057638955 |
| 1375213_at   | phosphoenolpyruvate carboxykinase 2 (mitochondrial) (predicted)                                 | Pck2_predicted          | 0.5 | 0.014037996 | 0.057652175 |
| 1372943_at   | similar to Ubiquitin-associated protein 2-like                                                  | LOC497952               | 0.6 | 0.014070005 | 0.057769205 |
| 1378774_at   | Procollagen, type XXIII, alpha 1                                                                | Col23a1                 | 0.7 | 0.014101005 | 0.057882038 |
| 1388691_at   | ubiquitin 4 (predicted)                                                                         | Ubqln4_predicted        | 0.8 | 0.01410476  | 0.057883009 |
| 1397637_at   | Transcribed locus                                                                               | ---                     | 0.6 | 0.014127369 | 0.057946872 |
| 1370990_at   | similar to cytokine receptor related protein 4                                                  | Cytor4                  | 0.6 | 0.014145151 | 0.058001183 |
| 1389317_at   | similar to hypothetical protein FLJ20507 (predicted)                                            | RGD1309744_predicted    | 0.8 | 0.014196562 | 0.058143689 |
| 1390472_at   | N-acylsphingosine amidohydrolase (acid ceramidase)-like (predicted)                             | Asahl_predicted         | 0.7 | 0.014238542 | 0.058301106 |
| 1373127_at   | Transcribed locus                                                                               | ---                     | 0.7 | 0.014242608 | 0.058303241 |
| 1372071_at   | CD320 antigen                                                                                   | Cd320                   | 0.7 | 0.014259146 | 0.058339791 |
| 1381084_at   | Transcribed locus                                                                               | ---                     | 0.8 | 0.014265683 | 0.058339791 |
| 1367955_at   | RAB4B, member RAS oncogene family                                                               | Rab4b                   | 0.6 | 0.014291103 | 0.058429049 |
| 1380024_at   | Transcribed locus                                                                               | ---                     | 0.5 | 0.014356443 | 0.058637888 |
| 1380308_at   | ---                                                                                             | ---                     | 0.7 | 0.014396501 | 0.058786906 |
| 1398415_at   | Transcribed locus                                                                               | ---                     | 0.4 | 0.014408105 | 0.058805088 |
| 1391639_at   | CDNA clone IMAGE:7313169                                                                        | ---                     | 0.7 | 0.014433646 | 0.058880113 |
| 1369696_at   | Ras-related GTP binding B                                                                       | RragB                   | 0.6 | 0.014439087 | 0.058887703 |
| 1388428_at   | histidyl tRNA synthetase 2 (predicted)                                                          | Hars2_predicted         | 0.7 | 0.014447428 | 0.058907115 |
| 1376678_at   | similar to amyloid beta (A4) precursor protein-binding, family B, member 2 (predicted)          | RGD1562438_predicted    | 0.7 | 0.014463066 | 0.05895626  |
| 1378400_at   | similar to RIKEN cDNA 4632404H22 (predicted)                                                    | RGD1560129_predicted    | 0.6 | 0.01448576  | 0.059003614 |
| 1375855_at   | ependymin related protein 2 (zebrafish)                                                         | Epdr2                   | 0.6 | 0.014489383 | 0.059003614 |
| 1369371_a_at | gamma-aminobutyric acid (GABA) B receptor 1 component of oligomeric golgi complex 8 (predicted) | Gabbr1                  | 0.4 | 0.014495406 | 0.059003614 |
| 1374045_at   | ---                                                                                             | Cog8_predicted          | 0.6 | 0.014538319 | 0.059116505 |
| 1383327_at   | ---                                                                                             | ---                     | 0.6 | 0.014558199 | 0.059182712 |
| 1392663_at   | Transcribed locus, strongly similar to XP_001065986.1 hypothetical protein [Rattus norvegicus]  | ---                     | 0.6 | 0.014599379 | 0.059320797 |
| 1373910_at   | Transcribed locus                                                                               | ---                     | 0.7 | 0.014641868 | 0.059464062 |
| 1381358_at   | similar to AP2 associated kinase 1 (predicted)                                                  | RGD1563580_predicted    | 0.8 | 0.014677419 | 0.059579022 |
| 1370419_a_at | SH3-domain kinase binding protein 1                                                             | Sh3kbp1                 | 0.8 | 0.014705546 | 0.059667889 |
| 1383182_at   | serine/arginine-rich protein specific kinase 1                                                  | Srpk1                   | 0.8 | 0.014713443 | 0.059667889 |
| 1384444_at   | ---                                                                                             | ---                     | 0.6 | 0.014713461 | 0.059667889 |
| 1372920_at   | similar to Proline oxidase, mitochondrial precursor (Proline dehydrogenase)                     | LOC680409 /// LOC682565 | 0.7 | 0.014713823 | 0.059667889 |
| 1389712_at   | early B-cell factor 3 (predicted)                                                               | Ebf3_predicted          | 0.6 | 0.014749737 | 0.059778095 |
| 1389139_at   | similar to Ttc15 protein (predicted)                                                            | RGD1566054_predicted    | 0.7 | 0.014751902 | 0.059778095 |
| 1383864_at   | Transcribed locus                                                                               | ---                     | 0.6 | 0.014785347 | 0.059898864 |
| 1393564_at   | similar to Ubiquitin ligase protein DZIP3 (DAZ-interacting protein 3 homolog) (predicted)       | RGD1563278_predicted    | 0.7 | 0.014801196 | 0.059948306 |
| 1391928_at   | golgi associated PDZ and coiled-coil motif containing (predicted)                               | Gopc_predicted          | 0.7 | 0.014816073 | 0.059979022 |
| 1376141_at   | Transcribed locus                                                                               | ---                     | 0.4 | 0.014820085 | 0.059980501 |



|              |                                                                                                   |                            |     |             |             |
|--------------|---------------------------------------------------------------------------------------------------|----------------------------|-----|-------------|-------------|
| 1383066_at   | ---                                                                                               | ---                        | 0.4 | 0.014842661 | 0.060057093 |
| 1389341_at   | plexin D1 (predicted)                                                                             | Plxd1_predicted            | 0.8 | 0.014922795 | 0.060247945 |
| 1384410_at   | Sorting nexin 12 (predicted)                                                                      | Snx12_predicted            | 0.7 | 0.014935881 | 0.060279935 |
| 1393695_at   | Tudor domain containing 3                                                                         | Tdrd3                      | 0.7 | 0.014997545 | 0.060490344 |
| 1369391_at   | glutamate receptor, metabotropic 8                                                                | Grm8                       | 0.5 | 0.01500323  | 0.060498437 |
| 1374090_at   | similar to DKFZP547E1010 protein                                                                  | LOC361990                  | 0.4 | 0.015022089 | 0.060525868 |
| 1378315_at   | Transcribed locus                                                                                 | ---                        | 0.5 | 0.015032112 | 0.060525868 |
| 1396202_at   | Transcribed locus                                                                                 | ---                        | 0.7 | 0.015072697 | 0.060674431 |
| 1376753_at   | Fucose-1-phosphate guanylyltransferase                                                            | Fpgt                       | 0.6 | 0.015112384 | 0.060804426 |
| 1383262_at   | ---                                                                                               | ---                        | 0.7 | 0.015170734 | 0.06097953  |
| 1396952_at   | Transcribed locus                                                                                 | ---                        | 0.6 | 0.015192862 | 0.061023737 |
| 1398371_at   | similar to RIKEN cDNA 1700034M03 gene                                                             | RGD1304751                 | 0.7 | 0.01520887  | 0.061058212 |
| 1371534_at   | solute carrier family 25 (mitochondrial carrier, glutamate), member 22                            | Slc25a22                   | 0.8 | 0.015258775 | 0.061228673 |
| 1389794_at   | Transcribed locus                                                                                 | ---                        | 0.7 | 0.01530769  | 0.061394998 |
| 1373215_at   | active BCR-related gene (predicted)                                                               | Abr_predicted              | 0.6 | 0.015334892 | 0.061474116 |
| 1370834_at   | heparan sulfate (glucosamine) 3-O-sulfotransferase 1                                              | Hs3st1                     | 0.7 | 0.015342779 | 0.061490748 |
| 1396330_at   | Transcribed locus                                                                                 | ---                        | 0.8 | 0.01536024  | 0.061541845 |
| 1390794_at   | similar to peptide deformylase-like protein                                                       | LOC686957 ///<br>LOC690214 | 0.7 | 0.015369729 | 0.061553761 |
| 1368619_at   | DEAD (Asp-Glu-Ala-Asp) box polypeptide 25                                                         | Ddx25                      | 0.6 | 0.015410343 | 0.061641742 |
| 1368539_at   | sodium channel, voltage-gated, type IX, alpha                                                     | Scn9a                      | 0.8 | 0.015444354 | 0.061762395 |
| 1379031_at   | Transcribed locus                                                                                 | ---                        | 0.4 | 0.01546672  | 0.061836802 |
| 1376630_at   | ---                                                                                               | ---                        | 0.6 | 0.015517293 | 0.06202392  |
| 1371625_at   | brain glycogen phosphorylase                                                                      | Pygb                       | 0.5 | 0.015568057 | 0.062181496 |
| 1392835_at   | ---                                                                                               | ---                        | 0.8 | 0.015583812 | 0.062229312 |
| 1381807_at   | Transcribed locus                                                                                 | ---                        | 0.6 | 0.015632847 | 0.062374082 |
| 1387904_at   | inositol hexaphosphate kinase 1                                                                   | Ihpk1                      | 0.6 | 0.015637721 | 0.062374082 |
| 1383124_at   | ---                                                                                               | ---                        | 0.7 | 0.015678943 | 0.06251812  |
| 1377751_at   | Transcribed locus                                                                                 | ---                        | 0.8 | 0.015694004 | 0.062539676 |
| 1374577_at   | transforming growth factor beta regulated gene 4                                                  | Tbrg4                      | 0.7 | 0.015695755 | 0.062539676 |
| 1389452_at   | zinc finger, DHHC domain containing 8                                                             | Zdhhc8                     | 0.7 | 0.015714325 | 0.062598503 |
| 1377707_at   | solute carrier family 35, member B4 (predicted)                                                   | Slc35b4_predicted          | 0.4 | 0.01573377  | 0.062620792 |
| 1395703_at   | Transcribed locus                                                                                 | ---                        | 0.3 | 0.015744526 | 0.062627801 |
| 1390876_at   | similar to KIAA0377-like protein (predicted)                                                      | RGD1311552_pre<br>dicted   | 0.8 | 0.01577761  | 0.062744229 |
| 1389044_at   | similar to golgi-specific brefeldin A-resistance guanine nucleotide exchange factor 1 (predicted) | RGD1307160_pre<br>dicted   | 0.5 | 0.015931103 | 0.06323233  |
| 1372489_at   | sarcolemma associated protein (predicted)                                                         | Simap_predicted            | 0.8 | 0.015936328 | 0.063237809 |
| 1375448_at   | Transcribed locus                                                                                 | ---                        | 0.7 | 0.015946404 | 0.063262529 |
| 1368902_at   | p21 (CDKN1A)-activated kinase 3                                                                   | Pak3                       | 0.7 | 0.016024013 | 0.063460875 |
| 1370129_at   | meningioma expressed antigen 5 (hyaluronidase)                                                    | Mgea5                      | 0.7 | 0.016043455 | 0.063509686 |
| 1371886_at   | carnitine acetyltransferase                                                                       | Crat                       | 0.8 | 0.016047986 | 0.063512337 |
| 1371563_at   | regulator of chromosome condensation 2 (predicted)                                                | Rcc2_predicted             | 0.7 | 0.016116897 | 0.063723731 |
| 1389591_at   | similar to HS1 binding protein 3 (predicted)                                                      | RGD1311331_pre<br>dicted   | 0.7 | 0.016124659 | 0.063723786 |
| 1390871_at   | transcription elongation regulator 1 (CA150) (predicted)                                          | Tcerg1_predicted           | 0.6 | 0.016160603 | 0.063789202 |
| 1377789_at   | Transcribed locus                                                                                 | ---                        | 0.5 | 0.016175783 | 0.063833799 |
| 1372104_at   | ---                                                                                               | ---                        | 0.7 | 0.016184653 | 0.063853483 |
| 1386983_at   | hydroxymethylbilane synthase                                                                      | Hmbs                       | 0.6 | 0.01619636  | 0.063854403 |
| 1397262_at   | Transcribed locus                                                                                 | ---                        | 0.7 | 0.016244584 | 0.063997823 |
| 1370831_at   | monoglyceride lipase                                                                              | Mgll                       | 0.7 | 0.016272471 | 0.064053944 |
| 1371593_at   | Proliferating cell nuclear antigen                                                                | Pcna                       | 0.4 | 0.016274406 | 0.064053944 |
| 1390179_at   | ankyrin repeat domain 52 (predicted)                                                              | Ankrd52_predicte<br>d      | 0.7 | 0.016300388 | 0.064140858 |
| 1373976_at   | similar to 8430411H09Rik protein (predicted)                                                      | RGD1563990_pre<br>dicted   | 0.7 | 0.016334066 | 0.064242637 |
| 1392295_a_at | ---                                                                                               | ---                        | 0.7 | 0.016341173 | 0.064255229 |
| 1388603_a_at | HESB like domain containing 2                                                                     | Hblid2                     | 0.5 | 0.016362276 | 0.064284549 |
| 1367866_at   | fibulin 5                                                                                         | Fbln5                      | 0.4 | 0.016374344 | 0.064284549 |
| 1388623_at   | EH-domain containing 1                                                                            | Ehd1                       | 0.7 | 0.016378443 | 0.064284549 |
| 1395665_at   | Transcribed locus                                                                                 | ---                        | 0.7 | 0.01638543  | 0.064284549 |

|              |                                                                                                                                                                                                                                                                                                                                                                                                                                 |                                                                                                                                                                        |     |             |             |
|--------------|---------------------------------------------------------------------------------------------------------------------------------------------------------------------------------------------------------------------------------------------------------------------------------------------------------------------------------------------------------------------------------------------------------------------------------|------------------------------------------------------------------------------------------------------------------------------------------------------------------------|-----|-------------|-------------|
| 1382219_at   | similar to RIKEN cDNA 1700108L22                                                                                                                                                                                                                                                                                                                                                                                                | RGD1307509                                                                                                                                                             | 0.7 | 0.016393179 | 0.064284549 |
| 1381627_at   | syntaphilin (predicted)                                                                                                                                                                                                                                                                                                                                                                                                         | Snph_predicted                                                                                                                                                         | 0.7 | 0.016402657 | 0.064284549 |
| 1388165_at   | similar to Protein KIAA1688                                                                                                                                                                                                                                                                                                                                                                                                     | LOC500901                                                                                                                                                              | 0.7 | 0.016407962 | 0.064287319 |
| 1374217_at   | similar to chromosome 16 open reading frame 5                                                                                                                                                                                                                                                                                                                                                                                   | RGD1310686                                                                                                                                                             | 0.5 | 0.016417945 | 0.064311111 |
| 1368772_at   | solute carrier family 4, member 3                                                                                                                                                                                                                                                                                                                                                                                               | Slc4a3                                                                                                                                                                 | 0.8 | 0.016485889 | 0.064546512 |
| 1371334_at   | integral membrane protein 2C                                                                                                                                                                                                                                                                                                                                                                                                    | Itm2c                                                                                                                                                                  | 0.7 | 0.016523953 | 0.064656133 |
| 1385819_at   | misato homolog 1 (Drosophila) (predicted)                                                                                                                                                                                                                                                                                                                                                                                       | Msto1_predicted                                                                                                                                                        | 0.6 | 0.016551305 | 0.064710212 |
| 1399146_at   | transmembrane protein 15 (predicted)                                                                                                                                                                                                                                                                                                                                                                                            | Tmem15_predicted                                                                                                                                                       | 0.7 | 0.016621022 | 0.064936477 |
| 1390912_at   | hypothetical protein LOC678810 /// hypothetical protein LOC685448                                                                                                                                                                                                                                                                                                                                                               | LOC678810 /// LOC685448                                                                                                                                                | 0.5 | 0.016674272 | 0.065112926 |
| 1398658_at   | Similar to RUN and FYVE domain-containing 2                                                                                                                                                                                                                                                                                                                                                                                     | LOC690777                                                                                                                                                              | 0.8 | 0.016678062 | 0.065112926 |
| 1383694_at   | similar to RIKEN cDNA 1110061N23 (predicted)                                                                                                                                                                                                                                                                                                                                                                                    | RGD1565957_predicted                                                                                                                                                   | 0.6 | 0.016684886 | 0.065119714 |
| 1374814_at   | ---                                                                                                                                                                                                                                                                                                                                                                                                                             | ---                                                                                                                                                                    | 0.5 | 0.016723274 | 0.065222424 |
| 1398368_at   | Transcribed locus                                                                                                                                                                                                                                                                                                                                                                                                               | ---                                                                                                                                                                    | 0.6 | 0.016723965 | 0.065222424 |
| 1385577_at   | ---                                                                                                                                                                                                                                                                                                                                                                                                                             | ---                                                                                                                                                                    | 0.7 | 0.016728998 | 0.065222424 |
| 1395265_at   | ---                                                                                                                                                                                                                                                                                                                                                                                                                             | ---                                                                                                                                                                    | 0.5 | 0.016731512 | 0.065222424 |
| 1372118_at   | HMP19 protein                                                                                                                                                                                                                                                                                                                                                                                                                   | MGC125201                                                                                                                                                              | 0.5 | 0.016749529 | 0.065252546 |
| 1370029_at   | C-terminal binding protein 1                                                                                                                                                                                                                                                                                                                                                                                                    | Ctbp1                                                                                                                                                                  | 0.7 | 0.016772478 | 0.065287709 |
| 1387073_at   | synaptosomal-associated protein 25                                                                                                                                                                                                                                                                                                                                                                                              | Snap25                                                                                                                                                                 | 0.7 | 0.016836395 | 0.065451434 |
| 1392711_at   | Transcribed locus                                                                                                                                                                                                                                                                                                                                                                                                               | ---                                                                                                                                                                    | 0.7 | 0.016855151 | 0.065508869 |
| 1380712_at   | Transcribed locus                                                                                                                                                                                                                                                                                                                                                                                                               | ---                                                                                                                                                                    | 0.7 | 0.016863931 | 0.06551203  |
| 1377812_a_at | transmembrane protein 24                                                                                                                                                                                                                                                                                                                                                                                                        | Tmem24                                                                                                                                                                 | 0.7 | 0.016916902 | 0.065655781 |
| 1372537_at   | ---                                                                                                                                                                                                                                                                                                                                                                                                                             | ---                                                                                                                                                                    | 0.7 | 0.016943685 | 0.065713213 |
| 1395808_at   | ---                                                                                                                                                                                                                                                                                                                                                                                                                             | ---                                                                                                                                                                    | 0.7 | 0.016954099 | 0.065738101 |
| 1373198_at   | similar to RIKEN cDNA 2810451A06                                                                                                                                                                                                                                                                                                                                                                                                | RGD1311098                                                                                                                                                             | 0.6 | 0.016964843 | 0.065764258 |
| 1388536_at   | HLA-B associated transcript 2                                                                                                                                                                                                                                                                                                                                                                                                   | Bat2                                                                                                                                                                   | 0.6 | 0.016979845 | 0.065806902 |
| 1385340_at   | Exostoses (multiple)-like 2                                                                                                                                                                                                                                                                                                                                                                                                     | Extl2                                                                                                                                                                  | 0.7 | 0.01698447  | 0.065809319 |
| 1393429_at   | Transcribed locus                                                                                                                                                                                                                                                                                                                                                                                                               | ---                                                                                                                                                                    | 0.8 | 0.017000022 | 0.065854065 |
| 1373541_at   | Rho guanine nucleotide exchange factor (GEF) 17 (predicted)                                                                                                                                                                                                                                                                                                                                                                     | Arhgef17_predicted                                                                                                                                                     | 0.8 | 0.01702785  | 0.065946333 |
| 1377145_at   | similar to monogenic, audiogenic seizure susceptibility 1                                                                                                                                                                                                                                                                                                                                                                       | LOC362068                                                                                                                                                              | 0.7 | 0.017040475 | 0.065964165 |
| 1370994_at   | huntingtin interacting protein 1 related                                                                                                                                                                                                                                                                                                                                                                                        | Hip1r                                                                                                                                                                  | 0.8 | 0.017101394 | 0.066184407 |
| 1367746_a_at | flotillin 2                                                                                                                                                                                                                                                                                                                                                                                                                     | Flot2                                                                                                                                                                  | 0.4 | 0.017108292 | 0.066195528 |
| 1368417_at   | synaptotagmin V                                                                                                                                                                                                                                                                                                                                                                                                                 | Syt5                                                                                                                                                                   | 0.7 | 0.017131526 | 0.066269833 |
| 1369627_at   | synaptic vesicle glycoprotein 2b                                                                                                                                                                                                                                                                                                                                                                                                | Sv2b                                                                                                                                                                   | 0.6 | 0.017150161 | 0.066279578 |
| 1379333_at   | armadillo repeat containing, X-linked 6                                                                                                                                                                                                                                                                                                                                                                                         | Armxc6                                                                                                                                                                 | 0.8 | 0.017150163 | 0.066279578 |
| 1375049_at   | ---                                                                                                                                                                                                                                                                                                                                                                                                                             | ---                                                                                                                                                                    | 0.6 | 0.017177201 | 0.066352891 |
| 1367907_a_at | clathrin, light polypeptide (Lcb)                                                                                                                                                                                                                                                                                                                                                                                               | Cltb                                                                                                                                                                   | 0.4 | 0.017201525 | 0.066415653 |
| 1382174_at   | Coxsackie virus and adenovirus receptor-like 1                                                                                                                                                                                                                                                                                                                                                                                  | Cxadrl1                                                                                                                                                                | 0.7 | 0.017217368 | 0.066461221 |
| 1393149_at   | protocadherin alpha 4 /// protocadherin alpha 13 /// protocadherin alpha 10 /// protocadherin alpha 12 /// protocadherin alpha 3 /// protocadherin alpha 8 /// protocadherin alpha 1 /// protocadherin alpha 2 /// protocadherin alpha 5 /// protocadherin alpha 6 /// protocadherin alpha 7 /// protocadherin alpha 9 /// protocadherin alpha subfamily C, 1 /// protocadherin alpha subfamily C, 2 /// protocadherin alpha 11 | Pcdha1 /// Pcdha10 /// Pcdha11 /// Pcdha12 /// Pcdha13 /// Pcdha2 /// Pcdha3 /// Pcdha4 /// Pcdha5 /// Pcdha6 /// Pcdha7 /// Pcdha8 /// Pcdha9 /// Pcdhac1 /// Pcdhac2 | 0.8 | 0.017232573 | 0.066488708 |
| 1383972_at   | ---                                                                                                                                                                                                                                                                                                                                                                                                                             | ---                                                                                                                                                                    | 0.7 | 0.01724749  | 0.066513152 |
| 1394450_at   | Transcribed locus                                                                                                                                                                                                                                                                                                                                                                                                               | ---                                                                                                                                                                    | 0.8 | 0.01725104  | 0.066513152 |
| 1373603_at   | similar to RIKEN cDNA 0610007P22 (predicted)                                                                                                                                                                                                                                                                                                                                                                                    | RGD1565744_predicted                                                                                                                                                   | 0.5 | 0.017307434 | 0.066714947 |
| 1383646_at   | Transcribed locus                                                                                                                                                                                                                                                                                                                                                                                                               | ---                                                                                                                                                                    | 0.8 | 0.017351936 | 0.066870816 |
| 1374602_at   | testis-specific protein, Y-encoded-like                                                                                                                                                                                                                                                                                                                                                                                         | Tspyl                                                                                                                                                                  | 0.6 | 0.01741274  | 0.06704231  |
| 1389910_at   | similar to chromosome 20 open reading frame 30; HSPC274 protein                                                                                                                                                                                                                                                                                                                                                                 | RGD1307399                                                                                                                                                             | 0.7 | 0.017488557 | 0.067271232 |
| 1383515_at   | Transcribed locus                                                                                                                                                                                                                                                                                                                                                                                                               | ---                                                                                                                                                                    | 0.7 | 0.017601535 | 0.067610939 |
| 1384927_at   | tubulin, beta 4                                                                                                                                                                                                                                                                                                                                                                                                                 | Tubb4                                                                                                                                                                  | 0.7 | 0.017617024 | 0.067654639 |

|              |                                                                                                                                         |                                    |     |             |             |
|--------------|-----------------------------------------------------------------------------------------------------------------------------------------|------------------------------------|-----|-------------|-------------|
| 1389437_at   | sal-like 2 (Drosophila) (predicted)                                                                                                     | Sall2_predicted                    | 0.6 | 0.017663881 | 0.067787102 |
| 1378046_at   | fucokinase (predicted)                                                                                                                  | Fuk_predicted                      | 0.8 | 0.017676929 | 0.067805532 |
| 1367519_at   | oxysterol binding protein-like 2                                                                                                        | Osbp12                             | 0.8 | 0.017705433 | 0.067883207 |
| 1375692_at   | Transcribed locus                                                                                                                       | ---                                | 0.8 | 0.017731278 | 0.067966457 |
| 1379491_at   | melanocortin 2 receptor accessory protein (predicted)                                                                                   | Mrap_predicted                     | 0.6 | 0.017746116 | 0.068007481 |
| 1387910_at   | erythrocyte protein band 4.1-like 1                                                                                                     | Epb4.111                           | 0.6 | 0.017841492 | 0.068341141 |
| 1369042_at   | phosphatidylinositol glycan, class M                                                                                                    | Pigm                               | 0.5 | 0.017876108 | 0.068408718 |
| 1391144_at   | Transcribed locus                                                                                                                       | ---                                | 0.7 | 0.017882313 | 0.068408718 |
| 1377917_at   | Transcribed locus, weakly similar to XP_001074405.1 similar to zinc finger protein 709 [Rattus norvegicus]                              | ---                                | 0.6 | 0.017883359 | 0.068408718 |
| 1372712_at   | tetratricopeptide repeat domain 1                                                                                                       | Ttc1                               | 0.8 | 0.017884089 | 0.068408718 |
| 1372292_at   | similar to Serine/threonine protein kinase 24 (predicted)                                                                               | RGD1561742_predicted               | 0.6 | 0.017901913 | 0.068420423 |
| 1395914_at   | ---                                                                                                                                     | ---                                | 0.3 | 0.017907947 | 0.068420423 |
| 1377633_a_at | Transcribed locus                                                                                                                       | ---                                | 0.5 | 0.017922395 | 0.068443823 |
| 1390986_at   | Transcribed locus                                                                                                                       | ---                                | 0.7 | 0.017930473 | 0.06845878  |
| 1384941_at   | similar to Shb-like adapter protein, Shf - human (predicted)                                                                            | RGD1562705_predicted               | 0.7 | 0.017941584 | 0.068485304 |
| 1387757_at   | LMBR1 domain containing 1                                                                                                               | Lmbrd1                             | 0.5 | 0.017951701 | 0.068508022 |
| 1378021_at   | Transcribed locus                                                                                                                       | ---                                | 0.8 | 0.017984739 | 0.068602268 |
| 1384471_at   | AP1 gamma subunit binding protein 1                                                                                                     | Ap1gpb1                            | 0.8 | 0.018008775 | 0.068659229 |
| 1370819_at   | casein kinase 1, delta                                                                                                                  | Csnk1d                             | 0.7 | 0.018061128 | 0.068773766 |
| 1367611_at   | transketolase                                                                                                                           | Tkt                                | 0.6 | 0.018100641 | 0.068900564 |
| 1368858_at   | UDP galactosyltransferase 8                                                                                                             | Ugt8                               | 0.4 | 0.018134315 | 0.068996811 |
| 1368322_at   | superoxide dismutase 3, extracellular                                                                                                   | Sod3                               | 0.6 | 0.018169729 | 0.069106659 |
| 1391702_at   | zinc finger protein 446 (predicted)                                                                                                     | Zfp446_predicted                   | 0.7 | 0.018171589 | 0.069106659 |
| 1388322_at   | eukaryotic translation initiation factor 4 gamma, 1                                                                                     | Eif4g1                             | 0.5 | 0.01824561  | 0.069356089 |
| 1376459_at   | similar to AP2 associated kinase 1 (predicted)                                                                                          | RGD1563580_predicted               | 0.8 | 0.018272712 | 0.06942957  |
| 1388938_at   | ubiquitin specific protease 5 (isopeptidase T) (predicted)                                                                              | Usp5_predicted                     | 0.7 | 0.018354523 | 0.069620156 |
| 1399103_at   | hypothetical protein LOC681972 /// hypothetical protein LOC685634                                                                       | LOC681972 /// LOC685634            | 0.7 | 0.018360652 | 0.069620156 |
| 1372426_at   | ADAMTS-like 4                                                                                                                           | Adamtsl4                           | 0.7 | 0.018400963 | 0.069733534 |
| 1384915_at   | intraflagellar transport 88 homolog (Chlamydomonas) (predicted)                                                                         | Ift88_predicted                    | 0.7 | 0.01840426  | 0.069733534 |
| 1369176_at   | solute carrier family 36 (proton/amino acid symporter), member 1                                                                        | Slc36a1                            | 0.7 | 0.018439326 | 0.069850309 |
| 1370906_at   | branched chain keto acid dehydrogenase E1, beta polypeptide                                                                             | Bckdhb                             | 0.6 | 0.018468562 | 0.069914922 |
| 1368272_at   | glutamate oxaloacetate transaminase 1                                                                                                   | Got1                               | 0.4 | 0.018469135 | 0.069914922 |
| 1384002_at   | similar to Potential phospholipid-transporting ATPase IF (ATPase class I type 11B) (ATPase IR)                                          | LOC361929                          | 0.5 | 0.018514629 | 0.070033329 |
| 1389463_at   | protein kinase, cAMP dependent regulatory, type I, beta                                                                                 | Prkar1b                            | 0.7 | 0.018526268 | 0.070033329 |
| 1399136_at   | LEM domain containing 2                                                                                                                 | Lemd2                              | 0.7 | 0.018600397 | 0.070259926 |
| 1377852_at   | Transcribed locus                                                                                                                       | ---                                | 0.5 | 0.01860299  | 0.070259926 |
| 1367517_at   | Transcribed locus                                                                                                                       | ---                                | 0.6 | 0.018623128 | 0.070319838 |
| 1393152_at   | similar to Mut protein (predicted) /// similar to Methylmalonyl-CoA mutase, mitochondrial precursor (MCM) (Methylmalonyl-CoA isomerase) | LOC688517 /// RGD1564912_predicted | 0.6 | 0.018628243 | 0.070323006 |
| 1388039_a_at | gamma-aminobutyric acid (GABA) B receptor 1                                                                                             | Gabbr1                             | 0.4 | 0.018634141 | 0.07032913  |
| 1368225_at   | exocyst complex component 2                                                                                                             | Exoc2                              | 0.8 | 0.01864101  | 0.070338917 |
| 1372540_at   | ubiquitin-like domain containing CTD phosphatase 1                                                                                      | Ublcp1                             | 0.8 | 0.018649    | 0.070352923 |
| 1380086_at   | Transcribed locus                                                                                                                       | ---                                | 0.7 | 0.018719243 | 0.070507459 |
| 1383162_at   | ---                                                                                                                                     | ---                                | 0.8 | 0.01871997  | 0.070507459 |
| 1388815_at   | SAPS domain family, member 1 (predicted)                                                                                                | Saps1_predicted                    | 0.7 | 0.018787484 | 0.070745543 |
| 1369163_at   | glutamate receptor, ionotropic, kainate 4                                                                                               | Grik4                              | 0.6 | 0.018808191 | 0.070789459 |
| 1395167_at   | Transcribed locus                                                                                                                       | ---                                | 0.7 | 0.018824773 | 0.070821105 |
| 1371840_at   | endothelial differentiation sphingolipid G-protein-coupled receptor 1                                                                   | Edg1                               | 0.7 | 0.018851585 | 0.070857147 |
| 1373469_at   | Transcribed locus                                                                                                                       | ---                                | 0.7 | 0.0188839   | 0.070925044 |

|              |                                                                                                                                                                       |                      |     |             |             |
|--------------|-----------------------------------------------------------------------------------------------------------------------------------------------------------------------|----------------------|-----|-------------|-------------|
| 1371008_at   | peptidase (mitochondrial processing) alpha                                                                                                                            | Pmpca                | 0.6 | 0.018900684 | 0.070925044 |
| 1383025_at   | ---                                                                                                                                                                   | ---                  | 0.7 | 0.018911032 | 0.070925044 |
| 1387020_at   | cytochrome P450, subfamily 51                                                                                                                                         | Cyp51                | 0.7 | 0.018912677 | 0.070925044 |
| 1387599_a_at | NAD(P)H dehydrogenase, quinone 1                                                                                                                                      | Nqo1                 | 0.6 | 0.01891277  | 0.070925044 |
| 1393407_at   | F-box and WD-40 domain protein 2 (predicted)                                                                                                                          | Fbxw2_predicted      | 0.5 | 0.019002248 | 0.071195666 |
| 1386012_at   | Transcribed locus                                                                                                                                                     | ---                  | 0.3 | 0.019006649 | 0.071195936 |
| 1387836_at   | prenylated SNARE protein                                                                                                                                              | Ykt6                 | 0.6 | 0.019013089 | 0.071203846 |
| 1391269_at   | ---                                                                                                                                                                   | ---                  | 0.6 | 0.019025501 | 0.071218949 |
| 1381792_at   | mitochondrial ribosomal protein S15                                                                                                                                   | Mrps15               | 0.8 | 0.019029549 | 0.071218949 |
| 1383353_at   | Transcribed locus                                                                                                                                                     | ---                  | 0.7 | 0.019066675 | 0.071323327 |
| 1397190_at   | Transcribed locus                                                                                                                                                     | ---                  | 0.8 | 0.019072378 | 0.071328437 |
| 1390977_at   | suppression of tumorigenicity 7-like                                                                                                                                  | St7l                 | 0.6 | 0.019120222 | 0.071458627 |
| 1382150_at   | similar to RIKEN cDNA 120007B05 gene                                                                                                                                  | RGD1305072           | 0.7 | 0.019129822 | 0.071478261 |
| 1389154_at   | lipoic acid synthetase                                                                                                                                                | Lias                 | 0.8 | 0.019186644 | 0.071674295 |
| 1373903_at   | RCS domain containing 1 (predicted)                                                                                                                                   | Rcsd1_predicted      | 0.7 | 0.019195899 | 0.071692586 |
| 1377195_at   | ATPase, Na+/K+ transporting, beta 3 polypeptide                                                                                                                       | Atp1b3               | 0.7 | 0.019239857 | 0.0718139   |
| 1372089_at   | Transcribed locus, strongly similar to XP_001061027.1 similar to Heat shock factor protein 1 (HSF 1) (Heat shock transcription factor 1) (HSTF 1) [Rattus norvegicus] | ---                  | 0.7 | 0.019296594 | 0.071970606 |
| 1378976_x_at | Exosome component 4 (predicted)                                                                                                                                       | Exosc4_predicted     | 0.8 | 0.019309769 | 0.07198342  |
| 1374475_at   | abhydrolase domain containing 1                                                                                                                                       | Abhd1                | 0.6 | 0.01935308  | 0.072099538 |
| 1374022_at   | Transcribed locus                                                                                                                                                     | ---                  | 0.6 | 0.019374692 | 0.072163707 |
| 1372804_at   | MMR_HSR1 domain containing protein RGD1359460                                                                                                                         | RGD1359460           | 0.6 | 0.0193915   | 0.072193421 |
| 1389493_at   | ankyrin repeat and BTB (POZ) domain containing 1                                                                                                                      | Abtb1                | 0.6 | 0.01942641  | 0.07227726  |
| 1381019_x_at | development and differentiation enhancing (predicted)                                                                                                                 | Ddef1_predicted      | 0.8 | 0.019445379 | 0.072284537 |
| 1398950_at   | ---                                                                                                                                                                   | ---                  | 0.7 | 0.019446685 | 0.072284537 |
| 1372487_at   | hypothetical protein LOC619573                                                                                                                                        | LOC619573            | 0.7 | 0.019469625 | 0.072320773 |
| 1370278_at   | ATP synthase, H+ transporting, mitochondrial F1 complex, delta subunit                                                                                                | Atp5d                | 0.5 | 0.019483117 | 0.072338219 |
| 1375533_at   | vestigial like 4 (Drosophila)                                                                                                                                         | Vgll4                | 0.8 | 0.019507629 | 0.072380212 |
| 1391684_at   | transmembrane protein 14A (predicted)                                                                                                                                 | Tmem14a_predicted    | 0.7 | 0.019516622 | 0.072380924 |
| 1391425_at   | NCK interacting protein with SH3 domain (predicted)                                                                                                                   | Nckipsd_predicted    | 0.7 | 0.019535399 | 0.07243423  |
| 1373618_at   | cAMP responsive element binding protein-like 2                                                                                                                        | Creb2                | 0.5 | 0.01953992  | 0.072434663 |
| 1370691_a_at | thyroid hormone receptor alpha                                                                                                                                        | Thra                 | 0.7 | 0.01956873  | 0.072501148 |
| 1383622_at   | O-acyltransferase (membrane bound) domain containing 5                                                                                                                | Oact5                | 0.8 | 0.019572587 | 0.072501148 |
| 1392984_at   | copine III (predicted)                                                                                                                                                | Cpne3_predicted      | 0.8 | 0.019579727 | 0.072501148 |
| 1367548_at   | similar to FLJ00052 protein (predicted)                                                                                                                               | RGD1305986_predicted | 0.7 | 0.019579894 | 0.072501148 |
| 1384491_at   | similar to aldehyde oxidase structural homolog 2                                                                                                                      | RGD1311975           | 0.7 | 0.019605275 | 0.072578788 |
| 1383700_at   | similar to D15Wsu75e protein                                                                                                                                          | RGD1305776           | 0.8 | 0.019631728 | 0.072644017 |
| 1378292_at   | Transcribed locus                                                                                                                                                     | ---                  | 0.8 | 0.019654593 | 0.072679573 |
| 1388750_at   | transferrin receptor                                                                                                                                                  | Tfrc                 | 0.6 | 0.019699717 | 0.072764642 |
| 1380170_at   | GABA(A) receptor-associated protein like 2                                                                                                                            | Gabarapl2            | 0.6 | 0.019719178 | 0.072803649 |
| 1373018_at   | similar to hypothetical protein FLJ14800 (predicted)                                                                                                                  | RGD1561500_predicted | 0.5 | 0.019719404 | 0.072803649 |
| 1373525_at   | Transcribed locus                                                                                                                                                     | ---                  | 0.5 | 0.019727983 | 0.072803649 |
| 1384413_at   | similar to solute carrier family 35, member A5 (predicted)                                                                                                            | RGD1564361_predicted | 0.7 | 0.019733661 | 0.072808267 |
| 1381063_at   | adenylate cyclase 9 (predicted)                                                                                                                                       | Adcy9_predicted      | 0.8 | 0.019746505 | 0.072818822 |
| 1374736_at   | Transcribed locus                                                                                                                                                     | ---                  | 0.7 | 0.019747348 | 0.072818822 |
| 1377431_at   | similar to CG13901-PA                                                                                                                                                 | RGD1307648           | 0.6 | 0.019777905 | 0.072899074 |
| 1385049_at   | Transcribed locus                                                                                                                                                     | ---                  | 0.6 | 0.019781287 | 0.072899074 |
| 1388487_at   | adducin 1 (alpha)                                                                                                                                                     | Add1                 | 0.8 | 0.019806134 | 0.072961095 |
| 1380120_at   | Microtubule-associated protein 7 (predicted)                                                                                                                          | Mtap7_predicted      | 0.7 | 0.019824187 | 0.072994902 |
| 1393719_at   | Transcribed locus                                                                                                                                                     | ---                  | 0.5 | 0.019841301 | 0.073041566 |
| 1389297_at   | ERO1-like (S. cerevisiae)                                                                                                                                             | Ero1l                | 0.7 | 0.019864061 | 0.073108991 |
| 1384284_at   | Transcribed locus                                                                                                                                                     | ---                  | 0.8 | 0.019885628 | 0.073155626 |
| 1371728_at   | similar to ubiquitin protein ligase E3B                                                                                                                               | LOC687633            | 0.6 | 0.019921971 | 0.073256557 |

|              |                                                                                                                  |                      |     |             |             |
|--------------|------------------------------------------------------------------------------------------------------------------|----------------------|-----|-------------|-------------|
| 1370085_at   | RAS p21 protein activator 1                                                                                      | Rasa1                | 0.8 | 0.019959944 | 0.07329856  |
| 1391308_at   | Similar to vacuolar protein sorting 13C protein (predicted)                                                      | RGD1560364_predicted | 0.8 | 0.019960132 | 0.07329856  |
| 1372982_at   | protein phosphatase 3, regulatory subunit B, alpha isoform (calcineurin B, type I)                               | Ppp3r1               | 0.6 | 0.02002205  | 0.073493122 |
| 1386551_at   | Wolf-Hirschhorn syndrome candidate 1 (predicted)                                                                 | Whsc1_predicted      | 0.6 | 0.020039071 | 0.073518654 |
| 1389656_at   | similar to Tetraspanin-15 (Tspan-15) (Transmembrane 4 superfamily member 15) (Tetraspan NET-7)                   | LOC679462            | 0.4 | 0.020050379 | 0.073523058 |
| 1387046_at   | selective LIM binding factor, rat homolog                                                                        | Slb                  | 0.5 | 0.020058023 | 0.073523058 |
| 1370181_at   | RAB4A, member RAS oncogene family                                                                                | Rab4a                | 0.5 | 0.020063876 | 0.073523058 |
| 1384379_at   | Syntaxin 12                                                                                                      | Stx12                | 0.7 | 0.020070436 | 0.073523058 |
| 1395081_at   | similar to nuclear receptor coactivator 7 (predicted)                                                            | RGD1566426_predicted | 0.6 | 0.020147607 | 0.073730203 |
| 1391158_a_at | ataxin 2 (predicted)                                                                                             | Atxn2_predicted      | 0.8 | 0.020147908 | 0.073730203 |
| 1381220_at   | activin receptor IIA                                                                                             | Acvr2a               | 0.8 | 0.020149396 | 0.073730203 |
| 1374678_at   | sema domain, immunoglobulin domain (Ig), transmembrane domain (TM) and short cytoplasmic domain, (semaphorin) 4B | Sema4b               | 0.8 | 0.020167641 | 0.073780551 |
| 1392525_at   | Prostaglandin F receptor                                                                                         | Ptgrf                | 0.6 | 0.0201794   | 0.073797833 |
| 1378245_at   | similar to 6430514L14Rik protein (predicted)                                                                     | RGD1311958_predicted | 0.6 | 0.020181338 | 0.073797833 |
| 1395102_at   | potassium channel, subfamily T, member 1                                                                         | Kcnc1                | 0.6 | 0.020238892 | 0.073958963 |
| 1393054_at   | dedicator of cyto-kinesis 3 (predicted)                                                                          | Dock3_predicted      | 0.7 | 0.020272046 | 0.074047216 |
| 1390036_at   | solute carrier family 16 (monocarboxylic acid transporters), member 6                                            | Slc16a6              | 0.6 | 0.020282403 | 0.074068599 |
| 1369041_at   | neuroligin 1                                                                                                     | Nlgn1                | 0.7 | 0.02029002  | 0.074073055 |
| 1369066_at   | MAP-kinase activating death domain                                                                               | Madd                 | 0.5 | 0.020314867 | 0.074121324 |
| 1376378_at   | Putative GTP-binding protein                                                                                     | LOC293589            | 0.7 | 0.020363373 | 0.074248895 |
| 1391306_at   | Exosome component 4 (predicted)                                                                                  | Exosc4_predicted     | 0.8 | 0.020372968 | 0.074267415 |
| 1390309_a_at | Transcribed locus                                                                                                | ---                  | 0.8 | 0.020399116 | 0.074329789 |
| 1372127_at   | ubiquitin-associated protein 2 (predicted)                                                                       | Ubap2_predicted      | 0.6 | 0.020427751 | 0.07441764  |
| 1371666_at   | Transcribed locus                                                                                                | ---                  | 0.8 | 0.020441486 | 0.074451186 |
| 1376921_at   | FAD-dependent oxidoreductase domain containing 1 (predicted)                                                     | Foxred1_predicted    | 0.7 | 0.020456279 | 0.074457056 |
| 1379817_at   | purine-rich element binding protein G (predicted)                                                                | Purg_predicted       | 0.7 | 0.020462314 | 0.074457056 |
| 1395821_at   | core binding factor beta                                                                                         | Cbfb                 | 0.3 | 0.020464252 | 0.074457056 |
| 1395151_at   | Transcribed locus                                                                                                | ---                  | 0.7 | 0.020467746 | 0.074457056 |
| 1392405_at   | transcription factor Dp 2 (predicted)                                                                            | Tcfdp2_predicted     | 0.8 | 0.020519    | 0.074601351 |
| 1389256_at   | Transcribed locus                                                                                                | ---                  | 0.7 | 0.020556992 | 0.074673454 |
| 1385543_at   | Transcribed locus                                                                                                | ---                  | 0.7 | 0.02058853  | 0.074725507 |
| 1391005_at   | F-box and leucine-rich repeat protein 4 (predicted)                                                              | Fbxl4_predicted      | 0.8 | 0.020606096 | 0.074752771 |
| 1371711_at   | Transcribed locus                                                                                                | ---                  | 0.7 | 0.020633312 | 0.074834997 |
| 1376715_at   | calcium binding atopy-related autoantigen 1                                                                      | Cbara1               | 0.6 | 0.020752609 | 0.075234497 |
| 1398299_at   | Rho guanine nucleotide exchange factor (GEF) 11                                                                  | Arhgef11             | 0.8 | 0.020761181 | 0.075248987 |
| 1389309_at   | sno, strawberry notch homolog 1 (Drosophila)                                                                     | Sbno1                | 0.7 | 0.020824999 | 0.075430429 |
| 1385167_at   | exportin 5 (predicted)                                                                                           | Xpo5_predicted       | 0.8 | 0.020852727 | 0.075514235 |
| 1384270_at   | Transcribed locus                                                                                                | ---                  | 0.6 | 0.020891643 | 0.075638509 |
| 1367845_at   | neurofilament 3, medium                                                                                          | Nef3                 | 0.7 | 0.020903277 | 0.075663975 |
| 1375339_at   | enthoprotin                                                                                                      | Enth                 | 0.7 | 0.020911786 | 0.075678119 |
| 1394604_at   | Neural precursor cell expressed, developmentally down-regulated 4-like                                           | Nedd4l               | 0.8 | 0.02091916  | 0.075688152 |
| 1374327_at   | Transcribed locus                                                                                                | ---                  | 0.7 | 0.020936669 | 0.075734841 |
| 1367959_a_at | sodium channel, voltage-gated, type I, beta                                                                      | Scn1b                | 0.5 | 0.020952995 | 0.075777236 |
| 1391246_at   | dystrobrevin alpha (predicted)                                                                                   | Dtna_predicted       | 0.7 | 0.021036487 | 0.076029033 |
| 1383575_at   | catenin (cadherin-associated protein), delta 2                                                                   | Ctnnd2               | 0.7 | 0.021043853 | 0.07603895  |
| 1390020_at   | ---                                                                                                              | ---                  | 0.6 | 0.02107498  | 0.076134695 |
| 1368387_at   | 3-hydroxybutyrate dehydrogenase, type 1                                                                          | Bdh1                 | 0.7 | 0.021147518 | 0.076310277 |
| 1372498_at   | cytokine induced apoptosis inhibitor 1                                                                           | Ciapi1               | 0.7 | 0.021156059 | 0.076310277 |
| 1376718_at   | similar to CG9117-PA                                                                                             | RGD1306932           | 0.6 | 0.021189665 | 0.076399972 |
| 1398721_at   | similar to fibronectin type 3 and SPRY domain-containing protein                                                 | LOC301506            | 0.6 | 0.02121654  | 0.07646136  |
| 1374608_at   | similar to TatD DNase domain containing 2                                                                        | LOC500295            | 0.7 | 0.02123688  | 0.076501139 |
| 1373188_at   | sodium channel, voltage-gated, type IV, beta                                                                     | Scn4b                | 0.8 | 0.02132054  | 0.076763701 |

|            |                                                                                                                                                                          |                                        |     |             |             |
|------------|--------------------------------------------------------------------------------------------------------------------------------------------------------------------------|----------------------------------------|-----|-------------|-------------|
| 1379660_at | Transcribed locus                                                                                                                                                        | ---                                    | 0.7 | 0.021332946 | 0.076763701 |
| 1374287_at | paladin                                                                                                                                                                  | Palid                                  | 0.8 | 0.021335096 | 0.076763701 |
| 1382388_at | similar to hypothetical protein MGC27699 (predicted)                                                                                                                     | RGD1305013_predicted                   | 0.8 | 0.021356696 | 0.076814986 |
| 1390486_at | ubiquitin specific protease 32 (predicted)                                                                                                                               | Usp32_predicted                        | 0.6 | 0.021368182 | 0.076839496 |
| 1371402_at | ATPase, H transporting, lysosomal V1 subunit B2                                                                                                                          | Atp6v1b2                               | 0.6 | 0.021398767 | 0.076899044 |
| 1369135_at | synaptotagmin XI                                                                                                                                                         | Syt11                                  | 0.7 | 0.021410542 | 0.076909474 |
| 1369453_at | Epsin 1                                                                                                                                                                  | Epn1                                   | 0.7 | 0.021411021 | 0.076909474 |
| 1386828_at | RUN domain containing 1 (predicted)                                                                                                                                      | Rundc1_predicted                       | 0.7 | 0.021486221 | 0.077095411 |
| 1398458_at | similar to protein kinase, lysine deficient 1; kinase deficient protein (predicted)                                                                                      | RGD1307284_predicted                   | 0.8 | 0.021495369 | 0.077111413 |
| 1371103_at | RAB6A, member RAS oncogene family                                                                                                                                        | Rab6a                                  | 0.7 | 0.021566269 | 0.077281481 |
| 1383270_at | similar to hypothetical protein                                                                                                                                          | RGD1310571                             | 0.8 | 0.021645166 | 0.077462943 |
| 1388570_at | similar to RIKEN cDNA 2310005O14                                                                                                                                         | LOC498909                              | 0.8 | 0.021651368 | 0.077467036 |
| 1368515_at | erythrocyte protein band 4.1-like 3                                                                                                                                      | Epb4.1i3                               | 0.7 | 0.021655729 | 0.077467036 |
| 1393290_at | similar to myocyte enhancer factor 2C                                                                                                                                    | LOC309957                              | 0.7 | 0.021664732 | 0.077482391 |
| 1384869_at | abhydrolase domain containing 7 (predicted)                                                                                                                              | Abhd7_predicted                        | 0.6 | 0.021701743 | 0.077597885 |
| 1392507_at | Transcribed locus                                                                                                                                                        | ---                                    | 0.7 | 0.021764848 | 0.077755913 |
| 1382995_at | Neuropilin 2                                                                                                                                                             | Nrp2                                   | 0.7 | 0.021812456 | 0.077866906 |
| 1398376_at | ---                                                                                                                                                                      | ---                                    | 0.7 | 0.021854519 | 0.07789178  |
| 1375580_at | similar to Dipeptidyl peptidase 9 (Dipeptidyl peptidase IX) (DP9) (Dipeptidyl peptidase-like protein 9) (DPLP9)                                                          | LOC301130                              | 0.7 | 0.021854971 | 0.07789178  |
| 1391559_at | TLC domain containing 1                                                                                                                                                  | Tlcd1                                  | 0.6 | 0.021865806 | 0.077901662 |
| 1398910_at | STIP1 homology and U-Box containing protein 1                                                                                                                            | Stub1                                  | 0.6 | 0.021897144 | 0.077974502 |
| 1379480_at | diacylglycerol kinase, iota /// similar to diacylglycerol kinase iota-1 /// similar to Diacylglycerol kinase iota (Diglyceride kinase iota) (DGK-iota) (DAG kinase iota) | Dgki ///<br>LOC500082 ///<br>LOC688705 | 0.8 | 0.021933486 | 0.078070109 |
| 1382787_at | kinesin family member 5A                                                                                                                                                 | Kif5a                                  | 0.5 | 0.021938629 | 0.078071522 |
| 1376894_at | pallidin                                                                                                                                                                 | Pldn                                   | 0.5 | 0.021955534 | 0.078106477 |
| 1386963_at | thyroid hormone receptor interactor 10                                                                                                                                   | Trip10                                 | 0.8 | 0.021962698 | 0.078106477 |
| 1388924_at | angiopoietin-like 4                                                                                                                                                      | Angptl4                                | 0.7 | 0.021992214 | 0.078179523 |
| 1393441_at | similar to cyclin-dependent kinase inhibitor 2D                                                                                                                          | Cdkn2d                                 | 0.5 | 0.022043963 | 0.078297781 |
| 1377786_at | Transcribed locus                                                                                                                                                        | ---                                    | 0.7 | 0.022052417 | 0.078297781 |
| 1369571_at | golgi phosphoprotein 3                                                                                                                                                   | Golph3                                 | 0.6 | 0.02207099  | 0.078322252 |
| 1388384_at | Dynein light chain LC8-type 1                                                                                                                                            | Dynll1                                 | 0.8 | 0.022084701 | 0.078337105 |
| 1389386_at | ---                                                                                                                                                                      | ---                                    | 0.8 | 0.022095763 | 0.078359445 |
| 1378965_at | Transcribed locus                                                                                                                                                        | ---                                    | 0.7 | 0.022212807 | 0.078704529 |
| 1397669_at | similar to Fgfr1 oncogene partner                                                                                                                                        | LOC683722                              | 0.6 | 0.022230306 | 0.078717776 |
| 1375443_at | similar to gene trap ROSA b-geo 22                                                                                                                                       | LOC687166 ///<br>LOC691093             | 0.6 | 0.02233677  | 0.079060725 |
| 1385075_at | coiled-coil domain containing 32                                                                                                                                         | Ccdc32                                 | 0.6 | 0.022343907 | 0.079068971 |
| 1372746_at | similar to RIKEN cDNA 2810428115 (predicted)                                                                                                                             | RGD1566239_predicted                   | 0.4 | 0.022403235 | 0.079210749 |
| 1395820_at | similar to RIKEN cDNA A630007N06 gene (predicted)                                                                                                                        | RGD1304572_predicted                   | 0.7 | 0.022427068 | 0.079277975 |
| 1373954_at | similar to FLJ00052 protein (predicted)                                                                                                                                  | RGD1305986_predicted                   | 0.7 | 0.022447071 | 0.079331632 |
| 1389382_at | makorin, ring finger protein, 2                                                                                                                                          | Mkrn2                                  | 0.7 | 0.022474925 | 0.079398371 |
| 1388642_at | etoposide induced 2.4 mRNA                                                                                                                                               | Ei24                                   | 0.6 | 0.022481912 | 0.079403583 |
| 1371663_at | similar to expressed sequence AW556797 (predicted)                                                                                                                       | RGD1305138_predicted                   | 0.6 | 0.022519468 | 0.079514959 |
| 1399019_at | abhydrolase domain containing 4 (predicted)                                                                                                                              | Abhd4_predicted                        | 0.7 | 0.022559418 | 0.079591872 |
| 1372719_at | ---                                                                                                                                                                      | ---                                    | 0.7 | 0.022596613 | 0.079634717 |
| 1391045_at | diacylglycerol O-acyltransferase homolog 2 (mouse)                                                                                                                       | Dgat2                                  | 0.8 | 0.022600612 | 0.079634717 |
| 1391658_at | archain 1                                                                                                                                                                | Arcn1                                  | 0.6 | 0.02261935  | 0.079683672 |
| 1385173_at | early B-cell factor 3 (predicted)                                                                                                                                        | Ebf3_predicted                         | 0.7 | 0.022635025 | 0.079721818 |
| 1380960_at | coronin, actin binding protein 2A                                                                                                                                        | Coro2a                                 | 0.7 | 0.02264595  | 0.07973193  |
| 1374431_at | similar to ATPase, H+ transporting, V1 subunit A, isoform 1                                                                                                              | LOC685232                              | 0.8 | 0.022656427 | 0.07973193  |
| 1381686_at | similar to CG12753-PA (predicted)                                                                                                                                        | RGD1305773_predicted                   | 0.7 | 0.022657286 | 0.07973193  |
| 1397561_at | Transcribed locus                                                                                                                                                        | ---                                    | 0.7 | 0.022710134 | 0.079900808 |
| 1372826_at | ---                                                                                                                                                                      | ---                                    | 0.7 | 0.022756811 | 0.080013686 |

|              |                                                                                                                                                                                                                                                                                                                                                                                                                                                                                                                           |                                                                                                                                                                                                |     |             |             |
|--------------|---------------------------------------------------------------------------------------------------------------------------------------------------------------------------------------------------------------------------------------------------------------------------------------------------------------------------------------------------------------------------------------------------------------------------------------------------------------------------------------------------------------------------|------------------------------------------------------------------------------------------------------------------------------------------------------------------------------------------------|-----|-------------|-------------|
| 1383086_at   | Transcribed locus                                                                                                                                                                                                                                                                                                                                                                                                                                                                                                         | ---                                                                                                                                                                                            | 0.7 | 0.022904981 | 0.080380016 |
| 1396092_at   | NFKB inhibitor interacting Ras-like protein 1 (predicted)                                                                                                                                                                                                                                                                                                                                                                                                                                                                 | Nkiras1_predicted                                                                                                                                                                              | 0.4 | 0.022914887 | 0.080381691 |
| 1384408_at   | Transcribed locus                                                                                                                                                                                                                                                                                                                                                                                                                                                                                                         | ---                                                                                                                                                                                            | 0.6 | 0.022915233 | 0.080381691 |
| 1389381_at   | sequestosome 1                                                                                                                                                                                                                                                                                                                                                                                                                                                                                                            | Sqstm1                                                                                                                                                                                         | 0.5 | 0.02299317  | 0.080552003 |
| 1393274_at   | similar to PRO1853 homolog                                                                                                                                                                                                                                                                                                                                                                                                                                                                                                | RGD1311578                                                                                                                                                                                     | 0.7 | 0.023012403 | 0.080602214 |
| 1368109_at   | ST3 beta-galactoside alpha-2,3-sialyltransferase 5                                                                                                                                                                                                                                                                                                                                                                                                                                                                        | St3gal5                                                                                                                                                                                        | 0.6 | 0.023017546 | 0.080603064 |
| 1368058_at   | scaffold attachment factor B                                                                                                                                                                                                                                                                                                                                                                                                                                                                                              | Safb                                                                                                                                                                                           | 0.7 | 0.023050287 | 0.080700538 |
| 1391805_at   | similar to KIAA1900 protein (predicted)                                                                                                                                                                                                                                                                                                                                                                                                                                                                                   | RGD1310364_predicted                                                                                                                                                                           | 0.8 | 0.023081807 | 0.080793692 |
| 1387437_at   | F-box only protein 2                                                                                                                                                                                                                                                                                                                                                                                                                                                                                                      | Fbxo2                                                                                                                                                                                          | 0.4 | 0.023095667 | 0.080825006 |
| 1375672_at   | ---                                                                                                                                                                                                                                                                                                                                                                                                                                                                                                                       | ---                                                                                                                                                                                            | 0.7 | 0.023112678 | 0.080867333 |
| 1393541_at   | Transcribed locus                                                                                                                                                                                                                                                                                                                                                                                                                                                                                                         | ---                                                                                                                                                                                            | 0.7 | 0.023198353 | 0.081107783 |
| 1392829_at   | similar to cleavage stimulation factor, 3 pre-RNA subunit 2                                                                                                                                                                                                                                                                                                                                                                                                                                                               | LOC683927                                                                                                                                                                                      | 0.8 | 0.023210988 | 0.081107783 |
| 1369689_at   | N-ethylmaleimide sensitive fusion protein                                                                                                                                                                                                                                                                                                                                                                                                                                                                                 | Nsf                                                                                                                                                                                            | 0.3 | 0.023217332 | 0.081112717 |
| 1377091_at   | NG5 protein                                                                                                                                                                                                                                                                                                                                                                                                                                                                                                               | Ng5                                                                                                                                                                                            | 0.7 | 0.023232069 | 0.081146967 |
| 1390440_at   | solute carrier family 9 (sodium/hydrogen exchanger), member 6 (predicted)                                                                                                                                                                                                                                                                                                                                                                                                                                                 | Slc9a6_predicted                                                                                                                                                                               | 0.7 | 0.023263979 | 0.081206692 |
| 1372447_at   | ---                                                                                                                                                                                                                                                                                                                                                                                                                                                                                                                       | ---                                                                                                                                                                                            | 0.6 | 0.023302426 | 0.081238142 |
| 1376727_at   | Yip1 domain family, member 4                                                                                                                                                                                                                                                                                                                                                                                                                                                                                              | Yipf4                                                                                                                                                                                          | 0.5 | 0.023304004 | 0.081238142 |
| 1388437_at   | Transcribed locus                                                                                                                                                                                                                                                                                                                                                                                                                                                                                                         | ---                                                                                                                                                                                            | 0.6 | 0.02333307  | 0.081292593 |
| 1388551_at   | protocadherin gamma subfamily C, 3 ///<br>protocadherin gamma subfamily A, 9 ///<br>protocadherin gamma subfamily A, 11 ///<br>protocadherin gamma subfamily A, 7 ///<br>protocadherin gamma subfamily A, 5 ///<br>protocadherin gamma subfamily A, 8 ///<br>protocadherin gamma b7 ///<br>protocadherin gamma subfamily B, 5 ///<br>protocadherin gamma a2 ///<br>protocadherin gamma subfamily A, 3 ///<br>protocadherin gamma subfamily A, 10 ///<br>protocadherin gamma subfamily A, 12 ///<br>protocadherin gamma a1 | Pcdhga1 ///<br>Pcdhga10 ///<br>Pcdhga11 ///<br>Pcdhga12 ///<br>Pcdhga2 ///<br>Pcdhga3 ///<br>Pcdhga5 ///<br>Pcdhga7 ///<br>Pcdhga8 ///<br>Pcdhga9 ///<br>Pcdhgb5 ///<br>Pcdhgb7 ///<br>Pcdhgc3 | 0.7 | 0.023358851 | 0.081357234 |
| 1387376_at   | aldehyde oxidase 1                                                                                                                                                                                                                                                                                                                                                                                                                                                                                                        | Aox1                                                                                                                                                                                           | 0.5 | 0.023367043 | 0.081359257 |
| 1368473_at   | gap junction membrane channel protein alpha 5                                                                                                                                                                                                                                                                                                                                                                                                                                                                             | Gja5                                                                                                                                                                                           | 0.7 | 0.023403438 | 0.081468731 |
| 1379784_at   | peroxisome biogenesis factor 7                                                                                                                                                                                                                                                                                                                                                                                                                                                                                            | Pex7                                                                                                                                                                                           | 0.6 | 0.02342287  | 0.081519123 |
| 1374777_at   | hypothetical protein LOC502894                                                                                                                                                                                                                                                                                                                                                                                                                                                                                            | LOC502894                                                                                                                                                                                      | 0.7 | 0.023435912 | 0.081547255 |
| 1370606_at   | purinergic receptor P2Y, G-protein coupled 1                                                                                                                                                                                                                                                                                                                                                                                                                                                                              | P2ry1                                                                                                                                                                                          | 0.7 | 0.023459672 | 0.081612667 |
| 1389906_at   | farnesyl diphosphate farnesyl transferase 1                                                                                                                                                                                                                                                                                                                                                                                                                                                                               | Fdft1                                                                                                                                                                                          | 0.6 | 0.023478586 | 0.081643928 |
| 1374512_at   | similar to CG9886-like                                                                                                                                                                                                                                                                                                                                                                                                                                                                                                    | LOC684314                                                                                                                                                                                      | 0.8 | 0.023509405 | 0.081733819 |
| 1373974_at   | oxysterol binding protein (predicted)                                                                                                                                                                                                                                                                                                                                                                                                                                                                                     | Osbp_predicted                                                                                                                                                                                 | 0.7 | 0.023545368 | 0.081789697 |
| 1371881_at   | zinc finger, HIT domain containing 2 (predicted)                                                                                                                                                                                                                                                                                                                                                                                                                                                                          | Znhit2_predicted                                                                                                                                                                               | 0.6 | 0.023611466 | 0.081984672 |
| 1394738_at   | Transcribed locus                                                                                                                                                                                                                                                                                                                                                                                                                                                                                                         | ---                                                                                                                                                                                            | 0.6 | 0.02365211  | 0.082091137 |
| 1393765_at   | Transcribed locus                                                                                                                                                                                                                                                                                                                                                                                                                                                                                                         | ---                                                                                                                                                                                            | 0.8 | 0.023704036 | 0.082197308 |
| 1398251_a_at | calcium/calmodulin-dependent protein kinase II, beta                                                                                                                                                                                                                                                                                                                                                                                                                                                                      | Camk2b                                                                                                                                                                                         | 0.7 | 0.023707687 | 0.082197308 |
| 1374215_at   | pleckstrin homology domain containing, family J member 1                                                                                                                                                                                                                                                                                                                                                                                                                                                                  | Plekhj1                                                                                                                                                                                        | 0.7 | 0.023727708 | 0.082214732 |
| 1387341_a_at | myelin basic protein                                                                                                                                                                                                                                                                                                                                                                                                                                                                                                      | Mbp                                                                                                                                                                                            | 0.6 | 0.02376368  | 0.082304699 |
| 1397555_at   | ---                                                                                                                                                                                                                                                                                                                                                                                                                                                                                                                       | ---                                                                                                                                                                                            | 0.7 | 0.02380929  | 0.082427954 |
| 1395736_at   | receptor interacting protein kinase 5                                                                                                                                                                                                                                                                                                                                                                                                                                                                                     | Ripk5                                                                                                                                                                                          | 0.5 | 0.023847931 | 0.082509627 |
| 1371674_at   | kelch domain containing 3                                                                                                                                                                                                                                                                                                                                                                                                                                                                                                 | Klhdc3                                                                                                                                                                                         | 0.7 | 0.023878791 | 0.082591817 |
| 1393510_at   | similar to RIKEN cDNA 5730410E15 gene (predicted)                                                                                                                                                                                                                                                                                                                                                                                                                                                                         | RGD1564335_predicted                                                                                                                                                                           | 0.8 | 0.023881729 | 0.082591817 |
| 1370519_at   | syntaxin binding protein 1                                                                                                                                                                                                                                                                                                                                                                                                                                                                                                | Stxbp1                                                                                                                                                                                         | 0.8 | 0.023961798 | 0.082851304 |
| 1371980_at   | ATPase family, AAA domain containing 3A                                                                                                                                                                                                                                                                                                                                                                                                                                                                                   | Atad3a                                                                                                                                                                                         | 0.7 | 0.024016019 | 0.082969013 |
| 1374637_at   | similar to hypothetical protein PRO1580 (predicted)                                                                                                                                                                                                                                                                                                                                                                                                                                                                       | RGD1309263_predicted                                                                                                                                                                           | 0.7 | 0.024048293 | 0.08303879  |
| 1392773_at   | proprotein convertase subtilisin/kexin type 5                                                                                                                                                                                                                                                                                                                                                                                                                                                                             | Pcsk5                                                                                                                                                                                          | 0.8 | 0.02408554  | 0.083121897 |
| 1367887_at   | lecithin cholesterol acyltransferase                                                                                                                                                                                                                                                                                                                                                                                                                                                                                      | Lcat                                                                                                                                                                                           | 0.6 | 0.024100156 | 0.083131787 |
| 1375574_at   | golgi associated, gamma adaptin ear containing, ARF binding protein 3 (predicted)                                                                                                                                                                                                                                                                                                                                                                                                                                         | Gga3_predicted                                                                                                                                                                                 | 0.6 | 0.024136745 | 0.083211315 |
| 1393620_at   | sestrin 3 (predicted)                                                                                                                                                                                                                                                                                                                                                                                                                                                                                                     | Sesn3_predicted                                                                                                                                                                                | 0.7 | 0.024157699 | 0.083248656 |
| 1368868_at   | A kinase (PRKA) anchor protein (gravin) 12                                                                                                                                                                                                                                                                                                                                                                                                                                                                                | Akap12                                                                                                                                                                                         | 0.6 | 0.024207939 | 0.083350794 |

|              |                                                                                                                                 |                      |     |             |             |
|--------------|---------------------------------------------------------------------------------------------------------------------------------|----------------------|-----|-------------|-------------|
| 1391725_at   | Transcribed locus                                                                                                               | ---                  | 0.8 | 0.024251386 | 0.083449122 |
| 1372923_at   | peroxisomal biogenesis factor 11b                                                                                               | Pex11b               | 0.8 | 0.024294699 | 0.083554007 |
| 1392999_at   | neuropilin (NRP) and tolloid (TLL)-like 2 (predicted)                                                                           | Neto2_predicted      | 0.7 | 0.024297107 | 0.083554007 |
| 1382527_at   | Transcribed locus                                                                                                               | ---                  | 0.4 | 0.024308782 | 0.083576683 |
| 1372158_at   | LRP16 protein                                                                                                                   | Lrp16                | 0.6 | 0.02435259  | 0.083674378 |
| 1386943_at   | plasma membrane proteolipid                                                                                                     | Plp                  | 0.6 | 0.024413493 | 0.083849058 |
| 1387356_at   | Wolfram syndrome 1 homolog (human)                                                                                              | Wfs1                 | 0.6 | 0.024430449 | 0.083872266 |
| 1368061_at   | potassium voltage-gated channel, subfamily H (eag-related), member 1                                                            | Kcnh1                | 0.8 | 0.024451226 | 0.083918635 |
| 1369637_at   | kinesin family member 3C                                                                                                        | Kif3c                | 0.6 | 0.02445416  | 0.083918635 |
| 1370052_at   | 3-phosphoinositide dependent protein kinase-1                                                                                   | Pdpk1                | 0.7 | 0.024504914 | 0.084022687 |
| 1395412_at   | GPI-anchored membrane protein 1                                                                                                 | Gpiap1               | 0.5 | 0.024529121 | 0.084078886 |
| 1387966_at   | asparaginase like 1                                                                                                             | Asrgl1               | 0.7 | 0.024539712 | 0.084089413 |
| 1370833_at   | peroxin 2                                                                                                                       | Pex2                 | 0.6 | 0.024552119 | 0.084114403 |
| 1384437_at   | SWI/SNF related, matrix associated, actin dependent regulator of chromatin, subfamily a, member 1 (predicted)                   | Smarca1_predicted    | 0.7 | 0.024584223 | 0.084206852 |
| 1387670_at   | glycerol-3-phosphate dehydrogenase 2, mitochondrial                                                                             | Gpd2                 | 0.5 | 0.024604167 | 0.084257617 |
| 1387299_at   | Msx-interacting-zinc finger                                                                                                     | Miz1                 | 0.7 | 0.024652076 | 0.084386546 |
| 1380335_at   | Transcribed locus                                                                                                               | ---                  | 0.8 | 0.024755449 | 0.084687402 |
| 1376679_at   | Transcribed locus                                                                                                               | ---                  | 0.5 | 0.024834284 | 0.084904242 |
| 1389969_at   | translocase of outer mitochondrial membrane 40 homolog (yeast)                                                                  | Tomm40               | 0.6 | 0.024882287 | 0.085033005 |
| 1373045_at   | potassium channel tetramerisation domain containing 13                                                                          | Kctd13               | 0.6 | 0.024944115 | 0.08522659  |
| 1373551_at   | similar to KIAA0614 protein (predicted)                                                                                         | RGD1309762_predicted | 0.8 | 0.025029281 | 0.08544005  |
| 1379637_at   | similar to c-myc promoter binding protein (predicted)                                                                           | RGD1562639_predicted | 0.7 | 0.025083347 | 0.085575671 |
| 1383259_at   | Transcribed locus                                                                                                               | ---                  | 0.8 | 0.025163626 | 0.085760187 |
| 1392463_at   | similar to hypothetical protein FLJ14503 (predicted)                                                                            | RGD1564852_predicted | 0.7 | 0.025172552 | 0.085760187 |
| 1368074_at   | galactose-4-epimerase, UDP                                                                                                      | Gale                 | 0.6 | 0.025173284 | 0.085760187 |
| 1375289_at   | ---                                                                                                                             | ---                  | 0.8 | 0.025180734 | 0.085767801 |
| 1373874_at   | sphingosine-1-phosphate phosphatase 1                                                                                           | Sgpp1                | 0.7 | 0.025259076 | 0.085963436 |
| 1391853_at   | Transcribed locus                                                                                                               | ---                  | 0.6 | 0.025295644 | 0.086070078 |
| 1371966_at   | protein-L-isoaspartate (D-aspartate) O-methyltransferase 1                                                                      | Pcmt1                | 0.7 | 0.025317386 | 0.08612624  |
| 1371828_at   | similar to RIKEN cDNA 1500011H22                                                                                                | RGD1310861           | 0.4 | 0.025338742 | 0.086176293 |
| 1381976_at   | kinesin family member 21A (predicted)                                                                                           | Kif21a_predicted     | 0.7 | 0.025342578 | 0.086176293 |
| 1383289_at   | Ngg1 interacting factor 3-like 1 (S. pombe)                                                                                     | Nif3l1               | 0.7 | 0.025362265 | 0.08619851  |
| 1371726_at   | Transcribed locus                                                                                                               | ---                  | 0.8 | 0.025364834 | 0.08619851  |
| 1382028_at   | similar to Peroxisomal biogenesis factor 19 (Peroxin-19) (Peroxisomal farnesylated protein) /// peroxisome biogenesis factor 19 | LOC289233 /// Pex19  | 0.7 | 0.025387125 | 0.086238626 |
| 1380348_at   | wingless related MMTV integration site 9A (predicted)                                                                           | Wnt9a_predicted      | 0.7 | 0.025409787 | 0.086297787 |
| 1385560_at   | ---                                                                                                                             | ---                  | 0.7 | 0.025444601 | 0.086344709 |
| 1389448_at   | septin 4                                                                                                                        | Sep-04               | 0.5 | 0.025510146 | 0.086531425 |
| 1390255_at   | similar to mKIAA0843 protein (predicted)                                                                                        | RGD1565118_predicted | 0.8 | 0.025544547 | 0.086630249 |
| 1379684_at   | Hypothetical protein LOC681219                                                                                                  | LOC681219            | 0.7 | 0.025611515 | 0.086803669 |
| 1388940_at   | similar to Rho-GTPase-activating protein 25 (predicted)                                                                         | RGD1562105_predicted | 0.8 | 0.025693647 | 0.086992404 |
| 1383913_at   | ---                                                                                                                             | ---                  | 0.6 | 0.025707611 | 0.086998315 |
| 1383159_at   | Transcribed locus                                                                                                               | ---                  | 0.6 | 0.025716549 | 0.086998315 |
| 1398375_at   | metastasis associated 3 (predicted)                                                                                             | Mta3_predicted       | 0.6 | 0.025738648 | 0.087037269 |
| 1370893_at   | acetyl-coenzyme A carboxylase alpha                                                                                             | Acaca                | 0.8 | 0.025782918 | 0.087169053 |
| 1375182_at   | Solute carrier family 3, member 1                                                                                               | Slc3a1               | 0.4 | 0.025799163 | 0.087200254 |
| 1378606_at   | ---                                                                                                                             | ---                  | 0.7 | 0.025856101 | 0.087344659 |
| 1372921_at   | Transcribed locus                                                                                                               | ---                  | 0.8 | 0.025897369 | 0.087412256 |
| 1379943_at   | Transcribed locus                                                                                                               | ---                  | 0.7 | 0.025914048 | 0.087450606 |
| 1371709_at   | mitochondrial ribosomal protein L3 (predicted)                                                                                  | Mrp13_predicted      | 0.7 | 0.025929212 | 0.087465891 |
| 1387199_a_at | Cdc42 guanine nucleotide exchange factor (GEF) 9                                                                                | Arhgef9              | 0.6 | 0.02594944  | 0.087516176 |
| 1371922_at   | Transcribed locus                                                                                                               | ---                  | 0.7 | 0.02597347  | 0.087573024 |
| 1392558_at   | Transcribed locus                                                                                                               | ---                  | 0.8 | 0.026041294 | 0.087736009 |



|              |                                                                                               |                      |     |             |             |
|--------------|-----------------------------------------------------------------------------------------------|----------------------|-----|-------------|-------------|
| 1383547_at   | similar to neuropathy target esterase homolog (predicted)                                     | RGD1564611_predicted | 0.8 | 0.026061049 | 0.087776875 |
| 1390311_at   | Tubulin tyrosine ligase                                                                       | Ttl                  | 0.7 | 0.026084663 | 0.087810181 |
| 1377933_at   | solute carrier family 39 (zinc transporter), member 3                                         | Slc39a3              | 0.6 | 0.026102847 | 0.087846617 |
| 1372831_at   | Transcribed locus                                                                             | ---                  | 0.7 | 0.026106169 | 0.087846617 |
| 1369249_at   | progressive ankylosis homolog (mouse)                                                         | Ank                  | 0.7 | 0.026121557 | 0.087862717 |
| 1373158_at   | Transcribed locus                                                                             | ---                  | 0.6 | 0.02614335  | 0.087911873 |
| 1367892_at   | pyruvate dehydrogenase kinase, isoenzyme 2                                                    | Pdk2                 | 0.8 | 0.026202625 | 0.088045102 |
| 1387091_at   | peptidyl arginine deiminase, type II                                                          | Padi2                | 0.7 | 0.02626387  | 0.088196843 |
| 1384525_at   | dedicator of cytokinesis 11                                                                   | Dock11               | 0.8 | 0.026361439 | 0.088506419 |
| 1380465_at   | ---                                                                                           | ---                  | 0.7 | 0.026394567 | 0.088545346 |
| 1379013_at   | similar to mKIAA1402 protein (predicted)                                                      | RGD1306404_predicted | 0.8 | 0.026401188 | 0.088549498 |
| 1368991_at   | sphingomyelin phosphodiesterase 3, neutral                                                    | Smpd3                | 0.8 | 0.026431432 | 0.088614797 |
| 1377839_at   | ---                                                                                           | ---                  | 0.6 | 0.026437366 | 0.08861663  |
| 1388243_at   | G protein-coupled receptor 176                                                                | Gpr176               | 0.7 | 0.026452354 | 0.088648801 |
| 1372527_at   | reticulum 2 (Z-band associated protein)                                                       | Rtn2                 | 0.6 | 0.026461226 | 0.088660469 |
| 1374807_at   | similar to RIKEN cDNA 1810063B07 gene (predicted)                                             | RGD1310877_predicted | 0.8 | 0.026511779 | 0.088793677 |
| 1376240_at   | similar to MYST histone acetyltransferase monocytic leukemia 4 (predicted)                    | RGD1566399_predicted | 0.7 | 0.026547732 | 0.088895989 |
| 1398616_at   | adaptor-related protein complex 1, sigma 2 subunit (predicted)                                | Ap1s2_predicted      | 0.8 | 0.026689443 | 0.08922597  |
| 1395530_at   | Transcribed locus                                                                             | ---                  | 0.8 | 0.026689675 | 0.08922597  |
| 1398489_at   | ---                                                                                           | ---                  | 0.6 | 0.026883262 | 0.089800142 |
| 1372287_at   | myotubularin related protein 6 (predicted)                                                    | Mtmr6_predicted      | 0.8 | 0.026891475 | 0.089809335 |
| 1384038_at   | Transcribed locus                                                                             | ---                  | 0.6 | 0.026934528 | 0.08989836  |
| 1394393_at   | ubiquitin specific protease 7 (herpes virus-associated)                                       | Usp7                 | 0.6 | 0.027014456 | 0.090092005 |
| 1372191_at   | Transcribed locus                                                                             | ---                  | 0.7 | 0.027049209 | 0.09017134  |
| 1387782_at   | dynein light chain LC8-type 2                                                                 | Dynll2               | 0.5 | 0.027075638 | 0.090241155 |
| 1391944_at   | ---                                                                                           | ---                  | 0.7 | 0.027090258 | 0.090271589 |
| 1394793_at   | ---                                                                                           | ---                  | 0.8 | 0.027111426 | 0.090315756 |
| 1388525_at   | similar to HGFL protein                                                                       | RGD1311203           | 0.5 | 0.027141714 | 0.090388119 |
| 1382320_at   | LOC362793                                                                                     | RGD1307315           | 0.8 | 0.027153071 | 0.090407632 |
| 1377941_at   | Ubiquitin specific protease 20 (predicted)                                                    | Usp20_predicted      | 0.7 | 0.027163131 | 0.090416693 |
| 1398351_at   | Ubiquitin specific protease 7 (herpes virus-associated)                                       | Usp7                 | 0.8 | 0.027208552 | 0.090463047 |
| 1373844_at   | protein phosphatase methylesterase 1                                                          | Ppme1                | 0.7 | 0.027208708 | 0.090463047 |
| 1384953_at   | protein tyrosine phosphatase, receptor type, M                                                | Ptpm                 | 0.8 | 0.027213713 | 0.090463047 |
| 1377493_at   | mitochondrial translation optimization 1 homolog (S. cerevisiae) (predicted)                  | Mto1_predicted       | 0.7 | 0.027248337 | 0.090517115 |
| 1372895_at   | similar to RIKEN cDNA 5730469M10                                                              | RGD1309676           | 0.7 | 0.027303103 | 0.090629923 |
| 1374596_at   | similar to RIKEN cDNA 1810043G02; DNA segment, Chr 10, Johns Hopkins University 13, expressed | RGD1309594           | 0.8 | 0.027304484 | 0.090629923 |
| 1382261_at   | similar to CG8841-PA (predicted)                                                              | RGD1311422_predicted | 0.7 | 0.027310457 | 0.090629923 |
| 1369027_at   | alpha 1,4-galactosyltransferase                                                               | A4galt               | 0.5 | 0.027313505 | 0.090629923 |
| 1377149_at   | ---                                                                                           | ---                  | 0.7 | 0.027325643 | 0.09065191  |
| 1385713_at   | A kinase (PRKA) anchor protein 8-like                                                         | Akap8l               | 0.5 | 0.027424159 | 0.090901272 |
| 1385681_at   | similar to RIKEN cDNA 5430437P03                                                              | MGC94542             | 0.7 | 0.027428442 | 0.090901272 |
| 1376619_at   | similar to protein tyrosine phosphatase, receptor type, D (predicted)                         | RGD1561090_predicted | 0.8 | 0.027448409 | 0.090949119 |
| 1370607_a_at | neuregulin 1                                                                                  | Nrg1                 | 0.7 | 0.027483348 | 0.091002001 |
| 1386960_at   | solute carrier family 37 (glycerol-6-phosphate transporter), member 4                         | Slc37a4              | 0.6 | 0.027486499 | 0.091002001 |
| 1383328_x_at | ---                                                                                           | ---                  | 0.7 | 0.027535062 | 0.091052814 |
| 1372707_at   | RAB6A, member RAS oncogene family                                                             | Rab6a                | 0.7 | 0.027551842 | 0.091054542 |
| 1398247_at   | protease, serine, 15                                                                          | Prss15               | 0.5 | 0.027552192 | 0.091054542 |
| 1373915_at   | dystrophia myotonica-protein kinase (predicted)                                               | Dmpk_predicted       | 0.6 | 0.027558457 | 0.09105695  |
| 1377669_at   | RAB27A, member RAS oncogene family                                                            | Rab27a               | 0.6 | 0.027585028 | 0.09112644  |
| 1391007_s_at | potassium inwardly rectifying channel, subfamily J, member 11                                 | Kcnj11               | 0.7 | 0.027610938 | 0.091193718 |
| 1392982_at   | Transcribed locus                                                                             | ---                  | 0.8 | 0.027660344 | 0.091301895 |
| 1370809_at   | tubulin, gamma 1                                                                              | Tubg1                | 0.6 | 0.027682301 | 0.09133771  |

|              |                                                                                                                                                    |                                     |     |             |             |
|--------------|----------------------------------------------------------------------------------------------------------------------------------------------------|-------------------------------------|-----|-------------|-------------|
| 1389334_at   | NADH dehydrogenase (ubiquinone) 1 alpha subcomplex 10 /// NADH dehydrogenase 1 alpha subcomplex 10-like protein /// hypothetical protein LOC678759 | LOC316632 /// LOC678759 /// Ndufa10 | 0.7 | 0.027697999 | 0.091371178 |
| 1397575_at   | similar to RIKEN cDNA D930015E06 /// similar to KIAA0922 protein                                                                                   | LOC679811 /// LOC683642             | 0.8 | 0.027796798 | 0.091592188 |
| 1376564_at   | spectrin beta 4                                                                                                                                    | Spnb4                               | 0.7 | 0.027796969 | 0.091592188 |
| 1387940_at   | eukaryotic translation initiation factor 2B, subunit 5 epsilon                                                                                     | Eif2b5                              | 0.5 | 0.027799921 | 0.091592188 |
| 1388948_at   | START domain containing 10                                                                                                                         | Stard10                             | 0.6 | 0.027863691 | 0.091733785 |
| 1367704_at   | adaptor-related protein complex 2, beta 1 subunit                                                                                                  | Ap2b1                               | 0.7 | 0.027925288 | 0.091881404 |
| 1368541_at   | embigin                                                                                                                                            | Emb                                 | 0.8 | 0.027937466 | 0.091903088 |
| 1383895_at   | dynein light chain roadblock-type 2 (predicted)                                                                                                    | Dynlrb2_predicted                   | 0.7 | 0.027946199 | 0.091913434 |
| 1376946_at   | Transcribed locus                                                                                                                                  | ---                                 | 0.8 | 0.027963126 | 0.091950719 |
| 1372925_at   | sirtuin 3 (silent mating type information regulation 2, homolog) 3 (S. cerevisiae) (predicted)                                                     | Sirt3_predicted                     | 0.7 | 0.027974801 | 0.091958242 |
| 1379932_at   | putative chloride channel 4-2                                                                                                                      | Clcn4-2                             | 0.5 | 0.027976596 | 0.091958242 |
| 1373120_at   | Transcribed locus, strongly similar to NP_446127.3 associated 2 [Rattus norvegicus]                                                                | ---                                 | 0.7 | 0.028046733 | 0.092119875 |
| 1391855_at   | Similar to B-cell CLL/lymphoma 7A                                                                                                                  | LOC690085                           | 0.7 | 0.02806972  | 0.092135453 |
| 1398740_at   | Transcribed locus                                                                                                                                  | ---                                 | 0.7 | 0.028076315 | 0.092138712 |
| 1382367_at   | NADH dehydrogenase (ubiquinone) 1 beta subcomplex, 7 (predicted)                                                                                   | Ndufb7_predicted                    | 0.8 | 0.028092997 | 0.092175066 |
| 1374447_at   | ubiquitin specific peptidase 9, X chromosome (predicted)                                                                                           | Usp9x_predicted                     | 0.7 | 0.02811762  | 0.092237458 |
| 1388598_at   | hypothetical protein LOC691995                                                                                                                     | LOC691995                           | 0.6 | 0.028186513 | 0.092352942 |
| 1388795_at   | Transcribed locus                                                                                                                                  | ---                                 | 0.8 | 0.028237475 | 0.092483071 |
| 1372616_at   | tripartite motif protein 36 (predicted)                                                                                                            | Trim36_predicted                    | 0.6 | 0.028249136 | 0.09248982  |
| 1373512_at   | ilvB (bacterial acetolactate synthase)-like (predicted)                                                                                            | Ilvbl_predicted                     | 0.6 | 0.028329141 | 0.092654147 |
| 1373208_at   | Transcribed locus                                                                                                                                  | ---                                 | 0.6 | 0.028351919 | 0.092692973 |
| 1385503_at   | similar to O-acetyltransferase                                                                                                                     | LOC678772                           | 0.8 | 0.028415276 | 0.092806684 |
| 1381986_at   | neuron navigator 1 (predicted) /// similar to neuron navigator 1                                                                                   | LOC685707 /// Nav1_predicted        | 0.6 | 0.028423107 | 0.092813831 |
| 1371115_at   | protein tyrosine phosphatase, receptor type, E                                                                                                     | Ptpre                               | 0.8 | 0.028443917 | 0.092852485 |
| 1371877_at   | similar to MYLE protein (Dexamethasone-induced protein) (predicted)                                                                                | RGD1564938_predicted                | 0.6 | 0.028464792 | 0.092852485 |
| 1372899_at   | Solute carrier family 9 (sodium/hydrogen exchanger), member 8                                                                                      | Slc9a8                              | 0.8 | 0.028465007 | 0.092852485 |
| 1397596_at   | tripartite motif protein 2                                                                                                                         | Trim2                               | 0.4 | 0.028468532 | 0.092852485 |
| 1377638_at   | Bwk1 leukemia-related gene                                                                                                                         | Bwk1                                | 0.8 | 0.028468816 | 0.092852485 |
| 1385191_at   | Transcribed locus                                                                                                                                  | ---                                 | 0.7 | 0.028488863 | 0.092899448 |
| 1369886_a_at | calcium binding protein 1                                                                                                                          | Cabp1                               | 0.5 | 0.028511827 | 0.092917696 |
| 1371609_at   | homolog of zebrafish ES1                                                                                                                           | RGD1303003                          | 0.7 | 0.028532981 | 0.092932765 |
| 1377028_at   | Transcribed locus                                                                                                                                  | ---                                 | 0.8 | 0.028564681 | 0.093017595 |
| 1367521_at   | ---                                                                                                                                                | ---                                 | 0.8 | 0.028760117 | 0.09343329  |
| 1385852_at   | CREB binding protein                                                                                                                               | Crebbp                              | 0.6 | 0.028786622 | 0.093499677 |
| 1382118_at   | Transcribed locus, strongly similar to NP_001029332.1 protein LOC619476 [Rattus norvegicus]                                                        | ---                                 | 0.8 | 0.028795485 | 0.093509996 |
| 1372751_at   | Transcribed locus, strongly similar to XP_580137.1 hypothetical protein XP_580137 [Rattus norvegicus]                                              | ---                                 | 0.7 | 0.028861389 | 0.093650055 |
| 1390144_at   | similar to RIKEN cDNA 3110043O21                                                                                                                   | RGD1359108                          | 0.7 | 0.028889057 | 0.093691704 |
| 1372724_at   | glutamate receptor, ionotropic, N-methyl D-aspartate-associated protein 1 (glutamate binding)                                                      | Grina                               | 0.4 | 0.028957578 | 0.093888084 |
| 1389116_at   | myotubularin related protein 9                                                                                                                     | Mtmr9                               | 0.6 | 0.028969585 | 0.093893609 |
| 1387427_at   | RAD50 homolog (S. cerevisiae)                                                                                                                      | Rad50                               | 0.7 | 0.028977185 | 0.093896128 |
| 1398417_at   | feminization 1 homolog a (C. elegans)                                                                                                              | Fem1a                               | 0.7 | 0.029019318 | 0.093995618 |
| 1368114_at   | fibroblast growth factor 13                                                                                                                        | Fgf13                               | 0.7 | 0.02902609  | 0.093999042 |
| 1373780_at   | tetraspanin 1                                                                                                                                      | Tspan1                              | 0.6 | 0.029036252 | 0.09401344  |
| 1369405_a_at | cholinergic receptor, nicotinic, beta polypeptide 4                                                                                                | Chrb4                               | 0.7 | 0.029066193 | 0.094073345 |

|              |                                                                                                                                  |                                                             |     |             |             |
|--------------|----------------------------------------------------------------------------------------------------------------------------------|-------------------------------------------------------------|-----|-------------|-------------|
| 1372458_at   | similar to SET domain-containing protein                                                                                         | LOC498178 ///<br>LOC687538 ///<br>LOC689820                 | 0.7 | 0.029072557 | 0.094075432 |
| 1378343_at   | tuftelin interacting protein 11                                                                                                  | Tfip11                                                      | 0.8 | 0.029113548 | 0.094189542 |
| 1389476_at   | similar to RIKEN cDNA D630029K19                                                                                                 | RGD1307100                                                  | 0.7 | 0.02918655  | 0.094388591 |
| 1371876_at   | tumor necrosis factor superfamily, member 5-induced protein 1 (predicted)                                                        | Tnfsf5ip1_predicted                                         | 0.8 | 0.029224925 | 0.094469205 |
| 1382655_at   | Transcribed locus                                                                                                                | ---                                                         | 0.7 | 0.029235637 | 0.094469205 |
| 1382104_at   | ---                                                                                                                              | ---                                                         | 0.7 | 0.029259509 | 0.094510419 |
| 1383471_at   | similar to RIKEN cDNA 1200006F02                                                                                                 | RGD1307594                                                  | 0.6 | 0.02927899  | 0.094538836 |
| 1388595_at   | DEAH (Asp-Glu-Ala-His) box polypeptide 30                                                                                        | Dhx30                                                       | 0.6 | 0.029338488 | 0.094675193 |
| 1394433_at   | katanin p60 subunit A-like 1                                                                                                     | Katnal1                                                     | 0.6 | 0.029382875 | 0.094777665 |
| 1372636_at   | Rab40c, member RAS oncogene family                                                                                               | Rab40c                                                      | 0.8 | 0.02938753  | 0.094777665 |
| 1397414_at   | ---                                                                                                                              | ---                                                         | 0.7 | 0.029406209 | 0.094819316 |
| 1367462_at   | calpain, small subunit 1                                                                                                         | Capns1                                                      | 0.3 | 0.029429857 | 0.094858317 |
| 1391071_at   | Transcribed locus, weakly similar to XP_001166661.1 synaptic vesicle glycoprotein 2 isoform 1 [Pan troglodytes]                  | ---                                                         | 0.7 | 0.029431974 | 0.094858317 |
| 1374844_at   | RNA binding motif protein 14                                                                                                     | Rbm14                                                       | 0.6 | 0.029450722 | 0.094888439 |
| 1393909_at   | similar to KIAA1841 protein (predicted)                                                                                          | RGD1305110_predicted                                        | 0.7 | 0.029456692 | 0.094889084 |
| 1386973_a_at | mitogen activated protein kinase 8 interacting protein                                                                           | Mapk8ip                                                     | 0.7 | 0.029462809 | 0.094890205 |
| 1394117_at   | Transcribed locus, moderately similar to XP_001167874.1 damage-specific DNA binding protein 2 (48kD) isoform 5 [Pan troglodytes] | ---                                                         | 0.8 | 0.029510194 | 0.0950054   |
| 1367520_at   | apolipoprotein A-I binding protein (predicted)                                                                                   | Apoa1bp_predicted                                           | 0.6 | 0.029510623 | 0.0950054   |
| 1371388_at   | pyruvate dehydrogenase (lipoamide) beta                                                                                          | Pdhb                                                        | 0.7 | 0.029515904 | 0.0950054   |
| 1374161_at   | similar to importin 11                                                                                                           | LOC314407 ///<br>LOC683400 ///<br>LOC683676                 | 0.6 | 0.029528034 | 0.095025846 |
| 1383704_at   | similar to actin-related protein 3-beta (predicted)                                                                              | RGD1565759_predicted                                        | 0.7 | 0.029548639 | 0.095073555 |
| 1387388_at   | calcium binding protein p22 /// similar to calcium binding protein P22 (predicted)                                               | Chp ///<br>RGD1564956_predicted ///<br>RGD1565588_predicted | 0.6 | 0.029646964 | 0.095282895 |
| 1379900_at   | Transcribed locus                                                                                                                | ---                                                         | 0.8 | 0.029649291 | 0.095282895 |
| 1379654_at   | GLY-YIG domain containing 2                                                                                                      | Giyd2                                                       | 0.6 | 0.029653227 | 0.095282895 |
| 1377047_at   | Transcribed locus, strongly similar to XP_219005.3 similar to tRNA nucleotidyl transferase, CCA-adding, 1 [Rattus norvegicus]    | ---                                                         | 0.7 | 0.029678631 | 0.095323984 |
| 1399049_at   | similar to RIKEN cDNA 1200003C05 (predicted)                                                                                     | RGD1308917_predicted                                        | 0.8 | 0.029751902 | 0.095468091 |
| 1389221_at   | monocyte to macrophage differentiation-associated 2 (predicted)                                                                  | Mmd2_predicted                                              | 0.7 | 0.029752519 | 0.095468091 |
| 1394700_at   | Interleukin 12 receptor, beta 2                                                                                                  | Il12rb2                                                     | 0.7 | 0.029784356 | 0.095532974 |
| 1387962_at   | zinc finger protein 180                                                                                                          | Zfp180                                                      | 0.6 | 0.029804461 | 0.095576323 |
| 1371374_at   | MAF1 homolog (S. cerevisiae)                                                                                                     | Maf1                                                        | 0.5 | 0.029862283 | 0.095708268 |
| 1390330_at   | Transmembrane protein 60 (predicted)                                                                                             | Tmem60_predicted                                            | 0.8 | 0.029905745 | 0.095810226 |
| 1372557_at   | ADP-ribosylation factor-like 6 (predicted)                                                                                       | Arl6_predicted                                              | 0.8 | 0.029932028 | 0.095819958 |
| 1389788_at   | similar to hypothetical protein                                                                                                  | RGD1307336                                                  | 0.6 | 0.029932085 | 0.095819958 |
| 1389251_at   | nudix (nucleoside diphosphate linked moiety X)-type motif 7 (predicted)                                                          | Nudt7_predicted                                             | 0.7 | 0.029979897 | 0.095898357 |

**Supplementary table 5:** Comparison of microarray and known regulation data for genes whose expression pattern within the DRG following nerve injury has been studied previously

| Gene Title                                                                                          | Gene Symbol   | SNT      | gp120+ ddC | Valder et al, 2003 | Wang et al, 2002 | Probe Set ID |
|-----------------------------------------------------------------------------------------------------|---------------|----------|------------|--------------------|------------------|--------------|
| <b>Cell-cell communication and signalling related genes</b>                                         |               |          |            |                    |                  |              |
| adenosine kinase                                                                                    | Adk           |          |            | ↓ (2-3)            |                  | 1369629_at   |
| ATPase, Na <sup>+</sup> /K <sup>+</sup> transporting, beta 3 polypeptide/Na K-ATPase beta-3 subunit | Atp1b3        | ↓ (1.6)  |            | ↓ (2-3)            |                  | 1398300_at   |
| Ca <sup>2+</sup> -dependent activator protein for secretion                                         | Cadps         | ↓ (1.6)  |            | ↓ (2-3)            |                  | 1368523_at   |
| calcium/calmodulin-dependent protein kinase II gamma                                                | Camk2g        | ↓ (2.1)  |            | ↓ (2-3)            |                  | 1369993_at   |
| creatine kinase, mitochondrial 1, ubiquitous                                                        | Ckmt1         | ↓ (3.1)  |            | ↓ (2-4)            | ↓ (2.0)          | 1390566_a_at |
| diacylglycerol kinase zeta                                                                          | Dgkz          | ↓ (2.8)  |            | ↓ (3-5)            |                  | 1367745_at   |
| mitogen activated protein kinase kinase 12                                                          | Map3k12 /MUK  | ↓ (1.5)  |            | ↓ (2-5)            |                  | 1368886_at   |
| ATPase, Na <sup>+</sup> /K <sup>+</sup> transporting, alpha 1 polypeptide truncated isoform         | Nkaa1b        | ↓ (4.6)  |            | ↓ (3-34)           |                  | 1371108_a_at |
| phosphofructokinase, platelet                                                                       | Pfkp          |          |            | ↓ (2-4)            |                  | 1372182_at   |
| protein phosphatase 1, regulatory (inhibitor) subunit 1A                                            | Ppp1r1a       |          |            | ↓ (3-5)            |                  | 1386968_at   |
| protein phosphatase 1, regulatory (inhibitor) subunit 2                                             | Ppp1r2        | ↓ (2.6)  |            | ↓ (2-15)           |                  | 1383180_at   |
| protein phosphatase 2 (formerly 2A), regulatory subunit A (PR 65), alpha isoform                    | Ppp2r1a       |          |            | ↓ (2-3)            |                  | 1375245_at   |
| protein kinase C, epsilon                                                                           | Prkce         | ↓ (1.85) | ↑ (1.2)    | ↓ (2-11)           |                  | 1374593_at   |
| putative protein kinase C regulatory protein                                                        | Ywhag         |          |            | ↓ (2-4)            |                  | 1386866_at   |
| <b>Cell cycle / cell death related</b>                                                              |               |          |            |                    |                  |              |
| cyclin D1                                                                                           | Ccnd1         | ↑ (1.9)  |            |                    | ↑ (2.0-2.1)      | 1371150_at   |
| cyclin D2                                                                                           | Ccnd2         | ↑ (2.7)  |            |                    | ↑ (2.0)          | 1370810_at   |
| cyclin D3                                                                                           | Ccnd3         |          |            |                    | ↑ (2.0-2.2)      | 1369935_at   |
| chemokine (C-X-C motif) ligand 14/NADH dehydrogenase                                                | Cxcl14        | ↑ (5.1)  |            |                    | ↑ (7.8-37.5)     | 1388485_at   |
| DNA synthesis-dihydrofolate reductase                                                               | Dhfr          | ↑ (3.9)  |            |                    | ↑ (3.3)          | 1383536_at   |
| growth arrest and DNA-damage-inducible 45 alpha                                                     | Gadd45a       | ↑ (2.8)  |            | ↑ (3-12)           | ↑ (3.5-3.8)      | 1368947_at   |
| DNA replication protein                                                                             | Mcmd6         |          |            |                    | ↑ (2.0)          | 1371074_a_at |
| <b>immediate early genes and transcription factors</b>                                              |               |          |            |                    |                  |              |
| activating transcription factor 3                                                                   | Atf3          | ↑ (8.4)  |            | ↑ (7-15)           | ↑ (8.3)          | 1369268_at   |
| paired related homeobox protein-like 1                                                              | DRG11/ Prrxl1 | ↓ (3.5)  |            | ↓ (2-8)            |                  | 1388012_at   |
| early growth response 1                                                                             | Egr1/ NGFI-A  | ↑ (2.4)  |            |                    | ↑ (2.1-2.4)      | 1368321_at   |
| POU domain, class 3, transcription factor                                                           | Pou3f1        | ↑ (4.0)  |            |                    | ↑ (2.8)          | 1370432_at   |

|                                                                               |               |          |  |           |             |              |
|-------------------------------------------------------------------------------|---------------|----------|--|-----------|-------------|--------------|
| 1/transcriptional repressor of myelin-specific genes                          |               |          |  |           |             |              |
| RAB3A, member RAS oncogene family                                             | Rab3a         | ↓ (2.2)  |  | ↓ (3-4)   | ↓ (2.8)     | 1369816_at   |
| stress-induced-phosphoprotein 1/heat shock protein 70/90 organising protein   | Stip1         |          |  | ↓ (3-5)   |             | 1398877_at   |
| activity and neurotransmitter-induced early gene protein 4 (ania-4)           | Ania4         | ↑ (2.0)  |  | ↑ (3-4)   |             | 1387276_at   |
| <b>ion channel / ion pump</b>                                                 |               |          |  |           |             |              |
| ATPase, Na+/K+ transporting, alpha 1 polypeptide/Na, K-ATPase alpha-1 subunit | Atp1a1        | ↓ (3.4)  |  | ↓ (4-11)  | ↓ (2.2)     | 1367585_a_at |
| ATPase, Ca++ transporting, plasma membrane 3                                  | Atp2b3        | ↓ (1.9)  |  |           | ↓ (2.1)     | 1388037_at   |
| calcium channel, voltage-dependent, alpha2/delta subunit 1                    | Cacna2d1      | ↑ (2.7)  |  | ↑ (3-6)   | ↑ (2.9)     | 1369649_at   |
| cholinergic receptor, nicotinic, alpha polypeptide 3                          | Chrna3        | ↓ (4.6)  |  | ↓ (4-32)  | ↓ (2.2)     | 1369001_at   |
| glutamate receptor, ionotropic, kainate 1                                     | Grik1         | ↓ (3.7)  |  |           | ↓ (2.3)     | 1387309_a_at |
| 5-hydroxytryptamine (serotonin) receptor 3a                                   | Htr3a         | ↓ (3.55) |  | ↓ (10-79) | ↓ (2.5-4.4) | 1369428_a_at |
| potassium voltage-gated channel, shaker-related subfamily, member 4           | Kcna4/Kv1.4   | ↓ (3.0)  |  |           | ↓ (2.3)     | 1369043_at   |
| potassium voltage gated channel, Shal-related family, member 3                | Kcnd3/Kv4.3   | ↓ (5.1)  |  |           | ↓ (3.5)     | 1369144_a_at |
| potassium voltage-gated channel, delayed-rectifier, subfamily S, member 3     | Kcns3/Kv9.3   | ↓ (3.2)  |  | ↓ (3-48)  | ↓ (2.4)     | 1368751_at   |
| sodium channel, voltage-gated, type 10, alpha polypeptide                     | Scn10a/Nav1.8 | ↓ (4.1)  |  | ↓ (3-5)   | ↓ (2.8)     | 1368351_at   |
| sodium channel, voltage-gated, type11, alpha polypeptide                      | Scn11a/Nav1.9 | ↓ (4.35) |  | ↓ (4-60)  | ↓ (3.6)     | 1368768_at   |
| sodium channel, voltage-gated, type 1, alpha polypeptide                      | Scn1a/Nav1.1  | ↓ (2.3)  |  | ↓ (23-26) | ↓ (2.2)     | 1369210_at   |
| solute carrier family 24 (sodium/potassium/calcium exchanger), member 2       | Slc24a2       | ↓ (3.1)  |  |           | ↓ (2.2)     | 1388000_at   |
| <b>neuroinflammation and immune activation</b>                                |               |          |  |           |             |              |
| alpha-2-macroglobulin                                                         | A2m           | ↑ (2.6)  |  |           | ↑ (2.3)     | 1367794_at   |
| a disintegrin and metalloproteinase domain 17/TNF converting                  | Adam17        | ↑ (1.8)  |  |           | ↑ (2.2)     | 1367922_at   |
| allograft inflammatory factor 1                                               | Aif1          | ↑ (8.9)  |  | ↑ (3-6)   | ↑ (3.1)     | 1368558_s_at |
| complement component 1, q subcomponent, beta polypeptide                      | C1qb          |          |  | ↑ (8-69)  | ↑ (6.5-9.0) | 1370215_at   |
| complement component 1, r subcomponent (predicted)                            | C1r_predicted | ↑ (3.5)  |  |           | ↑ (2.9)     | 1383241_at   |
| complement component 3                                                        | C3            | ↑ (6.4)  |  |           | ↑ (2.3-2.7) | 1368000_at   |
| complement component 4a /// complement                                        | C4a /// C4-2  | ↑ (4.25) |  | ↑ (7-26)  | ↑ (3.1)     | 1370892_at   |

|                                                                                                       |               |          |         |            |             |              |
|-------------------------------------------------------------------------------------------------------|---------------|----------|---------|------------|-------------|--------------|
| component 4, gene 2                                                                                   |               |          |         |            |             |              |
| CD24 antigen                                                                                          | Cd24          |          |         | ↓ (3-4)    |             | 1369953_a_at |
| CD74 antigen /MHCII(IA)-associated invariant chain                                                    | Cd74          | ↑ (6.0)  |         | ↑ (9-21)   | ↑ (5.5-7.4) | 1367679_at   |
| Fc receptor, IgG, low affinity III /// Fc gamma receptor II beta                                      | Fcgr3         | ↑ (2.9)  |         |            | ↑ (3.2-4.0) | 1398246_s_at |
| guanylate nucleotide binding protein 2                                                                | Gbp2          | ↑ (3.5)  |         |            | ↑ (3.6)     | 1368332_at   |
| interferon induced transmembrane protein 3                                                            | Ifitm3        | ↑ (2.4)  |         | ↑ (2-4)    | ↑ (2.1)     | 1387995_a_at |
| interleukin 18                                                                                        | Il18          |          |         |            | ↑ (2.6)     | 1369665_a_at |
| lectin, galactose binding, soluble 3/IgE binding protein                                              | Lgals3        | ↑ (1.7)  |         | ↑ (2-3)    |             | 1386879_at   |
| Fc gamma receptor II beta                                                                             | LOC498276     | ↑ (5.8)  |         |            | ↑ (3.2-4.0) | 1367850_at   |
| major histocompatibility complex, class II, DM beta                                                   | MHCII M-beta  | ↑ (3.2)  |         |            | ↑ (4.3)     | 1370882_at   |
| pancreatitis-associated protein                                                                       | Pap           | ↑ (22.8) | ↑ (1.2) | ↑ (2-17)   | ↑ (4.6)     | 1368238_at   |
| RT1 class II, locus Ba/MHC RT1-B region class II (Ia antigen) A-alpha glycoprotein                    | RT1-Ba        | ↑ (2.85) |         | ↑ (5-7)    | ↑ (5.7)     | 1370822_at   |
| RT1 class II, locus Bb/MHC class II antigen RT1.B-1 beta-chain                                        | RT1-Bb        | ↑ (6.9)  |         | ↑ (3-6)    | ↑ (5.2-6.2) | 1371033_at   |
| RT1 class II, locus Bb/MHC class II antigen RT1.B beta-chain                                          | RT1-Bb        |          |         | ↑ (14-97)  | ↑ (5.2-6.2) | 1371065_at   |
| RT1 class II, locus Da/MHC class II RT1.u-D-alpha chain                                               | RT1-Da        | ↑ (4.8)  |         | ↑ (6-21)   | ↑ (5.4-7.0) | 1370883_at   |
| RT1 class II, locus Db1/RT1.D beta chain                                                              | RT1-Db1       | ↑ (3.55) |         | ↑ (3-79)   | ↑ (5.7-6.5) | 1370382_at   |
| serine (or cysteine) proteinase inhibitor, clade G (C1 inhibitor), member 1, (angioedema, hereditary) | Serping1      | ↑ (2.9)  |         |            | ↑ (2.3)     | 1372254_at   |
| <b>neuropeptides/neurotransmission</b>                                                                |               |          |         |            |             |              |
| adenylate cyclase activating polypeptide 1                                                            | Adcyap1/PACAP | ↑ (3.9)  |         |            | ↑ (2.3)     | 1368892_at   |
| Adenylate cyclase activating polypeptide 1                                                            | Adcyap1/PACAP | ↑ (5.8)  |         |            | ↑ (2.3)     | 1394908_at   |
| calcitonin/calcitonin-related polypeptide, alpha                                                      | Calca/CGRP    | ↓ (2.2)  |         | ↓ (4-15)   |             | 1370775_a_at |
| calcitonin-related polypeptide, beta                                                                  | Calcb         | ↓ (2.3)  |         | ↓ (3-18)   |             | 1370562_at   |
| galanin                                                                                               | Gal           | ↑ (6.8)  |         | ↑ (16-42)  | ↑ (18.5)    | 1387088_at   |
| islet amyloid polypeptide                                                                             | Iapp          |          |         |            | ↓ (4.4)     | 1387660_at   |
| neuropeptide Y                                                                                        | Npy           | ↑ (8.6)  | ↑ (1.9) | ↑ (16-181) | ↑ (45.6)    | 1387154_at   |
| secretory granule neuroendocrine protein 1                                                            | Sgne1         |          |         | ↓ (2-3)    |             | 1367992_at   |
| somatostatin                                                                                          | Sst           | ↓ (2.8)  |         | ↓ (9-42)   | ↓ (3.3-4.4) | 1367762_at   |
| tachykinin 1/substance P                                                                              | Tac1          | ↓ (2.2)  |         | ↓ (3-10)   | ↓ (2.1)     | 1369309_a_at |
| vasoactive intestinal polypeptide                                                                     | Vip           | ↑ (19.3) |         | ↑ (10-64)  | ↑ (14.5)    | 1377146_at   |
| <b>other</b>                                                                                          |               |          |         |            |             |              |
| amyloid beta (A4) precursor protein-binding, family B, member 1                                       | Apbb1/F E65   | ↓ (2.0)  |         | ↓ (2-3)    |             | 1367842_at   |
| apolipoprotein B editing complex 1                                                                    | Apobec1       |          |         |            | ↑ (2.7)     | 1368270_at   |

|                                                                        |                |         |         |          |         |              |
|------------------------------------------------------------------------|----------------|---------|---------|----------|---------|--------------|
| cytochrome c oxidase, subunit Va                                       | Cox5a          |         |         | ↓ (2-4)  |         | 1370888_at   |
| SH3 domain binding protein CR16                                        | Cr16           | ↓ (2.2) | ↑ (1.3) | ↓ (3-12) |         | 1370648_a_at |
| decay accelerating factor 1                                            | Daf1           | ↓ (3.8) |         |          | ↓ (2.3) | 1370406_a_at |
| dynein, cytoplasmic, intermediate chain 1                              | Dncic1         |         |         | ↓ (2-4)  |         | 1387025_at   |
| dynamin 1-like                                                         | Dnm1l          |         |         | ↓ (2-23) |         | 1369220_at   |
| dipeptidylpeptidase 6                                                  | Dpp6           | ↓ (3.9) |         | ↓ (3-15) |         | 1369390_a_at |
| Fatty acid binding protein 7, brain / Brain lipid-binding protein      | Fabp7          |         | ↓ (1.3) |          | ↓ (2.0) | 1370024_at   |
| glutathione peroxidase 1                                               | Gpx1           | ↑ (1.4) |         | ↑ (2-3)  |         | 1367576_at   |
| glycogenin 1                                                           | Gyg1           | ↓ (1.5) |         |          | ↓ (2.0) | 1367900_at   |
| Hexokinase 2                                                           | Hk2            | ↑ (1.9) |         |          | ↑ (2.4) | 1383519_at   |
| high mobility group box 2                                              | Hmgb2/HMG2     | ↑ (3.6) |         | ↑ (3-16) |         | 1367676_at   |
| leukocyte cell derived chemotaxin 1                                    | Lect1/Chm-1    | ↓ (1.8) |         | ↓ (2-5)  |         | 1387164_at   |
| lin-7 homolog b (C. elegans)                                           | Lin7b          | ↓ (3.2) |         |          | ↓ (2.3) | 1370078_at   |
| lumican                                                                | Lum            | ↑ (2.7) |         | ↑ (2-6)  | ↑ (2.2) | 1367749_at   |
| lysozyme                                                               | Lysz           | ↑ (5.5) |         |          | ↑ (3.0) | 1370154_at   |
| malate dehydrogenase 1, NAD (soluble)                                  | Mdh1           |         |         | ↓ (2-3)  |         | 1367653_a_at |
| matrix metalloproteinase 2/gelatinase                                  | Mmp2           | ↑ (2.3) |         |          | ↑ (2.1) | 1370301_at   |
| myocilin                                                               | Myoc           | ↑ (2.5) |         | ↑ (2-3)  |         | 1387313_at   |
| NCK-associated protein 1                                               | Nckap1/Nap1    | ↓ (1.5) |         | ↓ (2-8)  |         | 1388196_at   |
| proteasome (prosome, macropain) subunit, beta type 9                   | Psmb9          | ↑ (3.4) |         |          | ↑ (2.2) | 1370186_at   |
| parvalbumin                                                            | Pvalb          | ↓ (3.1) |         |          | ↓ (2.1) | 1370214_at   |
| poliovirus receptor/Tumor-associated glycoprotein E4                   | PVR            | ↑ (5.4) |         |          | ↑ (2.0) | 1370177_at   |
| cysteine-rich protein 2                                                | RGD:1302959    | ↓ (1.8) |         | ↓ (2-3)  |         | 1367604_at   |
| LPS-induced TNF-alpha factor/Estrogen responsive uterine RNA           | RGD:69294      | ↑ (2.2) |         |          | ↑ (2.2) | 1370928_at   |
| major histocompatibility complex, class II, DM alpha                   | RT1.Ma         | ↑ (2.7) |         | ↑ (2-13) |         | 1370904_at   |
| secretogranin 2                                                        | Scg2           | ↓ (2.9) |         | ↓ (4-14) |         | 1368044_at   |
| steroid 5-alpha-reductase 2 / Xenosine dehydrogenase/oxidase           | Srd5a2         |         |         |          | ↑ (2.8) | 1387580_at   |
| transglutaminase 1                                                     | Tgm1           | ↑ (3.0) |         |          | ↑ (3.8) | 1370051_at   |
| transmembrane 4 superfamily member 3                                   | Tm4sf3/D6.1 A  | ↓ (1.6) |         | ↓ (3-4)  | ↓ (2.2) | 1368052_at   |
| xanthine dehydrogenase / Xenosine dehydrogenase/oxidase                | Xdh            | ↑ (2.4) |         |          | ↑ (2.8) | 1369973_at   |
| ATPase, H+ transporting, V1 subunit B, isoform 2                       | Atp6v1b2       | ↓ (3.9) |         | ↓ (2-10) |         | 1387664_at   |
| benzodiazepin receptor                                                 | Bzrp           | ↑ (5.3) |         | ↑ (3-7)  | ↑ (3.2) | 1370249_at   |
| calcium-sensing receptor/Kidney extracellular calcium-sensing receptor | Casr           | ↓ (3.9) | ↑ (1.4) | ↓ (7-20) |         | 1369158_at   |
| ceroid-lipofuscinosis, neuronal 6 (predicted) / calmodulin homolog     | Cln6_predicted | ↓ (3.6) |         |          | ↓ (3.1) | 1375026_at   |

|                                                                                    |                    |          |  |           |             |              |
|------------------------------------------------------------------------------------|--------------------|----------|--|-----------|-------------|--------------|
| chemokine (C-X-C motif) ligand 10/ras activating protein                           | Cxcl10             | ↑ (7.5)  |  |           | ↑ (2.7)     | 1387969_at   |
| dual specificity phosphatase 6                                                     | Dusp6              | ↑ (2.4)  |  |           | ↑ (2.0)     | 1377064_at   |
| GTP cyclohydrolase 1                                                               | Gch                | ↑ (5.4)  |  |           | ↑ (2.8)     | 1387221_at   |
| glial cell line derived neurotrophic factor family receptor alpha 1                | Gfra1/<br>GDNFR1   | ↑ (2.5)  |  |           | ↑ (2.2)     | 1367954_at   |
| guanine nucleotide binding protein, alpha o/G-alpha-0                              | Gnao               | ↓ (2.6)  |  | ↓ (2-3)   | ↓ (2.1)     | 1368879_a_at |
| similar to Tescalcin / Calcium binding protein                                     | LOC288<br>689      | ↓ (2.2)  |  |           | ↓ (2.3)     | 1384202_at   |
| NEL-like 1 (chicken)/protein kinase C-binding protein Nel-homolog protein          | Nell1              | ↓ (2.0)  |  | ↓ (4-5)   | ↓ (2.4)     | 1368120_at   |
| neurotrophic tyrosine kinase, receptor, type 1                                     | Ntrk1              | ↓ (3.6)  |  | ↓ (3)     |             | 1369000_at   |
| purinergic receptor P2X, ligand-gated ion channel, 3                               | P2rx3              | ↓ (1.7)  |  | ↓ (2-3)   |             | 1368667_at   |
| phospholipase C, delta 4                                                           | Plcd4              | ↓ (4.3)  |  | ↓ (2-24)  | ↓ (2.8)     | 1387065_at   |
| protein tyrosine phosphatase, non-receptor type 5/striatum-enriched phosphatase    | Ptpn5              | ↑ (4.6)  |  |           | ↑ (3.3)     | 1368421_at   |
| protein tyrosine phosphatase, receptor type, O/Tyr phosphatase D30                 | Ptpro              | ↑ (2.5)  |  |           | ↑ (2.0)     | 1368412_a_at |
| regulator of G-protein signaling 4                                                 | Rgs4               | ↓ (2.75) |  | ↓ (10-15) | ↓ (2.7)     | 1368505_at   |
| S100 calcium-binding protein A4/protein p9Ka homologous to calcium binding protein | S100a4             | ↑ (2.2)  |  | ↑ (3-5)   | ↑ (2.0)     | 1367846_at   |
| Transferrin receptor                                                               | Tfrc               | ↓ (1.55) |  |           | ↓ (2.1)     | 1388750_at   |
| visinin-like 1                                                                     | Vsnl1/<br>NVP      | ↓ (3.6)  |  | ↓ (4-37)  | ↓ (2.1)     | 1368853_at   |
| <b>related to growth and synaptogenesis</b>                                        |                    |          |  |           |             |              |
| acyl-CoA synthetase long-chain family member 4                                     | Acsl4              | ↑ (2.1)  |  | ↑ (3-7)   |             | 1387101_at   |
| amyloid beta (A4) precursor-like protein 2                                         | Aplp2/Y<br>WK-II   | ↓ (3.2)  |  | ↓ (2-3)   |             | 1388121_at   |
| apolipoprotein D                                                                   | ApoD               | ↑ (3.2)  |  | ↑ (3-8)   | ↑ (2.4)     | 1398258_at   |
| arginase 1                                                                         | Arg1               | ↑ (18.0) |  | ↑ (11-17) | ↑ (4.2)     | 1368266_at   |
| actin related protein 2/3 complex, subunit 1B                                      | Arpc1b/<br>p41-Arc |          |  | ↑ (2-3)   | ↑ (2.4-2.6) | 1386925_at   |
| asialoglycoprotein receptor 2/hepatic lectin                                       | Asgr2              |          |  |           | ↑ (2.1)     | 1368362_a_at |
| biglycan                                                                           | Bgn                |          |  | ↑ (2-3)   |             | 1367594_at   |
| B-cell translocation gene 1, anti-proliferative                                    | Btg1               | ↑ (1.8)  |  | ↑ (2-3)   | ↑ (2.2)     | 1367657_at   |
| complement component 1, s subcomponent/serine protease                             | C1s                | ↑ (3.8)  |  | ↑ (3-12)  | ↑ (3.7)     | 1387893_at   |
| carbonic anhydrase 2                                                               | Ca2                | ↓ (1.9)  |  |           | ↓ (2.0)     | 1367733_at   |
| collagen, type 1, alpha 1                                                          | Col1a1             |          |  | ↑ (2-3)   |             | 1370864_at   |
| collagen, type III, alpha 1                                                        | Col3a1             | ↑ (1.8)  |  | ↑ (3-6)   |             | 1370959_at   |
| Collagen, type V, alpha 2                                                          | Col5a2             | ↑ (2.8)  |  |           | ↑ (2.4)     | 1373463_at   |
| cellular retinoic acid binding protein 2/Retinoid acid-binding protein             | Crabp2             | ↑ (4.4)  |  | ↑ (4-5)   | ↑ (3.5)     | 1370391_at   |
| cysteine-rich secretory                                                            | Crisp1             | ↑ (24.0) |  |           | ↑ (6.0)     | 1368633_at   |



|                                                                              |                   |          |         |          |             |              |
|------------------------------------------------------------------------------|-------------------|----------|---------|----------|-------------|--------------|
| protein 1/epididymal glycoprotein                                            |                   |          |         |          |             |              |
| cold shock domain protein A                                                  | Csda/<br>RYB-a    |          |         | ↑ (2-4)  |             | 1370376_a_at |
| cysteine and glycine-rich protein 2                                          | Csrp2/<br>SmLIM   | ↑ (3.0)  |         | ↑ (2-4)  |             | 1370282_at   |
| cysteine-rich protein/muscle LIM protein                                     | Csrp3             | ↑ (16.7) |         | ↑ (3-13) | ↑ (4.2-5.0) | 1398243_at   |
| cathepsin S                                                                  | Ctss              | ↑ (6.9)  |         | ↑ (3-9)  | ↑ (4.0)     | 1387005_at   |
| decorin                                                                      | Dcn               | ↑ (2.2)  |         | ↑ (3-5)  |             | 1370956_at   |
| dihydropyrimidinase-like 4 / Collapsin response mediating protein 3          | Dpysl4/<br>CRMP-3 | ↓ (2.3)  |         | ↓ (4-42) | ↓ (3.0)     | 1371049_at   |
| fatty acid binding protein 3/low molecular weight fatty acid binding protein | Fabp3             | ↓ (2.2)  |         | ↓ (2-11) | ↓ (2.4)     | 1367660_at   |
| Fas apoptotic inhibitory molecule 2/neural membrane protein 35               | Faim2             | ↓ (5.05) |         | ↓ (3-4)  |             | 1370625_at   |
| fasciculation and elongation protein zeta 1 (zygin I)                        | Fez1              | ↓ (2.0)  |         | ↓ (3-5)  |             | 1367918_at   |
| fibroblast growth factor 9                                                   | Fgf9              | ↓ (2.8)  |         | ↓ (2-3)  |             | 1370747_at   |
| fibronectin 1                                                                | Fn1               | ↑ (3.4)  |         | ↑ (3-9)  | ↑ (2.3-2.4) | 1370234_at   |
| growth associated protein 43                                                 | Gap43             | ↑ (1.9)  |         | ↑ (2-5)  | ↑ (2.2)     | 1367930_at   |
| growth arrest specific 7                                                     | Gas7              | ↑ (2.1)  |         | ↑ (2-3)  | ↑ (2.3)     | 1370963_at   |
| glial fibrillary acidic protein                                              | Gfap              | ↑ (2.6)  |         | ↑ (3-7)  | ↑ (6.1)     | 1368353_at   |
| glypican 3/Developmentally regulated protein                                 | Gpc3/<br>OCI-5    |          |         | ↑ (3-13) | ↑ (2.2)     | 1368395_at   |
| H19 fetal liver mRNA                                                         | H19/<br>ASM15     | ↑ (3.4)  |         | ↑ (9-18) |             | 1371298_at   |
| insulin-like growth factor binding protein 3                                 | Igfbp3            | ↑ (3.0)  |         |          | ↑ (2.0)     | 1386881_at   |
| insulin-like growth factor binding protein 6                                 | Igfbp6            | ↑ (1.69) |         | ↑ (2-4)  | ↑ (2.0)     | 1372168_s_at |
| insulin induced gene 1                                                       | Insig1            | ↓ (1.7)  |         | ↓ (2-3)  |             | 1367894_at   |
| insulin related protein 2/islet-2                                            | Isl2              | ↓ (3.3)  |         | ↓ (5-10) |             | 1369530_at   |
| lactate dehydrogenase B                                                      | Ldhb              |          |         | ↓ (2-3)  |             | 1370218_at   |
| lipase A, lysosomal acid                                                     | Lipa              | ↓ (1.48) |         | ↓ (2-3)  |             | 1368075_at   |
| lysyl oxidase                                                                | Lox               | ↑ (3.1)  |         | ↑ (3-21) |             | 1368172_a_at |
| microtubule-associated protein tau                                           | Mapt              |          | ↑ (1.4) | ↓ (2)    |             | 1368137_at   |
| macrophage galactose N-acetyl-galactosamine specific lectin 1                | Mgl1              | ↑ (4.00) |         |          | ↑ (2.3)     | 1368464_at   |
| matrix metalloproteinase 16/MT3-MMP-del                                      | Mmp16             | ↑ (4.7)  |         |          | ↑ (2.2)     | 1368590_at   |
| Matrix metalloproteinase 23                                                  | Mmp23/<br>MMP-11  |          |         |          | ↑ (2.1)     | 1368961_at   |
| myosin light chain, regulatory B                                             | Mrlcb             | ↑ (2.2)  |         | ↑ (2-3)  |             | 1388114_at   |
| N-myc downstream regulated 4/development-related protein                     | Ndr4              |          |         | ↓ (2-3)  |             | 1370229_at   |
| neurofilament 3, medium                                                      | Nef3              | ↓ (1.4)  |         | ↓ (5-6)  |             | 1367845_at   |
| neuronal pentraxin 1                                                         | Nptx1             | ↓ (4.05) |         |          | ↓ (2.0-2.5) | 1370517_at   |
| neuronal pentraxin II                                                        | Nptx2/<br>Narp    | ↓ (3.7)  |         | ↓ (2-3)  |             | 1373559_at   |
| neuritin                                                                     | Nrn1              | ↓ (2.9)  |         | ↓ (5-9)  | ↓ (2.7)     | 1386969_at   |
| nuclear protein 1                                                            | Nupr1/p8          | ↑ (4.6)  |         | ↑ (3-8)  |             | 1367847_at   |
| parathyroid hormone-like peptide                                             | Pthlh/<br>PTHrP   | ↑ (1.6)  |         |          | ↑ (10.1)    | 1368681_at   |

|                                                                        |               |          |         |           |             |              |
|------------------------------------------------------------------------|---------------|----------|---------|-----------|-------------|--------------|
| retinol binding protein 1, cellular/Retinoid acid-binding protein CRBP | Rbp1          | ↑ (4.7)  |         | ↑ (2-6)   | ↑ (3.1)     | 1367939_at   |
| neurofilament, light polypeptide                                       | RGD:621458    | ↓ (1.7)  |         | ↓ (4-7)   |             | 1370058_at   |
| syndecan 1 / heparan sulphate proteoglycan core protein                | Sdc1          | ↑ (4.7)  |         |           | ↑ (2.4)     | 1367849_at   |
| serine (or cysteine) proteinase inhibitor, clade H, member 1           | Serpinh1/gp46 |          |         | ↑ (2-16)  |             | 1369009_at   |
| SH3 domain protein 2A                                                  | Sh3gl2/SH3p4  |          |         | ↓ (5-11)  |             | 1396464_at   |
| synaptosomal-associated protein 25                                     | SNAP-25B      | ↓ (1.5)  |         |           | ↓ (2.2)     | 1387073_at   |
| similar to Cornifin alpha (Small proline-rich protein 1)               | Sprr1a        | ↑ (19.5) |         |           | ↑ (3.3-7.0) | 1371248_at   |
| stathmin-like 4                                                        | Stmn4         | ↑ (4.0)  |         | ↑ (2-3)   | ↑ (3.2)     | 1370315_a_at |
| synaptic vesicle glycoprotein 2b                                       | Sv2b          | ↓ (1.6)  | ↓ (2.3) | ↓ (11-26) | ↓ (2.0)     | 1369627_at   |
| synapsin II                                                            | Syn2          |          |         | ↓ (3-5)   |             | 1370431_at   |
| synaptophysin/major synaptic vesicle protein p38                       | Syp           | ↓ (2.25) |         | ↓ (2-3)   |             | 1368276_at   |
| thrombospondin 4                                                       | Thbs4         | ↑ (3.8)  |         | ↑ (3-20)  | ↑ (2.9)     | 1388138_at   |
| tissue inhibitor of metalloproteinase 1                                | Timp1         | ↑ (3.2)  |         |           | ↑ (2.3)     | 1367712_at   |
| urocortin / corticotensin                                              | Ucn           |          |         |           | ↑ (2.3)     | 1387645_at   |
| UDP glycoronosyltransferase                                            | Ugt1          | ↑ (2.6)  |         | ↑ (2-30)  | ↑ (2.5-3.1) | 1370613_s_at |
| vesicle-associated membrane protein 1                                  | Vamp1         | ↓ (5.2)  |         | ↓ (2-23)  | ↓ (2.0-2.5) | 1370556_at   |
| VGF nerve growth factor inducible                                      | Vgf           | ↑ (3.45) | ↑ (1.3) | ↑ (2-3)   | ↑ (2.6)     | 1368359_a_at |
| vimentin                                                               | Vim           |          |         | ↑ (2-4)   |             | 1367574_at   |

**Supplementary Table 6:** Functional categories of genes highlighted by MAPPFinder for the SNT model

| GO Name                                                                                   | GO Type | % genes up-regulated compared to genes present in array | % genes measured in the array compared to GP genes at this term | Z Score | Permute P |
|-------------------------------------------------------------------------------------------|---------|---------------------------------------------------------|-----------------------------------------------------------------|---------|-----------|
| <b>Up-regulated</b>                                                                       |         |                                                         |                                                                 |         |           |
| structural constituent of ribosome                                                        | F       | 58.4                                                    | 39.2                                                            | 10.98   | 0         |
| immune response                                                                           | P       | 45.8                                                    | 42.9                                                            | 7.66    | 0         |
| antigen processing and presentation                                                       | P       | 66.7                                                    | 43.5                                                            | 6.43    | 0         |
| immunoglobulin mediated immune response                                                   | P       | 70.0                                                    | 44.4                                                            | 5.92    | 0         |
| antigen processing and presentation of peptide antigen                                    | P       | 72.2                                                    | 75.0                                                            | 5.86    | 0         |
| defense response                                                                          | P       | 39.4                                                    | 39.6                                                            | 5.65    | 0         |
| antigen processing and presentation of exogenous antigen                                  | P       | 76.9                                                    | 81.3                                                            | 5.41    | 0         |
| antigen processing and presentation of exogenous peptide antigen via MHC class II         | P       | 81.8                                                    | 84.6                                                            | 5.39    | 0         |
| antigen processing and presentation of peptide or polysaccharide antigen via MHC class II | P       | 81.8                                                    | 73.3                                                            | 5.39    | 0         |

|                                                  |   |      |      |      |       |
|--------------------------------------------------|---|------|------|------|-------|
| cytokine activity                                | F | 44.0 | 34.2 | 4.64 | 0     |
| regulation of immune response                    | P | 44.4 | 46.4 | 4.47 | 0     |
| acute inflammatory response                      | P | 48.5 | 47.8 | 4.43 | 0     |
| response to wounding                             | P | 33.6 | 50.2 | 4.36 | 0     |
| positive regulation of immune response           | P | 45.0 | 49.4 | 4.31 | 0     |
| innate immune response                           | P | 66.7 | 34.3 | 4.28 | 0     |
| rRNA binding                                     | F | 66.7 | 80.0 | 4.28 | 0.001 |
| inflammatory response                            | P | 37.2 | 45.6 | 4.25 | 0     |
| complement activation, classical pathway         | P | 83.3 | 35.3 | 4.08 | 0     |
| cytokine production                              | P | 46.7 | 42.3 | 3.96 | 0     |
| double-stranded DNA binding                      | F | 56.3 | 80.0 | 3.88 | 0     |
| phosphate transport                              | P | 45.2 | 52.5 | 3.81 | 0     |
| T cell differentiation                           | P | 52.9 | 37.8 | 3.65 | 0.001 |
| response to biotic stimulus                      | P | 34.7 | 54.7 | 3.60 | 0     |
| peptide antigen transport                        | P | 71.4 | 70.0 | 3.60 | 0.002 |
| acute-phase response                             | P | 71.4 | 35.0 | 3.60 | 0.001 |
| peptide antigen-transporting ATPase activity     | F | 71.4 | 70.0 | 3.60 | 0.002 |
| neutrophil chemotaxis                            | P | 80.0 | 38.5 | 3.53 | 0.006 |
| response to virus                                | P | 53.3 | 68.2 | 3.46 | 0.003 |
| hemopoiesis                                      | P | 34.2 | 48.0 | 3.46 | 0.001 |
| defense response to bacterium                    | P | 60.0 | 26.3 | 3.37 | 0.006 |
| extracellular matrix organization and biogenesis | P | 45.5 | 57.9 | 3.24 | 0.001 |
| caspase activity                                 | F | 62.5 | 61.5 | 3.19 | 0.009 |
| cell activation                                  | P | 33.3 | 39.9 | 3.17 | 0.001 |

|                                           |   |      |      |      |       |
|-------------------------------------------|---|------|------|------|-------|
| cysteine-type endopeptidase activity      | F | 42.3 | 48.1 | 3.12 | 0.006 |
| carbohydrate binding                      | F | 32.1 | 34.2 | 3.07 | 0.003 |
| T cell selection                          | P | 66.7 | 42.9 | 3.03 | 0.009 |
| response to ionizing radiation            | P | 66.7 | 54.5 | 3.03 | 0.009 |
| cytokine binding                          | F | 50.0 | 26.4 | 3.02 | 0.007 |
| myeloid cell differentiation              | P | 37.8 | 49.3 | 3.02 | 0.001 |
| cell proliferation                        | P | 26.6 | 52.0 | 2.96 | 0.007 |
| embryonic development                     | P | 28.3 | 51.1 | 2.95 | 0.004 |
| T cell receptor signaling pathway         | P | 55.6 | 56.3 | 2.85 | 0.006 |
| urogenital system development             | P | 44.4 | 40.9 | 2.82 | 0.007 |
| leukocyte migration                       | P | 50.0 | 48.0 | 2.80 | 0.008 |
| transcription factor activity             | F | 25.8 | 40.1 | 2.63 | 0.003 |
| negative regulation of cell proliferation | P | 31.3 | 52.9 | 2.62 | 0.009 |

**Down-regulated**

|                                          |   |      |      |      |   |
|------------------------------------------|---|------|------|------|---|
| cation channel activity                  | F | 47.1 | 45.3 | 7.80 | 0 |
| ion channel activity                     | F | 41.3 | 45.8 | 7.63 | 0 |
| potassium channel activity               | F | 55.3 | 48.5 | 7.24 | 0 |
| potassium ion transport                  | P | 52.9 | 45.9 | 7.08 | 0 |
| potassium ion binding                    | F | 58.3 | 47.4 | 6.82 | 0 |
| voltage-gated ion channel activity       | F | 46.2 | 48.5 | 6.52 | 0 |
| voltage-gated potassium channel activity | F | 54.3 | 46.7 | 6.08 | 0 |
| exocytosis                               | P | 47.1 | 69.9 | 5.94 | 0 |
| metal ion transport                      | P | 34.8 | 45.4 | 5.91 | 0 |
| cation transporter activity              | F | 31.2 | 49.9 | 5.72 | 0 |
| cation transport                         | P | 30.7 | 47.7 | 5.20 | 0 |

|                                                      |   |      |      |      |       |
|------------------------------------------------------|---|------|------|------|-------|
| neurological process                                 | P | 29.6 | 45.0 | 5.08 | 0     |
| axonogenesis                                         | P | 39.7 | 56.3 | 5.02 | 0     |
| cell-cell signaling                                  | P | 30.5 | 60.1 | 5.01 | 0     |
| neurotransmitter secretion                           | P | 48.5 | 78.6 | 5.00 | 0     |
| cellular morphogenesis during differentiation        | P | 37.2 | 58.2 | 4.99 | 0     |
| neuron differentiation                               | P | 31.3 | 58.0 | 4.66 | 0     |
| G-protein coupled receptor protein signaling pathway | P | 30.3 | 9.0  | 4.60 | 0     |
| transmission of nerve impulse                        | P | 30.5 | 66.5 | 4.58 | 0     |
| neurite development                                  | P | 34.1 | 59.9 | 4.52 | 0     |
| regulation of axonogenesis                           | P | 55.6 | 66.7 | 4.50 | 0     |
| synaptic transmission                                | P | 30.8 | 67.2 | 4.25 | 0     |
| homophilic cell adhesion                             | P | 42.9 | 39.3 | 4.24 | 0     |
| extracellular ligand-gated ion channel activity      | F | 46.2 | 44.1 | 4.11 | 0     |
| generation of neurons                                | P | 28.4 | 58.5 | 4.09 | 0     |
| synaptic vesicle transport                           | P | 50.0 | 87.0 | 4.07 | 0.001 |
| MAPKKK cascade                                       | P | 36.4 | 51.9 | 4.02 | 0     |
| diacylglycerol kinase activity                       | F | 71.4 | 58.3 | 3.94 | 0.004 |
| synaptogenesis                                       | P | 58.3 | 92.3 | 3.93 | 0.001 |
| regulation of exocytosis                             | P | 53.3 | 88.2 | 3.87 | 0     |
| glutamate signaling pathway                          | P | 80.0 | 55.6 | 3.85 | 0.002 |
| voltage-gated sodium channel activity                | F | 80.0 | 50.0 | 3.85 | 0.001 |
| regulation of axon extension                         | P | 60.0 | 66.7 | 3.73 | 0.002 |
| negative regulation of neurogenesis                  | P | 60.0 | 66.7 | 3.73 | 0.001 |

|                                                               |   |      |       |      |       |
|---------------------------------------------------------------|---|------|-------|------|-------|
| vesicle-mediated transport                                    | P | 26.3 | 72.4  | 3.73 | 0     |
| secretion                                                     | P | 27.5 | 65.9  | 3.72 | 0     |
| cAMP-mediated signaling                                       | P | 45.5 | 44.9  | 3.69 | 0.004 |
| cell-cell adhesion                                            | P | 32.0 | 47.2  | 3.68 | 0     |
| sodium ion binding                                            | F | 41.4 | 42.6  | 3.65 | 0.001 |
| vesicle targeting                                             | P | 62.5 | 100.0 | 3.53 | 0.006 |
| embryonic limb morphogenesis                                  | P | 45.0 | 44.4  | 3.46 | 0.002 |
| synaptic vesicle exocytosis                                   | P | 54.5 | 91.7  | 3.42 | 0.005 |
| G-protein signaling\, adenylate<br>cyclase activating pathway | P | 66.7 | 25.0  | 3.33 | 0.009 |
| negative regulation of<br>axonogenesis                        | P | 66.7 | 66.7  | 3.33 | 0.009 |
| phosphotyrosine binding                                       | F | 66.7 | 66.7  | 3.33 | 0.008 |
| embryonic morphogenesis                                       | P | 32.7 | 44.7  | 3.29 | 0.001 |
| cell maturation                                               | P | 37.5 | 52.5  | 3.24 | 0.003 |
| JNK cascade                                                   | P | 44.4 | 56.3  | 3.22 | 0.005 |
| cytokinesis                                                   | P | 55.6 | 90.0  | 3.18 | 0.008 |
| phosphoprotein binding                                        | F | 55.6 | 60.0  | 3.18 | 0.008 |
| regulation of heart contraction                               | P | 46.7 | 55.6  | 3.17 | 0.007 |
| synapse organization and<br>biogenesis                        | P | 40.9 | 81.5  | 3.11 | 0.003 |
| GTP binding                                                   | F | 24.2 | 75.4  | 2.96 | 0.003 |
| calcium ion-dependent exocytosis                              | P | 46.2 | 76.5  | 2.90 | 0.006 |
| sodium ion transport                                          | P | 34.3 | 39.8  | 2.87 | 0.007 |
| small GTPase mediated signal<br>transduction                  | P | 23.9 | 71.2  | 2.84 | 0.007 |
| skeletal development                                          | P | 28.4 | 47.1  | 2.81 | 0.008 |
| endocytosis                                                   | P | 29.5 | 64.9  | 2.78 | 0.009 |

|                                     |   |      |      |      |       |
|-------------------------------------|---|------|------|------|-------|
| carboxylic ester hydrolase activity | F | 31.0 | 46.2 | 2.56 | 0.006 |
|-------------------------------------|---|------|------|------|-------|

---



**Supplementary table 7:** Gene sets associated with gene up-regulation in SNT using Gene Set Enrichment Analysis

| Gene set name                        | Source          | Size | NOM p-val | FDR q-val |
|--------------------------------------|-----------------|------|-----------|-----------|
| RIBOSOMAL_PROTEINS                   | GenMAPP         | 86   | 0         | 0         |
| D4GDIPATHWAY                         | BioCarta        | 22   | 0         | 0         |
| CYTOKINE_SIGNALING                   | NetAffx         | 213  | 0         | 0         |
| MACROPHAGE_GENES                     | NetAffx         | 138  | 0         | 4.54E-04  |
| CHEMOKINE_RECEPTORS                  | NetAffx         | 116  | 0         | 6.81E-04  |
| COMPLEMENT_PATHWAY                   | BioCarta        | 16   | 0         | 0.001086  |
| JECHLINGER_EMT_UP                    | Broad Institute | 56   | 0         | 0.001926  |
| HYPERTROPHY_MODEL                    | GenMAPP         | 32   | 0         | 0.012161  |
| CASPASEPATHWAY                       | BioCarta        | 32   | 0         | 0.012678  |
| DORSAM_HOXA9_DN                      | Broad Institute | 33   | 0         | 0.015717  |
| IL1RPATHWAY                          | BioCarta        | 35   | 0         | 0.016604  |
| CELL_PROLIFERATION                   | GO              | 181  | 0         | 0.022541  |
| NTHIPATHWAY                          | BioCarta        | 29   | 0         | 0.022855  |
| BRENTANI_TRANSCRIPTION_FACTORS       | Broad Institute | 54   | 0         | 0.032373  |
| PHENYLALANINE_METABOLISM             | GenMAPP         | 24   | 0         | 0.039248  |
| BRENTANI_DEATH                       | Broad Institute | 73   | 0         | 0.057608  |
| HINATA_NFKB_UP                       | Broad Institute | 119  | 0         | 0.061267  |
| PROLIFERATION_GENES                  | Broad Institute | 385  | 0         | 0.06437   |
| TGF_BETA_SIGNALING_PATHWAY           | Broad Institute | 76   | 0         | 0.064403  |
| APOPTOSIS                            | GenMAPP         | 72   | 0.00159   | 0.059885  |
| PPARAPATHWAY                         | BioCarta        | 81   | 0.001661  | 0.062156  |
| APOPTOSIS_GENMAPP                    | GenMAPP         | 56   | 0.001733  | 0.06894   |
| CELL_GROWTH_AND_OR_MAINTENANCE       | GO              | 55   | 0.001736  | 0.016469  |
| INFLAMMATORY_RESPONSE_PATHWAY        | Broad Institute | 29   | 0.001751  | 0.011817  |
| IL12PATHWAY                          | BioCarta        | 20   | 0.001805  | 0.01518   |
| LAIRPATHWAY                          | BioCarta        | 16   | 0.001815  | 0.02375   |
| CELL_ADHESION                        | GO              | 178  | 0.00292   | 0.098306  |
| BREAST_CANCER_ESTROGEN_SIGNALING     | Gearray         | 118  | 0.00318   | 0.08811   |
| BRENTANI_CELL_ADHESION               | Broad Institute | 123  | 0.00319   | 0.085128  |
| DNAFRAGMENTPATHWAY                   | BioCarta        | 16   | 0.003597  | 0.021337  |
| MRNA_PROCESSING                      | Broad Institute | 45   | 0.005236  | 0.063732  |
| MATRIX_METALLOPROTEINASES            | Broad Institute | 30   | 0.005338  | 0.058942  |
| PORPHYRIN_AND_CHLOROPHYLL_METABOLISM | GenMAPP         | 18   | 0.005618  | 0.053267  |
| BRENTANI_IMMUNE_FUNCTION             | Broad Institute | 34   | 0.00678   | 0.058494  |
| CORDERO_KRAS_KD_VS_CONTROL_UP        | Broad Institute | 91   | 0.007899  | 0.08787   |
| RACCYCDPATHWAY                       | BioCarta        | 37   | 0.008576  | 0.070361  |
| G1_TO_S_CELL_CYCLE_REACTOME          | GenMAPP         | 69   | 0.008606  | 0.103301  |
| SA_MMP_CYTOKINE_CONNECTION           | SigmaAldrich    | 23   | 0.008881  | 0.062922  |
| SMITH_HTERT_UP                       | Broad Institute | 98   | 0.009539  | 0.089285  |

**Supplementary table 8:** Gene sets associated with gene down-regulation in SNT using Gene Set Enrichment Analysis

| Gene set name                                   | Source          | Size | NOM p-val | FDR q-val |
|-------------------------------------------------|-----------------|------|-----------|-----------|
| GPCRS_CLASS_C_METABOTROPIC_Glutamate_PHEROMONE  | GO              | 22   | 0         | 0         |
| CANNABINOID_RELATED                             | NetAffx         | 52   | 0         | 0         |
| OPIOID_RECEPTOR_RELATED                         | NetAffx         | 108  | 0         | 0         |
| GPCRDB_CLASS_C_METABOTROPIC_Glutamate_PHEROMONE | GenMAPP         | 23   | 0         | 4.25E-04  |
| RABPATHWAY                                      | BioCarta        | 20   | 0         | 0.004319  |
| GLYCOLYSIS_AND_Gluconeogenesis                  | GenMAPP         | 53   | 0         | 0.004534  |
| CHOLESTEROL_BIOSYNTHESIS                        | GenMAPP         | 21   | 0         | 0.005172  |
| PAIN_RELATED                                    | NetAffx         | 257  | 0         | 0.007622  |
| GLUCONEOGENESIS                                 | GenMAPP         | 62   | 0         | 0.076639  |
| CALCIUM_REGULATION_IN_CARDIAC_CELLS             | GenMAPP         | 243  | 0         | 0.176252  |
| BIOSYNTHESIS_OF_STEROIDS                        | GenMAPP         | 19   | 0.002128  | 0.021544  |
| BRENTANI_TRANSPORT_OF_VESICLES                  | Broad Institute | 31   | 0.002278  | 0.050005  |
| GLYCEROPHOSPHOLIPID_METABOLISM                  | KEGG            | 51   | 0.002299  | 0.036047  |
| GPCRDB_CLASS_A_RHODOPSIN_LIKE                   | GenMAPP         | 180  | 0.002825  | 0.241339  |
| PENTOSE_PHOSPHATE_PATHWAY                       | GenMAPP         | 18   | 0.004505  | 0.052498  |
| GLYCOLYSIS                                      | GenMAPP         | 62   | 0.004785  | 0.075994  |
| S1P_SIGNALING                                   | Broad Institute | 34   | 0.007212  | 0.046803  |
| GLYCEROLIPID_METABOLISM                         | KEGG            | 43   | 0.007229  | 0.080335  |
| CARBON_FIXATION                                 | KEGG            | 22   | 0.009132  | 0.068452  |
| FATTY_ACID_SYNTHESIS                            | Broad Institute | 26   | 0.009195  | 0.081248  |
